# Supplementary material for: Enantioselective dearomative formal (3+3) cycloadditions of bicyclobutanes with aromatic azomethine imines: access to fused 2,3-diazabicyclo[3.1.1]heptanes
Source: Royal Society of Chemistry journal article supplement (doi:10.1039/d4sc06334a), 2024-01-01
Supplement: d4sc06334a1.pdf [file d4sc06334a1.pdf]

## Supporting Information

### **Enantioselective Dearomatizing Formal (3+3) Cycloadditions of Bicyclobutanes with Aromatic Azomethine Imines: Access to Fused 2,3-Diazabicyclo[3.1.1]heptanes**

Xue-Chun Yang,<sup>‡ a</sup> Feng Wu,<sup>‡ a</sup> Wen-Biao Wu,<sup>‡ a</sup> Xu Zhang,<sup>b</sup> and Jian-Jun Feng<sup>\*a</sup>

<sup>a</sup>*State Key Laboratory of Chemo/Biosensing and Chemometrics, Advanced Catalytic Engineering Research Center of the Ministry of Education, College of Chemistry and Chemical Engineering, Hunan University, Changsha, Hunan 410082, P. R. China*

<sup>b</sup>*School of Chemistry & Chemical Engineering, Yangzhou University, Yangzhou, 225002, P.R. China*

<sup>‡</sup>These authors contributed equally to this work.

\*Email: [jianjunfeng@hnu.edu.cn](mailto:jianjunfeng@hnu.edu.cn)

---

**Table of Contents**

|    |                                                                      |      |
|----|----------------------------------------------------------------------|------|
| 1  | General Information .....                                            | S3   |
| 2  | Optimization Study.....                                              | S4   |
| 3  | General Procedure for the (3+3) Cycloaddition Reactions .....        | S10  |
| 4  | Scale-Up Experiment.....                                             | S12  |
| 5  | Sensitivity Assessment .....                                         | S13  |
| 6  | Unsuccessful Substrates and Control Experiments.....                 | S14  |
| 7  | Non-Linear Effect Study.....                                         | S17  |
| 8  | Synthetic Transformations .....                                      | S17  |
| 9  | General Procedure for the Synthesis of New Bicyclobutanes (GP5)..... | S21  |
| 10 | General Procedure for the Synthesis of New BCB Ketones (GP6) .....   | S22  |
| 11 | Characterization Data of New BCBs and Products .....                 | S22  |
| 12 | NMR Spectra .....                                                    | S116 |
| 13 | Crystal Structure of <b>3qg</b> and ( <i>R</i> )- <b>3qw</b> .....   | S210 |
| 14 | References .....                                                     | S213 |

## 1 General Information

All reactions were performed in flame-dried glassware using conventional Schlenk techniques under a static pressure of nitrogen unless otherwise stated. Liquids and solutions were transferred with syringes. Bicyclo[1.1.0]butanes (BCBs)<sup>[1]</sup> and aromatic azomethine imines<sup>[2]</sup> were prepared according to reported procedures. Zn(OTf)<sub>2</sub> (98%, *Energy Chemical Company*) and other commercially available reagents were purchased from *Leyan*, *Energy Chemical* and *Bide Chemical Company* and used as received. The solvents (CH<sub>2</sub>Cl<sub>2</sub>, 1,2-dichloroethane, Et<sub>2</sub>O, THF and toluene *etc.*) were dried and purified following standard procedures. PhCl and Ethyl acetate (EtOAc) were purchased from *Energy Chemical* (99%, Extra Dry) and used as received. Technical grade solvents for extraction or chromatography (Petroleum ether, CH<sub>2</sub>Cl<sub>2</sub>, and ethyl acetate) were distilled prior to use. Analytical thin layer chromatography (TLC) was performed on silica gel 60 F254 glass plates by *Merck*. Flash column chromatography was performed on silica gel 60 (40–63 μm, 230–400 mesh, ASTM) by *Grace* using the indicated solvents. <sup>1</sup>H, <sup>13</sup>C NMR spectra were recorded in CDCl<sub>3</sub> on Bruker AV400 or 600 instruments. Chemical shifts are reported in parts per million (ppm) and are referenced to the residual solvent resonance as the internal standard (CDCl<sub>3</sub>: δ = 7.26 ppm for <sup>1</sup>H NMR and CDCl<sub>3</sub>: δ = 77.0 ppm for <sup>13</sup>C NMR). Data are reported as follows: chemical shift, multiplicity (s = singlet, d = doublet, t = triplet, q = quartet, m = multiplet), coupling constants (Hz), and integration. The full-scan mass spectra were taken on a hybrid quadrupole-orbitrap mass spectrometer equipped with a heated electrospray ionization source (ThermoFischer Scientific, Bremen, Germany). Chiral HPLC analysis was performed on a Shimadzu LC-20AD instrument using Daicel chiral columns at 35 °C and a mixture of HPLC-grade hexanes and isopropanol as eluent. Acknowledgement: the <sup>1</sup>H, <sup>13</sup>C NMR spectra, single crystal X-ray diffraction and HRMS (ESI) were performed at Analytical Instrumentation Center of Hunan University. The absolute configuration was determined by single crystal X-ray diffraction analysis on Rigaku XtaLAB PRO MM003-DS dual system with a Cu micro-focus source. Diffraction data was collected at 173 K on a Rigaku XtaLAB PRO MM003-DS dual System with a Cu micro-focus source.

## 2 Optimization Study

**Table S1.** Screening of Lewis acid and solvent for the (3+3) cycloaddition of BCB **1a** and azomethine imine **2a**<sup>a</sup>

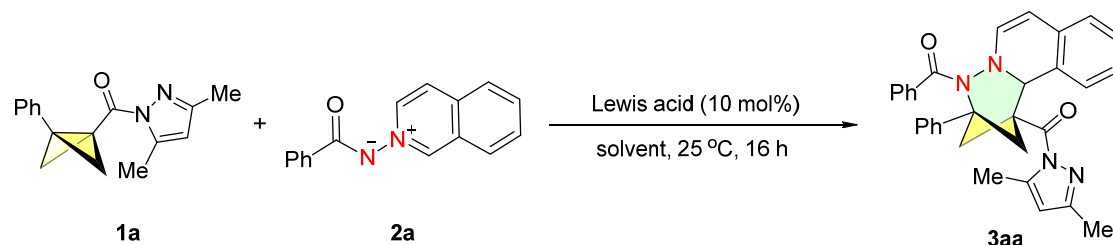

| Entry           | Lewis acid                         | solvent                         | Yield (%) <sup>b</sup> |
|-----------------|------------------------------------|---------------------------------|------------------------|
| 1               | Fe(OTf) <sub>2</sub>               | CH <sub>2</sub> Cl <sub>2</sub> | 30                     |
| 2               | Co(OTf) <sub>2</sub>               | CH <sub>2</sub> Cl <sub>2</sub> | 33                     |
| 3               | Sc(OTf) <sub>3</sub>               | CH <sub>2</sub> Cl <sub>2</sub> | 25                     |
| 4               | Zn(OTf) <sub>2</sub>               | CH <sub>2</sub> Cl <sub>2</sub> | 20                     |
| 5               | Al(OTf) <sub>3</sub>               | CH <sub>2</sub> Cl <sub>2</sub> | 0                      |
| 6               | Ni(OTf) <sub>2</sub>               | CH <sub>2</sub> Cl <sub>2</sub> | 35                     |
| 7               | BF <sub>3</sub> ·Et <sub>2</sub> O | CH <sub>2</sub> Cl <sub>2</sub> | 0                      |
| 8               | Ni(OTf) <sub>2</sub>               | EtOAc                           | 23                     |
| 9               | Ni(OTf) <sub>2</sub>               | toluene                         | 25                     |
| 10              | Ni(OTf) <sub>2</sub>               | THF                             | 11                     |
| 11              | Ni(OTf) <sub>2</sub>               | 1,4-dioxane                     | 22                     |
| 12              | Ni(OTf) <sub>2</sub>               | DCE                             | 63                     |
| 13              | Ni(OTf) <sub>2</sub>               | CH <sub>3</sub> CN              | >99                    |
| 14              | Ni(OTf) <sub>2</sub>               | PhCl                            | 19                     |
| 15 <sup>c</sup> | -                                  | CH <sub>3</sub> CN              | <i>no reaction</i>     |

<sup>a</sup>The reactions were performed with **1a** (0.1 mmol), **2a** (0.12 mmol), Lewis acid catalyst (10 mol%) in solvent (2.0 mL) at room temperature for 16 h. <sup>b</sup>Determined by <sup>1</sup>H NMR analysis using CH<sub>2</sub>Br<sub>2</sub> as an internal standard. Abbreviations: Tf = trifluoromethanesulfonyl; DCE = 1,2-dichloroethane. <sup>c</sup>Run at 80 °C



**Table S2.** Screening of Lewis acid and solvent for the (3+3) cycloaddition of BCB **1g** and azomethine imine **2a**<sup>a</sup>

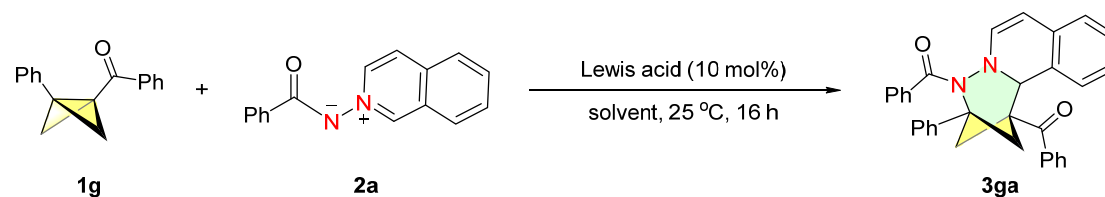

| Entry           | Lewis acid                         | Solvent                         | Yield (%) <sup>b</sup> |
|-----------------|------------------------------------|---------------------------------|------------------------|
| 1               | Ni(OTf) <sub>2</sub>               | MeCN                            | 9                      |
| 2               | Fe(OTf) <sub>2</sub>               | CH <sub>2</sub> Cl <sub>2</sub> | 29                     |
| 3               | Co(OTf) <sub>2</sub>               | CH <sub>2</sub> Cl <sub>2</sub> | 15                     |
| 4               | Sc(OTf) <sub>3</sub>               | CH <sub>2</sub> Cl <sub>2</sub> | 45                     |
| 5               | Zn(OTf) <sub>2</sub>               | CH <sub>2</sub> Cl <sub>2</sub> | 22                     |
| 6               | AgOTf                              | CH <sub>2</sub> Cl <sub>2</sub> | 0                      |
| 7               | Eu(OTf) <sub>3</sub>               | CH <sub>2</sub> Cl <sub>2</sub> | 29                     |
| 8               | BF <sub>3</sub> ·Et <sub>2</sub> O | CH <sub>2</sub> Cl <sub>2</sub> | 18                     |
| 9               | Sc(OTf) <sub>3</sub>               | EtOAc                           | 34                     |
| 10              | Sc(OTf) <sub>3</sub>               | toluene                         | 14                     |
| 11              | Sc(OTf) <sub>3</sub>               | THF                             | 28                     |
| 12              | Sc(OTf) <sub>3</sub>               | 1,4-dioxane                     | 49                     |
| 13              | Sc(OTf) <sub>3</sub>               | DCE                             | 41                     |
| 14              | Sc(OTf) <sub>3</sub>               | CH <sub>3</sub> CN              | 84                     |
| 15              | Sc(OTf) <sub>3</sub>               | PhCl                            | 32                     |
| 16 <sup>c</sup> | Sc(OTf) <sub>3</sub>               | CH <sub>3</sub> CN              | 99                     |

<sup>a</sup>The reactions were performed with **1g** (0.1 mmol), **2a** (0.12 mmol), Lewis acid catalyst (10 mol%) in solvent (2.0 mL) at 25 °C for 16 h. <sup>b</sup>Determined by <sup>1</sup>H NMR analysis using CH<sub>2</sub>Br<sub>2</sub> as an internal standard. <sup>c</sup>Run at 50 °C. Abbreviations: Tf = trifluoromethanesulfonyl; DCE = 1,2-dichloroethane.

**Table S3.** Screening of Lewis acid and solvent for the (3+3) cycloaddition of BCB **1q** and azomethine imine **2d**<sup>a</sup>

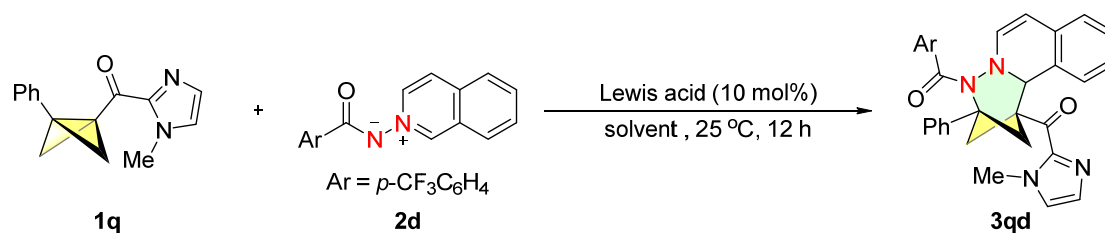

| Entry           | Lewis acid                                     | Solvent                         | Yield (%) <sup>b</sup> |
|-----------------|------------------------------------------------|---------------------------------|------------------------|
| 1               | Eu(OTf) <sub>3</sub>                           | CH <sub>2</sub> Cl <sub>2</sub> | 62                     |
| 2               | Ga(OTf) <sub>3</sub>                           | CH <sub>2</sub> Cl <sub>2</sub> | 65                     |
| 3               | Sc(OTf) <sub>3</sub>                           | CH <sub>2</sub> Cl <sub>2</sub> | 80                     |
| 4               | Zn(OTf) <sub>2</sub>                           | CH <sub>2</sub> Cl <sub>2</sub> | 84                     |
| 5               | Ni(OTf) <sub>2</sub>                           | CH <sub>2</sub> Cl <sub>2</sub> | 86                     |
| 6               | Cu(OTf) <sub>2</sub>                           | CH <sub>2</sub> Cl <sub>2</sub> | 51                     |
| 7               | Fe(OTf) <sub>3</sub>                           | CH <sub>2</sub> Cl <sub>2</sub> | 84                     |
| 8               | Fe(OTf) <sub>2</sub>                           | CH <sub>2</sub> Cl <sub>2</sub> | 90                     |
| 9               | Mg(OTf) <sub>2</sub>                           | CH <sub>2</sub> Cl <sub>2</sub> | 15                     |
| 10              | Yb(OTf) <sub>3</sub>                           | CH <sub>2</sub> Cl <sub>2</sub> | 70                     |
| 11              | Co(OTf) <sub>2</sub>                           | CH <sub>2</sub> Cl <sub>2</sub> | 75                     |
| 12              | BF <sub>3</sub> ·Et <sub>2</sub> O             | CH <sub>2</sub> Cl <sub>2</sub> | 4                      |
| 13              | B(C <sub>6</sub> F <sub>5</sub> ) <sub>3</sub> | CH <sub>2</sub> Cl <sub>2</sub> | 3                      |
| 14              | Fe(OTf) <sub>2</sub>                           | EtOAc                           | 73                     |
| 15              | Fe(OTf) <sub>2</sub>                           | toluene                         | 10                     |
| 16              | Fe(OTf) <sub>2</sub>                           | THF                             | 50                     |
| 17              | Fe(OTf) <sub>2</sub>                           | 1,4-dioxane                     | 65                     |
| 18              | Fe(OTf) <sub>2</sub>                           | DCE                             | 32                     |
| 19              | Fe(OTf) <sub>2</sub>                           | CH <sub>3</sub> CN              | 18                     |
| 20              | Fe(OTf) <sub>2</sub>                           | PhCl                            | 5                      |
| 21 <sup>c</sup> | Fe(OTf) <sub>2</sub>                           | CH <sub>2</sub> Cl <sub>2</sub> | 92                     |

<sup>a</sup>The reactions were performed with **1q** (0.1 mmol), **2d** (0.12 mmol), Lewis acid catalyst (10 mol%) in solvent (2.0 mL) at room temperature for 12 h. <sup>b</sup>Determined by <sup>1</sup>H NMR analysis using CH<sub>2</sub>Br<sub>2</sub> as an internal standard. <sup>c</sup>**2a** (Ar = Ph) was used. Abbreviations: Tf = trifluoromethanesulfonyl; BCF = tris(pentafluorophenyl)borane; DCE = 1,2-dichloroethane.

**Table S4.** Screening of chiral ligands for the enantioselective (3+3) cycloaddition of BCB **1q** and **2d**<sup>a</sup>

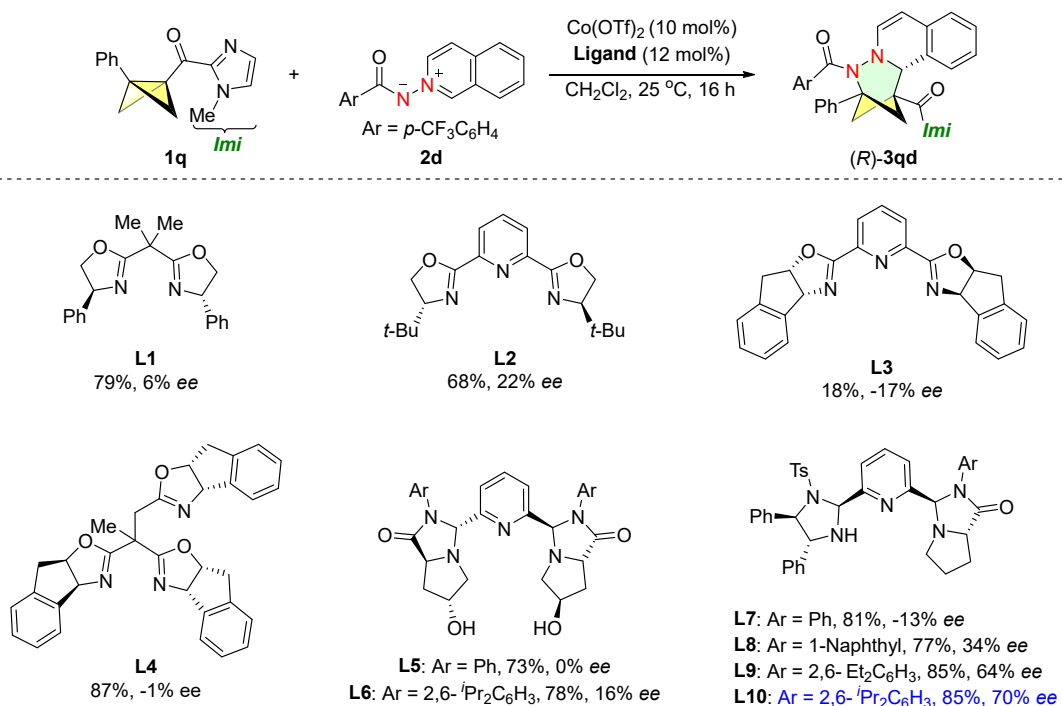

<sup>a</sup>Reaction conditions: **1q** (0.10 mmol), **2d** (0.12 mmol),  $\text{Co}(\text{OTf})_2$  (10 mol%) and **Ligand** (12 mol%),  $\text{CH}_2\text{Cl}_2$  (2.0 mL), 25 °C, under  $\text{N}_2$  for 16 h. The yields of **(R)-3qd** was determined by  $^1\text{H}$  NMR with  $\text{CH}_2\text{Br}_2$  as an internal standard. The ee value was determined by chiral HPLC with hexane/2-propanol.

**Table S5.** Screening of Lewis acid, solvent and temperature for the enantioselective (3+3) cycloaddition of BCB **1q** and **2d**<sup>a</sup>

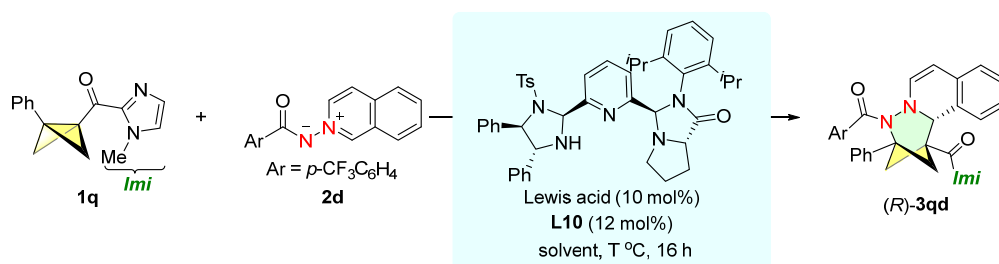

| Entry          | Lewis acid           | Solvent                                                      | T (°C) | Yield (%) <sup>b</sup> | ee (%) <sup>c</sup> |
|----------------|----------------------|--------------------------------------------------------------|--------|------------------------|---------------------|
| 1              | Co(OTf) <sub>2</sub> | CH <sub>2</sub> Cl <sub>2</sub>                              | 25     | 85                     | 70                  |
| 2              | Ga(OTf) <sub>3</sub> | CH <sub>2</sub> Cl <sub>2</sub>                              | 25     | 20                     | 0                   |
| 3              | Fe(OTf) <sub>2</sub> | CH <sub>2</sub> Cl <sub>2</sub>                              | 25     | 65                     | 88                  |
| 4              | Mg(OTf) <sub>2</sub> | CH <sub>2</sub> Cl <sub>2</sub>                              | 25     | 12                     | 9                   |
| 5              | Ni(OTf) <sub>2</sub> | CH <sub>2</sub> Cl <sub>2</sub>                              | 25     | 83                     | 28                  |
| 6              | Sc(OTf) <sub>3</sub> | CH <sub>2</sub> Cl <sub>2</sub>                              | 25     | 63                     | 0                   |
| 7              | Cu(OTf) <sub>2</sub> | CH <sub>2</sub> Cl <sub>2</sub>                              | 25     | 67                     | 3                   |
| 8              | Zn(OTf) <sub>2</sub> | CH <sub>2</sub> Cl <sub>2</sub>                              | 25     | 78                     | 92                  |
| 9 <sup>d</sup> | Zn(OTf) <sub>2</sub> | CH <sub>2</sub> Cl <sub>2</sub>                              | 25     | 75                     | 92                  |
| 10             | Zn(OTf) <sub>2</sub> | EtOAc                                                        | 25     | 64                     | 90                  |
| 11             | Zn(OTf) <sub>2</sub> | toluene                                                      | 25     | 42                     | 60                  |
| 12             | Zn(OTf) <sub>2</sub> | THF                                                          | 25     | 52                     | 89                  |
| 13             | Zn(OTf) <sub>2</sub> | 1,4-dioxane                                                  | 25     | 99                     | 88                  |
| 14             | Zn(OTf) <sub>2</sub> | DCE                                                          | 25     | 74                     | 88                  |
| 15             | Zn(OTf) <sub>2</sub> | CH <sub>3</sub> CN                                           | 25     | 24                     | 12                  |
| 16             | Zn(OTf) <sub>2</sub> | PhCl                                                         | 25     | 70                     | 89                  |
| 17             | Zn(OTf) <sub>2</sub> | CH <sub>2</sub> Cl <sub>2</sub> /1,4-dioxane<br>(v/v = 10:1) | 25     | 86                     | 90                  |
| 18             | Zn(OTf) <sub>2</sub> | CH <sub>2</sub> Cl <sub>2</sub> /1,4-dioxane<br>(v/v = 1:1)  | 25     | 90                     | 88                  |
| 19             | Zn(OTf) <sub>2</sub> | CH <sub>2</sub> Cl <sub>2</sub>                              | 40     | 90                     | 51                  |
| 20             | Zn(OTf) <sub>2</sub> | CH <sub>2</sub> Cl <sub>2</sub>                              | 10     | 58                     | 85                  |
| 21             | Zn(OTf) <sub>2</sub> | CH <sub>2</sub> Cl <sub>2</sub>                              | 0      | 29                     | 86                  |
| 22             | Zn(OTf) <sub>2</sub> | CH <sub>2</sub> Cl <sub>2</sub>                              | -10    | 22                     | 91                  |
| 23             | Zn(OTf) <sub>2</sub> | CH <sub>2</sub> Cl <sub>2</sub>                              | -20    | 13                     | 88                  |

<sup>a</sup>Reaction conditions: **1q** (0.10 mmol), **2d** (0.12 mmol), Lewis acid (10 mol%), **L10** (12 mol%), in solvent (2.0 mL) under N<sub>2</sub> for 16 h. <sup>b</sup>The yields of **(R)-3qd** was determined by <sup>1</sup>H NMR using CH<sub>2</sub>Br<sub>2</sub> as an internal standard. <sup>c</sup>The ee value was determined by chiral HPLC with hexane/2-propanol. <sup>d</sup>Under air.

**Table S6.** Investigate *N*-iminoisoquinolinium ylides **2** with different benzoyl protecting groups.<sup>a</sup>

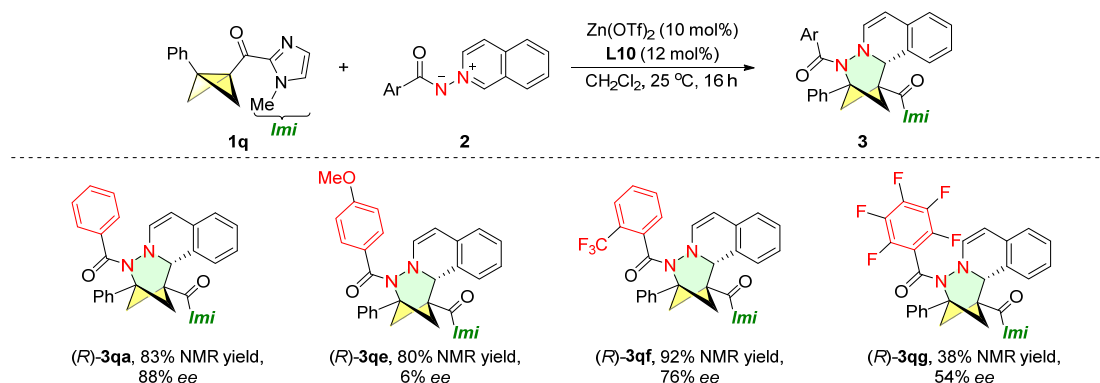

<sup>a</sup>Reaction conditions: **1q** (0.10 mmol, 1.0 equiv), **2** (0.12 mmol, 1.2 equiv), Zn(OTf)<sub>2</sub> (10 mol%) and L10 (12 mol%), CH<sub>2</sub>Cl<sub>2</sub> (2.0 mL), 25 °C, under N<sub>2</sub> for 16 h. The yields of **3** was determined by <sup>1</sup>H NMR with CH<sub>2</sub>Br<sub>2</sub> as an internal standard. The ee value was determined by chiral HPLC with hexane/2-propanol.

**Table S7.** Investigate BCBs **1** with different acyl imidazole groups.<sup>a</sup>

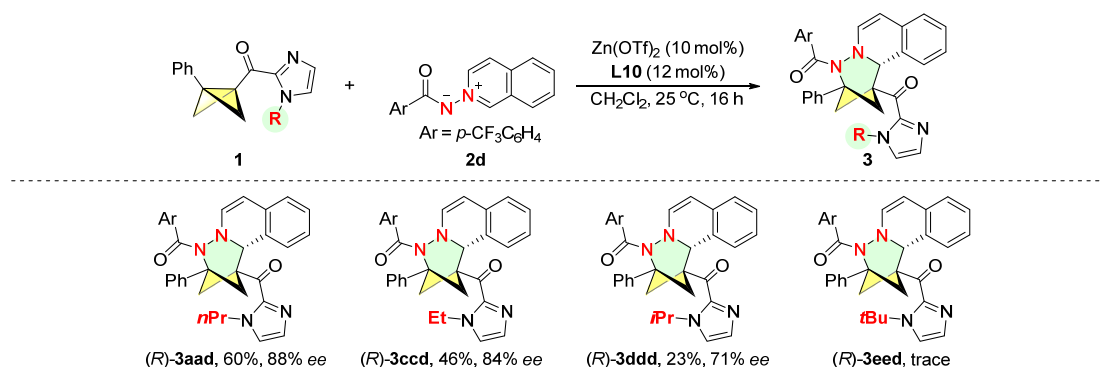

<sup>a</sup>Reaction conditions: **1** (0.10 mmol, 1.0 equiv), **2d** (0.12 mmol, 1.2 equiv), Zn(OTf)<sub>2</sub> (10 mol%) and L10 (12 mol%), CH<sub>2</sub>Cl<sub>2</sub> (2.0 mL), 25 °C, under N<sub>2</sub> for 16 h. The yields of **3** was determined by <sup>1</sup>H NMR with CH<sub>2</sub>Br<sub>2</sub> as an internal standard. The ee value was determined by chiral HPLC with hexane/2-propanol.

### 3 General Procedure for the (3+3) Cycloaddition Reactions

#### 3.1 General procedure for (3+3) cycloadditions of pyrazole amide substituted BCBs **1a-1f** and azomethine imine **2 (GP1)**

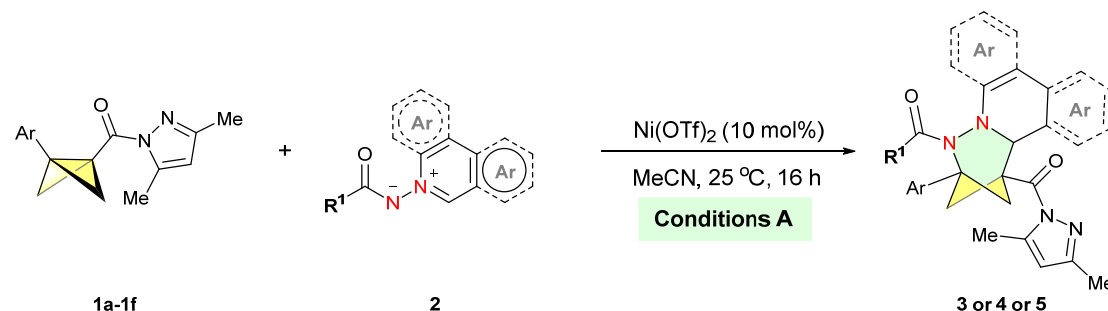

Under an atmosphere of N<sub>2</sub>, to a 25 mL oven-dried Schlenk tube were added the BCB **1** (0.20 mmol, 1.0 equiv), **2** (0.24 mmol, 1.2 equiv) and Ni(OTf)<sub>2</sub> (7.1 mg, 0.02 mmol) followed by 4.0 mL of anhydrous MeCN. The solution was stirred at 25 °C for 16 h till full conversion of BCB by TLC analysis. After the solvent was removed under reduced pressure, the residue was directly subjected to a column chromatography purification using PE/EtOAc (10:1, v/v) as the eluent, to afford the desired product **3 or 4 or 5**.

#### 3.2 General procedure for (3+3) cycloadditions of BCB ketones **1g-1p** and azomethine imine **2 (GP2)**

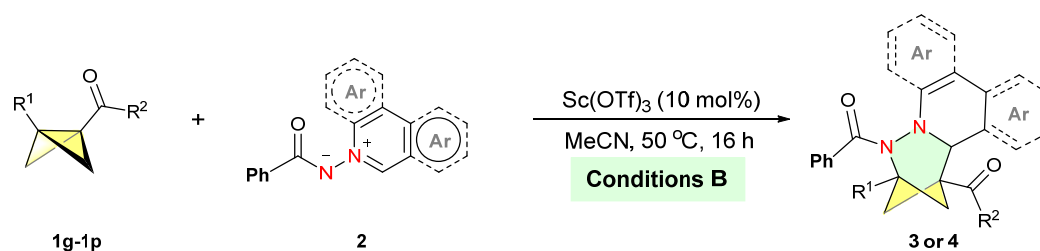

Under an atmosphere of N<sub>2</sub>, to a 25 mL oven-dried Schlenk tube were added the BCB **1** (0.20 mmol, 1.0 equiv), **2** (0.24 mmol, 1.2 equiv) and Sc(OTf)<sub>3</sub> (9.8 mg, 0.02 mmol) followed by 4.0 mL of anhydrous MeCN. The solution was stirred at 50 °C for 16 h till full conversion of BCBs by TLC analysis. After the solvent was removed under reduced pressure, the residue was directly subjected to a column chromatography purification using PE/EtOAc (10:1, v/v) as the eluent, to afford the desired product **3 or 4**.

### 3.3 General procedure for (3+3) cycloadditions of acyl imidazole substituted BCBs **1** and azomethine imines **2** (GP3)

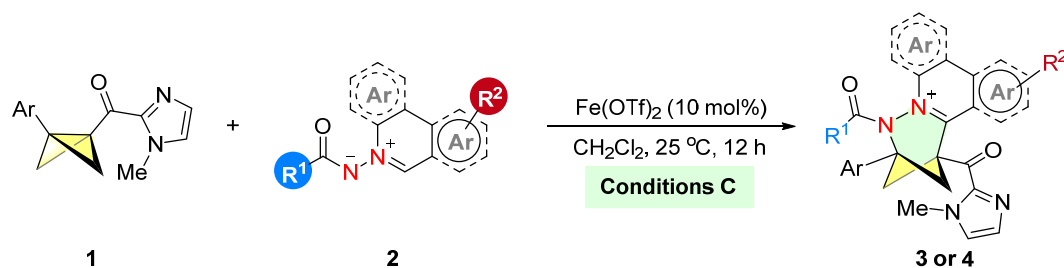

Under an atmosphere of  $\text{N}_2$ , to a 25 mL oven-dried Schlenk tube were added the BCB **1** (0.20 mmol, 1.0 equiv), **2** (0.24 mmol, 1.2 equiv) and  $\text{Fe}(\text{OTf})_2$  (7.1 mg, 0.02 mmol) followed by 4.0 mL of anhydrous  $\text{CH}_2\text{Cl}_2$ . The solution was stirred at  $25\text{ }^\circ\text{C}$  for 12 h till full conversion of BCBs by TLC analysis. After the solvent was removed under reduced pressure, the residue was directly subjected to a column chromatography purification using PE/EtOAc (3:1, v/v) as the eluent, to afford the desired product **3 or 4**.

### 3.4 General procedure for the enantioselective (3+3) cycloadditions (GP4)

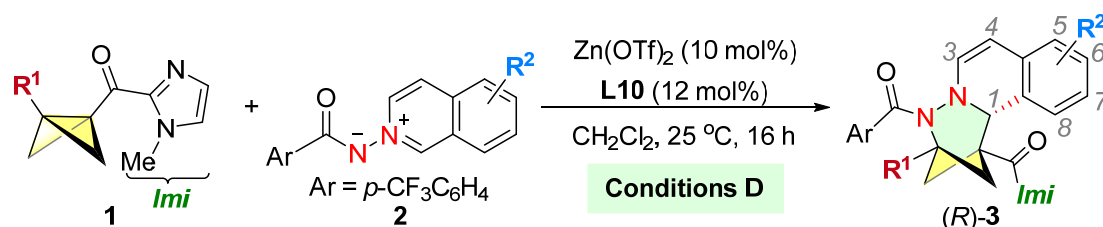

Under an atmosphere of  $\text{N}_2$ , to a 25 mL oven-dried Schlenk tube were added  $\text{Zn}(\text{OTf})_2$  (7.3 mg, 0.02 mmol) and **L10** (17.8 mg, 0.024 mmol), followed by 4.0 mL of anhydrous  $\text{CH}_2\text{Cl}_2$ . The solution was stirred at  $25\text{ }^\circ\text{C}$  for 0.5 h, and then the BCBs **1** (0.20 mmol, 1.0 equiv) and **2** (0.24 mmol, 1.2 equiv) were added. Then the resulting mixture was stirred at room temperature for 16 h till full conversion of BCBs by TLC analysis. After the solvent was removed under reduced pressure, the residue was directly subjected to a column chromatography purification using PE/EtOAc (4:1, v/v) as the eluent, to afford the desired product **3**.

#### 4 Scale-Up Experiment

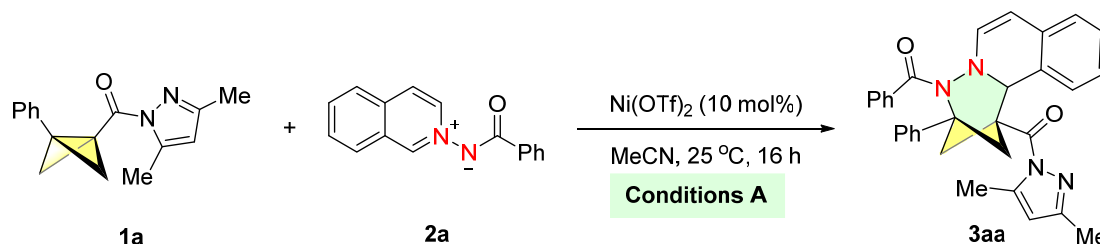

Under an atmosphere of  $\text{N}_2$ , to a 100 mL oven-dried Schlenk tube were added the BCB **1a** (252.3 mg, 1.0 mmol, 1.0 equiv), **2a** (297.9 mg, 1.2 mmol, 1.2 equiv) and  $\text{Ni(OTf)}_2$  (35.7 mg, 0.1 mmol) followed by 20.0 mL of anhydrous MeCN. The solution was stirred at 25 °C for 16 h till full conversion of **1a** by TLC analysis. After the solvent was removed under reduced pressure, the residue was directly subjected to a column chromatography purification using PE/EtOAc (10:1, v/v) as the eluent, to afford the desired product **3aa** (492.0 mg, 98% yield).

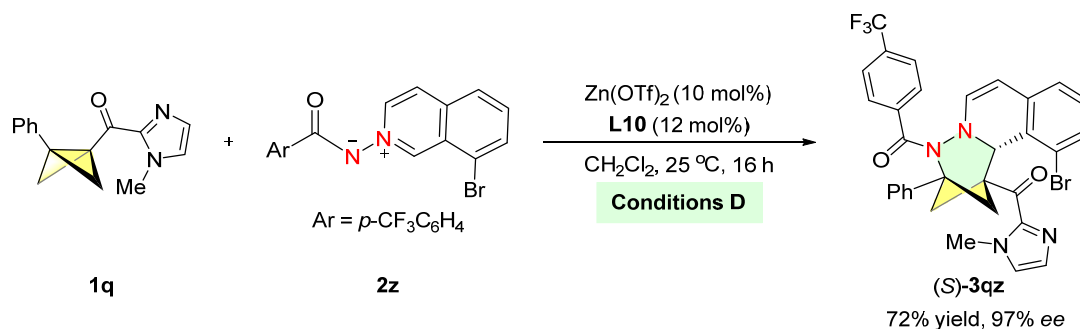

Under an atmosphere of  $\text{N}_2$ , to a 100 mL oven-dried Schlenk tube were added  $\text{Zn(OTf)}_2$  (36.4 mg, 0.10 mmol, 10 mol%) and **L10** (88.8 mg, 0.12 mmol, 12 mol%), followed by 25.0 mL of anhydrous  $\text{CH}_2\text{Cl}_2$ . The solution was stirred at 25 °C for 0.5 h, and then the BCB **1q** (238.3 mg, 1.0 mmol, 1.0 equiv) and **2z** (474.2 mg, 1.2 mmol, 1.2 equiv) were added. Then the resulting mixture was stirred at room temperature for 16 h till full conversion of **1q** by TLC analysis. After the solvent was removed under reduced pressure, the residue was directly subjected to a column chromatography purification using PE/EtOAc (4:1, v/v) as the eluent, to afford the desired product **(S)-3qz** (457.9 mg, 72% yield, 97% ee).



## 5 Sensitivity Assessment

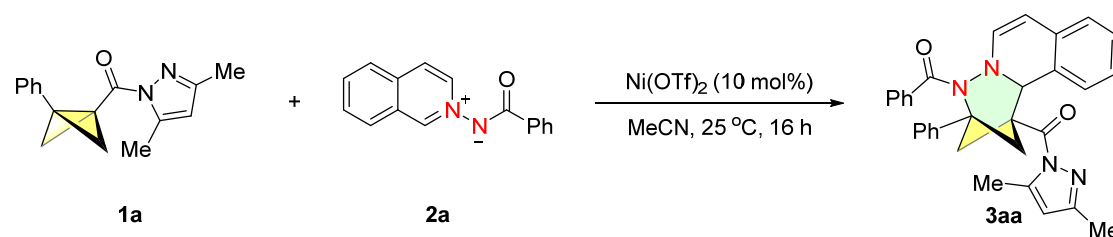

**Standard conditions:** Under an atmosphere of  $\text{N}_2$ , to a 25 mL oven-dried Schlenk tube were added the BCB **1a** (25.2 mg, 0.10 mmol, 1.0 equiv), the azomethine imine **2a** (29.8 mg, 0.12 mmol, 1.2 equiv), and  $\text{Ni(OTf)}_2$  (3.6 mg, 0.01 mmol) followed by 2.0 mL of anhydrous MeCN. The solution was stirred at 25 °C for 16 h. After the solvent was removed under reduced pressure,  $\text{CH}_2\text{Br}_2$  (0.10 mmol, 17.4 mg) was added as an internal standard, and the yield was determined by  $^1\text{H}$  NMR analysis of the crude mixture.

**Table S8. Sensitivity assessment**

| Entry | Description               | Deviation from Standard Condition          | Yield (%) | Deviation (%) |
|-------|---------------------------|--------------------------------------------|-----------|---------------|
| 1     | control                   | -                                          | 99        | -             |
| 2     | high <i>c</i>             | MeCN (1 mL)                                | 96        | -3            |
| 3     | Low <i>c</i>              | MeCN (4 mL)                                | 99        | 0             |
| 4     | high $\text{H}_2\text{O}$ | + $\text{H}_2\text{O}$ (10 $\mu\text{L}$ ) | 51        | -48           |
| 5     | low $\text{O}_2$          | degassed solvent                           | 99        | 0             |
| 6     | high $\text{O}_2$         | under air                                  | 99        | 0             |
| 7     | low <i>T</i>              | at 0 °C                                    | 10        | -89           |
| 8     | High <i>T</i>             | at 50 °C                                   | 99        | 0             |
| 9     | high <i>cat</i>           | $\text{Ni(OTf)}_2$ (20 mol%)               | 99        | 0             |
| 10    | low <i>cat</i>            | $\text{Ni(OTf)}_2$ (5 mol%)                | 99        | 0             |
| 11    | big scale                 | 1.0 mmol scale                             | 99        | 0             |

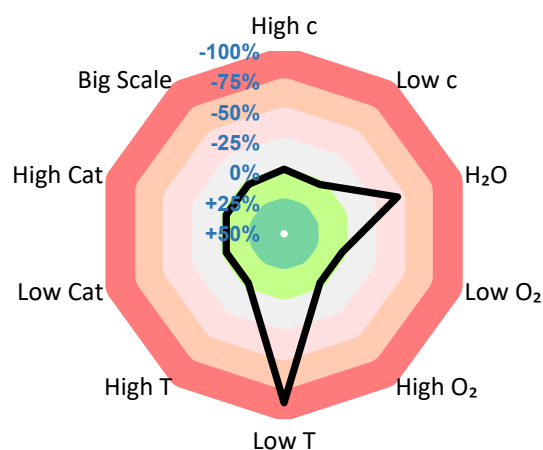

**Comment:** Condition-based sensitivity screening was performed,<sup>[3]</sup> revealing that low temperature inhibited the reaction. The reaction showed moderate sensitivity to moisture, with concentration, scale, catalyst loading, high temperature, and O<sub>2</sub> level having no significant impact on the reaction.

## 6 Unsuccessful Substrates and Control Experiments

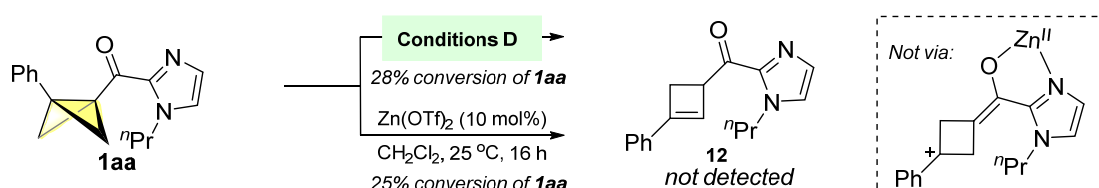

Under an atmosphere of N<sub>2</sub>, to a 25 mL oven-dried Schlenk tube were added Zn(OTf)<sub>2</sub> (3.6 mg, 0.010 mmol, 10 mol%) and L10 (8.9 mg, 0.012 mmol, 12 mol%), followed by 2 mL of anhydrous CH<sub>2</sub>Cl<sub>2</sub>. The solution was stirred at 25 °C for 0.5 h, and then the BCB **1aa** (26.6 mg, 0.1 mmol, 1.0 equiv) were added. Then the resulting mixture was stirred at room temperature for 16 h. The conversion of **1aa** and the yield of cyclobutene **12** was determined by <sup>1</sup>H NMR using CH<sub>2</sub>Br<sub>2</sub> as an internal standard.

For the version without **L10**, the procedure remains the same, simply omitting the addition of L10 after the Zn(OTf)<sub>2</sub> addition.

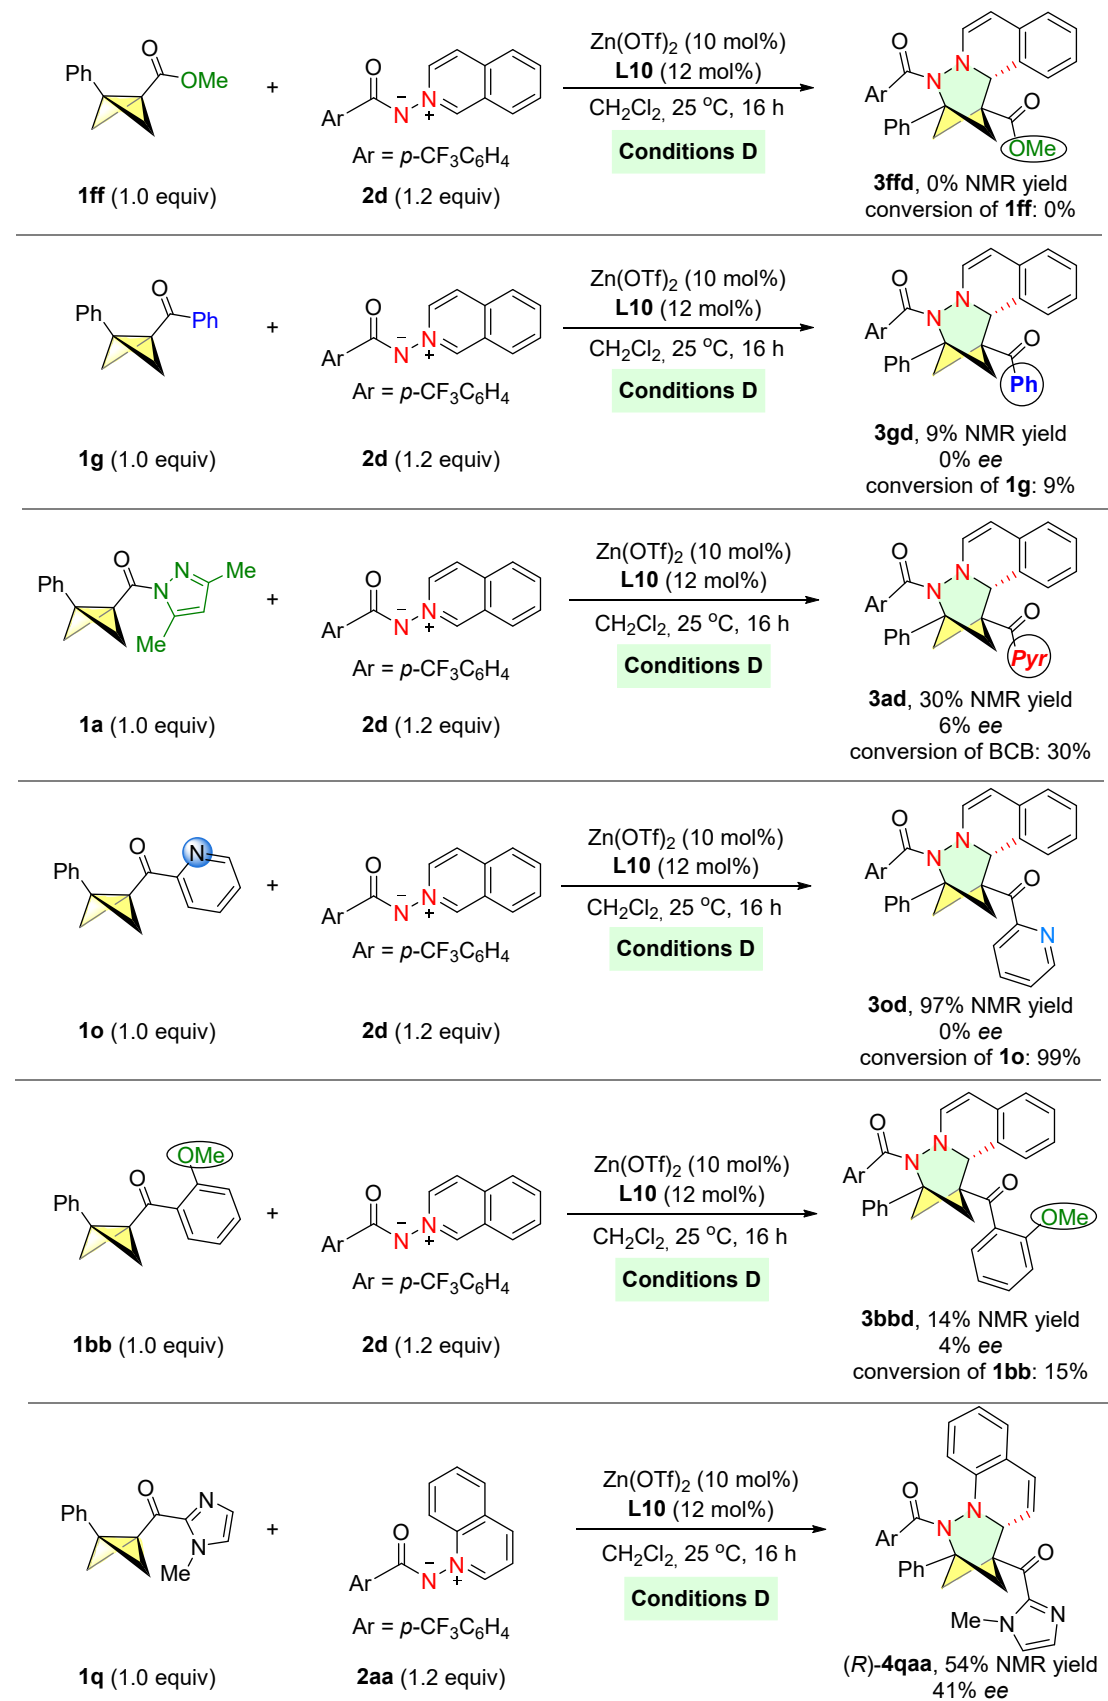

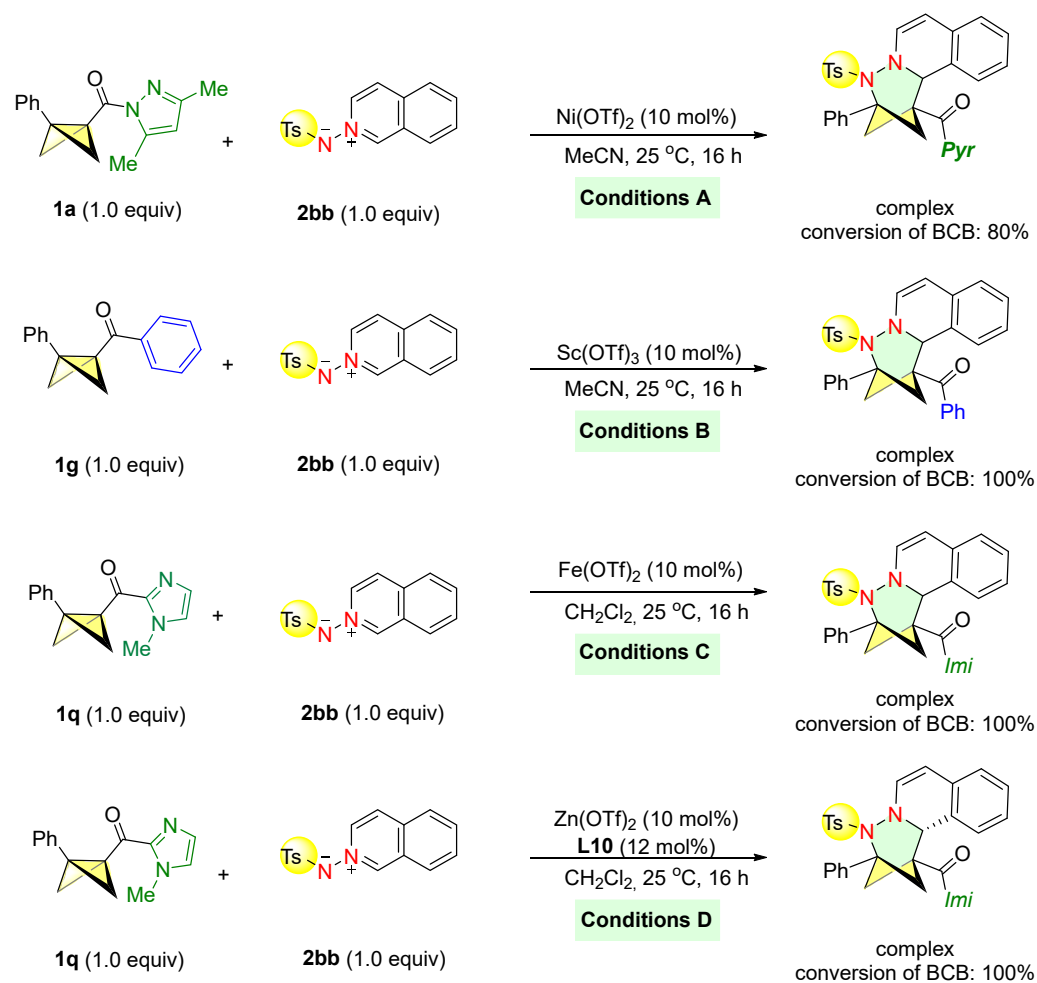

## 7 Non-Linear Effect Study

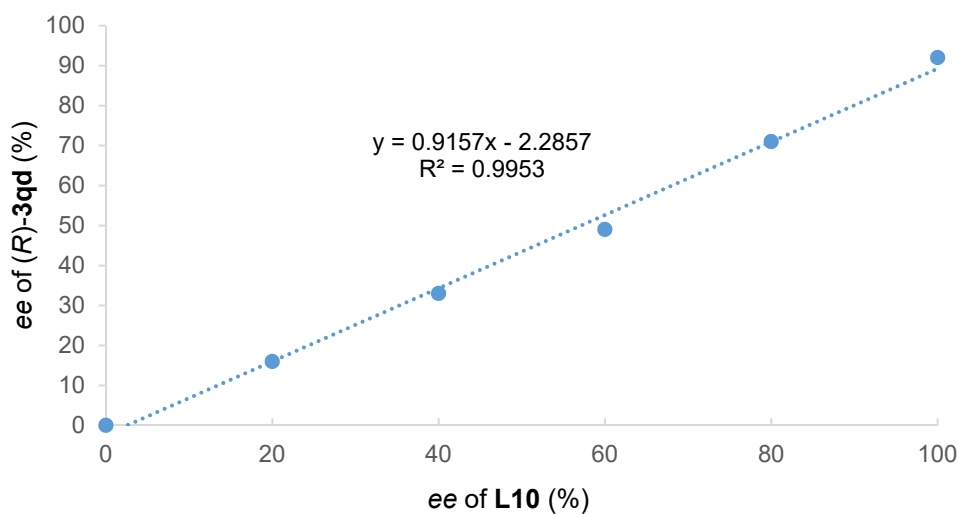

**Figure S1.** Non-linear effect study

**Table S9.** Tabulation of non-linear effects<sup>a</sup>

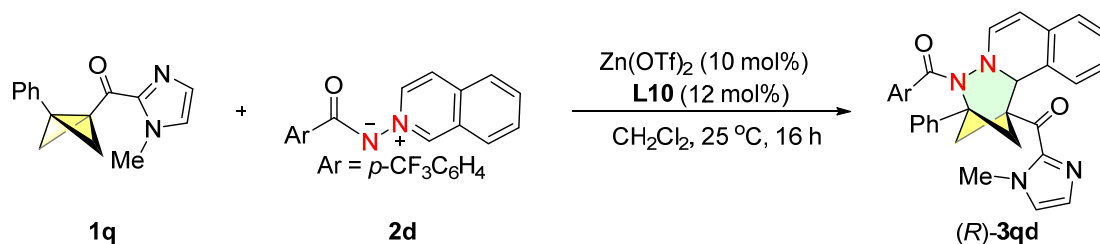

| Entry | L10 ee (%) <sup>b</sup> | (R)-3qd ee (%) <sup>b</sup> |
|-------|-------------------------|-----------------------------|
| 1     | 20                      | 16                          |
| 2     | 40                      | 33                          |
| 3     | 60                      | 49                          |
| 4     | 80                      | 71                          |
| 5     | 100                     | 92                          |

<sup>a</sup>Reaction conditions: **1q** (0.10 mmol, 1.0 equiv), **2d** (0.12 mmol, 1.2 equiv), Zn(OTf)<sub>2</sub> (10 mol%) and **L10** (12 mol%), CH<sub>2</sub>Cl<sub>2</sub> (2 mL), 25 °C, under N<sub>2</sub> for 16 h.

<sup>b</sup>Determined by chiral HPLC with hexane/2-propanol.

## 8 Synthetic Transformations

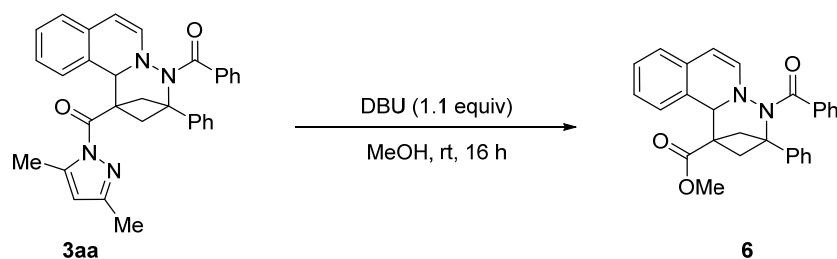

**Synthesis of (6):** To a solution of **3aa** (50.1 mg, 0.1 mmol, 1.0 equiv) in MeOH (2.0 mL) was added DBU (16.8 mg, 0.11 mmol, 1.1 equiv). The mixture was then stirred at room temperature for 16 h. Aqueous saturated  $\text{NH}_4\text{Cl}$  solution (2.0 mL) was added to quench the reaction. The mixture was extracted with EtOAc ( $3 \times 5$  mL). The combined organic layer was dried over anhydrous  $\text{MgSO}_4$ . Finally, the residue was directly subjected to a column chromatography purification (PE/EtOAc = 10:1) as the eluent to afford **6** (40.1 mg, 92% yield) as a white solid.

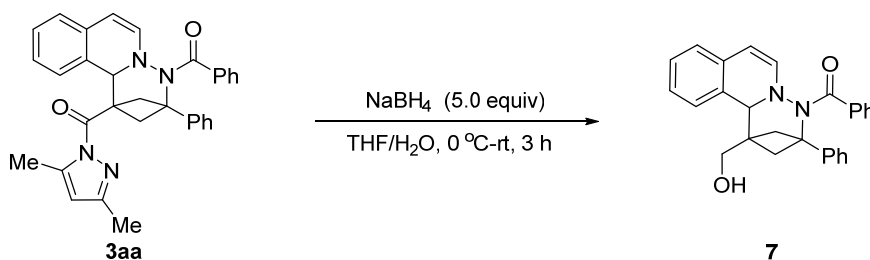

**Synthesis of (7):** To a solution of **3aa** (50.1 mg, 0.1 mmol, 1.0 equiv) in a mixed solvent of THF/ $\text{H}_2\text{O}$  (v/v = 4/1, 2.0 mL) at 0 °C was added  $\text{NaBH}_4$  (18.9 mg, 0.5 mmol, 5.0 equiv) in one portion. The reaction mixture was gradually warmed up to room temperature and stirred for 3 h and then quenched by addition of 5 mL saturated aqueous  $\text{NaHCO}_3$  solution. The mixture was extracted with EtOAc ( $3 \times 5$  mL). The combined organic layer was dried over anhydrous  $\text{MgSO}_4$ . Finally, the residue was directly subjected to a column chromatography purification (PE/EtOAc = 5:1) as the eluent to afford **7** (38.6 mg, 95% yield) as a white solid.

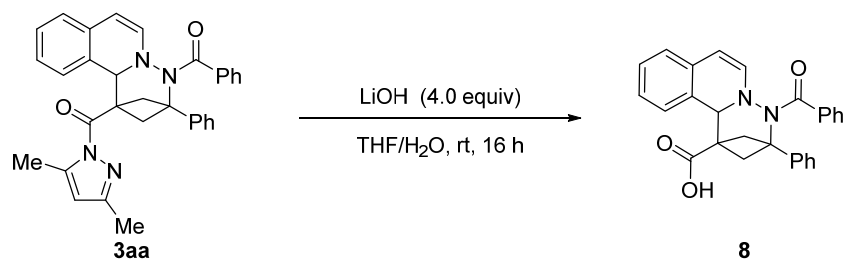

**Synthesis of (8):** To a solution of **3aa** (50.1 mg, 0.1 mmol, 1.0 equiv) in a mixed solvent of THF/H<sub>2</sub>O (v/v = 1/1, 2.0 mL) at room temperature was added lithium hydroxide (9.6 mg, 0.1 mmol, 4.0 equiv) in one portion. The mixture was stirred at room temperature for 16 h, then EtOAc (3 mL) was added to extract the reaction solution and the organic phase was removed. Acidified the aqueous phase with 1 N HCl to pH = 5~6, and extracted it with EtOAc (3 x 5 mL) and the combined organic phase was dried with MgSO<sub>4</sub>. Finally, the residue was directly subjected to a column chromatography purification (PE/EtOAc = 1:1) as the eluent to afford **8** (39.8 mg, 94% yield) as a yellow solid.

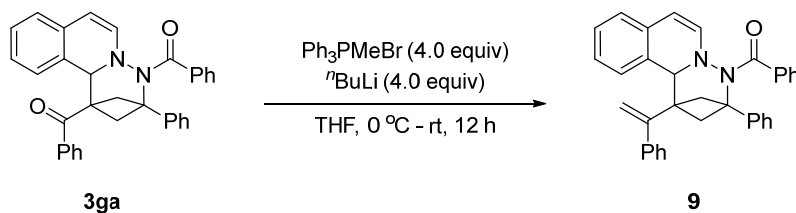

**Synthesis of (9):** To a solution of methyl triphenylphosphonium bromide (0.40 mmol, 142.9 mg, 4.0 equiv) in anhydrous THF (1.0 mL) at 0 °C was added *n*BuLi (0.25 mL, 1.6 M in hexane, 0.4 mmol, 4.0 equiv) in one portion. The resulting yellow suspension was stirred at 0 °C for 45 min, then a solution of **3ga** (0.10 mmol, 48.3 mg, 1.0 equiv) in THF (1.0 mL) added dropwise. The mixture was stirred at room temperature for 16 h. The reaction mixture was quenched with water (5 mL), extracted with EtOAc (3 x 5 mL), and the combined organic phase was dried with MgSO<sub>4</sub>. Finally, the residue was directly subjected to a column chromatography purification (PE/EtOAc = 10:1) as the eluent to afford **9** (44.8 mg, 93% yield) as a white solid.

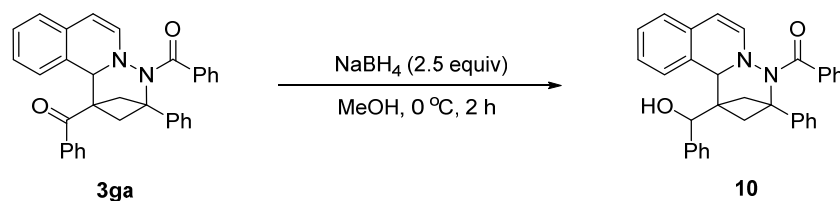

**Synthesis of (10):** To a solution of **3ga** (0.10 mmol, 48.3 mg, 1.0 equiv) in the  $\text{MeOH}$  (2.0 mL) was added  $\text{NaBH}_4$  (9.5 mg, 0.25 mmol, 2.5 equiv) at  $0\text{ }^\circ\text{C}$ . and stirred 2 h. Then aqueous saturated  $\text{NH}_4\text{Cl}$  solution (5 mL) was added to quench the reaction. The aqueous phase was extracted with  $\text{EtOAc}$  (3 x 5 mL). The combined organic phases were washed by brine and dried over  $\text{MgSO}_4$  and concentrated under reduced pressure after filtration. Finally, the residue was directly subjected to a column chromatography purification ( $\text{PE/EtOAc} = 5:1$ ) as the eluent to afford **10** (45.1 mg, 93% yield (yields are combined isolated material), 5:1 *dr*) as a white solid.

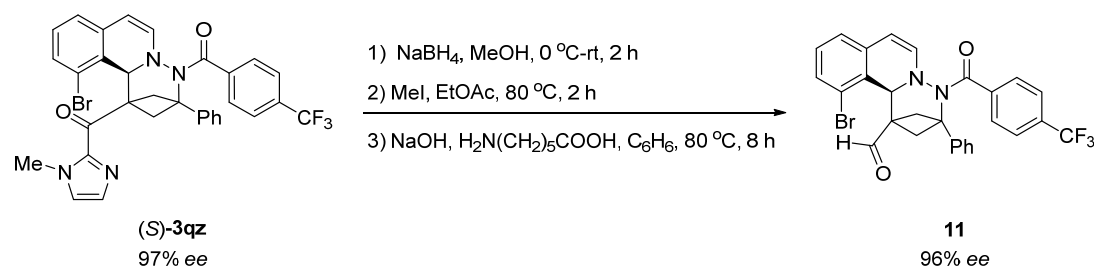

**Synthesis of (11):** To a solution of **(S)-3qz** (0.20 mmol, 126.8 mg, 1.0 equiv) in the  $\text{MeOH}$  (4.0 mL) was added  $\text{NaBH}_4$  (18.9 mg, 0.50 mmol, 2.5 equiv) at  $0\text{ }^\circ\text{C}$ , and stirred 2 h. Then aqueous saturated  $\text{NH}_4\text{Cl}$  solution (5 mL) was added to quench the reaction. The aqueous phase was extracted with  $\text{EtOAc}$  (3 x 5 mL). The combined organic phases were washed by brine and dried over  $\text{MgSO}_4$  and concentrated under reduced pressure after filtration. The residue was directly subjected to a column chromatography purification to afford the intermediate. The intermediate in ethyl acetate (4.0 mL) was refluxed for 2 h in the presence of methyl iodide (0.2 mL, 3.2 mmol, 16.0 equiv), followed by evaporation of the volatile portion, to give a crystalline residue. And then 6-aminohexanoic acid (104 mg, 0.8 mmol, 4 equiv), 1 N  $\text{NaOH}$  (1 mL) and benzene (4 mL) were added. The two-layer solution was stirred at  $80\text{ }^\circ\text{C}$  for 8 h. The aqueous phase was extracted with  $\text{EtOAc}$  (3 x 5 mL). The combined organic



phases were washed by brine and dried over  $\text{MgSO}_4$  and concentrated under reduced pressure after filtration. Finally, the residue was directly subjected to a column chromatography purification (PE/EtOAc = 8:1) as the eluent to afford **11** (70.8 g, 64% yield over 3 steps, 96% ee) as a white solid.

## 9 General Procedure for the Synthesis of New Bicyclobutanes (GP5)

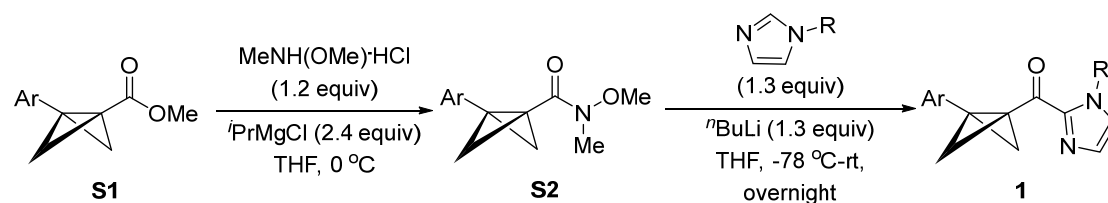

BCB esters **S1** were prepared according to literature procedures.<sup>[1]</sup> Weinreb amide derived BCBs **S2** were synthesized as following: An oven-dried 100 mL round bottom flask equipped with a stir bar was cooled under vacuum. After backfilled with  $\text{N}_2$  (x 3) and capped with a septum, BCB esters **S1** (5.00 mmol, 1.00 equiv) and THF (25 mL) were added. The reaction was cooled to 0 °C.  $\text{MeNH(OMe)HCl}$  (585 mg, 6 mmol, 1.2 equiv) and  $^i\text{PrMgCl}$  (6.0 mL, 2.0 M in THF, 12.0 mmol, 2.4 equiv) were sequentially added to the solution. After stirred at the same temperature for 12 h, the reaction was quenched by saturated  $\text{NH}_4\text{Cl}$  solution (20 mL). The aqueous layer was extracted with EtOAc (3 x 10 mL). The combined organic layers were washed with brine (25 mL), dried over anhydrous  $\text{MgSO}_4$ , filtered and concentrated by rotary evaporation. The crude Weinreb amide derived BCBs **S2** was directly used in next reaction.

An oven-dried 100 mL round bottom flask equipped with a stir bar was cooled under vacuum. After backfilled with  $\text{N}_2$  (x 3) and capped with a septum, *N*-substituted imidazole derivatives (6.5 mmol, 1.3 equiv) and THF (20 mL) were added. The reaction was cooled to -78 °C.  $^n\text{BuLi}$  (2.6 mL, 2.5 M in THF, 6.5 mmol, 1.3 equiv) was added to the solution. After stirred at the same temperature for 20 min, **S2** dissolved in THF (5 mL) was added. Next, the reaction was warm to room temperature and stirred overnight. Then, the reaction was quenched by saturated  $\text{NH}_4\text{Cl}$  solution (20 mL). The aqueous layer was extracted with EtOAc (3 x 10 mL). The combined organic layers

were washed with brine (25 mL), dried over anhydrous  $\text{MgSO}_4$ , filtered and concentrated by rotary evaporation. The residue was purified by flash chromatography on silica gel (petroleum ether/EtOAc = 5/1) to afford a new kind of BCB **1**.

## 10 General Procedure for the Synthesis of New Bicyclobutanes Ketones (GP6)

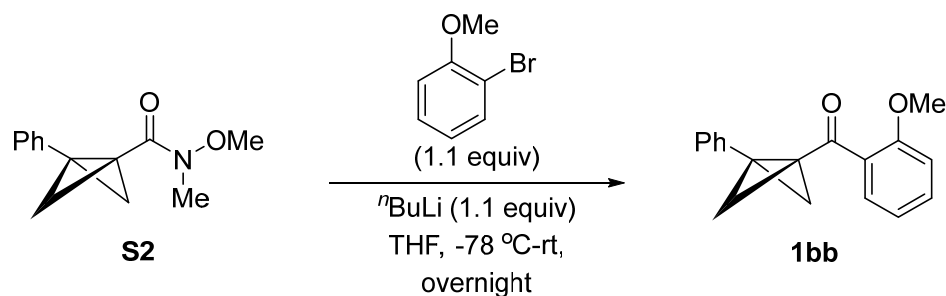

An oven-dried 100 mL round bottom flask equipped with a stir bar was cooled under vacuum. After backfilled with  $\text{N}_2$  (x 3) and capped with a septum, aryl Bromides (5.5 mmol, 1.1 equiv) and THF (20 mL) were added. The reaction was cooled to  $-78\text{ }^\circ\text{C}$ .  $n\text{BuLi}$  (2.6 mL, 2.5 M in THF, 5.5 mmol, 1.1 equiv) was added to the solution. After stirred at the same temperature for 30 min, purified **S2** dissolved in THF (5 mL) was added. Next, the reaction was warm to room temperature and stirred overnight. Then, the reaction was quenched by saturated  $\text{NH}_4\text{Cl}$  solution (20 mL). The aqueous layer was extracted with EtOAc (3 x 10 mL). The combined organic layers were washed with brine (25 mL), dried over anhydrous  $\text{MgSO}_4$ , filtered and concentrated by rotary evaporation. The residue was purified by flash chromatography on silica gel (petroleum ether/EtOAc = 15/1) to afford a new kind of BCB ketones **1bb**.

## 11 Characterization Data of New BCBs and Products

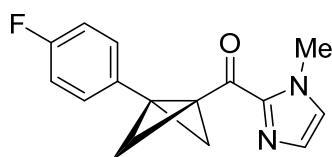**1u**

$C_{15}H_{13}FN_2O$   
 M = 256.28 g/mol

**(3-(4-fluorophenyl)bicyclo[1.1.0]butan-1-yl)(1-methyl-1H-imidazol-2-yl)methanone: (1u)**

Prepared from methyl 3-(4-fluorophenyl)bicyclo[1.1.0]butane-1-carboxylate (1.03 g, 5 mmol, 1.0 equiv) according to the **GP5**. Purification by flash chromatography on silica gel afforded **1u** as a white solid (0.64 g, 50% yield over 2 steps).

**1u**:  $R_f$  = 0.30 (petroleum ether/EtOAc = 5/1). Mp: 109-111 °C.  **$^1H$  NMR** (400 MHz,  $CDCl_3$ ):  $\delta$  7.27-7.23 (m, 2H), 7.07 (s, 1H), 6.94-6.88 (m, 3H), 3.68 (s, 3H), 3.61 (s, 2H), 1.89 (s, 2H) ppm.  **$^{13}C$  NMR** (100 MHz,  $CDCl_3$ ):  $\delta$  185.4, 162.1 (d,  $J$  = 244.9 Hz), 143.4, 129.2 (d,  $J$  = 3.0 Hz), 128.9, 127.6 (d,  $J$  = 8.0 Hz), 125.9, 115.3 (d,  $J$  = 21.6 Hz), 39.7, 38.1, 35.9, 32.5 ppm.  **$^{19}F$  NMR** (376 MHz,  $CDCl_3$ )  $\delta$  -114.96 ppm. **HRMS** (ESI)  $m/z$ :  $[M+NH_4]^+$  calcd. for  $C_{15}H_{17}N_3O$ : 274.1350; found: 274.1358.

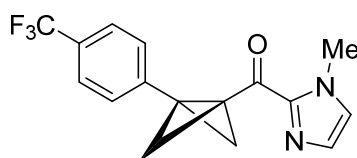**1v**

$C_{16}H_{13}F_3N_2O$   
 M = 306.29 g/mol

**(1-methyl-1H-imidazol-2-yl)(3-(4-(trifluoromethyl)phenyl)bicyclo[1.1.0]butan-1-yl)methanone (1v):**

Prepared from methyl 3-(4-(trifluoromethyl)phenyl)bicyclo[1.1.0]butane-1-carboxylate (1.28 g, 5 mmol, 1.0 equiv) according to the **GP5**. Purification by flash chromatography on silica gel afforded **1v** as a white solid (0.55 g, 36% yield over 2 steps).

**1v**:  $R_f$  = 0.40 (petroleum ether/EtOAc = 5/1). Mp: 76-78 °C.  **$^1H$  NMR** (400 MHz,  $CDCl_3$ ):  $\delta$  7.38 (d,  $J$  = 8.4 Hz, 2H) 7.30 (d,  $J$  = 8.0 Hz, 2H), 7.00 (s, 1H), 6.81 (s, 1H), 3.61-3.60 (m, 5H), 1.84 (s, 2H) ppm.  **$^{13}C$  NMR** (100 MHz,  $CDCl_3$ ):  $\delta$  184.8, 143.2, 138.1, 128.9, 128.8 (q,  $J$  = 32.3 Hz), 125.2 (q,  $J$  = 3.8 Hz), 124.1 (q,  $J$  = 270.1 Hz), 126.2, 126.2,

38.5, 38.1, 35.9, 33.5 ppm.  $^{19}\text{F}$  NMR (376 MHz,  $\text{CDCl}_3$ )  $\delta$  -62.48 ppm. HRMS (ESI)  $m/z$ :  $[\text{M}+\text{H}]^+$  calcd. for  $\text{C}_{16}\text{H}_{14}\text{F}_3\text{N}_2\text{O}$ : 307.1053; found: 307.1046.

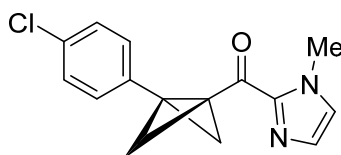**1y**

$\text{C}_{15}\text{H}_{13}\text{ClN}_2\text{O}$   
M = 272.73 g/mol

(3-(4-chlorophenyl)bicyclo[1.1.0]butan-1-yl)(1-methyl-1H-imidazol-2-yl)methanone (**1y**): methyl 3-(4-chlorophenyl)bicyclo[1.1.0]butane-1-carboxylate (1.11 g, 5 mmol, 1.0 equiv) according to the **GP5**. Purification by flash chromatography on silica gel afforded **1y** as a white solid (0.69 g, 51% yield over 2 steps).

**1y**:  $R_f$  = 0.50 (petroleum ether/EtOAc = 5/1). Mp: 94-96 °C.  $^1\text{H}$  NMR (600 MHz,  $\text{CDCl}_3$ ):  $\delta$  7.22-7.20 (m, 2H),  $\delta$  7.18-7.16 (m, 2H), 7.06 (d,  $J$  = 0.6 Hz, 1H), 6.87 (s, 1H), 3.68 (s, 3H), 3.62 (s, 2H), 1.87 (s, 2H).  $^{13}\text{C}$  NMR (100 MHz,  $\text{CDCl}_3$ ):  $\delta$  185.0, 143.2, 132.7, 132.1, 128.7, 128.35, 127.23, 125.94, 39.27, 37.98, 35.86, 32.90 ppm. HRMS (ESI)  $m/z$ :  $[\text{M}+\text{H}]^+$  calcd. for  $\text{C}_{15}\text{H}_{14}\text{ClN}_2\text{O}$ : 273.0789; found: 273.0784.

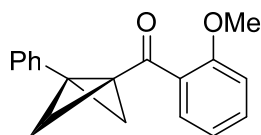**1bb**

$\text{C}_{18}\text{H}_{16}\text{O}_2$   
M = 264.32 g/mol

(2-methoxyphenyl)(3-phenylbicyclo[1.1.0]butan-1-yl)methanone (**1bb**): Prepared from *N*-methoxy-*N*-methyl-3-phenylbicyclo[1.1.0]butane-1-carboxamide (1.09 g, 5 mmol, 1.0 equiv) according to the **GP6**. Purification by flash chromatography on silica gel afforded **1bb** as a white solid (0.75 g, 57%).

**1bb**:  $R_f$  = 0.30 (petroleum ether/EtOAc = 7/1). Mp: 109-111 °C.  $^1\text{H}$  NMR (400 MHz,  $\text{CDCl}_3$ ):  $\delta$  7.31-7.25 (m, 4H), 7.14-7.12 (m, 2H), 6.83 (d,  $J$  = 8.4 Hz, 1H), 6.73 (t,  $J$  = 7.6 Hz, 1H), 6.52-6.50 (m, 1H), 3.69 (s, 3H), 2.97 (s, 2H), 1.81 (s, 2H) ppm.  $^{13}\text{C}$  NMR

(100 MHz, CDCl<sub>3</sub>):  $\delta$  197.8, 157.3, 133.1, 131.6, 129.0, 128.2, 127.9, 127.0, 125.8, 120.1, 110.9, 55.5, 39.9, 36.8, 34.2 ppm. **HRMS** (ESI)  $m/z$ : [M+H]<sup>+</sup> calcd. for C<sub>18</sub>H<sub>17</sub>O<sub>2</sub>: 265.1223; found: 265.1222.

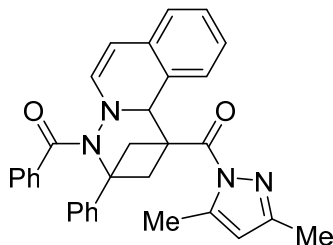**3aa**

C<sub>32</sub>H<sub>28</sub>N<sub>4</sub>O<sub>2</sub>  
M = 500.60 g/mol

**(4-benzoyl-3-phenyl-3,4-dihydro-2H-1,3-methanopyridazino[6,1-a]isoquinolin-1(11bH)-yl)(3,5-dimethyl-1H-pyrazol-1-yl)methanone (3aa)**: Prepared from (3,5-dimethyl-1H-pyrazol-1-yl)(3-phenylbicyclo[1.1.0]butan-1-yl)methanone (**1a**, 50.5 mg, 0.20 mmol) and benzoyl(isoquinolin-2-ium-2-yl)amide (**2a**, 59.6 mg, 0.24 mmol) according to the **GP1** at rt for 16 h. Purification by flash chromatography on silica gel using petroleum ether/EtOAc (10/1) afforded **3aa** as a white solid (99.1 mg, 99% yield).

**3aa**:  $R_f$  = 0.2 (petroleum ether/EtOAc = 10/1). Mp: 115-117 °C. **<sup>1</sup>H NMR** (400 MHz, CDCl<sub>3</sub>):  $\delta$  7.70 (d,  $J$  = 6.4 Hz, 2H), 7.43 (d,  $J$  = 7.6 Hz, 2H), 7.40-7.33 (m, 5H), 7.23-7.21 (m, 1H), 6.97 (t,  $J$  = 7.6 Hz, 1H), 6.86 (d,  $J$  = 7.6 Hz, 1H), 6.79 (d,  $J$  = 7.2 Hz, 1H), 6.61 (t,  $J$  = 7.6 Hz, 1H), 5.95 (s, 1H), 5.79 (d,  $J$  = 7.6 Hz, 1H), 5.59 (s, 1H), 5.31 (d,  $J$  = 7.6 Hz, 1H), 3.74 (t,  $J$  = 10.0 Hz, 1H), 3.42 (d,  $J$  = 10.8 Hz, 1H), 3.25 (t,  $J$  = 10.0 Hz, 1H), 2.43 (d,  $J$  = 11.2 Hz, 1H), 2.30 (s, 3H), 2.26 (s, 3H) ppm. **<sup>13</sup>C NMR** (100 MHz, CDCl<sub>3</sub>):  $\delta$  175.0, 171.7, 152.8, 144.4, 142.0, 140.8, 135.6, 131.2, 130.7, 128.6, 128.2, 127.8, 126.9, 126.2, 125.4, 124.8, 124.5, 111.0, 100.7, 68.5, 68.3, 56.7, 48.7, 41.7, 14.0, 13.9 ppm. **HRMS** (ESI)  $m/z$ : [M+Na]<sup>+</sup> calcd. for C<sub>34</sub>H<sub>28</sub>N<sub>4</sub>O<sub>2</sub>Na: 523.2104; found: 523.2108.

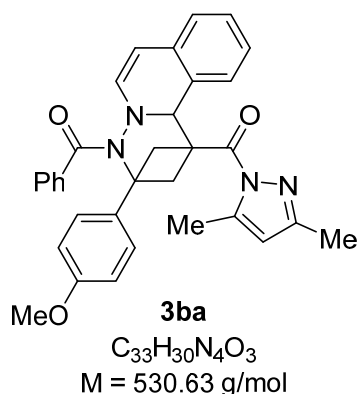

**(4-benzoyl-3-(4-methoxyphenyl)-3,4-dihydro-2H-1,3-methanopyridazino[6,1-a]isoquinolin-1(11bH)-yl)(3,5-dimethyl-1H-pyrazol-1-yl)methanone (3ba):** Prepared from (3,5-dimethyl-1H-pyrazol-1-yl)(3-(4-methoxyphenyl)bicyclo[1.1.0]butan-1-yl)methanone (**1b**, 56.5 mg, 0.20 mmol) and benzoyl(isoquinolin-2-ium-2-yl)amide (**2a**, 59.6 mg, 0.24 mmol) according to the **GP1** at rt for 16 h. Purification by flash chromatography on silica gel using petroleum ether/EtOAc (5/1) afforded **3ba** as a white solid (105.1 mg, 99% yield).

**3ba:**  $R_f = 0.3$  (petroleum ether/EtOAc = 5/1). Mp: 128-130 °C.  **$^1H$  NMR** (400 MHz,  $CDCl_3$ ):  $\delta$  7.71 (d,  $J = 6.8$  Hz, 2H), 7.42-7.34 (m, 3H), 7.30-7.25 (m, 1H), 7.03 (d,  $J = 7.8$  Hz, 1H), 6.99-6.95 (m, 2H), 6.85 (d,  $J = 7.6$  Hz, 1H), 6.80-6.76 (m, 2H), 6.61 (t,  $J = 7.6$  Hz, 1H), 5.95 (s, 1H), 5.78 (d,  $J = 5.6$  Hz, 1H), 5.58 (s, 1H), 5.31 (d,  $J = 7.6$  Hz, 1H), 3.81 (s, 3H), 3.71 (t,  $J = 10.0$  Hz, 1H), 3.40 (d,  $J = 10.8$  Hz, 1H), 3.22 (t,  $J = 10.0$  Hz, 1H), 2.42 (d,  $J = 11.6$  Hz, 1H), 2.30 (s, 3H), 2.27 (s, 3H) ppm.  **$^{13}C$  NMR** (100 MHz,  $CDCl_3$ ):  $\delta$  175.0, 171.7, 159.6, 152.8, 144.4, 143.6, 140.7, 135.6, 131.2, 130.7, 129.3, 128.6, 128.2, 127.9, 126.2, 125.4, 124.5, 117.1, 111.8, 111.0, 100.7, 68.4, 68.3, 56.6, 55.2, 48.8, 41.8, 14.0, 13.9 ppm. **HRMS** (ESI)  $m/z$ :  $[M+Na]^+$  calcd. for  $C_{33}H_{30}N_4O_3Na$ : 553.2210; found: 553.2212.

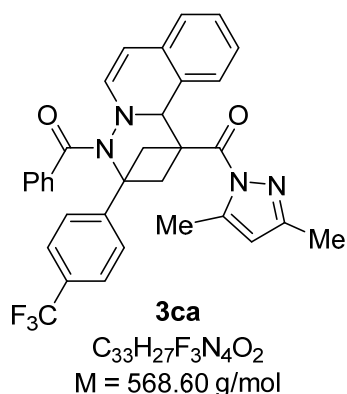

(4-benzoyl-3-(4-(trifluoromethyl)phenyl)-3,4-dihydro-2H-1,3-methanopyridazino[6,1-a]isoquinolin-1(11bH)-yl)(3,5-dimethyl-1H-pyrazol-1-yl)methanone: (**3ca**) Prepared from (3,5-dimethyl-1H-pyrazol-1-yl)(3-(4-(trifluoromethyl)phenyl)bicyclo[1.1.0]butan-1-yl)methanone (**1c**, 64.0 mg, 0.2 mmol) and benzoyl(isoquinolin-2-ium-2-yl)amide (**2a**, 59.6 mg, 0.24 mmol) according to the **GP1** at rt for 16 h. Purification by flash chromatography on silica gel using petroleum ether/EtOAc (10/1) afforded **3ca** as a yellow solid (88.2 mg, 78% yield).

**3ca**:  $R_f$  = 0.3 (petroleum ether/EtOAc = 10/1). Mp: 244-246 °C.  $^1H$  NMR (400 MHz,  $CDCl_3$ ):  $\delta$  7.72-7.70 (m, 2H), 7.61 (d,  $J$  = 8.0 Hz, 2H), 7.54 (d,  $J$  = 8.0 Hz, 2H), 7.43-7.34 (m, 3H), 6.98 (t,  $J$  = 7.6 Hz, 1H), 6.86 (d,  $J$  = 8.0 Hz, 1H), 6.81 (d,  $J$  = 7.6 Hz, 1H), 6.63 (t,  $J$  = 7.6 Hz, 1H), 5.95 (s, 1H), 5.80 (d,  $J$  = 8.0 Hz, 1H), 5.60 (s, 1H), 5.35 (d,  $J$  = 7.6 Hz, 1H), 3.76 (t,  $J$  = 10.6 Hz, 1H), 3.42 (d,  $J$  = 10.4 Hz, 1H), 3.24 (t,  $J$  = 10.0 Hz, 1H), 2.42 (d,  $J$  = 11.6 Hz, 1H), 2.30 (s, 3H), 2.26 (s, 3H) ppm.  $^{13}C$  NMR (100 MHz,  $CDCl_3$ ):  $\delta$  175.1, 171.4, 153.0, 145.8, 144.5, 140.5, 135.1, 131.03, 130.96, 129.0 (q,  $J$  = 32 Hz), 128.7, 128.3, 128.1, 127.9, 126.2, 125.6, 125.3 (q,  $J$  = 4 Hz), 125.2, 124.6, 124.2 (q,  $J$  = 270 Hz), 111.1, 101.1, 68.3, 68.1, 56.6, 48.7, 41.5, 14.0, 13.9 ppm.  $^{19}F$  NMR (376 MHz,  $CDCl_3$ )  $\delta$  -62.35 ppm. HRMS (ESI)  $m/z$ :  $[M+H]^+$  calcd. for  $C_{33}H_{28}F_3N_4O_2$ : 569.2159; found: 569.2150.

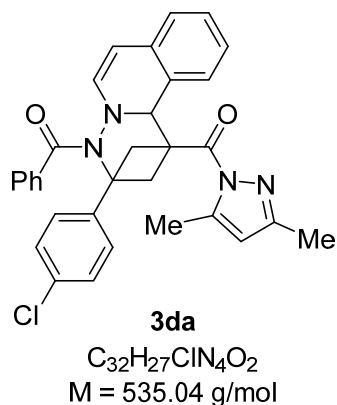

**(4-benzoyl-3-phenyl-3,4-dihydro-2H-1,3-methanopyridazino[6,1-a]isoquinolin-1(11bH)-yl)(3,5-dimethyl-1H-pyrazol-1-yl)methanone (3da):** Prepared from (3-(4-chlorophenyl)bicyclo[1.1.0]butan-1-yl)(3,5-dimethyl-1H-pyrazol-1-yl)methanone (**1d**, 57.4 mg, 0.20 mmol) and benzoyl(isoquinolin-2-ium-2-yl)amide (**2a**, 59.6 mg, 0.24 mmol) according to the **GP1** at rt for 16 h. Purification by flash chromatography on silica gel using petroleum ether/EtOAc (10/1) afforded **3da** as a white solid (106.9 mg, 99% yield).

**3da:**  $R_f$  = 0.2 (petroleum ether/EtOAc = 10/1). Mp: 129-131 °C. **<sup>1</sup>H NMR** (400 MHz,  $CDCl_3$ ):  $\delta$  7.70 (d,  $J$  = 6.7 Hz, 2H), 7.41-7.30 (m, 7H), 6.98 (t,  $J$  = 7.6 Hz, 1H), 6.84-6.79 (m, 2H), 6.62 (t,  $J$  = 7.6 Hz, 1H), 5.95 (s, 1H), 5.79 (s, 1H), 5.57 (s, 1H), 5.32 (d,  $J$  = 7.6 Hz, 1H), 3.73 (t,  $J$  = 10.0 Hz, 1H), 3.36 (d,  $J$  = 10.8 Hz, 1H), 3.23 (t,  $J$  = 9.6 Hz, 1H), 2.39 (d,  $J$  = 11.6 Hz, 1H), 2.30 (s, 3H), 2.26 (s, 3H) ppm. **<sup>13</sup>C NMR** (100 MHz,  $CDCl_3$ ):  $\delta$  175.1, 171.5, 152.9, 144.4, 140.6, 135.3, 132.6, 131.1, 130.8, 128.6, 128.4, 128.2, 128.1, 127.9, 126.3, 126.2, 125.5, 124.5, 111.0, 100.9, 68.2, 68.0, 56.6, 48.7, 41.6, 14.0, 13.9 ppm. **HRMS** (ESI)  $m/z$ :  $[M+Na]^+$  calcd. for  $C_{32}H_{27}ClN_4O_2Na$ : 557.1715; found: 557.1724.



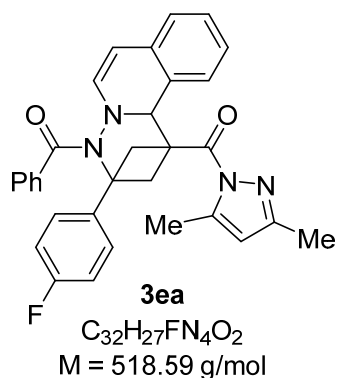

(4-benzoyl-3-(4-fluorophenyl)-3,4-dihydro-2H-1,3-methanopyridazino[6,1-a]isoquinolin-1(11bH)-yl)(3,5-dimethyl-1H-pyrazol-1-yl)methanone (**3ea**): Prepared from (3-(4-fluorophenyl)bicyclo[1.1.0]butan-1-yl)methanone (**1e**, 54.6 mg, 0.20 mmol) and benzoyl(isoquinolin-2-ium-2-yl)amide (**2a**, 59.6 mg, 0.24 mmol) according to the **GP1** at rt for 16 h. Purification by flash chromatography on silica gel using petroleum ether/EtOAc (10/1) afforded **3ea** as a white solid (102.7 mg, 99% yield).

**3ea**:  $R_f$  = 0.2 (petroleum ether/EtOAc = 3/1). Mp: 134-136 °C.  **$^1H$  NMR** (400 MHz,  $CDCl_3$ ):  $\delta$  7.69 (d,  $J$  = 7.2 Hz, 2H), 7.41-7.33 (m, 5H), 7.05-6.96 (m, 3H), 6.84-6.78 (m, 2H), 6.62 (t,  $J$  = 7.6 Hz, 1H), 5.95 (s, 1H), 5.79 (d,  $J$  = 7.6 Hz, 1H), 5.57 (s, 1H), 5.32 (d,  $J$  = 7.6 Hz, 1H), 3.74 (t,  $J$  = 10.0 Hz, 1H), 3.36 (d,  $J$  = 10.8 Hz, 1H), 3.25 (t,  $J$  = 10.0 Hz, 1H), 2.40 (d,  $J$  = 11.2 Hz, 1H), 2.30 (s, 3H), 2.26 (s, 3H) ppm.  **$^{13}C$  NMR** (100 MHz,  $CDCl_3$ ):  $\delta$  175.2, 171.6, 161.7 (d,  $J$  = 243.8 Hz), 152.9, 144.4, 140.6, 137.9 (d,  $J$  = 3.2 Hz), 135.5, 131.1, 130.8, 128.6, 128.20, 128.15, 127.9, 126.6 (d,  $J$  = 8.1 Hz), 126.2, 125.5, 124.5, 115.0 (d,  $J$  = 21.4 Hz), 111.0, 100.8, 68.2, 68.0, 56.7, 48.8, 41.6, 14.0, 13.9 ppm.  **$^{19}F$  NMR** (376 MHz,  $CDCl_3$ )  $\delta$  -115.81 ppm. **HRMS** (ESI)  $m/z$ :  $[M+Na]^+$  calcd. for  $C_{32}H_{27}FN_4O_2Na$ : 551.2010; found: 551.2010.

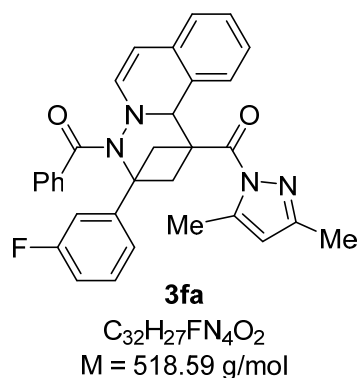

**(4-benzoyl-3-(3-fluorophenyl)-3,4-dihydro-2H-1,3-methanopyridazino[6,1-a]isoquinolin-1(11bH)-yl)(3,5-dimethyl-1H-pyrazol-1-yl)methanone (3fa):** Prepared from (3,5-dimethyl-1H-pyrazol-1-yl)(3-(3-fluorophenyl)bicyclo[1.1.0]butan-1-yl)methanone (**1f**, 54.6 mg, 0.20 mmol) and benzoyl(isoquinolin-2-ium-2-yl)amide (**2a**, 59.6 mg, 0.24 mmol) according to the **GP1** at rt for 16 h. Purification by flash chromatography on silica gel using petroleum ether/EtOAc (10/1) afforded **3fa** as a white solid (72.6 mg, 70% yield).

**3fa:**  $R_f$  = 0.2 (petroleum ether/EtOAc = 10/1). Mp: 218-220 °C.  **$^1H$  NMR** (400 MHz,  $CDCl_3$ ):  $\delta$  7.71 (d,  $J$  = 6.8 Hz, 2H), 7.43-7.28 (m, 4H), 7.20 (d,  $J$  = 7.6 Hz, 1H), 7.12 (d,  $J$  = 10.0 Hz, 1H), 7.00-6.90 (m, 2H), 6.84 (d,  $J$  = 7.6 Hz, 1H), 6.80 (d,  $J$  = 7.6 Hz, 1H), 6.62 (t,  $J$  = 7.6 Hz, 1H), 5.95 (s, 1H), 5.80 (d,  $J$  = 7.6 Hz, 1H), 5.58 (s, 1H), 5.33 (d,  $J$  = 7.6 Hz, 1H), 3.73 (t,  $J$  = 10.0 Hz, 1H), 3.38 (d,  $J$  = 10.8 Hz, 1H), 3.22 (t,  $J$  = 9.6 Hz, 1H), 2.42 (d,  $J$  = 11.6 Hz, 1H), 2.30 (s, 3H), 2.26 (s, 3H) ppm.  **$^{13}C$  NMR** (100 MHz,  $CDCl_3$ ):  $\delta$  175.1, 171.5, 162.9 (d,  $J$  = 243.9 Hz), 152.9, 144.6 (d,  $J$  = 7.2 Hz), 144.4, 140.6, 135.3, 131.1, 130.9, 129.8 (d,  $J$  = 8 Hz), 128.7, 128.3, 128.1, 127.9, 126.2, 125.5, 124.5, 120.3 (d,  $J$  = 2.8 Hz), 113.8 (d,  $J$  = 21.1 Hz), 111.9 (d,  $J$  = 22.1 Hz), 111.0, 100.9, 68.3, 68.0, 56.6, 48.7, 42.1, 14.0, 13.9 ppm.  **$^{19}F$  NMR** (376 MHz,  $CDCl_3$ )  $\delta$  -113.26 ppm. **HRMS** (ESI)  $m/z$ :  $[M+H]^+$  calcd. for  $C_{32}H_{28}FN_4O_2$ : 519.2191; found: 519.2191.

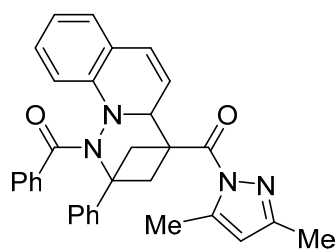**4ab**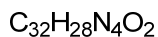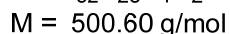

(1-benzoyl-2-phenyl-2,3-dihydro-1*H*-2,4-methanopyridazino[1,6-*a*]quinolin-4(4*aH*)-yl)(3,5-dimethyl-1*H*-pyrazol-1-yl)methanone (**4ab**) : Prepared from (3,5-dimethyl-1*H*-pyrazol-1-yl)(3-phenylbicyclo[1.1.0]butan-1-yl)methanone (**1a**, 50.5 mg, 0.2 mmol) and benzoyl(quinolin-1-ium-1-yl)amide (**2b**, 59.6 mg, 0.24 mmol) at room temperature for 16 h according to the **GP1**. Purification by flash chromatography on silica gel using petroleum ether/EtOAc (10/1) afforded **4ab** as a white solid (50.1 mg, 50% yield)

**4ab**:  $R_f = 0.3$  (petroleum ether/EtOAc = 10/1). Mp: 260-262 °C. **<sup>1</sup>H NMR** (400 MHz,  $\text{CDCl}_3$ ):  $\delta$  7.76 (d,  $J = 7.2$  Hz, 2H), 7.46 (d,  $J = 7.2$  Hz, 2H), 7.39-7.34 (m, 4H), 7.29-7.24 (m, 4H), 6.88 (d,  $J = 7.2$  Hz, 1H), 6.78 (t,  $J = 7.2$  Hz, 1H), 6.25 (d,  $J = 10.0$  Hz, 1H), 5.95 (s, 1H), 5.56 (d,  $J = 4.0$  Hz, 1H), 5.01 (dd,  $J = 10.0, 4.8$  Hz, 1H), 3.25-3.16 (m, 2H), 2.98-2.93 (m, 1H), 2.51 (s, 3H), 2.39 (d,  $J = 11.2$  Hz, 1H), 2.21 (s, 3H) ppm. **<sup>13</sup>C NMR** (100 MHz,  $\text{CDCl}_3$ ):  $\delta$  175.9, 171.3, 153.0, 146.3, 143.9, 142.2, 135.3, 130.7, 130.0, 128.1, 127.9, 127.8, 127.5, 127.4, 126.9, 126.0, 120.3, 120.1, 119.8, 111.7, 111.0, 68.5, 65.7, 57.0, 48.4, 39.3, 14.0, 13.9 ppm. **HRMS** (ESI)  $m/z$ :  $[\text{M}+\text{H}]^+$  calcd. for  $\text{C}_{32}\text{H}_{29}\text{N}_4\text{O}_2$ : 501.2285; found: 501.2282.

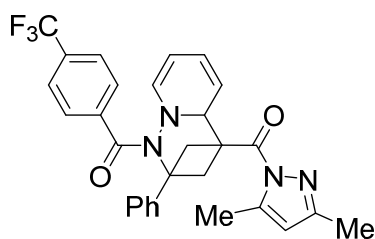**5ac**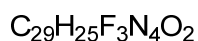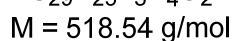

(3,5-dimethyl-1*H*-pyrazol-1-yl)(2-phenyl-1-(4-(trifluoromethyl)benzoyl)-2,3-dihydro-1*H*-2,4-methanopyrido[1,2-*b*]pyridazin-4(4*aH*)-yl)methanone (**5ac**): Prepared from (3,5-dimethyl-1*H*-pyrazol-1-yl)(3-phenylbicyclo[1.1.0]butan-1-yl)methanone (**1a**, 50.5 mg, 0.20 mmol) and pyridin-1-ium-1-yl(4-(trifluoromethyl)benzoyl)amide (**2c**, 63.9 mg, 0.24 mmol) according to the **GP1** at rt for 16 h. Purification by flash chromatography on silica gel using petroleum ether/EtOAc (10/1) afforded **5ac** as a white solid (51.8 mg, 50% yield).

**5ac**:  $R_f$  = 0.25 (petroleum ether/EtOAc = 10/1). Mp: 97-99 °C. **<sup>1</sup>H NMR** (400 MHz, CDCl<sub>3</sub>): δ 7.75 (d,  $J$  = 8.4 Hz, 2H), 7.67 (d,  $J$  = 8.4 Hz, 2H), 7.38-7.35 (m, 4H), 7.27-7.23 (m, 1H), 6.54 (d,  $J$  = 7.6 Hz, 1H), 5.94 (s, 1H), 5.73-5.69 (m 1H), 5.47 (d,  $J$  = 3.2 Hz, 1H), 4.69-4.61 (m, 2H), 3.45 (t,  $J$  = 10.4 Hz, 1H), 3.26 (d,  $J$  = 10.4 Hz, 1H), 3.01 (d,  $J$  = 9.6 Hz, 1H), 2.55 (d,  $J$  = 11.6 Hz, 1H), 2.51 (s, 3H), 2.21 (s, 3H) ppm. **<sup>13</sup>C NMR** (100 MHz, CDCl<sub>3</sub>): δ 174.3, 171.2, 152.9, 143.9, 141.7, 140.1, 139.6, 132.0 (q,  $J$  = 32.5 Hz), 128.3, 128.0, 127.1, 125.0 (q,  $J$  = 3.5 Hz), 124.8, 124.3, 123.8 (q,  $J$  = 267.6 Hz), 116.3, 111.0, 96.5, 68.1, 65.8, 56.6, 47.8, 40.7, 14.0, 13.9 ppm. **<sup>19</sup>F NMR** (376 MHz, CDCl<sub>3</sub>): δ -62.86 ppm. **HRMS** (ESI)  $m/z$ : [M+H]<sup>+</sup> calcd. for C<sub>29</sub>H<sub>26</sub>F<sub>3</sub>N<sub>4</sub>O<sub>2</sub>: 519.2002; found: 519.1992.

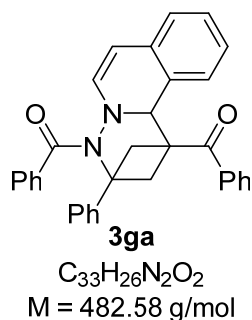

(3-phenyl-2,3-dihydro-4*H*-1,3-methanopyridazino[6,1-*a*]isoquinoline-1,4(11*bH*)-diyl)bis(phenyl methanone) (**3ga**): Prepared from phenyl(3-phenylbicyclo[1.1.0]butan-1-yl)methanone (**1g**, 46.9 mg, 0.20 mmol) and benzoyl(isoquinolin-2-ium-2-yl)amide (**2a**, 59.6 mg, 0.24 mmol) according to the **GP2** at rt for 16 h. Purification by flash chromatography on silica gel using petroleum ether/EtOAc (10/1) afforded **3ga** as a yellow solid (95.3 mg, 99% yield).

**3ga**:  $R_f = 0.3$  (petroleum ether/EtOAc = 10/1). Mp: 144-146 °C.  $^1\text{H NMR}$  (400 MHz,  $\text{CDCl}_3$ ):  $\delta$  7.69 (d,  $J = 6.8$  Hz, 2H), 7.61 (d,  $J = 7.6$  Hz, 2H), 7.43-7.31 (m, 8H), 7.28-7.19 (m, 3H), 6.98 (d,  $J = 8.0$  Hz, 1H), 6.86 (t,  $J = 7.6$  Hz, 1H), 6.80 (d,  $J = 7.6$  Hz, 1H), 6.53 (t,  $J = 7.6$  Hz, 1H), 6.45 (d,  $J = 7.6$  Hz, 1H), 5.46 (s, 1H), 5.41 (d,  $J = 8.0$  Hz, 1H), 3.87 (dd,  $J = 11.2, 8.8$  Hz, 1H), 3.29 (d,  $J = 10.4$  Hz, 1H), 3.06 (t,  $J = 10.0$  Hz, 1H), 2.44 (d,  $J = 11.2$  Hz, 1H) ppm.  $^{13}\text{C NMR}$  (100 MHz,  $\text{CDCl}_3$ ):  $\delta$  201.2, 175.3, 141.6, 141.0, 136.0, 135.5, 132.7, 130.84, 130.82, 128.7, 128.6, 128.3, 128.2, 128.1, 128.0, 127.9, 127.0, 125.8, 124.7, 124.5, 100.2, 69.7, 68.1, 58.4, 47.4, 43.6 ppm. **HRMS** (ESI)  $m/z$ :  $[\text{M}+\text{K}]^+$  calcd. for  $\text{C}_{33}\text{H}_{26}\text{N}_2\text{O}_2\text{K}$ : 521.1626; found: 521.1631.

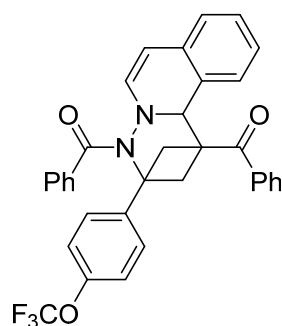**3ha**

$\text{C}_{34}\text{H}_{25}\text{F}_3\text{N}_2\text{O}_3$   
M = 566.58 g/mol

**(3-(4-(trifluoromethoxy)phenyl)-2,3-dihydro-4H-1,3-methanopyridazino[6,1-a]isoquinoline-1,4(11bH)-diyl)bis(phenylmethanone) (3ha)**: Prepared from phenyl(3-(4-(trifluoromethoxy)phenyl)bicyclo[1.1.0]butan-1-yl)methanone (**1h**, 63.7 mg, 0.20 mmol) and benzoyl(isoquinolin-2-ium-2-yl)amide (**2a**, 59.6 mg, 0.24 mmol) according to the **GP2** at rt for 16 h. Purification by flash chromatography on silica gel using petroleum ether/EtOAc (10/1) afforded **3ha** as a white solid (91.7 mg, 81% yield).

**3ha**:  $R_f = 0.3$  (petroleum ether/EtOAc = 10/1). Mp: 115-117 °C.  $^1\text{H NMR}$  (400 MHz,  $\text{CDCl}_3$ ):  $\delta$  7.69 (d,  $J = 6.8$  Hz, 2H), 7.59 (d,  $J = 8.0$  Hz, 2H), 7.44-7.35 (m, 6H), 7.28-7.25 (m, 2H), 7.17 (d,  $J = 8.0$  Hz, 2H), 6.95 (d,  $J = 8.0$  Hz, 1H), 6.87 (t,  $J = 7.6$  Hz, 1H), 6.81 (d,  $J = 7.6$  Hz, 1H), 6.54 (td,  $J = 7.4, 1.4$  Hz, 1H), 6.45 (d,  $J = 7.6$  Hz, 1H), 5.45 (s, 1H), 5.43 (d,  $J = 8.0$  Hz, 1H), 3.87 (dd,  $J = 11.2, 8.8$  Hz, 1H), 3.24 (d,  $J = 10.4$  Hz, 1H), 3.06 (t,  $J = 9.2$  Hz, 1H), 2.43 (d,  $J = 11.2$  Hz, 1H) ppm.  $^{13}\text{C NMR}$  (100 MHz,  $\text{CDCl}_3$ ):

$\delta$  201.0, 175.5, 148.0, 140.8, 140.4, 135.9, 135.1, 132.8, 131.0, 130.7, 128.8, 128.6, 128.2, 128.1, 128.0, 127.9, 126.4, 126.0, 124.6, 120.8, 120.4 (q,  $J = 255.6$  Hz), 100.5, 69.7, 67.5, 58.3, 47.5, 43.5 ppm.  **$^{19}\text{F}$  NMR** (376 MHz,  $\text{CDCl}_3$ )  $\delta$  -57.81 ppm. **HRMS** (ESI)  $m/z$ :  $[\text{M}+\text{H}]^+$  calcd. for  $\text{C}_{33}\text{H}_{26}\text{F}_3\text{N}_2\text{O}_3$ : 567.1890; found: 567.1883.

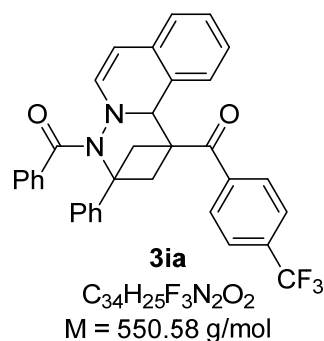

**(4-benzoyl-3-phenyl-3,4-dihydro-2H-1,3-methanopyridazino[6,1-a]isoquinolin-1(11bH)-yl)(4-(trifluoromethyl)phenyl)methanone (3ia)**: Prepared from (3-phenylbicyclo[1.1.0]butan-1-yl)(4-(trifluoromethyl)phenyl)methanone (**1i**, 60.4 mg, 0.20 mmol) and benzoyl(isoquinolin-2-ium-2-yl)amide (**2a**, 59.6 mg, 0.24 mmol) according to the **GP2** at rt for 16 h. Purification by flash chromatography on silica gel using petroleum ether/EtOAc (10/1) afforded **3ia** as a yellow solid (95.1 mg, 86% yield).

**3ia**:  $R_f = 0.3$  (petroleum ether/EtOAc = 10/1). Mp: 121-123 °C.  **$^1\text{H}$  NMR** (400 MHz,  $\text{CDCl}_3$ ):  $\delta$  7.69-7.65 (m,  $J = 6.8$  Hz, 4H), 7.49 (d,  $J = 8.0$  Hz, 2H), 7.43-7.41 (m, 3H), 7.38-7.32 (m, 4H), 7.22 (t,  $J = 7.2$  Hz, 1H), 7.00 (d,  $J = 8.0$  Hz, 1H), 6.89-6.81 (m, 2H), 6.54 (m,  $J = 7.6$  Hz, 1H), 6.45 (d,  $J = 7.6$  Hz, 1H), 5.44 (s, 1H), 5.42 (d,  $J = 8.0$  Hz, 1H), 3.88 (dd,  $J = 10.8, 9.2$  Hz, 1H), 3.28 (d,  $J = 10.4$  Hz, 1H), 3.06 (t,  $J = 8.8$  Hz, 1H), 2.42 (d,  $J = 11.2$  Hz, 1H) ppm.  **$^{13}\text{C}$  NMR** (100 MHz,  $\text{CDCl}_3$ ):  $\delta$ : 200.6, 175.3, 141.4, 141.1, 138.6, 135.3, 133.7 (q,  $J = 32.5$  Hz), 130.9, 130.8, 128.9, 128.8, 128.3, 128.2, 128.1, 127.9, 127.8, 127.1, 126.0, 125.1 (q,  $J = 3.7$  Hz), 124.7, 123.4 (q,  $J = 278.4$  Hz), 100.1, 69.7, 68.0, 58.4, 47.2, 43.6 ppm.  **$^{19}\text{F}$  NMR** (376 MHz,  $\text{CDCl}_3$ )  $\delta$  -63.22 ppm. **HRMS** (ESI)  $m/z$ :  $[\text{M}+\text{Na}]^+$  calcd. for  $\text{C}_{34}\text{H}_{25}\text{F}_3\text{N}_2\text{O}_2\text{Na}$ : 573.1760; found: 573.1749.

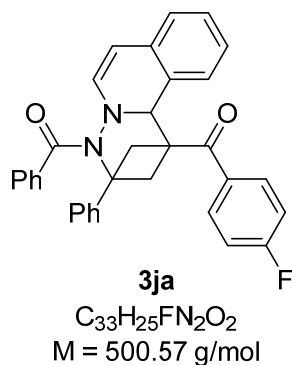

**(4-benzoyl-3-phenyl-3,4-dihydro-2H-1,3-methanopyridazino[6,1-a]isoquinolin-1(11bH)-yl)(4-fluorophenyl)methanone (3ja):** Prepared from (4-fluorophenyl)(3-phenylbicyclo[1.1.0]butan-1-yl)methanone (**1j**, 50.4 mg, 0.20 mmol) and benzoyl(isoquinolin-2-ium-2-yl)amide (**2a**, 59.6 mg, 0.24 mmol) according to the **GP2** at rt for 16 h. Purification by flash chromatography on silica gel using petroleum ether/EtOAc (10/1) afforded **3ja** as a yellow solid (90.8 mg, 91% yield).

**3ja:**  $R_f$  = 0.3 (petroleum ether/EtOAc = 10/1). Mp: 124-127 °C.  **$^1H$  NMR** (400 MHz,  $CDCl_3$ ):  $\delta$  7.69-7.66 (m, 2H), 7.64-7.61 (m, 2H), 7.43-7.32 (m, 7H), 7.22 (t,  $J$  = 7.2 Hz, 1H), 6.99 (d,  $J$  = 7.6 Hz, 1H), 6.93-6.85 (m, 3H), 6.80 (d,  $J$  = 7.6 Hz, 1H), 6.53 (t,  $J$  = 7.6 Hz, 1H), 6.44 (d,  $J$  = 7.6 Hz, 1H), 5.41 (s, 1H), 5.40 (d,  $J$  = 7.6 Hz, 1H), 3.86 (dd,  $J$  = 11.2, 8.8 Hz, 1H), 3.28 (d,  $J$  = 10.0 Hz, 1H), 3.03 (t,  $J$  = 9.6 Hz, 1H), 2.44 (d,  $J$  = 11.2 Hz, 1H) ppm.  **$^{13}C$  NMR** (100 MHz,  $CDCl_3$ ):  $\delta$  199.7, 175.3, 165.1 (d,  $J$  = 254.1 Hz), 141.5, 141.1, 135.4, 132.5 (d,  $J$  = 3.1 Hz), 131.3 (d,  $J$  = 9.4 Hz), 130.9, 130.8, 128.8, 128.3, 128.2, 128.1, 127.93, 127.90, 127.0, 125.9, 124.7, 124.5, 115.3 (d,  $J$  = 21.7 Hz), 100.1, 69.7, 68.0, 58.3, 47.3, 43.7 ppm.  **$^{19}F$  NMR** (376 MHz,  $CDCl_3$ )  $\delta$  -104.83 ppm. **HRMS** (ESI)  $m/z$ :  $[M+H]^+$  calcd. for  $C_{33}H_{26}FN_2O_2$ : 501.1973; found: 501.1965.

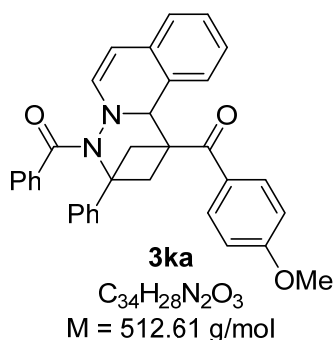

(4-benzoyl-3-phenyl-3,4-dihydro-2H-1,3-methanopyridazino[6,1-a]isoquinolin-1(11bH)-yl)(4-methoxyphenyl)methanone (**3ka**): Prepared from (4-methoxyphenyl)(3-phenylbicyclo[1.1.0]butan-1-yl)methanone (**1k**, 52.9 mg, 0.20 mmol) and benzoyl(isoquinolin-2-ium-2-yl)amide (**2a**, 59.6 mg, 0.24 mmol) according to the **GP2** at rt for 16 h. Purification by flash chromatography on silica gel using petroleum ether/EtOAc (10/1) afforded **3ka** as a yellow solid (95.3 mg, 93% yield).

**3ka**:  $R_f$  = 0.2 (petroleum ether/EtOAc = 10/1). Mp: 116-118 °C. **<sup>1</sup>H NMR** (400 MHz, CDCl<sub>3</sub>): δ 7.68 (d,  $J$  = 7.4 Hz, 2H), 7.61 (d,  $J$  = 8.8 Hz, 2H), 7.43-7.31 (m, 7H), 7.21 (t,  $J$  = 7.4 Hz, 1H), 6.96 (d,  $J$  = 7.6 Hz, 1H), 6.87 (t,  $J$  = 7.6 Hz, 1H), 6.79 (d,  $J$  = 7.6 Hz, 1H), 6.74 (d,  $J$  = 8.4 Hz, 2H), 6.54 (t,  $J$  = 7.6 Hz, 1H), 6.44 (d,  $J$  = 8.0 Hz, 1H), 5.42 (s, 1H), 5.39 (d,  $J$  = 8.0 Hz, 1H), 3.85 (t,  $J$  = 10.0 Hz, 1H), 3.78 (s, 3H), 3.29 (d,  $J$  = 10.4 Hz, 1H), 3.04 (t,  $J$  = 9.6 Hz, 1H), 2.44 (d,  $J$  = 11.2 Hz, 1H) ppm. **<sup>13</sup>C NMR** (100 MHz, CDCl<sub>3</sub>): δ 175.3, 163.0, 141.7, 141.0, 135.5, 131.0, 130.8, 129.3, 128.6, 128.24, 128.17, 128.1, 128.0, 127.9, 126.9, 125.7, 124.7, 124.4, 113.4, 100.2, 69.7, 68.1, 58.2, 55.4, 47.4, 43.7 ppm. **HRMS** (ESI)  $m/z$ : [M+H]<sup>+</sup> calcd. for C<sub>34</sub>H<sub>29</sub>N<sub>2</sub>O<sub>3</sub>: 513.2173; found: 513.2177.

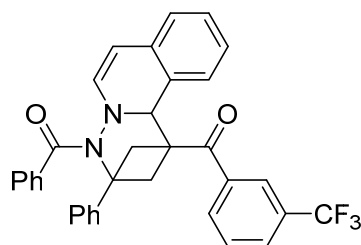**3la**

C<sub>34</sub>H<sub>25</sub>F<sub>3</sub>N<sub>2</sub>O<sub>2</sub>  
M = 550.58 g/mol

(4-benzoyl-3-phenyl-3,4-dihydro-2H-1,3-methanopyridazino[6,1-a]isoquinolin-1(11bH)-yl)(3-(trifluoromethyl)phenyl)methanone (**3la**): Prepared from (3-phenylbicyclo[1.1.0]butan-1-yl)(3-(trifluoromethyl)phenyl)methanone (**1l**, 60.5 mg, 0.20 mmol) and benzoyl(isoquinolin-2-ium-2-yl)amide (**2a**, 59.6 mg, 0.24 mmol) according to the **GP2** at rt for 16 h. Purification by flash chromatography on silica gel using petroleum ether/EtOAc (10/1) afforded **3la** as a yellow solid (89.5 mg, 81% yield).



**3la:**  $R_f = 0.3$  (petroleum ether/EtOAc = 10/1). Mp: 106-108 °C.  **$^1\text{H NMR}$**  (400 MHz,  $\text{CDCl}_3$ ):  $\delta$  7.79-7.78 (m, 2H), 7.68 (d,  $J = 7.2$  Hz, 2H), 7.58 (d,  $J = 7.6$  Hz, 1H), 7.44-7.32 (m, 8H), 7.22 (t,  $J = 7.2$  Hz, 1H), 7.03 (d,  $J = 8.0$  Hz, 1H), 6.84-6.81 (m, 2H), 6.52-6.46 (m, 2H), 5.45 (d,  $J = 8.0$  Hz, 1H), 5.40 (s, 1H), 3.92 (dd,  $J = 10.8, 8.8$  Hz, 1H), 3.29 (d,  $J = 10.4$  Hz, 1H), 3.04 (t,  $J = 9.6$  Hz, 1H), 2.45 (d,  $J = 11.2$  Hz, 1H) ppm.  **$^{13}\text{C NMR}$**  (100 MHz,  $\text{CDCl}_3$ ):  $\delta$  200.3, 175.4, 141.4, 141.3, 136.4, 135.4, 131.4, 130.91, 130.86, 130.5 (q,  $J = 32.7$  Hz), 128.9 (q,  $J = 3.5$  Hz), 128.84, 128.76, 128.3, 128.2, 127.99, 127.95, 127.8, 127.1, 126.0, 125.6 (q,  $J = 4.0$  Hz), 124.9, 124.7, 123.4 (q,  $J = 270.9$  Hz), 100.2, 69.8, 68.1, 58.3, 47.1, 43.9 ppm.  **$^{19}\text{F NMR}$**  (376 MHz,  $\text{CDCl}_3$ )  $\delta$  -62.94 ppm. **HRMS** (ESI)  $m/z$ :  $[\text{M}+\text{Na}]^+$  calcd. for  $\text{C}_{34}\text{H}_{26}\text{F}_3\text{N}_2\text{O}_2\text{Na}$ : 573.1760; found: 573.1749.

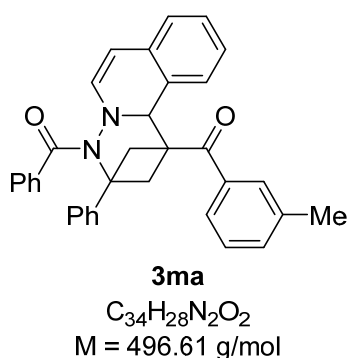

**(4-benzoyl-3-phenyl-3,4-dihydro-2H-1,3-methanopyridazino[6,1-a]isoquinolin-1(11bH)-yl)(m-tolyl)methanone (3ma):** Prepared from (3-phenylbicyclo[1.1.0]butan-1-yl)(*m*-tolyl)methanone (**1m**, 49.5 mg, 0.20 mmol) and benzoyl(isoquinolin-2-ium-2-yl)amide (**2a**, 59.6 mg, 0.24 mmol) according to the **GP2** at rt for 16 h. Purification by flash chromatography on silica gel using petroleum ether/EtOAc (10/1) afforded **3ma** as a yellow solid (69.6 mg, 70% yield).

**3ma:**  $R_f = 0.3$  (petroleum ether/EtOAc = 10/1). Mp: 104-106 °C.  **$^1\text{H NMR}$**  (400 MHz,  $\text{CDCl}_3$ ):  $\delta$  7.68 (d,  $J = 7.2$  Hz, 2H), 7.42-7.31 (m, 9H), 7.23-7.19 (m, 2H), 7.14 (t,  $J = 7.6$  Hz, 1H), 6.98 (d,  $J = 8.0$  Hz, 1H), 6.86 (t,  $J = 7.6$  Hz, 1H), 6.81 (d,  $J = 7.2$  Hz, 1H), 6.54 (t,  $J = 7.6$  Hz, 1H), 6.46 (d,  $J = 7.6$  Hz, 1H), 5.44 (s, 1H), 5.41 (d,  $J = 7.6$  Hz, 1H), 3.86 (dd,  $J = 10.8, 8.8$  Hz, 1H), 3.28 (d,  $J = 10.4$  Hz, 1H), 3.04 (t,  $J = 9.6$  Hz, 1H), 2.42

(d,  $J = 11.2$  Hz, 1H), 2.26 (s, 3H) ppm.  $^{13}\text{C}$  NMR (100 MHz,  $\text{CDCl}_3$ ):  $\delta$  201.5, 175.3, 141.6, 141.1, 137.9, 136.0, 135.5, 133.5, 130.9, 130.8, 129.3, 128.6, 128.25, 128.19, 128.14, 128.08, 128.0, 127.9, 127.0, 125.9, 125.8, 124.7, 124.4, 100.2, 69.8, 68.1, 58.5, 47.4, 43.8, 21.2 ppm. HRMS (ESI)  $m/z$ :  $[\text{M}+\text{K}]^+$  calcd. for  $\text{C}_{34}\text{H}_{28}\text{N}_2\text{O}_2\text{K}$ : 535.1783; found: 535.1767.

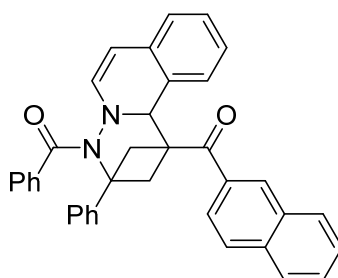

**3na**  
 $\text{C}_{37}\text{H}_{28}\text{N}_2\text{O}_2$   
 $M = 532.64$  g/mol

(1-(2-naphthoyl)-3-phenyl-1,2,3,11b-tetrahydro-4H-1,3-methanopyridazino[6,1-a]isoquinolin-4-yl)(phenyl)methanone (**3na**): Prepared from naphthalen-2-yl(3-phenylbicyclo[1.1.0]butan-1-yl)methanone (**1n**, 56.9 mg, 0.20 mmol) and benzoyl(isoquinolin-2-ium-2-yl)amide (**2a**, 59.6 mg, 0.24 mmol) according to the **GP2** at rt for 16 h. Purification by flash chromatography on silica gel using petroleum ether/EtOAc (10/1) afforded **3na** as a yellow solid (101.1 mg, 95% yield).

**3na**:  $R_f = 0.3$  (petroleum ether/EtOAc = 10/1). Mp: 108-110 °C.  $^1\text{H}$  NMR (400 MHz,  $\text{CDCl}_3$ ):  $\delta$  8.11 (s, 1H), 7.78-7.76 (m, 2H), 7.72-7.70 (m, 4H), 7.55-7.48 (m, 2H), 7.44-7.31 (m, 7H), 7.21 (t,  $J = 7.6$  Hz, 1H), 7.03 (d,  $J = 7.6$  Hz, 1H), 6.79-6.72 (m, 2H), 6.46-6.42 (m, 2H), 5.52 (s, 1H), 5.47 (d,  $J = 7.6$  Hz, 1H), 3.98 (t,  $J = 10.0$  Hz, 1H), 3.36 (d,  $J = 10.4$  Hz, 1H), 3.13 (t,  $J = 9.6$  Hz, 1H), 2.49 (d,  $J = 11.2$  Hz, 1H) ppm.  $^{13}\text{C}$  NMR (100 MHz,  $\text{CDCl}_3$ ):  $\delta$  201.1, 175.3, 141.6, 141.2, 135.5, 135.1, 133.4, 132.1, 130.9, 130.84, 130.79, 129.6, 128.7, 128.5, 128.3, 128.2, 128.12, 128.06, 128.0, 127.9, 127.6, 127.0, 126.6, 125.9, 124.7, 124.5, 124.0, 100.2, 69.9, 68.2, 58.6, 47.5, 43.9 ppm. HRMS (ESI)  $m/z$ :  $[\text{M}+\text{H}]^+$  calcd. for  $\text{C}_{37}\text{H}_{29}\text{N}_2\text{O}_2$ : 533.2224; found: 533.2212.

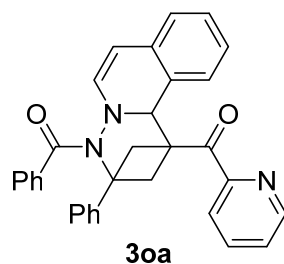

**3oa**  
 $C_{32}H_{25}N_3O_2$   
M = 483.57 g/mol

**(4-benzoyl-3-phenyl-3,4-dihydro-2H-1,3-methanopyridazino[6,1-a]isoquinolin-1(11bH)-yl)(pyridin-2-yl)methanone (3oa):** Prepared from (3-phenylbicyclo[1.1.0]butan-1-yl)(pyridin-2-yl)methanone (**1o**, 47.6 mg, 0.20 mmol) and benzoyl(isoquinolin-2-ium-2-yl)amide (**2a**, 59.6 mg, 0.24 mmol) according to the **GP2** at rt for 16 h. Purification by flash chromatography on silica gel using petroleum ether/EtOAc (10/1) afforded **3oa** as a yellow solid (51.6 mg, 53% yield).

**3oa:**  $R_f$  = 0.3 (petroleum ether/EtOAc = 10/1). Mp: 123-125 °C.  **$^1H$  NMR** (400 MHz,  $CDCl_3$ ):  $\delta$  8.71 (d,  $J$  = 4.8 Hz, 1H), 7.84 (d,  $J$  = 7.6 Hz, 1H), 7.80-7.72 (m, 3H), 7.46-7.31 (m, 8H), 7.21 (t,  $J$  = 7.2 Hz, 1H), 6.91-6.87 (m, 2H), 6.77 (d,  $J$  = 7.6 Hz, 1H), 6.48 (t,  $J$  = 7.6 Hz, 1H), 6.15 (d,  $J$  = 7.6 Hz, 1H), 5.88 (s, 1H), 5.33 (d,  $J$  = 7.6 Hz, 1H), 3.82 (dd,  $J$  = 11.2, 8.0 Hz, 1H), 3.27-3.18 (m, 2H), 2.37 (d,  $J$  = 11.6 Hz, 1H) ppm.  **$^{13}C$  NMR** (100 MHz,  $CDCl_3$ ):  $\delta$  200.3, 175.0, 153.1, 149.0, 142.1, 140.8, 136.8, 135.7, 131.2, 130.7, 128.7, 128.4, 128.3, 128.2, 127.8, 126.9, 126.8, 125.3, 124.8, 124.6, 122.8, 100.5, 69.1, 68.8, 59.0, 48.1, 42.2 ppm. **HRMS** (ESI)  $m/z$ :  $[M+H]^+$  calcd. for  $C_{32}H_{26}N_3O_2$ : 484.2020; found: 484.2012.

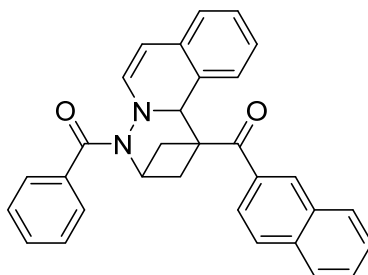

**3pa**  
 $C_{31}H_{24}N_2O_2$   
M = 456.55 g/mol

**(1-(2-naphthoyl)-1,2,3,11b-tetrahydro-4H-1,3-methanopyridazino[6,1-a]isoquinolin-4-yl)**

**(phenyl)methanone (3pa)** : Prepared from bicyclo[1.1.0]butan-1-yl(naphthalen-2-yl)methanone (**1p**, 41.7 mg, 0.2 mmol) and benzoyl(isoquinolin-2-ium-2-yl)amide (**2a**, 59.6 mg, 0.24 mmol) at room temperature for 16 h according to the **GP2**. Purification by flash chromatography on silica gel using petroleum ether/EtOAc (10/1) afforded **3pa** as a yellow solid (32.0 mg, 35% yield)

**3pa**:  $R_f$  = 0.3 (petroleum ether/EtOAc = 5/1). Mp: 207-209 °C. **<sup>1</sup>H NMR** (400 MHz, CDCl<sub>3</sub>): δ 8.09 (s, 1H), 7.78-7.67 (m, 6H), 7.55-7.46 (m, 2H), 7.42-7.37 (m, 3H), 6.76-6.70 (m, 2H), 6.56 (d,  $J$  = 7.6 Hz, 1H), 6.50-6.42 (m, 2H), 5.62 (s, 1H), 5.37 (d,  $J$  = 7.6 Hz, 1H), 4.94 (s, 1H), 3.50 (t,  $J$  = 9.2 Hz, 1H), 2.82 (dd,  $J$  = 10.0, 4.0 Hz, 1H), 2.72 (dd,  $J$  = 11.2, 4.8 Hz, 1H), 2.55 (t,  $J$  = 9.2 Hz, 1H) ppm. **<sup>13</sup>C NMR** (100 MHz, CDCl<sub>3</sub>): δ 201.3, 172.4, 141.2, 135.0, 134.9, 133.3, 132.1, 130.8, 130.5, 129.5, 128.7, 128.5, 128.1, 128.02, 127.98, 127.9, 127.6, 126.6, 125.8, 124.5, 124.0, 100.4, 70.1, 61.6, 54.1, 48.1, 35.4 ppm. **HRMS** (ESI)  $m/z$ : [M+H]<sup>+</sup> calcd. for C<sub>31</sub>H<sub>25</sub>N<sub>2</sub>O<sub>2</sub>: 457.1911; found: 457.1903.

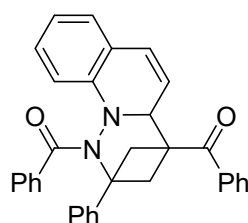**4gb**

C<sub>33</sub>H<sub>26</sub>N<sub>2</sub>O<sub>2</sub>  
M = 482.58 g/mol

**(2-phenyl-2,3-dihydro-1H-2,4-methanopyridazino[1,6-a]quinoline-1,4(4aH)-diyl)bis(phenyl**

**methanone) (4gb)** : Prepared from phenyl(3-phenylbicyclo[1.1.0]butan-1-yl)methanone (**1g**, 46.9 mg, 0.2 mmol) and benzoyl(quinolin-1-ium-1-yl)amide (**2b**, 59.6 mg, 0.24 mmol) at room temperature for 16 h according to the **GP2**. Purification by flash chromatography on silica gel using petroleum ether/EtOAc (10/1) afforded **4gb** as a yellow solid (92.0 mg, 95% yield)

**4gb:**  $R_f$  = 0.3 (petroleum ether/EtOAc = 10/1). Mp: 268-270 °C.  $^1\text{H NMR}$  (400 MHz,  $\text{CDCl}_3$ ):  $\delta$  7.84 (d,  $J$  = 7.6 Hz, 2H), 7.77 (d,  $J$  = 7.6 Hz, 2H), 7.58-7.55 (m, 1H), 7.48-7.44 (m, 4H), 7.40-7.32 (m, 5H), 7.29-7.23 (m, 3H), 6.91 (d,  $J$  = 7.2 Hz, 1H), 6.83 (t,  $J$  = 6.8 Hz, 1H), 6.24 (d,  $J$  = 10.4 Hz, 1H), 5.30 (s, 1H), 5.05-5.03 (m, 1H), 3.26 (d,  $J$  = 9.6 Hz, 1H), 3.15-3.05 (m, 2H), 2.43 (d,  $J$  = 10.8 Hz, 1H) ppm.  $^{13}\text{C NMR}$  (100 MHz,  $\text{CDCl}_3$ ):  $\delta$  199.0, 175.8, 146.1, 141.8, 135.6, 134.9, 133.5, 131.0, 130.2, 128.9, 128.6, 128.12, 128.09, 127.9, 127.6, 127.4, 127.0, 125.9, 120.5, 119.5, 111.8, 68.4, 66.9, 59.6, 47.9, 40.3 ppm. **HRMS** (ESI)  $m/z$ :  $[\text{M}+\text{H}]^+$  calcd. for  $\text{C}_{33}\text{H}_{27}\text{N}_2\text{O}_2$ : 483.2067; found: 483.2066.

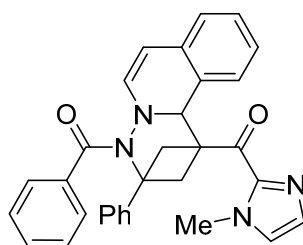**3qa**

$\text{C}_{31}\text{H}_{26}\text{N}_4\text{O}_2$   
M = 486.58 g/mol

**(4-benzoyl-3-phenyl-3,4-dihydro-2H-1,3-methanopyridazino[6,1-a]isoquinolin-1(11bH)-yl)(1-methyl-1H-imidazol-2-yl)methanone (3qa):** Prepared from (1-methyl-1H-imidazol-2-yl)(3-phenylbicyclo[1.1.0]butan-1-yl)methanone (**1q**, 47.7 mg, 0.20 mmol) and benzoyl(isoquinolin-2-ium-2-yl)amide (**2a**, 59.6 mg, 0.24 mmol) according to the **GP3** at rt for 12 h. Purification by flash chromatography on silica gel using petroleum ether/EtOAc (3/1) afforded **3qa** as a white solid (85.5 mg, 91% yield).

**(R)-3qa:** Prepared from (1-methyl-1H-imidazol-2-yl)(3-phenylbicyclo[1.1.0]butan-1-yl)methanone (**1q**, 47.7 mg, 0.20 mmol) and benzoyl(isoquinolin-2-ium-2-yl)amide (**2a**, 59.6 mg, 0.24 mmol) according to the **GP4** at rt for 16 h. Purification by flash chromatography on silica gel using petroleum ether/EtOAc (3/1) afforded **(R)-3qa** as a white solid (77.7 mg, 80% yield).

**3qa:**  $R_f$  = 0.3 (petroleum ether/EtOAc = 3/1). Mp: 257-259 °C.  $^1\text{H NMR}$  (400 MHz,  $\text{CDCl}_3$ ):  $\delta$  7.69 (d,  $J$  = 6.0 Hz, 2H), 7.44 (d,  $J$  = 7.2 Hz, 2H), 7.37-7.32 (m, 5H), 7.23-

7.18 (m, 2H), 6.97 (s, 1H), 6.93 (t,  $J = 7.6$  Hz, 1H), 6.88 (d,  $J = 8.0$  Hz, 1H), 6.77 (d,  $J = 7.2$  Hz, 1H), 6.56 (t,  $J = 7.2$  Hz, 1H), 5.88 (d,  $J = 7.6$  Hz, 1H), 5.67 (s, 1H), 5.30 (d,  $J = 7.6$  Hz, 1H), 3.76-3.71 (m, 1H), 3.71 (s, 3H), 3.38-3.28 (m, 2H), 2.40 (d,  $J = 11.6$  Hz, 1H) ppm.  $^{13}\text{C}$  NMR (100 MHz,  $\text{CDCl}_3$ ):  $\delta$  190.9, 174.8, 142.7, 142.2, 141.0, 135.6, 131.3, 130.6, 129.8, 128.43, 128.38, 128.3, 128.1, 127.7, 126.7, 126.53, 126.46, 124.83, 124.82, 124.6, 100.5, 69.0, 68.6, 58.9, 48.3, 41.4, 35.6 ppm. HRMS (ESI)  $m/z$ :  $[\text{M}+\text{H}]^+$  calcd. for  $\text{C}_{31}\text{H}_{27}\text{N}_4\text{O}_2$ : 487.2129; found: 487.2126.

HPLC analysis (Chiralpak AD-H,  $i\text{PrOH}$ /hexane = 15/85, 1.0 mL/min, 254 nm;  $t_r$  (major) = 17.28 min,  $t_r$  (minor) = 19.41 min gave the isomeric composition of the product: 88% ee.  $[\alpha]_{\text{D}}^{20} = -86.8$  ( $c = 1.00$ ,  $\text{CHCl}_3$ ).

#### <Chromatogram>

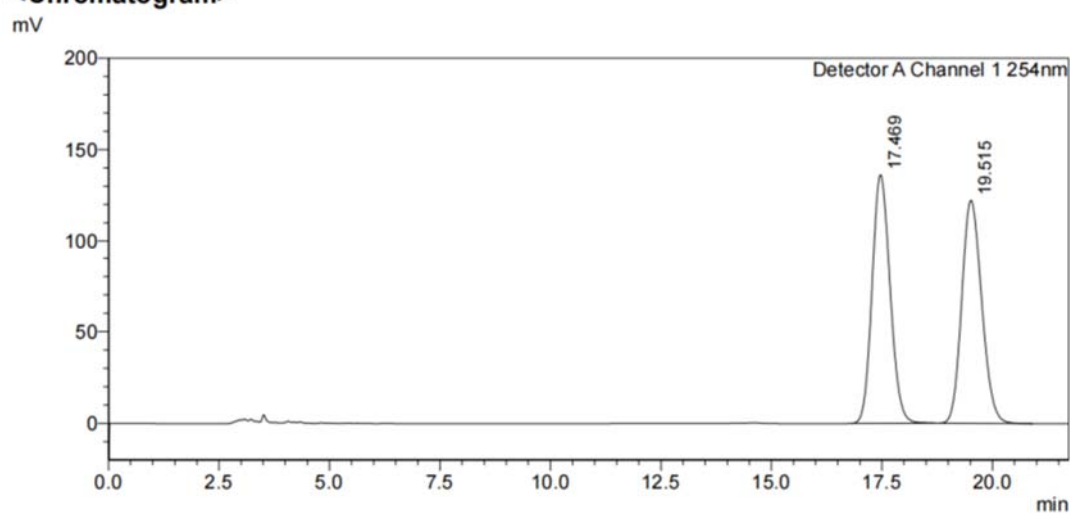

| Peak# | Ret. Time | Peak Start | Area    | Height | Area%   |
|-------|-----------|------------|---------|--------|---------|
| 1     | 17.469    | 16.817     | 3850764 | 136165 | 50.071  |
| 2     | 19.515    | 18.800     | 3839793 | 122279 | 49.929  |
| Total |           |            | 7690557 | 258443 | 100.000 |

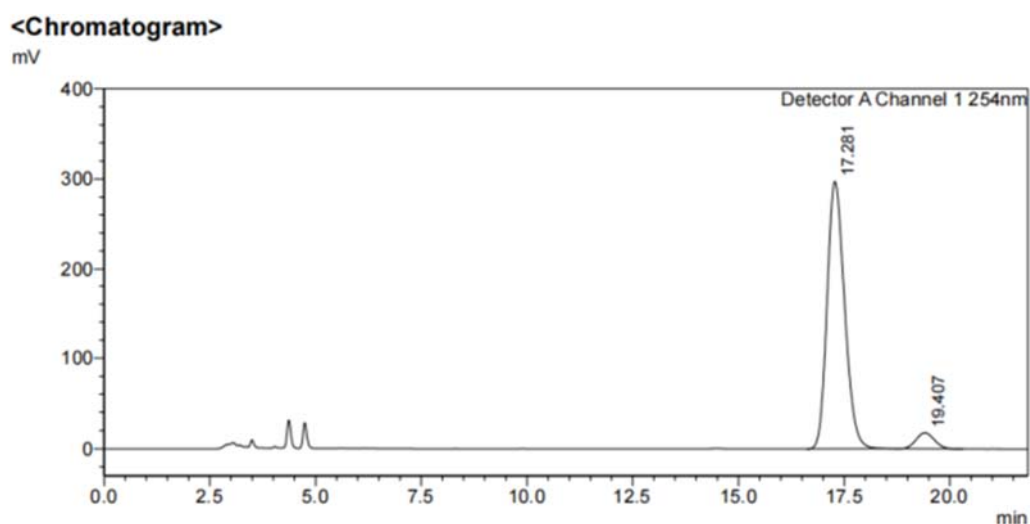

| Peak# | Ret. Time | Peak Start | Area    | Height | Area%   |
|-------|-----------|------------|---------|--------|---------|
| 1     | 17.281    | 16.617     | 8542135 | 297177 | 94.033  |
| 2     | 19.407    | 18.800     | 542071  | 17741  | 5.967   |
| Total |           |            | 9084206 | 314918 | 100.000 |

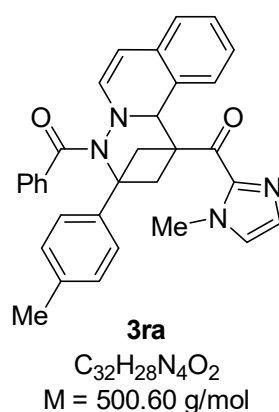

(4-benzoyl-3-(*p*-tolyl)-3,4-dihydro-2*H*-1,3-methanopyridazino[6,1-*a*]isoquinolin-1(11*bH*)-yl)(1-methyl-1*H*-imidazol-2-yl)methanone (**3ra**): Prepared from (1-methyl-1*H*-imidazol-2-yl)(3-(*p*-tolyl)bicyclo[1.1.0]butan-1-yl)methanone (**1r**, 50.5 mg, 0.20 mmol) and benzoyl(isoquinolin-2-ium-2-yl)amide (**1a**, 59.6 mg, 0.24 mmol) according to the **GP3** at rt for 12 h. Purification by flash chromatography on silica gel using petroleum ether/EtOAc (3/1) afforded **3ra** as a yellow solid (98.1 mg, 98% yield).

**3ra**:  $R_f = 0.35$  (petroleum ether/EtOAc = 3/1). Mp: 147-149 °C.  $^1\text{H NMR}$  (400 MHz,  $\text{CDCl}_3$ ):  $\delta$  7.69 (d,  $J = 8.4$  Hz, 2H), 7.39-7.32 (m, 5H), 7.25 (s, 1H), 7.19 (s, 1H), 7.14 (d,  $J = 7.6$  Hz, 2H), 6.98 (s, 1H), 6.93 (t,  $J = 8.0$  Hz, 1H), 6.86 (d,  $J = 7.6$  Hz, 1H), 6.77

(d,  $J = 7.2$  Hz, 1H), 6.56 (t,  $J = 8.4$  Hz, 1H), 5.87 (d,  $J = 7.6$  Hz, 1H), 5.65 (s, 1H), 5.30 (d,  $J = 7.6$  Hz, 1H), 3.73 (s, 3H), 3.73-3.69 (m, 1H), 3.35-3.27 (m, 2H), 2.38 (d,  $J = 11.2$  Hz, 1H), 2.31 (s, 3H) ppm.  $^{13}\text{C}$  NMR (100 MHz,  $\text{CDCl}_3$ ):  $\delta$  191.0, 174.9, 142.8, 141.1, 139.4, 136.3, 135.8, 131.3, 130.5, 129.8, 128.9, 128.4, 128.3, 127.7, 126.50, 126.48, 124.82, 124.78, 124.6, 100.5, 69.0, 68.5, 58.9, 48.4, 41.4, 35.7, 21.1 ppm. HRMS (ESI)  $m/z$ :  $[\text{M}+\text{H}]^+$  calcd. for  $\text{C}_{32}\text{H}_{29}\text{N}_4\text{O}_2$ : 501.2285; found: 501.2277.

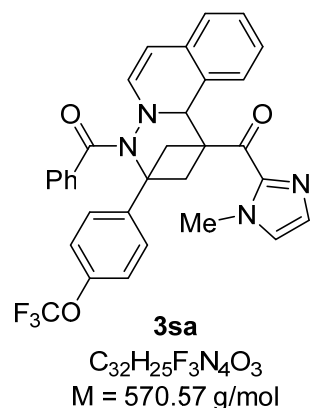

**(4-benzoyl-3-(4-(trifluoromethoxy)phenyl)-3,4-dihydro-2H-1,3-methanopyridazino[6,1-a]**

**isoquinolin-1(11bH)-yl)(1-methyl-1H-imidazol-2-yl)methanone (3sa):** Prepared from (1-methyl-1H-imidazol-2-yl)(3-(4-(trifluoromethoxy)phenyl)bicyclo[1.1.0]butan-1-yl)methanone (**1s**, 64.5 mg, 0.20 mmol) and benzoyl(isoquinolin-2-ium-2-yl)amide (**2a**, 59.6 mg, 0.24 mmol) according to the **GP3** at rt for 12 h. Purification by flash chromatography on silica gel using petroleum ether/EtOAc (3/1) afforded **3sa** as a yellow solid (111.8 mg, 98% yield).

**3sa:**  $R_f = 0.3$  (petroleum ether/EtOAc = 3/1). Mp: 214-216 °C.  $^1\text{H}$  NMR (400 MHz,  $\text{CDCl}_3$ ):  $\delta$  7.69 (d,  $J = 7.2$  Hz, 2H), 7.45 (d,  $J = 8.0$  Hz, 2H), 7.39-7.32 (m, 3H), 7.19-7.17 (m, 3H), 6.99 (s, 1H), 6.94 (t,  $J = 7.2$  Hz, 1H), 6.85 (d,  $J = 7.6$  Hz, 1H), 6.78 (d,  $J = 7.6$  Hz, 1H), 6.57 (t,  $J = 7.6$  Hz, 1H), 5.88 (d,  $J = 7.6$  Hz, 1H), 5.65 (s, 1H), 5.32 (d,  $J = 7.6$  Hz, 1H), 3.76-3.73 (m, 1H), 3.73 (s, 3H), 3.32-3.28 (m, 2H), 2.39 (d,  $J = 11.2$  Hz, 1H) ppm.  $^{13}\text{C}$  NMR (100 MHz,  $\text{CDCl}_3$ ):  $\delta$  190.6, 175.1, 147.8, 142.6, 141.0, 140.8, 135.3, 131.2, 130.8, 129.8, 128.5, 128.3, 128.2, 127.8, 126.6, 126.5, 126.4, 125.0, 124.7, 120.6, 120.4 (q,  $J = 255.5$  Hz), 100.8, 69.0, 68.0, 58.8, 48.3, 41.2, 35.6 ppm.



$^{19}\text{F}$  NMR (376 MHz,  $\text{CDCl}_3$ )  $\delta$  -57.72 ppm. HRMS (ESI)  $m/z$ :  $[\text{M}+\text{Na}]^+$  calcd. for  $\text{C}_{32}\text{H}_{25}\text{F}_3\text{N}_4\text{O}_3\text{Na}$ : 593.1771; found: 593.1761.

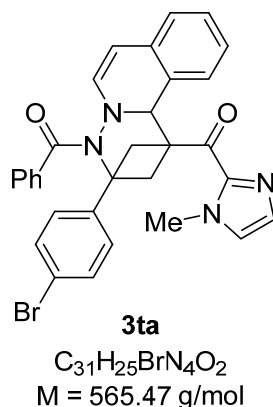

(4-benzoyl-3-(3-bromophenyl)-3,4-dihydro-2H-1,3-methanopyridazino[6,1-a]isoquinolin-1(11bH)-yl)(1-methyl-1H-imidazol-2-yl)methanone (**3ta**): Prepared from (3-(4-bromophenyl)bicyclo[1.1.0]butan-1-yl)(1-methyl-1H-imidazol-2-yl)methanone (**1t**, 63.4 mg, 0.20 mmol) and benzoyl(isoquinolin-2-ium-2-yl)amide (**2a**, 59.6 mg, 0.24 mmol) according to the **GP3** at rt for 12 h. Purification by flash chromatography on silica gel using petroleum ether/EtOAc (3/1) afforded **3ta** as a white solid (74.3 mg, 66% yield).

**3ta**:  $R_f = 0.35$  (petroleum ether/EtOAc = 3/1). Mp: 232-234 °C.  $^1\text{H}$  NMR (400 MHz,  $\text{CDCl}_3$ ):  $\delta$  7.69 (d,  $J = 6.8$  Hz, 2H), 7.45 (d,  $J = 8.4$  Hz, 2H), 7.38-7.33 (m, 5H), 7.19 (s, 1H), 6.98 (s, 1H), 6.94 (t,  $J = 7.2$  Hz, 1H), 6.84 (d,  $J = 8.0$  Hz, 1H), 6.78 (d,  $J = 7.6$  Hz, 1H), 6.57 (t,  $J = 7.6$  Hz, 1H), 5.88 (d,  $J = 7.6$  Hz, 1H), 5.65 (s, 1H), 5.31 (d,  $J = 7.6$  Hz, 1H), 3.73 (s, 3H), 3.73-3.70 (m, 1H), 3.32-3.26 (m, 2H), 2.36 (d,  $J = 11.6$  Hz, 1H) ppm.  $^{13}\text{C}$  NMR (100 MHz,  $\text{CDCl}_3$ ):  $\delta$  190.6, 175.0, 142.6, 141.3, 140.8, 135.3, 131.3, 131.2, 130.7, 129.8, 128.5, 128.28, 128.25, 127.8, 126.7, 126.6, 126.5, 124.9, 124.7, 120.6, 100.8, 69.0, 68.1, 58.8, 48.2, 41.2, 35.7 ppm. HRMS (ESI)  $m/z$ :  $[\text{M}+\text{H}]^+$  calcd. for  $\text{C}_{31}\text{H}_{26}\text{BrN}_4\text{O}_2$ : 565.1234; found: 565.1225.

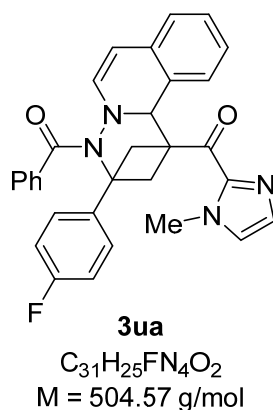

(4-benzoyl-3-(4-fluorophenyl)-3,4-dihydro-2*H*-1,3-methanopyridazino[6,1-*a*]isoquinolin-1(11*bH*)-yl)(1-methyl-1*H*-imidazol-2-yl)methanone (**3ua**): Prepared from (3-(4-fluorophenyl)bicyclo[1.1.0]butan-1-yl)(1-methyl-1*H*-imidazol-2-yl)methanone (**1u**, 51.3 mg, 0.20 mmol) and benzoyl(isoquinolin-2-ium-2-yl)amide (**2a**, 59.6 mg, 0.24 mmol) according to the **GP3** at rt for 12 h. Purification by flash chromatography on silica gel using petroleum ether/EtOAc (3/1) afforded **3ua** as a yellow solid (100.0 mg, 99% yield).

**3ua**:  $R_f$  = 0.3 (petroleum ether/EtOAc = 3/1). Mp: 240-242 °C. **<sup>1</sup>H NMR** (400 MHz,  $CDCl_3$ ):  $\delta$  7.68 (d,  $J$  = 7.2 Hz, 2H), 7.41-7.32 (m, 5H), 7.25 (s, 1H), 7.19 (s, 1H), 7.04-6.99 (m, 3H), 6.94 (t,  $J$  = 7.6 Hz, 1H), 6.85 (d,  $J$  = 7.6 Hz, 1H), 6.78 (d,  $J$  = 7.6 Hz, 1H), 6.57 (t,  $J$  = 7.6 Hz, 1H), 5.88 (d,  $J$  = 7.6 Hz, 1H), 5.65 (s, 1H), 5.31 (d,  $J$  = 8.0 Hz, 1H), 3.77-3.71 (m, 1H), 3.73 (s, 3H), 3.35-3.31 (m, 2H), 2.37 (d,  $J$  = 11.6 Hz, 1H) ppm. **<sup>13</sup>C NMR** (100 MHz,  $CDCl_3$ ):  $\delta$  190.7, 175.1, 161.6 (d,  $J$  = 243.7 Hz), 142.7, 140.9, 138.2 (d,  $J$  = 3.2 Hz), 135.5, 131.2, 130.7, 129.8, 128.5, 128.31, 128.27, 127.8, 126.7 (d,  $J$  = 8.1 Hz), 126.6, 126.5, 124.9, 124.7, 114.9 (d,  $J$  = 21.4 Hz), 100.7, 69.0, 68.1, 58.9, 48.4, 41.3, 35.7 ppm. **<sup>19</sup>F NMR** (376 MHz,  $CDCl_3$ )  $\delta$  -115.99 ppm. **HRMS** (ESI)  $m/z$ :  $[M+H]^+$  calcd. for  $C_{31}H_{26}FN_4O_2$ : 505.2034; found: 505.2039.

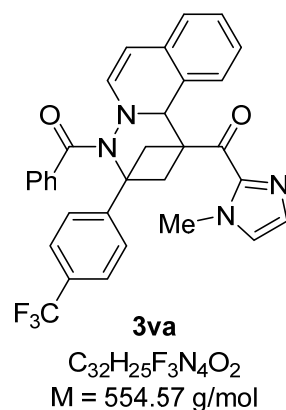

**(4-benzoyl-3-(4-(trifluoromethyl)phenyl)-3,4-dihydro-2H-1,3-methanopyridazino[6,1-a]isoquinolin-1(11bH)-yl)(1-methyl-1H-imidazol-2-yl)methanone (3va):** Prepared from ((1-methyl-1H-imidazol-2-yl)(3-(4-(trifluoromethyl)phenyl)bicyclo[1.1.0]butan-1-yl)methanone (**1v**, 61.3 mg, 0.20 mmol) and benzoyl(isoquinolin-2-ium-2-yl)amide (**2a**, 59.6 mg, 0.24 mmol) according to the **GP3** at rt for 12 h. Purification by flash chromatography on silica gel using petroleum ether/EtOAc (3/1) afforded **3va** as a yellow solid (93.6 mg, 84% yield).

**3va:**  $R_f$  = 0.3 (petroleum ether/EtOAc = 3/1). Mp: 257-259 °C. **<sup>1</sup>H NMR** (400 MHz,  $CDCl_3$ ):  $\delta$  7.71 (d,  $J$  = 7.6 Hz, 2H), 7.60 (d,  $J$  = 8.4 Hz, 2H), 7.54 (d,  $J$  = 8.0 Hz, 2H), 7.42-7.33 (m, 3H), 7.20 (s, 1H), 7.01 (s, 1H), 6.96 (t,  $J$  = 7.6 Hz, 1H), 6.87 (d,  $J$  = 7.6 Hz, 1H), 6.80 (d,  $J$  = 7.6 Hz, 1H), 6.59 (t,  $J$  = 7.6 Hz, 1H), 5.89 (d,  $J$  = 8.0 Hz, 1H), 5.67 (s, 1H), 5.34 (d,  $J$  = 7.6 Hz, 1H), 3.78-3.73 (m, 1H), 3.75 (s, 3H), 3.39-3.28 (m, 2H), 2.39 (d,  $J$  = 11.2 Hz, 1H) ppm. **<sup>13</sup>C NMR** (100 MHz,  $CDCl_3$ ):  $\delta$  190.5, 175.0, 146.1, 142.7, 140.8, 135.1, 131.2, 130.9, 129.9, 129.2 (q,  $J$  = 32.0 Hz), 128.6, 128.4, 128.2, 127.9, 126.7, 126.5, 125.3 (q,  $J$  = 3.3 Hz), 125.2, 125.0, 124.8, 124.2 (q,  $J$  = 270.2 Hz), 101.0, 69.1, 68.2, 58.8, 48.3, 41.2, 35.7 ppm. **<sup>19</sup>F NMR** (376 MHz,  $CDCl_3$ )  $\delta$  -62.39 ppm. **HRMS** (ESI)  $m/z$ :  $[M+Na]^+$  calcd. for  $C_{32}H_{25}F_3N_4O_2Na$ : 577.1822; found: 577.1825.

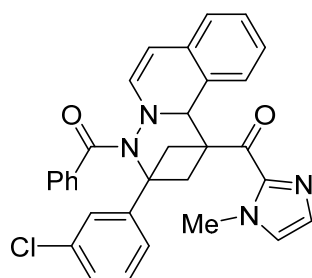**3wa**

$C_{31}H_{25}ClN_4O_2$   
M = 521.02 g/mol

(4-benzoyl-3-(3-chlorophenyl)-3,4-dihydro-2H-1,3-methanopyridazino[6,1-a]isoquinolin-1(11bH)-yl)(1-methyl-1H-imidazol-2-yl)methanone (**3wa**): Prepared from (3-(3-chlorophenyl)bicyclo[1.1.0]butan-1-yl)(1-methyl-1H-imidazol-2-yl)methanone (**1w**, 54.6 mg, 0.20 mmol) and benzoyl(isoquinolin-2-ium-2-yl)amide (**2a**, 59.6 mg, 0.24 mmol) according to the **GP3** at rt for 12 h. Purification by flash chromatography on silica gel using petroleum ether/EtOAc (3/1) afforded **3wa** as a white solid (66.7 mg, 64% yield).

**3wa**:  $R_f$  = 0.3 (petroleum ether/EtOAc = 3/1). Mp: 171-173 °C. **<sup>1</sup>H NMR** (400 MHz,  $CDCl_3$ ):  $\delta$  7.71 (d,  $J$  = 6.4 Hz, 2H), 7.39-7.25 (m, 7H), 7.19-7.18 (m, 2H), 7.00 (s, 1H), 6.95 (t,  $J$  = 7.4 Hz, 1H), 6.86 (d,  $J$  = 8.0 Hz, 1H), 6.79 (d,  $J$  = 6.8 Hz, 1H), 6.57 (t,  $J$  = 7.6 Hz, 1H), 5.89 (d,  $J$  = 7.6 Hz, 1H), 5.65 (s, 1H), 5.32 (d,  $J$  = 7.6 Hz, 1H), 3.74 (s, 3H), 3.72-3.69 (m, 1H), 3.34-3.25 (m, 2H), 2.38 (d,  $J$  = 11.6 Hz, 1H) ppm. **<sup>13</sup>C NMR** (100 MHz,  $CDCl_3$ ):  $\delta$  190.6, 175.0, 144.3, 142.7, 140.9, 135.3, 134.1, 131.2, 130.8, 129.9, 129.5, 128.5, 128.4, 128.3, 127.8, 126.9, 126.6, 126.5, 125.2, 125.0, 124.7, 123.1, 100.8, 69.0, 68.1, 58.8, 48.3, 41.3, 35.7 ppm. **HRMS** (ESI)  $m/z$ :  $[M+H]^+$  calcd. for  $C_{31}H_{26}ClN_4O_2$ : 521.1739; found: 521.1730.

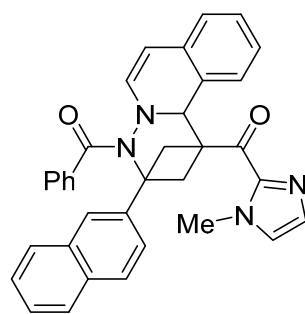**3xa**

$C_{35}H_{28}N_4O_2$   
M = 536.64 g/mol

**(4-benzoyl-3-(naphthalen-2-yl)-3,4-dihydro-2H-1,3-methanopyridazino[6,1-a]isoquinolin-1(11bH)-yl)(1-methyl-1H-imidazol-2-yl)methanone (3xa):** Prepared from (1-methyl-1H-imidazol-2-yl)(3-(naphthalen-2-yl)bicyclo[1.1.0]butan-1-yl)methanone (**1x**, 57.7 mg, 0.20 mmol) and benzoyl(isoquinolin-2-ium-2-yl)amide (**2a**, 59.6 mg, 0.24 mmol) according to the **GP3** at rt for 12 h. Purification by flash chromatography on silica gel using petroleum ether/EtOAc (3/1) afforded **3xa** as a yellow solid (106.0 mg, 99% yield).

**3xa:**  $R_f$  = 0.4 (petroleum ether/EtOAc = 3/1). Mp: 173-175 °C.  **$^1H$  NMR** (400 MHz,  $CDCl_3$ ):  $\delta$  7.85-7.78 (m, 4H), 7.72 (d,  $J$  = 7.2 Hz, 2H), 7.61 (d,  $J$  = 8.0 Hz, 1H), 7.45-7.31 (m, 5H), 7.24 (s, 1H), 7.20 (s, 1H), 6.98-6.93 (m, 3H), 6.79 (d,  $J$  = 7.6 Hz, 1H), 6.58 (t,  $J$  = 7.6 Hz, 1H), 5.91 (d,  $J$  = 7.6 Hz, 1H), 5.72 (s, 1H), 5.35 (d,  $J$  = 7.6 Hz, 1H), 3.82 (t,  $J$  = 11.2 Hz, 1H), 3.73 (s, 3H), 3.50 (d,  $J$  = 10.4 Hz, 1H), 3.40 (t,  $J$  = 10.0 Hz, 1H), 2.45 (d,  $J$  = 11.6 Hz, 1H) ppm.  **$^{13}C$  NMR** (100 MHz,  $CDCl_3$ ):  $\delta$  190.9, 174.9, 142.8, 141.1, 139.7, 135.6, 133.2, 132.4, 131.3, 130.6, 129.8, 128.5, 128.4, 128.3, 128.0, 127.9, 127.8, 127.6, 126.6, 126.5, 125.9, 125.6, 124.9, 124.7, 123.6, 123.3, 100.6, 69.1, 68.7, 58.9, 48.4, 41.5, 35.7 ppm. **HRMS** (ESI)  $m/z$ :  $[M+H]^+$  calcd. for  $C_{35}H_{29}N_4O_2$ : 537.2285; found: 537.2276.

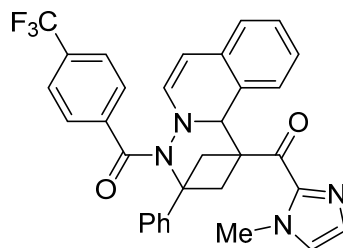**3qd** $C_{32}H_{25}F_3N_4O_2$ 

M = 554.57 g/mol

(1-methyl-1*H*-imidazol-2-yl)(3-phenyl-4-(4-(trifluoromethyl)benzoyl)-3,4-dihydro-2*H*-1,3-methano pyridazino[6,1-*a*]isoquinolin-1(11*bH*)-yl)methanone (**3qd**): Prepared from (1-methyl-1*H*-imidazol-2-yl)(3-phenylbicyclo[1.1.0]butan-1-yl)methanone (**1q**, 47.6 mg, 0.20 mmol) and isoquinolin-2-ium-2-yl(4-(trifluoromethyl)benzoyl)amide (**2d**, 75.9 mg, 0.24 mmol) according to the **GP3** at rt for 12 h. Purification by flash chromatography on silica gel using petroleum ether/EtOAc (3/1) afforded **3qd** as a white solid (95.4 mg, 86% yield).

(**R**)-**3qd**: Prepared from (1-methyl-1*H*-imidazol-2-yl)(3-phenylbicyclo[1.1.0]butan-1-yl)methanone (**1q**, 47.6 mg, 0.20 mmol) and isoquinolin-2-ium-2-yl(4-(trifluoromethyl)benzoyl)amide (**2d**, 75.8 mg, 0.24 mmol) according to the **GP4** at rt for 16 h. Purification by flash chromatography on silica gel using petroleum ether/EtOAc (3/1) afforded (**R**)-**3qd** as a yellow solid (80.9 mg, 73% yield).

**3qd**:  $R_f$  = 0.3 (petroleum ether/EtOAc = 3/1). Mp: 123-125 °C. **<sup>1</sup>H NMR** (400 MHz, CDCl<sub>3</sub>): δ 7.78 (d,  $J$  = 8.0 Hz, 2H), 7.60 (d,  $J$  = 7.6 Hz, 2H), 7.43 (d,  $J$  = 7.2 Hz, 2H), 7.35 (t,  $J$  = 7.6 Hz, 2H), 7.25-7.20 (m, 2H), 7.01 (s, 1H), 6.96 (t,  $J$  = 7.6 Hz, 1H), 6.83-6.78 (m, 2H), 6.59 (t,  $J$  = 7.6 Hz, 1H), 5.89 (d,  $J$  = 7.6 Hz, 1H), 5.64 (s, 1H), 5.34 (d,  $J$  = 8.0 Hz, 1H), 3.77-3.72 (m, 1H), 3.74 (s, 3H), 3.37 (d,  $J$  = 10.4 Hz, 1H), 3.29 (t,  $J$  = 9.2 Hz, 1H), 2.42 (d,  $J$  = 11.2 Hz, 1H) ppm. **<sup>13</sup>C NMR** (100 MHz, CDCl<sub>3</sub>): δ 190.6, 173.7, 142.7, 141.8, 140.4, 139.3, 132.1 (q,  $J$  = 32.4 Hz), 131.0, 129.9, 128.6, 128.4, 128.2, 127.0, 126.6, 126.5, 125.1, 124.90 (q,  $J$  = 3.7 Hz), 124.89, 124.8, 123.7 (q,  $J$  = 270.9 Hz), 101.3, 69.1, 68.8, 58.8, 48.3, 41.2, 35.7 ppm. **<sup>19</sup>F NMR** (376 MHz, CDCl<sub>3</sub>) δ -62.87 ppm. **HRMS** (ESI)  $m/z$ : [M+H]<sup>+</sup> calcd. for C<sub>32</sub>H<sub>26</sub>F<sub>3</sub>N<sub>4</sub>O<sub>2</sub>: 555.2002; found: 555.1993.

**(R)-3qd**:  $R_f = 0.36$  (petroleum ether/EtOAc = 3/1). Mp: 120-122 °C. HPLC analysis (Chiralpak AD-H, *i*PrOH/hexane = 15/85, 1.0 mL/min, 254 nm; tr (major) = 24.62 min, tr (minor) = 26.57 min) gave the isomeric composition of the product: 92% ee.  $[\alpha]_D^{20} = -133.6$  ( $c = 1.10$ ,  $\text{CHCl}_3$ ).

## &lt;Chromatogram&gt;

mV

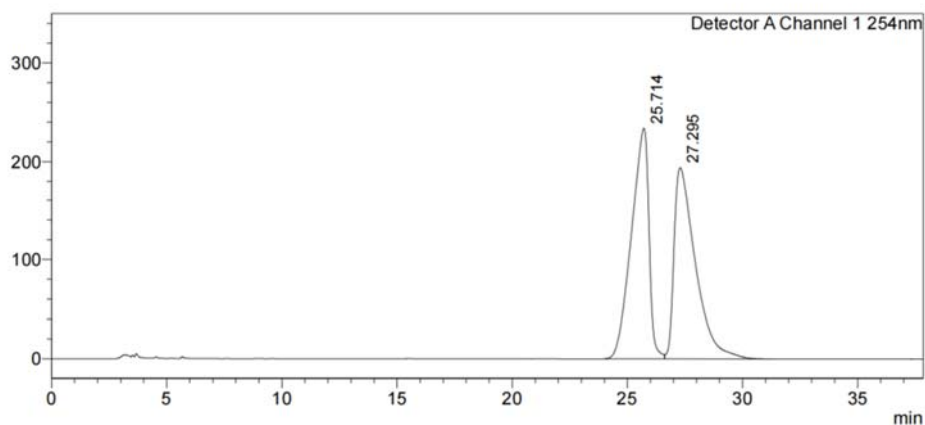

| Peak# | Ret. Time | Peak Start | Area     | Height | Area%   |
|-------|-----------|------------|----------|--------|---------|
| 1     | 25.714    | 24.008     | 12350860 | 234200 | 49.685  |
| 2     | 27.295    | 26.617     | 12507349 | 194259 | 50.315  |
| Total |           |            | 24858209 | 428458 | 100.000 |

## &lt;Chromatogram&gt;

mV

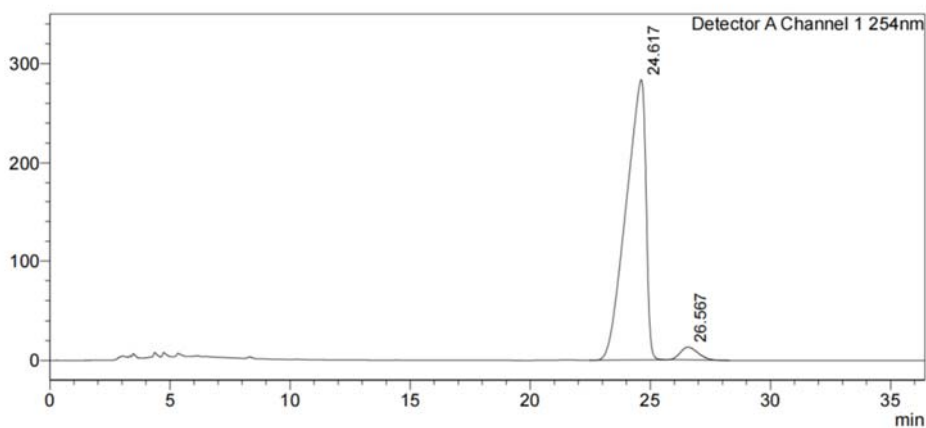

| Peak# | Ret. Time | Area     | Peak Start | Height | Area%   |
|-------|-----------|----------|------------|--------|---------|
| 1     | 24.617    | 16178025 | 22.458     | 283562 | 96.073  |
| 2     | 26.567    | 661205   | 25.783     | 12899  | 3.927   |
| Total |           | 16839229 |            | 296460 | 100.000 |

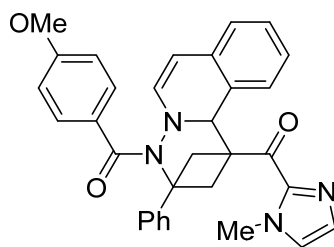**3qe** $C_{32}H_{28}N_4O_3$ 

M = 516.60 g/mol

**(4-(4-methoxybenzoyl)-3-phenyl-3,4-dihydro-2H-1,3-methanopyridazino[6,1-a]isoquinolin-1(11bH)-yl)(1-methyl-1H-imidazol-2-yl)methanone (3qe)**: Prepared from (1-methyl-1H-imidazol-2-yl)(3-phenylbicyclo[1.1.0]butan-1-yl)methanone (**1q**, 47.7 mg, 0.20 mmol) and isoquinolin-2-ium-2-yl(4-methoxybenzoyl)amide (**2e**, 66.8 mg, 0.24 mmol) according to the **GP3** at rt for 12 h. Purification by flash chromatography on silica gel using petroleum ether/EtOAc (3/1) afforded **3qe** as a yellow solid (102.3 mg, 99% yield).

**(R)-3qe**: Prepared from (1-methyl-1H-imidazol-2-yl)(3-phenylbicyclo[1.1.0]butan-1-yl)methanone (**1q**, 47.7 mg, 0.20 mmol) and isoquinolin-2-ium-2-yl(4-methoxybenzoyl)amide (**2e**, 66.8 mg, 0.24 mmol) according to the **GP4** at rt for 16 h. Purification by flash chromatography on silica gel using petroleum ether/EtOAc (3/1) afforded **(R)-3qe** as a yellow solid (80.3 mg, 78% yield).

**3qe**:  $R_f$  = 0.2 (petroleum ether/EtOAc = 3/1). Mp: 167-169 °C. **<sup>1</sup>H NMR** (400 MHz, CDCl<sub>3</sub>): δ 7.75 (d,  $J$  = 8.8 Hz, 2H), 7.42 (d,  $J$  = 6.8 Hz, 2H), 7.33 (t,  $J$  = 7.6 Hz, 2H), 7.25 (s, 1H), 7.22-7.19 (m, 2H), 6.99 (s, 1H), 6.97-6.91 (m, 2H), 6.84-6.79 (m, 3H), 6.57 (t,  $J$  = 7.6 Hz, 1H), 5.88 (d,  $J$  = 7.6 Hz, 1H), 5.67 (s, 1H), 5.34 (d,  $J$  = 7.6 Hz, 1H), 3.78 (s, 3H), 3.75-7.70 (m, 4H), 3.37-3.27 (m, 2H), 2.39 (d,  $J$  = 11.2 Hz, 1H) ppm. **<sup>13</sup>C NMR** (100 MHz, CDCl<sub>3</sub>): δ 191.0, 173.9, 161.6, 142.8, 142.5, 141.3, 131.4, 131.0, 129.8, 128.50, 128.45, 128.1, 127.4, 126.7, 126.5, 126.5, 124.9, 124.8, 124.6, 113.0, 100.5, 69.0, 68.7, 59.0, 55.2, 48.3, 41.5, 35.7 ppm. **HRMS** (ESI)  $m/z$ : [M+H]<sup>+</sup> calcd. for C<sub>32</sub>H<sub>29</sub>N<sub>4</sub>O<sub>3</sub>: 517.2234; found: 517.2227.



HPLC analysis (Chiralpak AS-H, *i*PrOH/hexane = 15/85, 1.0 mL/min, 254 nm; tr (major) = 19.91 min, tr (minor) = 35.23 min gave the isomeric composition of the product: 6% ee.  $[\alpha]_D^{20} = -50.4$  ( $c = 1.00$ ,  $\text{CHCl}_3$ ).

**<Chromatogram>**

mV

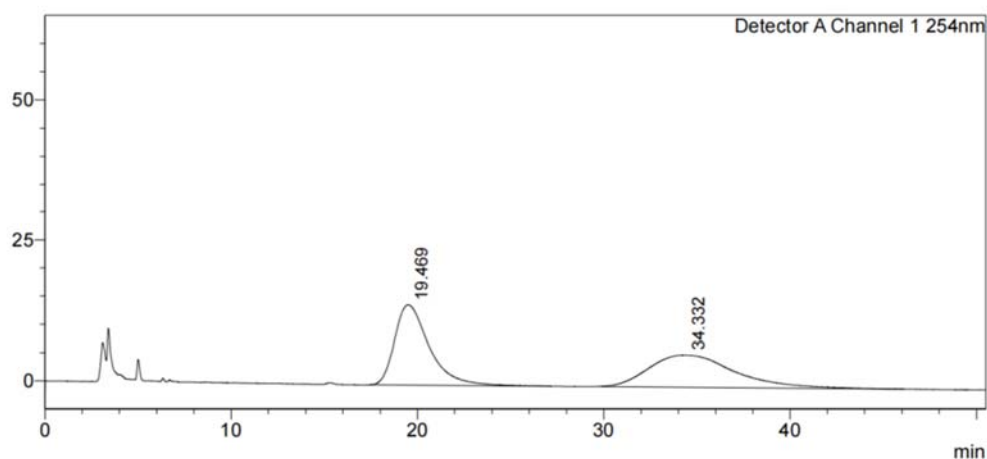

| Peak# | Ret. Time | Peak Start | Area    | Height | Area%   |
|-------|-----------|------------|---------|--------|---------|
| 1     | 19.469    | 17.433     | 1837384 | 14185  | 50.183  |
| 2     | 34.332    | 29.858     | 1823997 | 5693   | 49.817  |
| Total |           |            | 3661381 | 19878  | 100.000 |

**<Chromatogram>**

mV

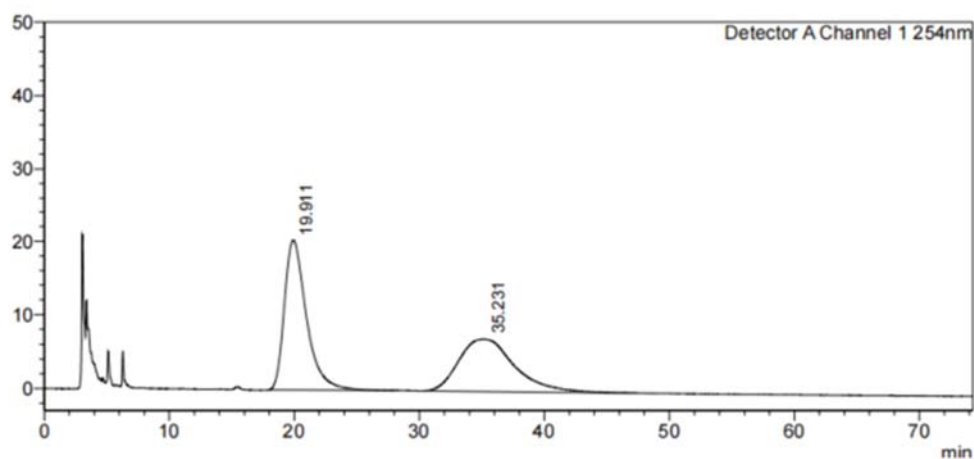

| Peak# | Ret. Time | Peak Start | Area    | Height | Area%   |
|-------|-----------|------------|---------|--------|---------|
| 1     | 19.911    | 17.950     | 2494200 | 20344  | 53.001  |
| 2     | 35.231    | 30.350     | 2211725 | 7148   | 46.999  |
| Total |           |            | 4705924 | 27491  | 100.000 |

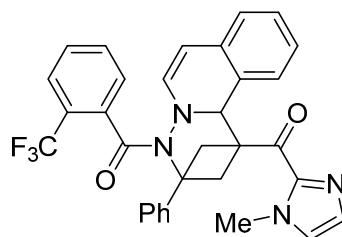**3qf**

$C_{32}H_{25}F_3N_4O_2$   
M = 554.57 g/mol

**(1-methyl-1*H*-imidazol-2-yl)(3-phenyl-4-(2-(trifluoromethyl)benzoyl)-3,4-dihydro-2*H*-1,3-methanopyridazino[6,1-*a*]isoquinolin-1(11*bH*)-yl)methanone (3qf)**: Prepared from (1-methyl-1*H*-imidazol-2-yl)(3-phenylbicyclo[1.1.0]butan-1-yl)methanone (**1q**, 47.7 mg, 0.20 mmol) and isoquinolin-2-ium-2-yl(2-(trifluoromethyl)benzoyl)amide (**2f**, 75.9 mg, 0.24 mmol) according to the **GP3** at rt for 12 h. Purification by flash chromatography on silica gel using petroleum ether/EtOAc (3/1) afforded **3qf** as a white solid (109.8 mg, 99% yield).

**(*R*)-3qf**: Prepared from (1-methyl-1*H*-imidazol-2-yl)(3-phenylbicyclo[1.1.0]butan-1-yl)methanone (**1q**, 47.7 mg, 0.20 mmol) and isoquinolin-2-ium-2-yl(2-(trifluoromethyl)benzoyl)amide (**2f**, 75.9 mg, 0.24 mmol) according to the **GP4** at rt for 16 h. Purification by flash chromatography on silica gel using petroleum ether/EtOAc (3/1) afforded **(*R*)-3qf** as a white solid (100.2 mg, 90% yield).

**3qf**:  $R_f$  = 0.3 (petroleum ether/EtOAc = 3/1). Mp: 295-297 °C. **<sup>1</sup>H NMR** (400 MHz,  $CDCl_3$ ):  $\delta$  7.63 (d,  $J$  = 7.6 Hz, 1H), 7.54-7.47 (m, 2H), 7.44-7.40 (m, 3H), 7.35 (t,  $J$  = 7.4 Hz, 2H), 7.22 (d,  $J$  = 13.2 Hz, 2H), 6.98 (s, 1H), 6.91 (t,  $J$  = 7.2 Hz, 1H), 6.70 (d,  $J$  = 7.6 Hz, 1H), 6.63 (d,  $J$  = 8 Hz, 1H), 6.59 (t,  $J$  = 7.6 Hz, 1H), 5.97 (d,  $J$  = 7.6 Hz, 1H), 5.83 (s, 1H), 5.17 (d,  $J$  = 7.6 Hz, 1H), 3.74 (s, 3H), 3.72-3.70 (m, 1H), 3.37-3.34 (m, 2H), 2.42 (d,  $J$  = 11.2 Hz, 1H) ppm. **<sup>13</sup>C NMR** (100 MHz,  $CDCl_3$ ):  $\delta$  190.8, 172.3, 142.7, 141.5, 140.2, 135.9 (q,  $J$  = 2.5 Hz), 131.3, 131.1, 130.0, 129.0, 128.5, 128.4, 128.2, 126.9, 126.7 (q,  $J$  = 4.7 Hz), 126.53, 126.52, 124.9, 124.8, 124.6, 124.0 (q,  $J$  = 272.3 Hz), 101.1, 68.2, 68.0, 58.5, 47.5, 41.5, 35.6 ppm. **<sup>19</sup>F NMR** (376 MHz,  $CDCl_3$ )  $\delta$  -57.72 ppm. **HRMS** (ESI)  $m/z$ :  $[M+H]^+$  calcd. for  $C_{32}H_{26}F_3N_4O_2$ : 555.2002; found: 555.1996.

HPLC analysis (Chiralpak OD-H, *i*PrOH/hexane = 10/90, 1.0 mL/min, 254 nm; tr (major) = 17.98 min, tr (minor) = 20.94 min gave the isomeric composition of the product: 76% ee.  $[\alpha]_D^{20} = -71.4$  ( $c = 1.00$ ,  $\text{CHCl}_3$ ).

## &lt;Chromatogram&gt;

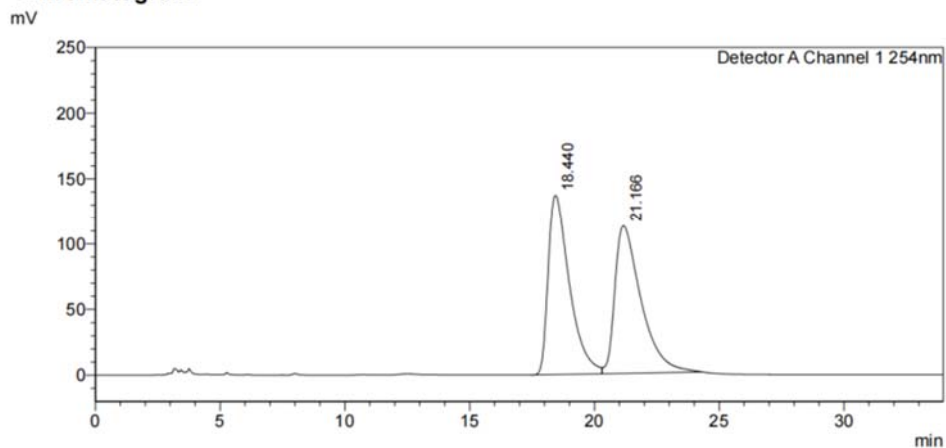

| Peak# | Ret. Time | Peak Start | Area     | Height | Area%   |
|-------|-----------|------------|----------|--------|---------|
| 1     | 18.440    | 17.458     | 8120635  | 136956 | 49.694  |
| 2     | 21.166    | 20.300     | 8220501  | 112408 | 50.306  |
| Total |           |            | 16341136 | 249364 | 100.000 |

## &lt;Chromatogram&gt;

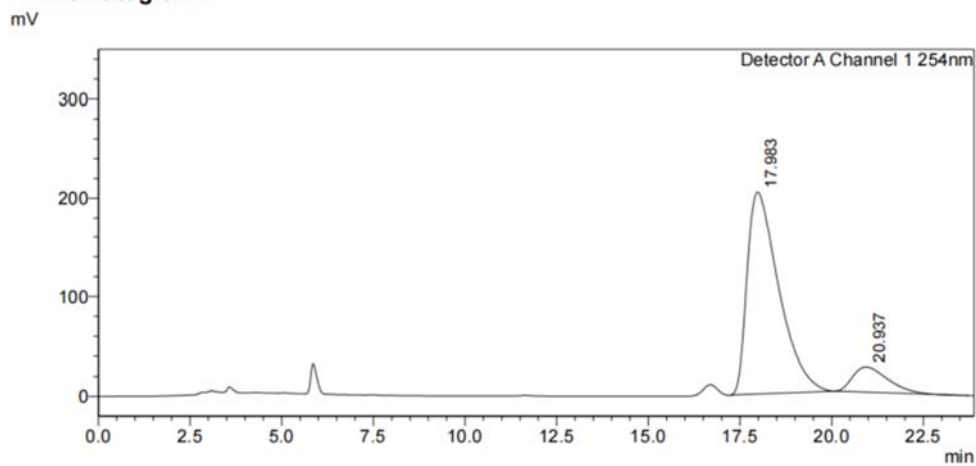

| Peak# | Ret. Time | Peak Start | Area     | Height | Area%   |
|-------|-----------|------------|----------|--------|---------|
| 1     | 17.983    | 17.258     | 12227016 | 203819 | 87.830  |
| 2     | 20.937    | 20.125     | 1694272  | 25334  | 12.170  |
| Total |           |            | 13921288 | 229152 | 100.000 |

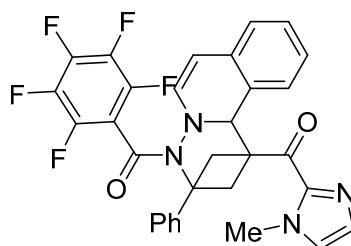**3qg**

$C_{31}H_{21}F_5N_4O_2$   
M = 576.53 g/mol

(1-methyl-1*H*-imidazol-2-yl)(4-(perfluorobenzoyl)-3-phenyl-3,4-dihydro-2*H*-1,3-methano pyridazino [6,1-*a*]isoquinolin-1(11*bH*)-yl)methanone (**3qg**): Prepared from (1-methyl-1*H*-imidazol-2-yl)(3-phenylbicyclo[1.1.0]butan-1-yl)methanone (**1q**, 47.7 mg, 0.20 mmol) and isoquinolin-2-ium-2-yl(perfluorobenzoyl)amide (**2g**, 81.2 mg, 0.24 mmol) according to the **GP3** at rt for 12 h. Purification by flash chromatography on silica gel using petroleum  $CH_2Cl_2$  afforded **3qg** as a white solid (49.6 mg, 43% yield).

(*R*)-**3qg**: Prepared from (1-methyl-1*H*-imidazol-2-yl)(3-phenylbicyclo[1.1.0]butan-1-yl)methanone (**1q**, 47.7 mg, 0.20 mmol) and isoquinolin-2-ium-2-yl(perfluorobenzoyl)amide (**2g**, 81.2 mg, 0.24 mmol) according to the **GP4** at rt for 16 h. Purification by flash chromatography on silica gel using petroleum  $CH_2Cl_2$  afforded (*R*)-**3qg** as a white solid (37.5 mg, 33% yield).

**3qg**:  $R_f$  = 0.35 (petroleum ether/EtOAc = 3/1). Mp: 231-233 °C.  $^1H$  NMR (400 MHz,  $CDCl_3$ ):  $\delta$  7.41-7.36 (m, 4H), 7.29-7.26 (m, 1H), 7.21 (s, 1H), 7.02 (s, 1H), 6.98 (t,  $J$  = 8.4 Hz, 1H), 6.78 (d,  $J$  = 76 Hz, 1H), 6.65 (t,  $J$  = 7.6 Hz, 1H), 6.58 (d,  $J$  = 7.6 Hz, 1H), 6.50 (d,  $J$  = 7.6 Hz, 1H), 5.82 (s, 1H), 5.27 (d,  $J$  = 8.0 Hz, 1H), 3.77 (s, 3H), 3.75 (t,  $J$  = 11.2 Hz, 1H), 3.38 (d,  $J$  = 10.4 Hz, 1H), 3.26 (t,  $J$  = 9.2 Hz, 1H), 2.44 (d,  $J$  = 11.6 Hz, 1H) ppm.  $^{13}C$  NMR (150 MHz,  $CDCl_3$ ):  $\delta$  190.3, 162.5, 144.6-144.4 (m), 143.1-142.78 (m), 142.6, 141.5-141.2 (m), 140.5, 139.1, 138.6-138.0 (m), 136.9-136.3 (m), 130.8, 130.1, 128.8, 128.4, 128.1, 127.3, 126.7, 126.7, 125.3, 124.94, 124.7, 113.1 (t,  $J$  = 23.7 Hz), 102.2, 76.8, 69.3, 69.0, 58.4, 48.7, 41.4, 35.6 ppm.  $^{19}F$  NMR (376 MHz,  $CDCl_3$ ):  $\delta$  -141.48 (d,  $J$  = 22.2 Hz), -142.50 (d,  $J$  = 21.4 Hz), -152.82 (t,  $J$  = 20.7 Hz), -

159.88 (td,  $J = 22.2, 7.90$  Hz), -160.96 (td,  $J = 22.6, 7.90$  Hz) ppm. **HRMS** (ESI)  $m/z$ :  
 $[M+H]^+$  calcd. for  $C_{31}H_{22}F_5N_4O_2$ : 577.1657 found: 577.1652.

HPLC analysis (Chiralpak AD-H,  $i$ PrOH/hexane = 10/90, 1.0 mL/min, 254 nm;  $t_r$  (major) = 10.93 min,  $t_r$  (minor) = 13.94 min gave the isomeric composition of the product: 54% ee.  $[\alpha]_D^{20} = -31.0$  ( $c = 0.05$ ,  $CHCl_3$ ).

&lt;Chromatogram&gt;

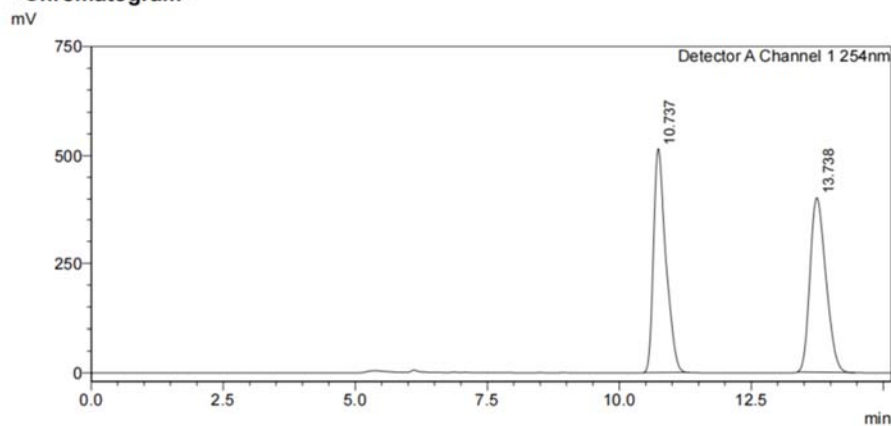

| Peak# | Ret. Time | Peak Start | Area     | Height | Area%   |
|-------|-----------|------------|----------|--------|---------|
| 1     | 10.737    | 10.458     | 8388065  | 514952 | 50.061  |
| 2     | 13.738    | 13.375     | 8367490  | 401547 | 49.939  |
| Total |           |            | 16755554 | 916499 | 100.000 |

&lt;Chromatogram&gt;

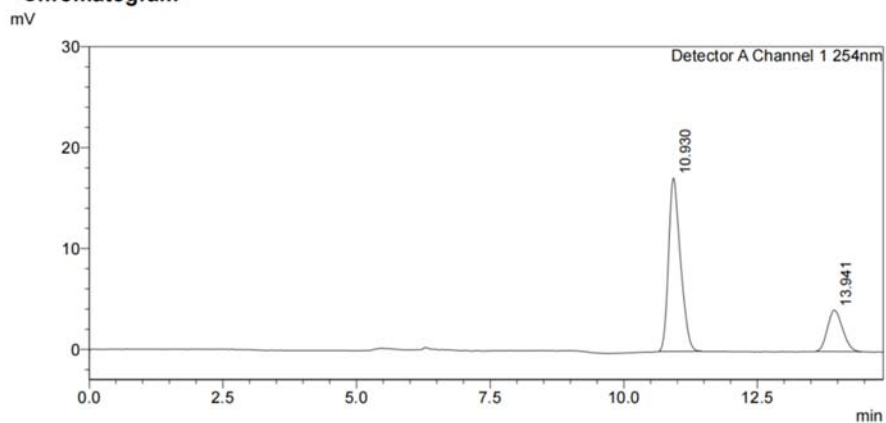

| Peak# | Ret. Time | Peak Start | Area   | Height | Area%   |
|-------|-----------|------------|--------|--------|---------|
| 1     | 10.930    | 10.650     | 266565 | 17168  | 76.790  |
| 2     | 13.941    | 13.583     | 80572  | 4098   | 23.210  |
| Total |           |            | 347137 | 21266  | 100.000 |

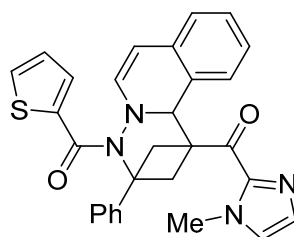**3qh** $C_{29}H_{24}N_4O_2S$ 

M = 492.60 g/mol

**(1-methyl-1H-imidazol-2-yl)(3-phenyl-4-(thiophene-2-carbonyl)-3,4-dihydro-2H-1,3-methanopyridazino[6,1-a]isoquinolin-1(11bH)-yl)methanone (3qh):** Prepared from (1-methyl-1H-imidazol-2-yl)(3-phenylbicyclo[1.1.0]butan-1-yl)methanone (**1q**, 47.6 mg, 0.20 mmol) and isoquinolin-2-ium-2-yl(thiophene-2-carbonyl)amide (**2h**, 61.0 mg, 0.24 mmol) according to the **GP3** at rt for 12 h. Purification by flash chromatography on silica gel using petroleum ether/EtOAc (3/1) afforded **3qh** as a yellow solid (78.8 mg, 80% yield).

**3qh:**  $R_f$  = 0.3 (petroleum ether/EtOAc = 3/1). Mp: 295-297 °C.  **$^1H$  NMR** (400 MHz,  $CDCl_3$ ):  $\delta$  7.98-7.97 (m, 1H), 7.43 (d,  $J$  = 4.4 Hz, 1H), 7.38-7.32 (m, 4H), 7.24-7.21 (m, 1H), 7.17 (s, 1H), 7.05-7.01 (m, 3H), 6.90 (d,  $J$  = 7.2 Hz, 1H), 6.70 (d,  $J$  = 7.6 Hz, 1H), 6.65 (t,  $J$  = 7.2 Hz, 1H), 5.99-5.96 (m, 2H), 5.49 (d,  $J$  = 7.6 Hz, 1H), 3.77 (s, 3H), 3.72 (t,  $J$  = 11.2 Hz, 1H), 3.36 (d,  $J$  = 10.4 Hz, 1H), 3.23 (t,  $J$  = 10.4 Hz, 1H), 2.38 (d,  $J$  = 11.2 Hz, 1H) ppm.  **$^{13}C$  NMR** (100 MHz,  $CDCl_3$ ):  $\delta$  190.6, 165.7, 142.7, 142.4, 140.1, 135.8, 133.8, 133.5, 131.2, 129.8, 128.7, 128.4, 128.3, 126.8, 126.6, 125.2, 125.0, 124.5, 102.0, 69.0, 68.4, 58.7, 48.7, 41.1, 35.7 ppm. **HRMS** (ESI)  $m/z$ :  $[M+Na]^+$  calcd. for  $C_{29}H_{24}N_4O_2SNa$ : 515.1512; found: 515.1516.

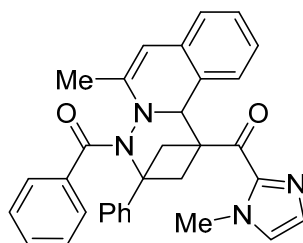**3qi** $C_{32}H_{28}N_4O_2$ 

M = 500.60 g/mol

(4-benzoyl-6-methyl-3-phenyl-3,4-dihydro-2H-1,3-methanopyridazino[6,1-a]isoquinolin-1(11bH)-yl)(1-methyl-1H-imidazol-2-yl)methanone (**3qi**): Prepared from (1-methyl-1H-imidazol-2-yl)(3-phenylbicyclo[1.1.0]butan-1-yl)methanone (**1q**, 47.7 mg, 0.20 mmol) and benzoyl(3-methylisoquinolin-2-ium-2-yl)amide (**2i**, 63.0 mg, 0.24 mmol) in 40 °C according to the **GP3** at rt for 12 h. Purification by flash chromatography on silica gel using petroleum ether/EtOAc (3/1) afforded **3qi** as a white solid (47.0 mg, 47% yield).

**3qi**:  $R_f$  = 0.3 (petroleum ether/EtOAc = 3/1). Mp: 207-209 °C. **<sup>1</sup>H NMR** (400 MHz, CDCl<sub>3</sub>): δ 7.81 (d,  $J$  = 6.8 Hz, 2H), 7.47 (d,  $J$  = 7.2 Hz, 2H), 7.39-7.30 (m, 5H), 7.25-7.21 (m, 1H), 7.18 (s, 1H), 6.99 (s, 1H), 6.94 (t,  $J$  = 7.6 Hz, 1H), 6.73 (d,  $J$  = 7.6 Hz, 1H), 6.55 (t,  $J$  = 7.6 Hz, 1H), 5.95 (d,  $J$  = 7.6 Hz, 1H), 5.85 (s, 1H), 5.14 (s, 1H), 3.74 (s, 3H), 3.47-3.31 (m, 3H), 2.43 (d,  $J$  = 11.2 Hz, 1H), 2.24 (s, 3H) ppm. **<sup>13</sup>C NMR** (100 MHz, CDCl<sub>3</sub>): δ 191.2, 173.5, 145.1, 142.8, 142.0, 135.6, 132.6, 130.3, 129.8, 128.4, 128.2, 128.1, 127.9, 127.7, 126.7, 126.5, 126.0, 125.2, 123.8, 123.7, 99.7, 70.8, 69.7, 58.4, 50.1, 40.8, 35.7, 19.5 ppm. **HRMS** (ESI)  $m/z$ : [M+H]<sup>+</sup> calcd. for C<sub>32</sub>H<sub>29</sub>N<sub>4</sub>O<sub>2</sub>: 501.2285; found: 501.2279.

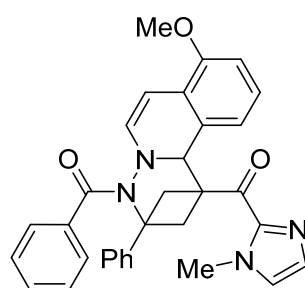**3qj**

C<sub>32</sub>H<sub>28</sub>N<sub>4</sub>O<sub>3</sub>  
M = 516.60 g/mol

(4-benzoyl-8-methoxy-3-phenyl-3,4-dihydro-2H-1,3-methanopyridazino[6,1-a]isoquinolin-1(11bH)-yl)(1-methyl-1H-imidazol-2-yl)methanone (**3qj**): Prepared from (1-methyl-1H-imidazol-2-yl)(3-phenylbicyclo[1.1.0]butan-1-yl)methanone (**1q**, 47.7 mg, 0.20 mmol) and benzoyl(5-methoxyisoquinolin-2-ium-2-yl)amide (**2j**, 66.8 mg, 0.24 mmol) according to the **GP3** at rt for 12 h. Purification by flash chromatography on silica gel using petroleum ether/EtOAc (3/1) afforded **3qj** as a white solid (96.1 mg, 93% yield).

**3qj**:  $R_f = 0.2$  (petroleum ether/EtOAc = 3/1). Mp: 267-269 °C.  $^1\text{H NMR}$  (400 MHz,  $\text{CDCl}_3$ ):  $\delta$  7.70 (d,  $J = 7.2$  Hz, 2H), 7.44 (d,  $J = 7.6$  Hz, 2H), 7.38-7.30 (m, 5H), 7.23-7.19 (m, 2H), 6.98 (s, 1H), 6.88 (d,  $J = 8.0$  Hz, 1H), 6.54 (t,  $J = 8.0$  Hz, 1H), 6.49 (d,  $J = 8.4$  Hz, 1H), 5.68 (d,  $J = 8.0$  Hz, 1H), 5.65 (s, 1H), 5.48 (d,  $J = 7.6$  Hz, 1H), 3.73 (s, 3H), 3.72 (s, 3H), 3.73-3.69 (m, 1H), 3.38-3.28 (m, 2H), 2.37 (d,  $J = 11.2$  Hz, 1H) ppm.  $^{13}\text{C NMR}$  (100 MHz,  $\text{CDCl}_3$ ):  $\delta$  190.7, 174.8, 153.2, 142.8, 142.2, 140.3, 135.6, 130.5, 129.7, 129.4, 128.4, 128.1, 127.7, 126.7, 126.5, 125.6, 124.8, 120.6, 118.9, 110.2, 94.5, 68.9, 68.6, 59.0, 55.3, 48.4, 41.4, 35.7 ppm. **HRMS** (ESI)  $m/z$ :  $[\text{M}+\text{H}]^+$  calcd. for  $\text{C}_{32}\text{H}_{29}\text{N}_4\text{O}_3$ : 517.2234; found: 517.2225.

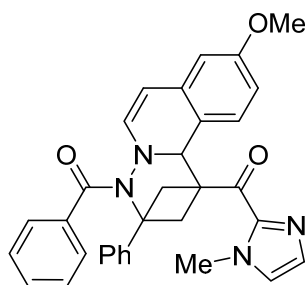**3qk**

$\text{C}_{32}\text{H}_{28}\text{N}_4\text{O}_3$   
M = 516.60 g/mol

**(4-benzoyl-9-methoxy-3-phenyl-3,4-dihydro-2H-1,3-methanopyridazino[6,1-a]isoquinolin-1(11bH)-yl)(1-methyl-1H-imidazol-2-yl)methanone (3qk)**: Prepared from (1-methyl-1H-imidazol-2-yl)(3-phenylbicyclo[1.1.0]butan-1-yl)methanone (**1q**, 47.7 mg, 0.20 mmol) and benzoyl(6-methoxyisoquinolin-2-ium-2-yl)amide (**2k**, 66.8 mg, 0.24 mmol) according to the **GP3** at rt for 12 h. Purification by flash chromatography on silica gel using petroleum ether/EtOAc (3/1) afforded **3qk** as a white solid (100.2 mg, 97% yield).

**3qk**:  $R_f = 0.2$  (petroleum ether/EtOAc = 3/1). Mp: 259-261 °C.  $^1\text{H NMR}$  (400 MHz,  $\text{CDCl}_3$ ):  $\delta$  7.69 (d,  $J = 7.2$  Hz, 2H), 7.43 (d,  $J = 7.6$  Hz, 2H), 7.40-7.32 (m, 5H), 7.23-7.20 (m, 2H), 6.99 (s, 1H), 6.89 (d,  $J = 8.0$  Hz, 1H), 6.32 (s, 1H), 6.11 (d,  $J = 8.4$  Hz, 1H), 5.78 (d,  $J = 8.4$  Hz, 1H), 5.65 (s, 1H), 5.27 (d,  $J = 8.0$  Hz, 1H), 3.75 (s, 3H), 3.69-3.66 (m, 1H), 3.64 (s, 3H), 3.36-3.27 (m, 2H), 2.37 (d,  $J = 11.2$  Hz, 1H) ppm.  $^{13}\text{C NMR}$  (100 MHz,  $\text{CDCl}_3$ ):  $\delta$  191.0, 174.8, 159.5, 142.7, 142.2, 141.5, 135.7, 132.5, 130.6, 129.8, 128.3, 128.1, 127.8, 127.6, 126.7, 126.5, 124.8, 120.7, 110.7, 109.4, 100.4,



68.71, 68.65, 58.9, 55.0, 48.2, 41.1, 35.7 ppm. **HRMS** (ESI)  $m/z$ :  $[M+H]^+$  calcd. for  $C_{32}H_{29}N_4O_3$ : 517.2234; found: 517.2230.

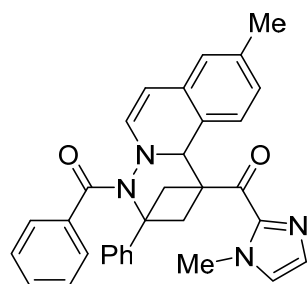**3pl**

$C_{32}H_{28}N_4O_2$   
M = 500.60 g/mol

**(4-benzoyl-9-methyl-3-phenyl-3,4-dihydro-2H-1,3-methanopyridazino[6,1-a]isoquinolin-1(11bH)-yl)(1-methyl-1H-imidazol-2-yl)methanone (3pl)**: Prepared from (1-methyl-1H-imidazol-2-yl)(3-phenylbicyclo[1.1.0]butan-1-yl)methanone (**1q**, 47.7 mg, 0.20 mmol) and benzoyl(6-methylisoquinolin-2-ium-2-yl)amide (**2l**, 62.9 mg, 0.24 mmol) according to the **GP3** at rt for 12 h. Purification by flash chromatography on silica gel using petroleum ether/EtOAc (3/1) afforded **3pl** as a white solid (72.1 mg, 72% yield).

**3pl**:  $R_f$  = 0.3 (petroleum ether/EtOAc = 3/1). Mp: 287-289 °C.  **$^1H$  NMR** (400 MHz,  $CDCl_3$ ):  $\delta$  7.70 (d,  $J$  = 6.8 Hz, 2H), 7.43 (d,  $J$  = 7.2 Hz, 2H), 7.39-7.32 (m, 5H), 7.23-7.19 (m 2H), 7.00 (s, 1H), 6.86 (d,  $J$  = 8.0 Hz, 1H), 6.61 (s, 1H), 6.39 (d,  $J$  = 8.0 Hz, 1H), 5.76 (d,  $J$  = 8.0 Hz, 1H), 5.66 (s, 1H), 5.27 (d,  $J$  = 8.0 Hz, 1H), 3.76 (s, 3H), 3.69 (dd,  $J$  = 10.8, 8.4 Hz, 1H), 3.36-3.28 (m, 2H), 2.37 (d,  $J$  = 11.6 Hz, 1H), 2.11 (s, 3H) ppm.  **$^{13}C$  NMR** (100 MHz,  $CDCl_3$ ):  $\delta$  191.0, 174.9, 142.8, 142.2, 141.0, 138.1, 135.7, 131.0, 130.5, 129.8, 128.3, 128.1, 127.7, 126.7, 126.5, 126.4, 125.6, 125.5, 124.8, 100.5, 68.8, 68.6, 58.9, 48.3, 41.1, 35.7, 20.9 ppm. **HRMS** (ESI)  $m/z$ :  $[M+Na]^+$  calcd. for  $C_{32}H_{28}N_4O_2Na$ : 523.2104; found: 523.2105.

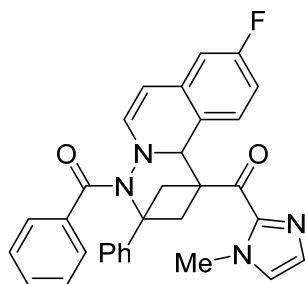**3qm**

$C_{31}H_{25}FN_4O_2$   
M = 504.57 g/mol

**(4-benzoyl-9-fluoro-3-phenyl-3,4-dihydro-2H-1,3-methanopyridazino[6,1-a]isoquinolin-1(11bH)-yl)(1-methyl-1H-imidazol-2-yl)methanone (3qm):** Prepared from (1-methyl-1H-imidazol-2-yl)(3-phenylbicyclo[1.1.0]butan-1-yl)methanone (**1q**, 47.7 mg, 0.20 mmol) and benzoyl(6-fluoroisoquinolin-2-ium-2-yl)amide (**2m**, 63.9 mg, 0.24 mmol) according to the **GP3** at rt for 12 h. Purification by flash chromatography on silica gel using petroleum ether/EtOAc (3/1) afforded **3qm** as a white solid (93.9 mg, 93% yield).

**3qm:**  $R_f$  = 0.3 (petroleum ether/EtOAc = 3/1). Mp: 277-279 °C.  **$^1H$  NMR** (400 MHz,  $CDCl_3$ ):  $\delta$  7.68 (d,  $J$  = 6.4 Hz, 2H), 7.42 (d,  $J$  = 7.2 Hz, 2H), 7.39-7.32 (m, 5H), 7.24-7.19 (m, 2H), 6.99 (s, 1H), 6.92 (d,  $J$  = 8.0 Hz, 1H), 6.47 (dd,  $J$  = 9.6, 2.8 Hz, 1H), 6.24 (td,  $J$  = 8.4, 2.4 Hz, 1H), 5.88 (dd,  $J$  = 8.8, 6.0 Hz, 1H), 5.67 (s, 1H), 5.25 (d,  $J$  = 7.6 Hz, 1H), 3.76 (s, 3H), 3.67 (dd,  $J$  = 11.6, 8.4 Hz, 1H), 3.36-3.26 (m, 2H), 2.41 (d,  $J$  = 11.6 Hz, 1H) ppm.  **$^{13}C$  NMR** (100 MHz,  $CDCl_3$ ):  $\delta$  190.8, 174.8, 162.6 (d,  $J$  = 244.9 Hz), 142.6, 142.0 (d,  $J$  = 2.5 Hz), 135.6, 133.7 (d,  $J$  = 8.7 Hz), 130.7, 129.9, 128.3, 128.2, 128.1, 128.0, 127.8, 126.8, 126.7, 124.8, 124.0 (d,  $J$  = 3.1 Hz), 111.3 (d,  $J$  = 4.2 Hz), 111.0 (d,  $J$  = 3.6 Hz), 99.7 (d,  $J$  = 2.3 Hz), 68.7, 58.8, 48.2, 41.5, 35.7 ppm.  **$^{19}F$  NMR** (376 MHz,  $CDCl_3$ ):  $\delta$  -114.10 ppm. **HRMS** (ESI)  $m/z$ :  $[M+H]^+$  calcd. for  $C_{31}H_{26}FN_4O_2$ : 505.2034; found: 505.2025.

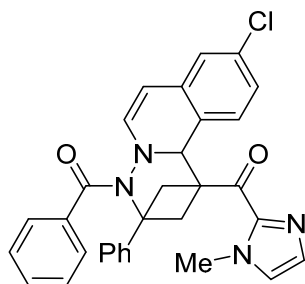**3qn**

$C_{31}H_{25}ClN_4O_2$   
 M = 521.02 g/mol

**(4-benzoyl-9-chloro-3-phenyl-3,4-dihydro-2H-1,3-methanopyridazino[6,1-a]isoquinolin-1(11bH)-yl)(1-methyl-1H-imidazol-2-yl)methanone (3qn):** Prepared from (1-methyl-1H-imidazol-2-yl)(3-phenylbicyclo[1.1.0]butan-1-yl)methanone (**1q**, 47.7 mg, 0.20 mmol) and benzoyl(6-chloroisoquinolin-2-ium-2-yl)amide (**2n**, 67.8 mg, 0.24 mmol) according to the **GP3** at rt for 12 h. Purification by flash chromatography on silica gel using petroleum ether/EtOAc (3/1) afforded **3qn** as a white solid (70.9 mg, 68% yield).

**3qn:**  $R_f$  = 0.3 (petroleum ether/EtOAc = 3/1). Mp: 266-268 °C. **<sup>1</sup>H NMR** (400 MHz,  $CDCl_3$ ):  $\delta$  7.68 (d,  $J$  = 7.2 Hz, 2H), 7.43-7.34 (m, 7H), 7.24-7.20 (m, 2H), 7.01 (s, 1H), 6.92 (d,  $J$  = 7.6 Hz, 1H), 6.75 (s, 1H), 6.52 (d,  $J$  = 8.4 Hz, 1H), 5.84 (d,  $J$  = 8.0 Hz, 1H), 5.66 (s, 1H), 5.24 (d,  $J$  = 7.6 Hz, 1H), 3.79 (s, 3H), 3.66 (dd,  $J$  = 10.8, 8.8 Hz, 1H), 3.35-3.25 (m, 2H), 2.41 (d,  $J$  = 11.2 Hz, 1H) ppm. **<sup>13</sup>C NMR** (100 MHz,  $CDCl_3$ ):  $\delta$  190.7, 174.8, 142.6, 142.2, 142.0, 135.5, 134.2, 133.2, 130.7, 129.9, 128.3, 128.2, 127.8, 127.8, 126.9, 126.7, 124.8, 124.5, 124.4, 99.4, 68.6, 58.9, 48.3, 41.5, 35.8 ppm. **HRMS** (ESI)  $m/z$ :  $[M+Na]^+$  calcd. for  $C_{31}H_{25}ClN_4O_2Na$ : 543.1558; found: 543.1555.

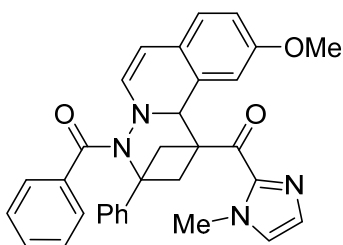**3qo**

$C_{32}H_{28}N_4O_3$   
 M = 516.60 g/mol

(4-benzoyl-10-methoxy-3-phenyl-3,4-dihydro-2H-1,3-methanopyridazino[6,1-a]isoquinolin-1(11bH)-yl)(1-methyl-1H-imidazol-2-yl)methanone (**3qo**): Prepared from (1-methyl-1H-imidazol-2-yl)(3-phenylbicyclo[1.1.0]butan-1-yl)methanone (**1q**, 47.7 mg, 0.20 mmol) and benzoyl(7-methoxyisoquinolin-2-ium-2-yl)amide (**2o**, 66.8 mg, 0.24 mmol) according to the **GP3** at rt for 12 h. Purification by flash chromatography on silica gel using petroleum ether/EtOAc (3/1) afforded **3qo** as a yellow solid (102.3 mg, 99% yield).

**3qo**:  $R_f$  = 0.2 (petroleum ether/EtOAc = 3/1). Mp: 156-159 °C. **<sup>1</sup>H NMR** (400 MHz, CDCl<sub>3</sub>): δ 7.70 (d,  $J$  = 7.2 Hz, 2H), 7.44 (d,  $J$  = 7.6 Hz, 2H), 7.38-7.32 (m, 5H), 7.25-7.19 (m, 2H), 7.00 (s, 1H), 6.79 (d,  $J$  = 7.6 Hz, 1H), 6.73 (d,  $J$  = 8.4 Hz, 1H), 6.51 (d,  $J$  = 8.0 Hz, 1H), 5.65 (s, 1H), 5.58 (s, 1H), 5.29 (d,  $J$  = 7.6 Hz, 1H), 3.76 (s, 3H), 3.72 (t,  $J$  = 10.0 Hz, 1H), 3.34 (t,  $J$  = 10.4 Hz, 2H), 3.29 (s, 3H), 2.36 (d,  $J$  = 11.6 Hz, 1H) ppm. **<sup>13</sup>C NMR** (100 MHz, CDCl<sub>3</sub>): δ 190.6, 174.9, 157.2, 142.9, 142.2, 139.0, 135.7, 130.6, 129.9, 129.7, 128.3, 128.1, 127.7, 126.7, 126.5, 125.8, 124.8, 124.1, 114.3, 112.1, 100.2, 69.1, 68.5, 58.9, 54.7, 48.3, 40.9, 35.6 ppm. **HRMS** (ESI)  $m/z$ : [M+H]<sup>+</sup> calcd. for C<sub>32</sub>H<sub>29</sub>N<sub>4</sub>O<sub>3</sub>: 517.2234; found: 517.2227.

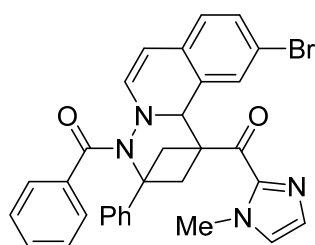**3qp**

C<sub>31</sub>H<sub>25</sub>BrN<sub>4</sub>O<sub>2</sub>  
M = 565.47 g/mol

(4-benzoyl-10-bromo-3-phenyl-3,4-dihydro-2H-1,3-methanopyridazino[6,1-a]isoquinolin-1(11bH)-yl)(1-methyl-1H-imidazol-2-yl)methanone (**3qp**): Prepared from (1-methyl-1H-imidazol-2-yl)(3-phenylbicyclo[1.1.0]butan-1-yl)methanone (**1q**, 47.7 mg, 0.20 mmol) and benzoyl(7-bromoisoquinolin-2-ium-2-yl)amide (**2p**, 78.5 mg, 0.24 mmol) according to the **GP3** at rt for 12 h. Purification by flash chromatography on silica gel using petroleum ether/EtOAc (3/1) afforded **3qp** as a white solid (106.3 mg, 94% yield).

**3qp**:  $R_f = 0.4$  (petroleum ether/EtOAc = 3/1). Mp: 240-242 °C.  $^1\text{H NMR}$  (400 MHz,  $\text{CDCl}_3$ ):  $\delta$  7.67 (d,  $J = 7.2$  Hz, 2H), 7.43 (d,  $J = 7.6$  Hz, 2H), 7.39-7.32 (m, 5H), 7.24-7.21 (m, 2H), 7.04-7.02 (m, 2H), 6.88 (d,  $J = 7.6$  Hz, 1H), 6.61 (d,  $J = 8.4$  Hz, 1H), 5.83 (s, 1H), 5.57 (s, 1H), 5.24 (d,  $J = 7.6$  Hz, 1H), 3.79 (s, 3H), 3.65 (t,  $J = 10.0$  Hz, 1H), 3.40 (d,  $J = 10.4$  Hz, 1H), 3.32 (t,  $J = 10.0$  Hz, 1H), 2.43 (d,  $J = 11.6$  Hz, 1H) ppm.  $^{13}\text{C NMR}$  (100 MHz,  $\text{CDCl}_3$ ):  $\delta$  190.5, 174.9, 142.7, 142.0, 141.4, 135.5, 131.2, 130.7, 130.3, 130.2, 130.0, 129.6, 128.2, 127.8, 127.1, 126.8, 125.9, 124.8, 117.8, 99.6, 68.7, 68.5, 58.9, 48.3, 41.1, 35.8 ppm. **HRMS** (ESI)  $m/z$ :  $[\text{M}+\text{H}]^+$  calcd. for  $\text{C}_{31}\text{H}_{26}\text{BrN}_4\text{O}_2$ : 565.1234; found: 565.1228.

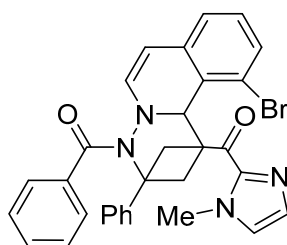

**3qp**  
 $\text{C}_{31}\text{H}_{25}\text{BrN}_4\text{O}_2$   
 $M = 565.47$  g/mol

(4-benzoyl-11-bromo-3-phenyl-3,4-dihydro-2H-1,3-methanopyridazino[6,1-a]isoquinolin-1(11bH)-yl)(1-methyl-1H-imidazol-2-yl)methanone (**3qq**): Prepared from (1-methyl-1H-imidazol-2-yl)(3-phenylbicyclo[1.1.0]butan-1-yl)methanone (**1q**, 47.7 mg, 0.20 mmol) and benzoyl(8-bromoisoquinolin-2-ium-2-yl)amide (**2q**, 78.5 mg, 0.24 mmol) according to the **GP3** at rt for 12 h. Purification by flash chromatography on silica gel using petroleum ether/EtOAc (3/1) afforded **3qq** as a white solid (96.1 mg, 85% yield).

**3qq**:  $R_f = 0.35$  (petroleum ether/EtOAc = 3/1). Mp: 275-277 °C.  $^1\text{H NMR}$  (400 MHz,  $\text{CDCl}_3$ ):  $\delta$  7.66 (d,  $J = 7.4$  Hz, 2H), 7.47 (d,  $J = 7.2$  Hz, 2H), 7.41-7.34 (m, 5H), 7.22 (t,  $J = 7.2$  Hz, 1H), 7.00 (d,  $J = 7.6$  Hz, 1H), 6.83 (d,  $J = 7.6$  Hz, 1H), 6.79 (s, 1H), 6.72 (s, 1H), 6.70-6.65 (m, 2H), 5.51 (s, 1H), 5.40 (d,  $J = 8.0$  Hz, 1H), 4.14 (t,  $J = 10.0$  Hz, 1H), 3.79 (s, 3H), 3.61 (d,  $J = 10.8$  Hz, 1H), 2.99 (t,  $J = 10.0$  Hz, 1H), 2.49 (d,  $J = 11.6$  Hz, 1H) ppm.  $^{13}\text{C NMR}$  (100 MHz,  $\text{CDCl}_3$ ):  $\delta$  190.2, 174.9, 142.7, 140.0, 141.8, 135.5, 135.3, 130.7, 129.4, 129.22, 129.18, 128.3, 128.2, 128.1, 127.9, 126.8, 125.7, 125.0,

123.4, 122.4, 101.1, 69.2, 68.4, 57.9, 46.1, 45.2, 35.9 ppm. **HRMS** (ESI)  $m/z$ :  $[M+Na]^+$  calcd. for  $C_{31}H_{25}BrN_4O_2Na$ : 587.1053; found: 587.1052.

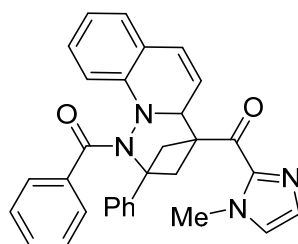**4qb**

$C_{31}H_{26}N_4O_2$   
M = 486.58 g/mol

**(1-benzoyl-2-phenyl-2,3-dihydro-1H-2,4-methanopyridazino[1,6-a]quinolin-4(4aH)-yl)(1-methyl-1H-imidazol-2-yl)methanone (4qb)**: Prepared from (1-methyl-1H-imidazol-2-yl)(3-phenylbicyclo[1.1.0]butan-1-yl)methanone (**1q**, 47.7 mg, 0.20 mmol) and benzoyl(quinolin-1-ium-1-yl)amide (**2d**, 59.6 mg, 0.24 mmol) according to the **GP3** at rt for 12 h. Purification by flash chromatography on silica gel using petroleum ether/EtOAc (3/1) afforded **4qd** as a white solid (84.8 mg, 87% yield).

**4qd**:  $R_f$  = 0.3 (petroleum ether/EtOAc = 3/1). Mp: 284-286 °C.  **$^1H$  NMR** (400 MHz,  $CDCl_3$ ):  $\delta$  7.78 (d,  $J$  = 7.2 Hz, 2H), 7.45 (d,  $J$  = 7.6 Hz, 2H), 7.39-7.34 (m, 4H), 7.28-7.21 (m, 4H), 7.16 (s, 1H), 7.02 (s, 1H), 6.86 (d,  $J$  = 6.8 Hz, 1H), 6.77 (t,  $J$  = 6.8 Hz, 1H), 6.20 (d,  $J$  = 10.0 Hz, 1H), 5.74 (d,  $J$  = 3.6 Hz, 1H), 5.07 (dd,  $J$  = 10.0, 4.4 Hz, 1H), 3.97 (s, 3H), 3.21 (t,  $J$  = 9.6 Hz, 1H), 3.12 (d,  $J$  = 10.0 Hz, 1H), 2.89 (d,  $J$  = 10.8 Hz, 1H), 2.36 (d,  $J$  = 11.2 Hz, 1H) ppm.  **$^{13}C$  NMR** (100 MHz,  $CDCl_3$ ):  $\delta$  190.1, 175.7, 146.5, 142.4, 141.6, 135.2, 130.7, 129.98, 129.95, 128.0, 127.8, 127.7, 127.6, 127.0, 126.9, 126.8, 126.0, 121.1, 120.1, 119.8, 111.8, 68.4, 66.2, 60.0, 48.5, 38.4, 35.9 ppm. **HRMS** (ESI)  $m/z$ :  $[M+Na]^+$  calcd. for  $C_{31}H_{26}N_4O_2Na$ : 509.1936; found: 509.1948.

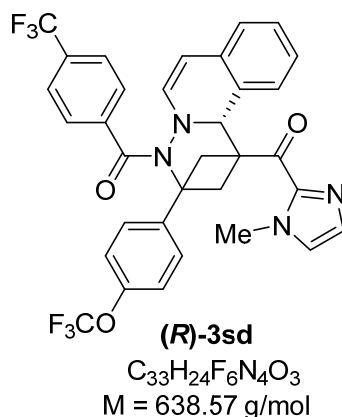

**(R)**-(1-methyl-1*H*-imidazol-2-yl)(3-(4-(trifluoromethoxy)phenyl)-4-(4-(trifluoromethyl)benzoyl)-3,4-dihydro-2*H*-1,3-methanopyridazino[6,1-*a*]isoquinolin-1(11*bH*)-yl)methanone ((**R**)-**3sd**) :

Prepared from (1-methyl-1*H*-imidazol-2-yl)(3-(4-(trifluoromethoxy)phenyl)bicyclo[1.1.0]butan-1-yl)methanone (**1s**, 64.5 mg, 0.20 mmol) and isoquinolin-2-ium-2-yl(4-(trifluoromethyl)benzoyl)amide (**2d**, 75.9 mg, 0.24 mmol) at room temperature for 16 h according to the **GP4**. Purification by flash chromatography on silica gel using petroleum ether/EtOAc (3/1) afforded (**R**)-**3sd** as a yellow solid (106.2 mg, 83% yield).

**(R)-3sd**:  $R_f = 0.3$  (petroleum ether/EtOAc = 3/1). Mp: 120-122 °C. HPLC analysis (Chiralpak AD-H,  $i$ PrOH/hexane = 15/85, 1.0 mL/min, 254 nm;  $t_r$  (major) = 16.36 min,  $t_r$  (minor) = 33.75 min) gave the isomeric composition of the product: 95% ee.  $[\alpha]_D^{20} = -106.4$  ( $c = 2.60$ ,  $CHCl_3$ ).  **$^1H$  NMR** (400 MHz,  $CDCl_3$ ):  $^1H$  NMR (400 MHz,  $CDCl_3$ ):  $\delta$  7.69 (d,  $J = 8.0$  Hz, 2H), 7.52 (d,  $J = 8.0$  Hz, 2H), 7.36 (d,  $J = 8.4$  Hz, 2H), 7.11-7.10 (m, 3H), 6.91 (s, 1H), 6.87 (t,  $J = 7.2$  Hz, 1H), 6.72-6.70 (m, 2H), 6.51 (t,  $J = 7.6$  Hz, 1H), 5.80 (d,  $J = 7.6$  Hz, 1H), 5.55 (s, 1H), 5.26 (d,  $J = 8.0$  Hz, 1H), 3.68-3.65 (m, 1H), 3.64 (s, 3H), 3.27-3.19 (m, 2H), 2.32 (d,  $J = 11.6$  Hz, 1H) ppm.  **$^{13}C$  NMR** (100 MHz,  $CDCl_3$ ): 190.3, 173.9, 148.0 (q,  $J = 1.9$  Hz), 142.6, 140.5, 140.2, 138.9, 132.2 (q,  $J = 32.4$  Hz), 130.9, 129.9, 128.7, 128.4, 128.1, 126.7, 126.52, 126.49, 125.2, 124.94 (q,  $J = 3.7$  Hz), 124.89, 123.7 (q,  $J = 270.7$  Hz), 120.7, 120.4 (q,  $J = 255.4$  Hz), 101.6, 69.0, 68.2, 58.7, 48.4, 41.0, 35.6 ppm.  **$^{19}F$  NMR** (376 MHz,  $CDCl_3$ ):  $\delta$  -57.74, -62.89 ppm. **HRMS** (ESI)  $m/z$ :  $[M+H]^+$  calcd. for  $C_{33}H_{25}F_6N_4O_3$ : 639.1825; found: 639.1826.

## &lt;Chromatogram&gt;

mV

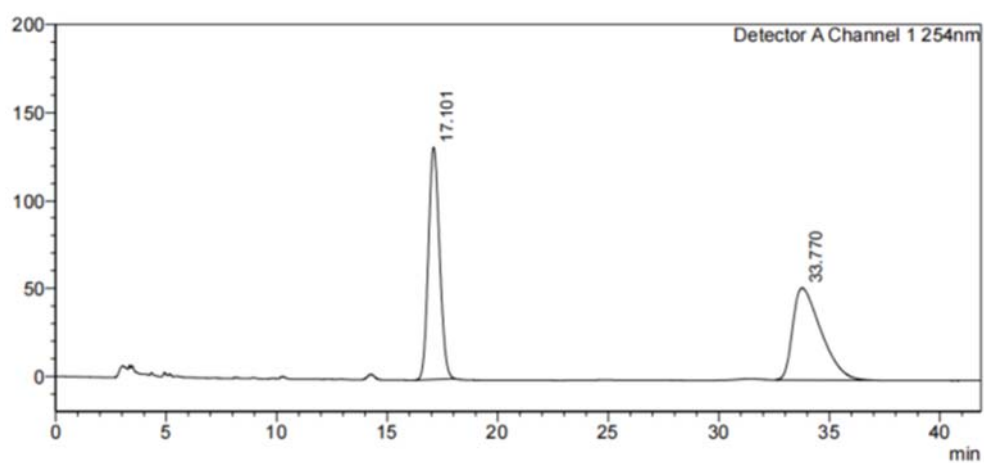

| Peak# | Ret. Time | Peak Start | Area    | Height | Area%   |
|-------|-----------|------------|---------|--------|---------|
| 1     | 17.101    | 16.192     | 4636076 | 132377 | 49.961  |
| 2     | 33.770    | 32.567     | 4643232 | 52223  | 50.039  |
| Total |           |            | 9279309 | 184600 | 100.000 |

## &lt;Chromatogram&gt;

mV

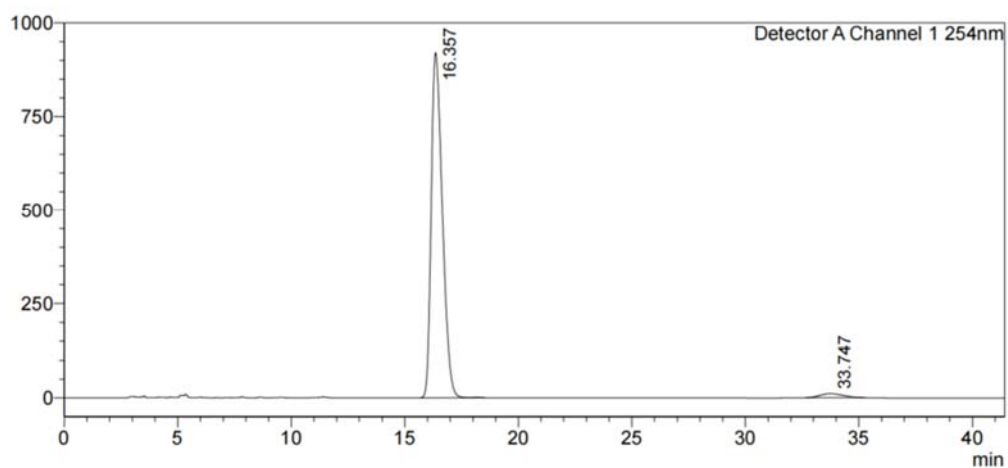

| Peak# | Ret. Time | Peak Start | Area     | Height | Area%   |
|-------|-----------|------------|----------|--------|---------|
| 1     | 16.357    | 15.700     | 31341073 | 920489 | 97.572  |
| 2     | 33.747    | 32.700     | 779934   | 10577  | 2.428   |
| Total |           |            | 32121007 | 931066 | 100.000 |



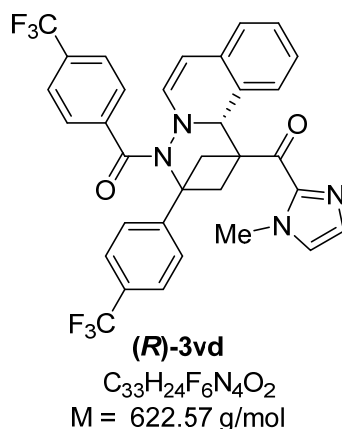

**(R)**-(1-methyl-1*H*-imidazol-2-yl)(4-(4-(trifluoromethyl)benzoyl)-3-(4-(trifluoromethyl)phenyl)-3,4-dihydro-2*H*-1,3-methanopyridazino[6,1-*a*]isoquinolin-1(11*bH*)-yl)methanone ((**R**)-**3vd**) :

Prepared from (1-methyl-1*H*-imidazol-2-yl)(3-(4-(trifluoromethyl)phenyl)bicyclo[1.1.0]butan-1-yl)methanone (**1v**, 61.3 mg, 0.2 mmol) and isoquinolin-2-ium-2-yl(4-(trifluoromethyl)benzoyl)amide (**2d**, 75.9 mg, 0.24 mmol) at room temperature for 16 h according to the **GP4**. Purification by flash chromatography on silica gel using petroleum ether/EtOAc (3/1) afforded (**R**)-**3vd** as a yellow solid (104.6 mg, 84% yield)

**(R)-3vd**:  $R_f = 0.25$  (petroleum ether/EtOAc = 3/1). Mp: 131-133 °C. HPLC analysis (Chiralpak AD-H,  $i$ PrOH/hexane = 15/85, 1.0 mL/min, 254 nm;  $t_r$  (major) = 16.96 min,  $t_r$  (minor) = 52.68 min) gave the isomeric composition of the product: 96% ee.  $[\alpha]_D^{20} = -113.9$  ( $c = 1.18$ ,  $CHCl_3$ ).  **$^1H$  NMR** (400 MHz,  $CDCl_3$ ):  $\delta$  7.79 (d,  $J = 8.0$  Hz, 2H), 7.62 (d,  $J = 8.4$  Hz, 4H), 7.54 (d,  $J = 8.0$  Hz, 2H), 7.21 (s, 1H), 7.02 (s, 1H), 6.97 (t,  $J = 7.6$  Hz, 1H), 6.83-6.80 (m, 2H), 6.61 (t,  $J = 7.6$  Hz, 1H), 5.90 (d,  $J = 8.0$  Hz, 1H), 5.65 (s, 1H), 5.37 (d,  $J = 7.6$  Hz, 1H), 3.79-3.74 (m, 1H), 3.75 (s, 3H), 3.38 (d,  $J = 10.8$  Hz, 1H), 3.30 (t,  $J = 9.2$  Hz, 1H), 2.41 (d,  $J = 11.6$  Hz, 1H) ppm.  **$^{13}C$  NMR** (100 MHz,  $CDCl_3$ ):  $\delta$  190.2, 173.8, 145.6, 142.6, 140.2, 138.7, 132.3 (q,  $J = 32.4$  Hz), 130.9, 129.9, 129.1 (q,  $J = 32.2$  Hz), 128.7, 128.4, 128.1, 126.8, 126.5, 125.4 (q,  $J = 3.8$  Hz), 125.3, 125.01, 125.0, 124.1 (q,  $J = 270.3$  Hz), 123.7 (q,  $J = 270.8$  Hz), 101.7, 69.1, 68.4, 58.7, 48.3, 41.0, 35.7 ppm.  **$^{19}F$  NMR** (376 MHz,  $CDCl_3$ ):  $\delta$  -62.40, -62.92 ppm. **HRMS** (ESI)  $m/z$ :  $[M+Na]^+$  calcd. for  $C_{33}H_{24}F_6N_4O_2Na$ : 645.1696; found: 645.1694.

## &lt;Chromatogram&gt;

mV

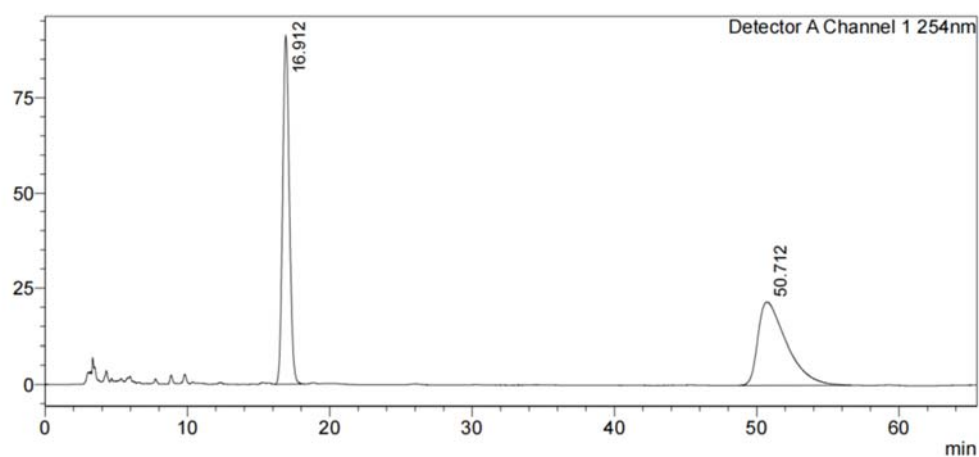

| Peak# | Ret. Time | Peak Start | Area    | Height | Area%   |
|-------|-----------|------------|---------|--------|---------|
| 1     | 16.912    | 16.117     | 2976250 | 91016  | 49.495  |
| 2     | 50.712    | 48.725     | 3037038 | 21640  | 50.505  |
| Total |           |            | 6013288 | 112656 | 100.000 |

## &lt;Chromatogram&gt;

mV

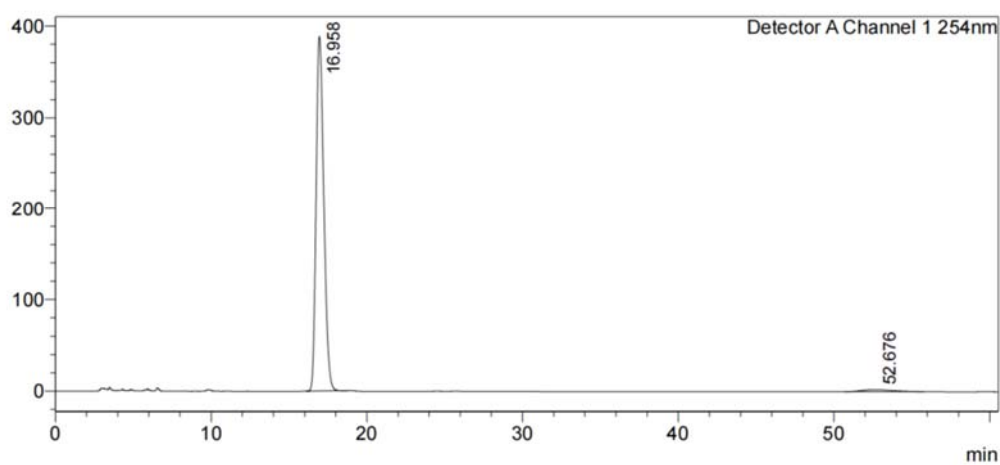

| Peak# | Ret. Time | Peak Start | Area     | Height | Area%   |
|-------|-----------|------------|----------|--------|---------|
| 1     | 16.958    | 16.108     | 13319650 | 388606 | 97.847  |
| 2     | 52.676    | 50.700     | 293067   | 2115   | 2.153   |
| Total |           |            | 13612717 | 390721 | 100.000 |

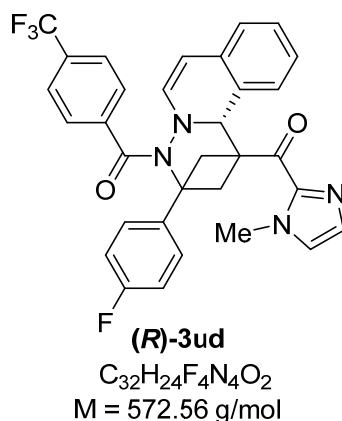

**(R)-3-(4-fluorophenyl)-1-(1-methyl-1H-imidazole-2-carbonyl)-1,2,3,11b-tetrahydro-4H-1,3-methanopyridazino[6,1-a]isoquinolin-4-yl(4-(trifluoromethyl)phenyl)methanone ((R)-3ud)** : Prepared from (3-(4-fluorophenyl)bicyclo[1.1.0]butan-1-yl)(1-methyl-1H-imidazol-2-yl)methanone (**1u**, 51.3 mg, 0.20 mmol) and isoquinolin-2-ium-2-yl(4-(trifluoromethyl)benzoyl)amide (**2d**, 75.9 mg, 0.24 mmol) at room temperature for 16 h according to the **GP4**. Purification by flash chromatography on silica gel using petroleum ether/EtOAc (3/1) afforded (**R**)-**3ud** as a yellow solid (95.0 mg, 83% yield).

**(R)-3ud**:  $R_f$  = 0.3 (petroleum ether/EtOAc = 3/1). Mp: 145-147 °C. HPLC analysis (Chiralpak AD-H,  $i$ PrOH/hexane = 15/85, 1.0 mL/min, 254 nm; tr (major) = 25.11 min, tr (minor) = 38.97 min) gave the isomeric composition of the product: 94% ee.  $[\alpha]_D^{20}$  = -116.4 ( $c$  = 2.40,  $CHCl_3$ ).  **$^1H$  NMR** (400 MHz,  $CDCl_3$ ):  $\delta$  7.77 (d,  $J$  = 7.6 Hz, 2H), 7.61 (d,  $J$  = 8.0 Hz, 2H), 7.42-7.38 (m, 2H), 7.20 (s, 1H), 7.03 (t,  $J$  = 8.8 Hz, 3H), 6.96 (t,  $J$  = 7.6 Hz, 1H), 6.79 (d,  $J$  = 7.2 Hz, 2H), 6.59 (t,  $J$  = 7.6 Hz, 1H), 5.89 (d,  $J$  = 7.6 Hz, 1H), 5.63 (s, 1H), 5.34 (d,  $J$  = 7.6 Hz, 1H), 3.76-3.72 (m, 1H), 3.74 (s, 3H), 3.34-3.27 (m, 2H), 2.39 (d,  $J$  = 11.2 Hz, 1H) ppm.  **$^{13}C$  NMR** (100 MHz,  $CDCl_3$ ):  $\delta$  190.4, 173.9, 161.7 (d,  $J$  = 244.0 Hz), 142.6, 140.3, 139.1, 137.7 (d,  $J$  = 3.1 Hz), 132.1 (q,  $J$  = 32.3 Hz), 130.9, 129.9, 128.7, 128.3, 128.1, 126.8, 126.7 (d,  $J$  = 5.8 Hz), 126.5, 125.2, 124.93 (q,  $J$  = 3.8 Hz), 124.87, 123.7 (q,  $J$  = 270.7 Hz), 115.1 (d,  $J$  = 21.4 Hz), 101.4, 69.0, 68.3, 58.7, 48.5, 41.1, 35.7 ppm.  **$^{19}F$  NMR** (376 MHz,  $CDCl_3$ ):  $\delta$  -62.88, -115.53 ppm. **HRMS** (ESI)  $m/z$ :  $[M+H]^+$  calcd. for  $C_{32}H_{25}F_4N_4O_2$ : 573.1988; found: 573.1898.

## &lt;Chromatogram&gt;

mV

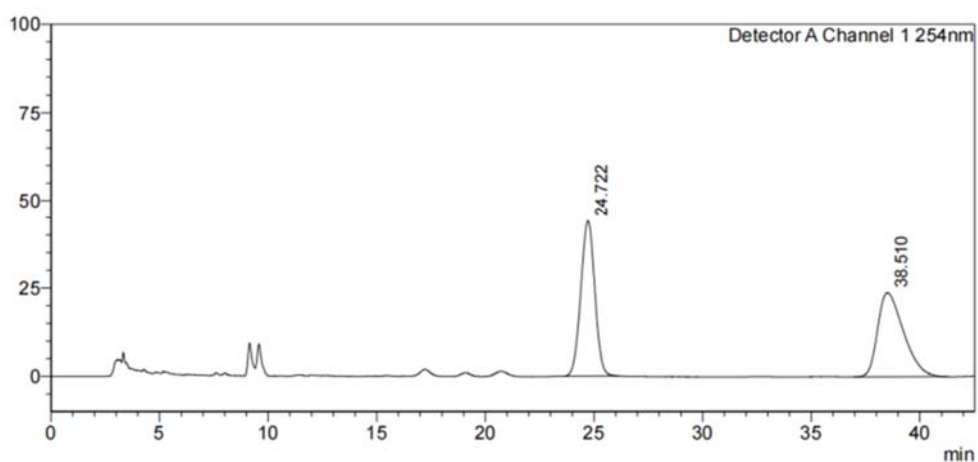

| Peak# | Ret. Time | Peak Start | Area    | Height | Area%   |
|-------|-----------|------------|---------|--------|---------|
| 1     | 24.722    | 23.625     | 1972876 | 44007  | 50.031  |
| 2     | 38.510    | 36.975     | 1970403 | 23786  | 49.969  |
| Total |           |            | 3943279 | 67794  | 100.000 |

## &lt;Chromatogram&gt;

mV

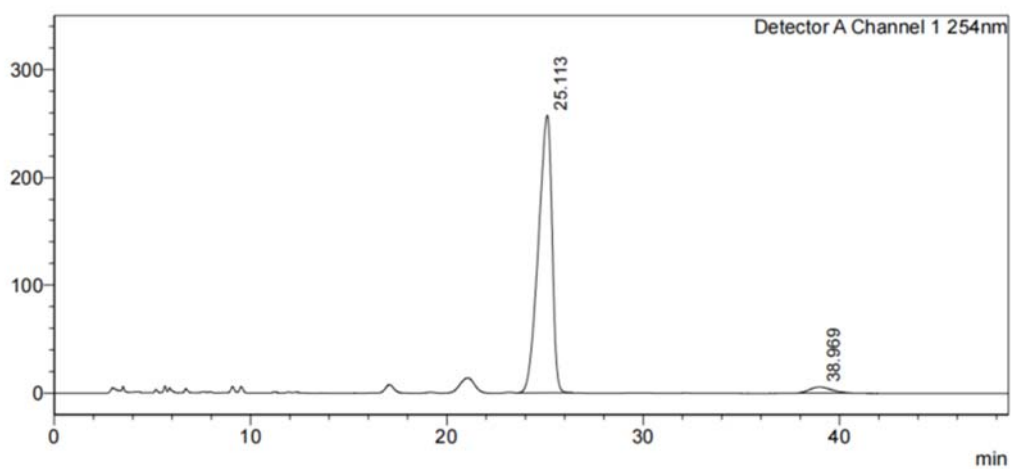

| Peak# | Ret. Time | Peak Start | Area     | Height | Area%   |
|-------|-----------|------------|----------|--------|---------|
| 1     | 25.113    | 23.500     | 12422553 | 257578 | 96.805  |
| 2     | 38.969    | 37.917     | 409976   | 5465   | 3.195   |
| Total |           |            | 12832528 | 263043 | 100.000 |

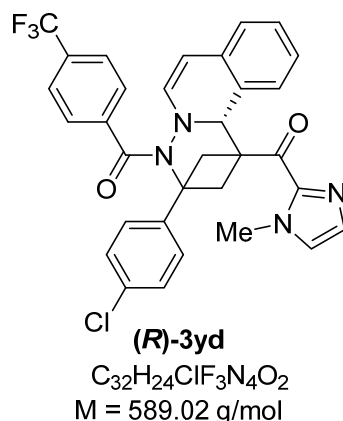

**(R)-3-(4-chlorophenyl)-1-(1-methyl-1H-imidazole-2-carbonyl)-1,2,3,11b-tetrahydro-4H-1,3-methanopyridazino[6,1-a]isoquinolin-4-yl(4-(trifluoromethyl)phenyl)methanone ((R)-3yd)** : Prepared from (3-(4-chlorophenyl)bicyclo[1.1.0]butan-1-yl)(1-methyl-1H-imidazol-2-yl)methanone (**1y**, 54.5 mg, 0.20 mmol) and isoquinolin-2-ium-2-yl(4-(trifluoromethyl)benzoyl)amide (**2d**, 75.9 mg, 0.24 mmol) at room temperature in **CH<sub>2</sub>Cl<sub>2</sub>/MeCN (10/1)** for 16 h according to the **GP4**. Purification by flash chromatography on silica gel using petroleum ether/EtOAc (3/1) afforded **(R)-3yd** as a white solid (94.2 mg, 80% yield).

**(R)-3yd**:  $R_f = 0.25$  (petroleum ether/EtOAc = 3/1). Mp: 150-152 °C. HPLC analysis (Chiralpak AD-H, *i*PrOH/hexane = 15/85, 1.0 mL/min, 254 nm; *t*<sub>r</sub> (major) = 18.39 min, *t*<sub>r</sub> (minor) = 37.06 min) gave the isomeric composition of the product: 95% ee.  $[\alpha]_D^{20} = -164.4$  (*c* = 1.15, CHCl<sub>3</sub>). **<sup>1</sup>H NMR** (400 MHz, CDCl<sub>3</sub>): δ 7.77 (d, *J* = 8.0 Hz, 2H), 7.61 (d, *J* = 8.4 Hz, 2H), 7.36 (d, *J* = 8.4 Hz, 2H), 7.32 (d, *J* = 8.8 Hz, 2H), 7.20 (s, 1H), 7.01 (s, 1H), 6.96 (t, *J* = 7.6 Hz, 1H), 6.79 (d, *J* = 8.0 Hz, 2H), 6.60 (t, *J* = 7.6 Hz, 1H), 5.89 (d, *J* = 7.6 Hz, 1H), 5.63 (s, 1H), 5.34 (d, *J* = 8.0 Hz, 1H), 3.78-3.71 (m, 1H), 3.75 (s, 3H), 3.33-3.25 (m, *J* = 8.0 Hz, 2H), 2.39 (d, *J* = 11.2 Hz, 1H) ppm. **<sup>13</sup>C NMR** (100 MHz, CDCl<sub>3</sub>): δ 190.4, 173.8, 142.6, 140.4, 140.3, 139.0, 132.8, 132.2 (q, *J* = 32.4 Hz), 130.9, 129.9, 128.7, 128.4, 128.4, 128.1, 126.7, 126.5, 125.2, 125.0 (q, *J* = 3.7 Hz), 124.9, 123.7 (q, *J* = 270.9 Hz), 101.5, 69.0, 68.3, 58.7, 48.3, 41.0, 35.7 ppm. **<sup>19</sup>F NMR** (376 MHz, CDCl<sub>3</sub>): δ -62.89 ppm. **HRMS** (ESI) *m/z*: [M+Na]<sup>+</sup> calcd. for C<sub>32</sub>H<sub>24</sub>ClF<sub>3</sub>N<sub>4</sub>O<sub>2</sub>Na: 611.1432; found: 611.1427.

Note: In  $\text{CH}_2\text{Cl}_2$  under standard conditions, (R)-**3xb** was obtained with a 90% yield and 89% ee.

**<Chromatogram>**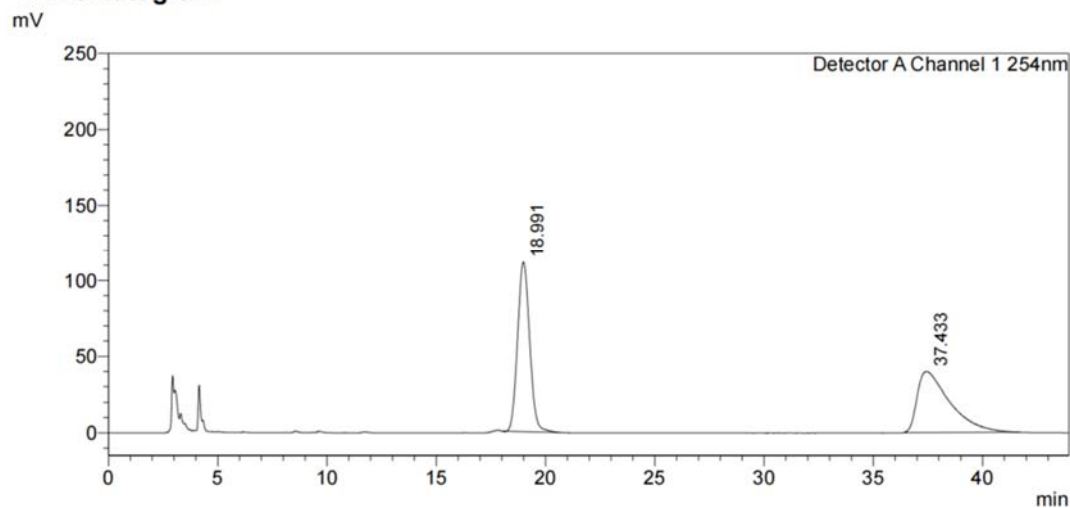

| Peak# | Ret. Time | Peak Start | Area    | Height | Area%   |
|-------|-----------|------------|---------|--------|---------|
| 1     | 18.991    | 18.000     | 4269930 | 111403 | 50.619  |
| 2     | 37.433    | 36.342     | 4165548 | 39854  | 49.381  |
| Total |           |            | 8435478 | 151257 | 100.000 |

**<Chromatogram>**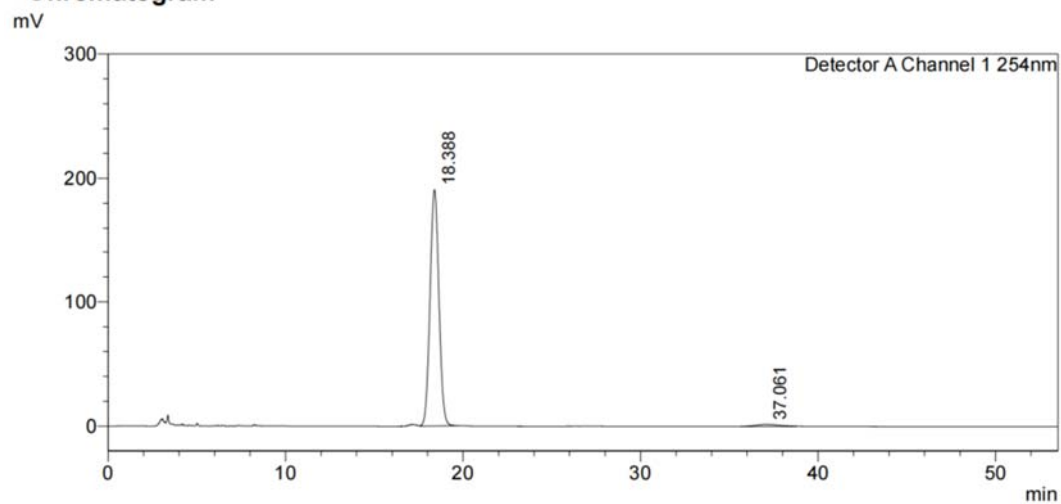

| Peak# | Ret. Time | Peak Start | Area    | Height | Area%   |
|-------|-----------|------------|---------|--------|---------|
| 1     | 18.388    | 17.550     | 6613248 | 190806 | 97.480  |
| 2     | 37.061    | 35.625     | 170971  | 1723   | 2.520   |
| Total |           |            | 6784219 | 192530 | 100.000 |

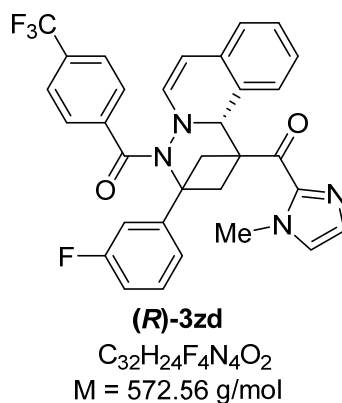

**(R)-3-(3-fluorophenyl)-1-(1-methyl-1H-imidazole-2-carbonyl)-1,2,3,11b-tetrahydro-4H-1,3-methanopyridazino[6,1-a]isoquinolin-4-yl(4-(trifluoromethyl)phenyl)methanone ((R)-3zd)** : Prepared from (3-(3-fluorophenyl)bicyclo[1.1.0]butan-1-yl)(1-methyl-1H-imidazol-2-yl)methanone (**1z**, 51.3 mg, 0.20 mmol) and isoquinolin-2-ium-2-yl(4-(trifluoromethyl)benzoyl)amide (**2d**, 75.9 mg, 0.24 mmol) at room temperature for 16 h according to the **GP4**. Purification by flash chromatography on silica gel using petroleum ether/EtOAc (3/1) afforded (**R**)-**3zd** as a yellow solid (89.3 mg, 78% yield).

**(R)-3zd**:  $R_f = 0.3$  (petroleum ether/EtOAc = 3/1). Mp: 129-131 °C. HPLC analysis (Chiralpak AD-H,  $i$ PrOH/hexane = 15/85, 1.0 mL/min, 254 nm;  $t_r$  (major) = 19.18 min,  $t_r$  (minor) = 26.43 min) gave the isomeric composition of the product: 94% ee.  $[\alpha]_D^{20} = -113.5$  ( $c = 2.13$ ,  $CHCl_3$ ).  **$^1H$  NMR** (400 MHz,  $CDCl_3$ ):  $\delta$  7.79 (d,  $J = 8.0$  Hz, 2H), 7.61 (d,  $J = 8.0$  Hz, 2H), 7.31 (q,  $J = 7.6$  Hz, 1H), 7.21 (d,  $J = 6.8$  Hz, 2H), 7.12 (d,  $J = 9.6$  Hz, 1H), 7.00 (s, 1H), 6.98-6.91 (m, 2H), 6.80 (t,  $J = 7.2$  Hz, 2H), 6.60 (t,  $J = 7.6$  Hz, 1H), 5.89 (d,  $J = 6.0$  Hz, 1H), 5.64 (s, 1H), 5.35 (d,  $J = 7.2$  Hz, 1H), 3.74-3.70 (m, 1H), 3.74 (s, 3H), 3.34 (d,  $J = 10.8$  Hz, 1H), 3.27 (t,  $J = 9.2$  Hz, 1H), 2.41 (d,  $J = 11.6$  Hz, 1H) ppm.  **$^{13}C$  NMR** (100 MHz,  $CDCl_3$ ):  $\delta$  190.3, 173.7, 162.8 (d,  $J = 244.1$  Hz), 144.4 (d,  $J = 7.2$  Hz), 142.6, 140.2, 138.9, 132.2 (q,  $J = 32.4$  Hz), 130.9, 129.9, 129.8, 128.7, 128.4, 128.1, 126.7, 126.5, 125.2, 124.93 (q,  $J = 3.8$  Hz), 124.87, 123.7 (q,  $J = 270.8$  Hz), 120.4 (d,  $J = 2.8$  Hz), 113.9 (d,  $J = 21.0$  Hz), 112.0 (d,  $J = 22.1$  Hz), 101.5, 69.0, 68.3, 58.6, 48.3, 41.2, 35.6 ppm.  **$^{19}F$  NMR** (376 MHz,  $CDCl_3$ ):  $\delta$  -62.85, -113.10 ppm. **HRMS** (ESI)  $m/z$ :  $[M+Na]^+$  calcd. for  $C_{32}H_{24}F_4N_4O_2Na$ : 595.1728; found: 595.1731.

## &lt;Chromatogram&gt;

mV

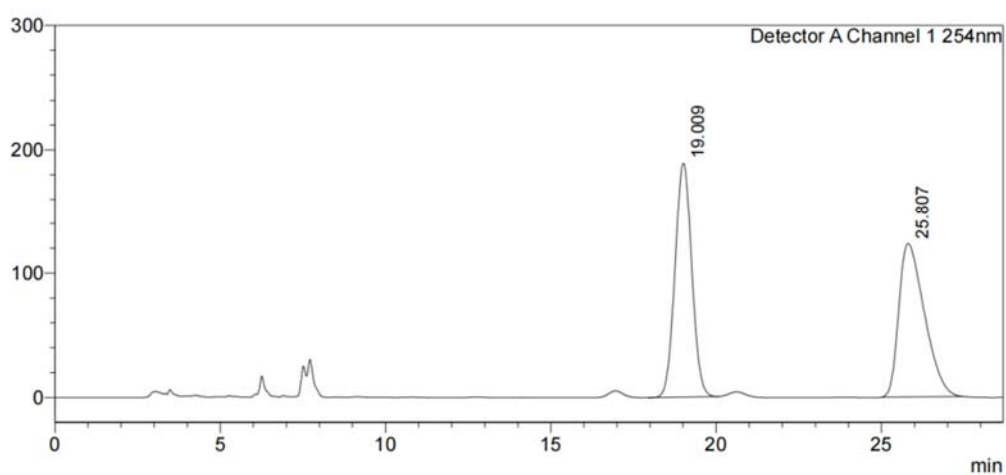

| Peak# | Ret. Time | Peak Start | Area     | Height | Area%   |
|-------|-----------|------------|----------|--------|---------|
| 1     | 19.009    | 17.950     | 6668948  | 188873 | 50.070  |
| 2     | 25.807    | 25.008     | 6650205  | 123333 | 49.930  |
| Total |           |            | 13319153 | 312206 | 100.000 |

## &lt;Chromatogram&gt;

mV

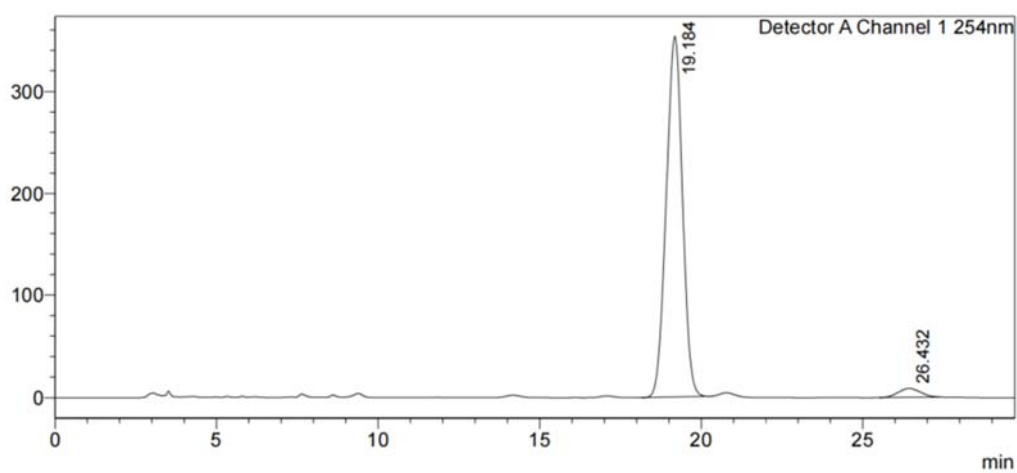

| Peak# | Ret. Time | Peak Start | Area     | Height | Area%   |
|-------|-----------|------------|----------|--------|---------|
| 1     | 19.184    | 18.158     | 12349719 | 352960 | 96.753  |
| 2     | 26.432    | 25.517     | 414452   | 8597   | 3.247   |
| Total |           |            | 12764171 | 361557 | 100.000 |



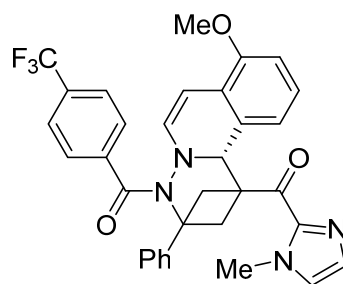**(R)-3qr**

$C_{33}H_{27}F_3N_4O_3$   
 M = 584.60 g/mol

**(R)**-(8-methoxy-1-(1-methyl-1*H*-imidazole-2-carbonyl)-3-phenyl-1,2,3,11*b*-tetrahydro-4*H*-1,3-methanopyridazino[6,1-*a*]isoquinolin-4-yl)(4-(trifluoromethyl)phenyl)methanone (**(R)-3qr**) : Prepared from (1-methyl-1*H*-imidazol-2-yl)(3-phenylbicyclo[1.1.0]butan-1-yl)methanone (**1q**, 47.7 mg, 0.20 mmol) and (5-methoxyisoquinolin-2-ium-2-yl)(4-(trifluoromethyl)benzoyl)amide (**2r**, 83.1 mg, 0.24 mmol) at room temperature in **CH<sub>2</sub>Cl<sub>2</sub>/MeCN** (10/1) for 16 h according to the **GP4**. Purification by flash chromatography on silica gel using petroleum ether/EtOAc (3/1) afforded **(R)-3qr** as a yellow solid (102.8 mg, 88% yield).

**(R)-3qr**:  $R_f$  = 0.2 (petroleum ether/EtOAc = 3/1). Mp: 217-219 °C. HPLC analysis (Chiralpak IC, *i*PrOH/hexane = 10/90, 1.0 mL/min, 254 nm;  $t_r$  (major) = 26.73 min,  $t_r$  (minor) = 20.28 min) gave the isomeric composition of the product: 93% *ee*.  $[\alpha]_D^{20} = -148.7$  ( $c = 1.28$ , CHCl<sub>3</sub>). **<sup>1</sup>H NMR** (400 MHz, CDCl<sub>3</sub>):  $\delta$  7.78 (d,  $J = 7.6$  Hz, 2H), 7.59 (d,  $J = 7.6$  Hz, 2H), 7.44 (d,  $J = 7.6$  Hz, 2H), 7.35 (t,  $J = 7.2$  Hz, 2H), 7.21 (d,  $J = 13.6$  Hz, 2H), 6.99 (s, 1H), 6.82 (d,  $J = 8.0$  Hz, 1H), 6.57 (t,  $J = 8.0$  Hz, 1H), 6.50 (d,  $J = 9.4$  Hz, 1H), 5.72 (d,  $J = 8.0$  Hz, 1H), 5.63 (s, 1H), 5.49 (d,  $J = 7.6$  Hz, 1H), 3.77-3.75 (m, 1H), 3.73 (s, 3H), 3.71 (s, 3H), 3.37 (d,  $J = 10.4$  Hz, 1H), 3.30 (t,  $J = 9.2$  Hz, 1H), 2.39 (d,  $J = 11.6$  Hz, 1H) ppm. **<sup>13</sup>C NMR** (100 MHz, CDCl<sub>3</sub>):  $\delta$  190.3, 173.6, 153.3, 142.7, 141.8, 139.6, 139.2, 131.9 (q,  $J = 32.3$  Hz), 129.7, 129.2, 128.4, 128.2, 126.9, 126.6, 125.9, 124.85, 124.82 (q,  $J = 3.6$  Hz), 123.7 (q,  $J = 270.8$  Hz), 120.3, 118.8, 110.3, 95.3, 68.8, 68.7, 58.8, 55.2, 48.5, 41.2, 35.6 ppm. **<sup>19</sup>F NMR** (376 MHz, CDCl<sub>3</sub>):  $\delta$  -62.81 ppm. **HRMS** (ESI)  $m/z$ :  $[M+Na]^+$  calcd. for C<sub>33</sub>H<sub>27</sub>F<sub>3</sub>N<sub>4</sub>O<sub>3</sub>Na: 607.1927; found: 607.1932.

Note: In  $\text{CH}_2\text{Cl}_2$  under standard conditions, (*R*)-**3pq** was obtained with a 71% yield and 88% ee.

## &lt;Chromatogram&gt;

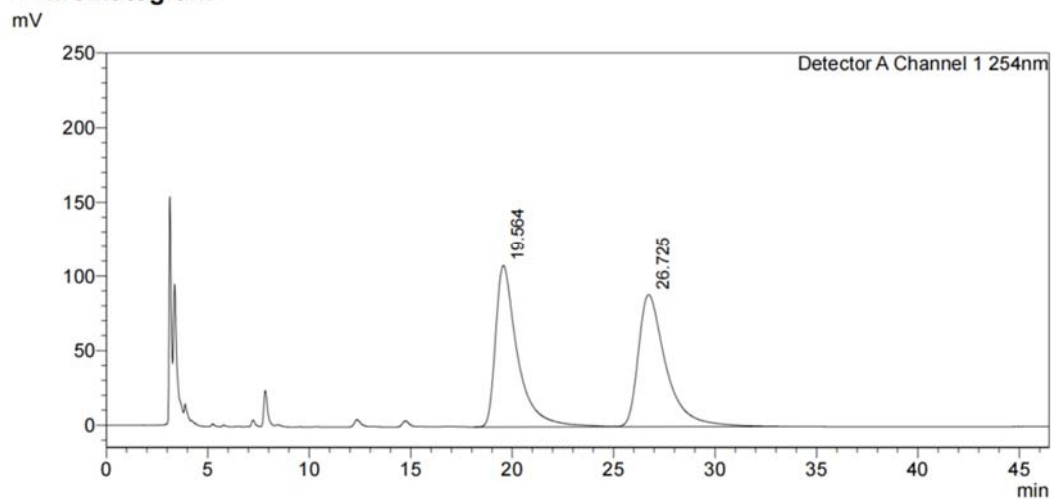

| Peak# | Ret. Time | Peak Start | Area     | Height | Area%   |
|-------|-----------|------------|----------|--------|---------|
| 1     | 19.564    | 18.108     | 8170842  | 108228 | 49.249  |
| 2     | 26.725    | 25.100     | 8419996  | 88514  | 50.751  |
| Total |           |            | 16590838 | 196742 | 100.000 |

## &lt;Chromatogram&gt;

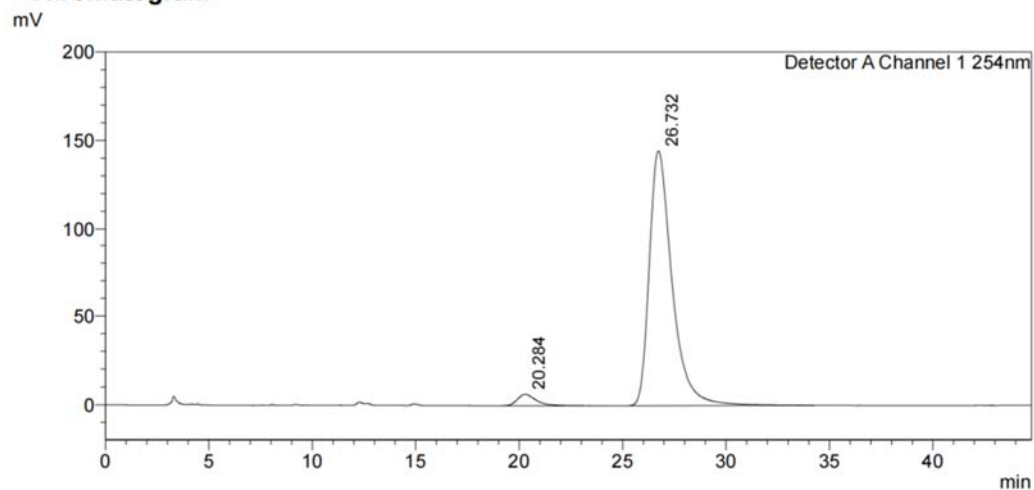

| Peak# | Ret. Time | Peak Start | Area     | Height | Area%   |
|-------|-----------|------------|----------|--------|---------|
| 1     | 20.284    | 19.158     | 417241   | 6504   | 3.632   |
| 2     | 26.732    | 25.200     | 11070052 | 144696 | 96.368  |
| Total |           |            | 11487293 | 151200 | 100.000 |

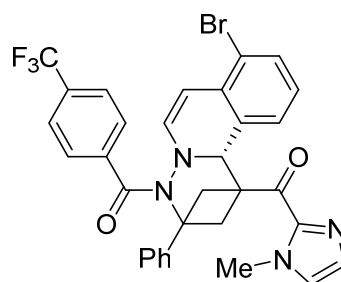**(R)-3qs**

$C_{32}H_{24}BrF_3N_4O_2$   
 $M = 633.47$  g/mol

**(R)- (8-bromo-1-(1-methyl-1*H*-imidazole-2-carbonyl)-3-phenyl-1,2,3,4-tetrahydro-4*H*-1,3-methanopyridazino[6,1-*a*]isoquinolin-4-yl)(4-(trifluoromethyl)phenyl)methanone ((R)-3qs):**

Prepared from (1-methyl-1*H*-imidazol-2-yl)(3-phenylbicyclo[1.1.0]butan-1-yl)methanone (**1q**, 47.7 mg, 0.20 mmol) and (5-bromoisoquinolin-2-ium-2-yl)(4-(trifluoromethyl)benzoyl)amide (**2s**, 94.8 mg, 0.24 mmol) at room temperature in **CH<sub>2</sub>Cl<sub>2</sub>/MeCN** (10/1) for 16 h according to the **GP4**. Purification by flash chromatography on silica gel using petroleum ether/EtOAc (3/1) afforded (*R*)-**3qs** as a white solid (96.0 mg, 76% yield).

(*R*)-**3qs**  $R_f = 0.35$  (petroleum ether/EtOAc = 3/1). Mp: 148-150 °C. HPLC analysis (Chiralpak AD-H, *i*PrOH/hexane = 15/85, 1.0 mL/min, 254 nm;  $t_r$  (major) = 18.96 min,  $t_r$  (minor) = 26.04 min) gave the isomeric composition of the product: 91% *ee*.  $[\alpha]_D^{20} = -83.0$  ( $c = 1.13$ , CHCl<sub>3</sub>). **<sup>1</sup>H NMR** (400 MHz, CDCl<sub>3</sub>):  $\delta$  7.77 (d,  $J = 8.0$  Hz, 2H), 7.62 (d,  $J = 8.0$  Hz, 2H), 7.42 (d,  $J = 7.2$  Hz, 2H), 7.36 (t,  $J = 7.2$  Hz, 2H), 7.25-7.17 (m, 3H), 7.01 (s, 1H), 6.91 (d,  $J = 8.0$  Hz, 1H), 6.42 (t,  $J = 8.0$  Hz, 1H), 5.89 (d,  $J = 7.6$  Hz, 1H), 5.71 (d,  $J = 8.0$  Hz, 1H), 5.61 (s, 1H), 3.76 (s, 3H), 3.72 (t,  $J = 9.2$  Hz, 1H), 3.36 (d,  $J = 10.4$  Hz, 1H), 3.27 (t,  $J = 9.2$  Hz, 1H), 2.45 (d,  $J = 11.6$  Hz, 1H) ppm. **<sup>13</sup>C NMR** (100 MHz, CDCl<sub>3</sub>):  $\delta$  190.3, 173.6, 142.6, 141.5, 139.0, 132.8, 132.2 (q,  $J = 32.3$  Hz), 130.9, 130.1, 129.9, 128.4, 128.3, 127.1, 126.7, 125.9, 125.8, 124.9, 125.0 (q,  $J = 3.7$  Hz), 123.7 (q,  $J = 271.0$  Hz), 120.3, 99.8, 69.1, 68.9, 58.8, 48.4, 41.6, 35.7 ppm. **<sup>19</sup>F NMR** (376 MHz, CDCl<sub>3</sub>):  $\delta$  -62.89 ppm. **HRMS** (ESI)  $m/z$ :  $[M+H]^+$  calcd. for  $C_{32}H_{25}BrF_3N_4O_2$ : 633.1107; found: 633.1100.

## &lt;Chromatogram&gt;

mV

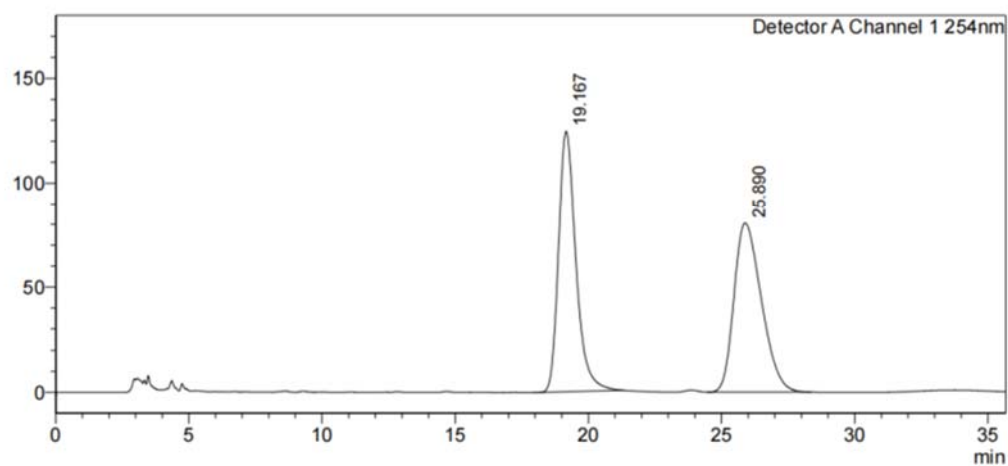

| Peak# | Ret. Time | Peak Start | Area     | Height | Area%   |
|-------|-----------|------------|----------|--------|---------|
| 1     | 19.167    | 17.925     | 5632241  | 124573 | 49.375  |
| 2     | 25.890    | 24.467     | 5774894  | 80610  | 50.625  |
| Total |           |            | 11407135 | 205183 | 100.000 |

## &lt;Chromatogram&gt;

mV

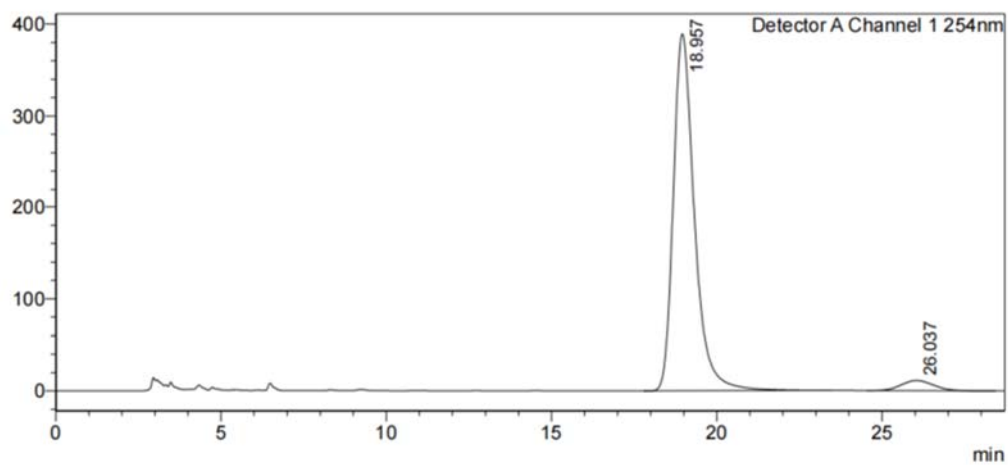

| Peak# | Ret. Time | Peak Start | Area     | Height | Area%   |
|-------|-----------|------------|----------|--------|---------|
| 1     | 18.957    | 17.800     | 17318932 | 389363 | 95.733  |
| 2     | 26.037    | 24.542     | 771891   | 11128  | 4.267   |
| Total |           |            | 18090822 | 400491 | 100.000 |

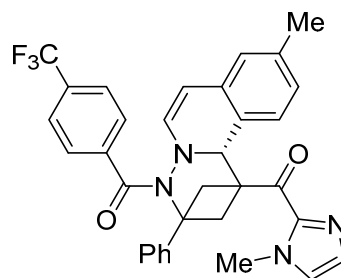**(R)-3qt**C<sub>33</sub>H<sub>27</sub>F<sub>3</sub>N<sub>4</sub>O<sub>2</sub>

M = 568.60 g/mol

**(R)**-(9-methyl-1-(1-methyl-1*H*-imidazole-2-carbonyl)-3-phenyl-1,2,3,11*b*-tetrahydro-4*H*-1,3-methanopyridazino[6,1-*a*]isoquinolin-4-yl)(4-(trifluoromethyl)phenyl)methanone ((**R**)-**3qt**):

Prepared from (1-methyl-1*H*-imidazol-2-yl)(3-phenylbicyclo[1.1.0]butan-1-yl)methanone (**1q**, 47.7 mg, 0.20 mmol) and (6-methylisoquinolin-2-ium-2-yl)(4-(trifluoromethyl)benzoyl)amide (**2t**, 79.3 mg, 0.24 mmol) at room temperature for 16 h according to the **GP4**. Purification by flash chromatography on silica gel using petroleum ether/EtOAc (3/1) afforded (**R**)-**3qt** as a yellow solid (74.9 mg, 66% yield).

**(R)-3qt**:  $R_f = 0.25$  (petroleum ether/EtOAc = 3/1). Mp: 227-229 °C. HPLC analysis (Chiralpak AD-H, <sup>i</sup>PrOH/hexane = 15/85, 1.0 mL/min, 254 nm;  $t_r$  (major) = 12.90 min,  $t_r$  (minor) = 24.23 min) gave the isomeric composition of the product: 91% **ee**.  $[\alpha]_D^{20} = -113.6$  ( $c = 0.25$ , CHCl<sub>3</sub>). **<sup>1</sup>H NMR** (400 MHz, CDCl<sub>3</sub>):  $\delta$  7.77 (d,  $J = 8.0$  Hz, 2H), 7.59 (d,  $J = 8.4$  Hz, 2H), 7.43 (d,  $J = 7.2$  Hz, 2H), 7.35 (t,  $J = 7.6$  Hz, 2H), 7.22 (d,  $J = 8.4$  Hz, 2H), 7.00 (s, 1H), 6.81 (d,  $J = 8.0$  Hz, 1H), 6.62 (s, 1H), 6.41 (d,  $J = 7.6$  Hz, 1H), 5.77 (d,  $J = 8.0$  Hz, 1H), 5.65 (s, 1H), 5.29 (d,  $J = 8.0$  Hz, 1H), 3.74 (s, 3H), 3.73-3.68 (m, 1H), 3.36 (d,  $J = 10.8$  Hz, 1H), 3.30 (d,  $J = 8.4$  Hz, 1H), 2.39 (d,  $J = 11.2$  Hz, 1H), 2.10 (s, 3H) ppm. **<sup>13</sup>C NMR** (100 MHz, CDCl<sub>3</sub>):  $\delta$  190.6, 173.7, 142.6, 141.8, 140.4, 139.3, 138.3, 131.9 (q,  $J = 32.4$  Hz), 130.7, 129.8, 128.3, 128.2, 126.9, 126.6, 126.4, 125.8, 125.6, 125.3, 124.85, 124.83 (q,  $J = 3.2$  Hz), 123.7 (q,  $J = 270.8$  Hz), 101.3, 68.83, 68.78, 58.7, 48.3, 40.9, 35.6, 20.8 ppm. **<sup>19</sup>F NMR** (376 MHz, CDCl<sub>3</sub>):  $\delta$  -62.81 ppm. **HRMS** (ESI)  $m/z$ : [M+Na]<sup>+</sup> calcd. for C<sub>33</sub>H<sub>27</sub>F<sub>3</sub>N<sub>4</sub>O<sub>2</sub>Na: 591.1978; found: 591.1978.

## &lt;Chromatogram&gt;

mV

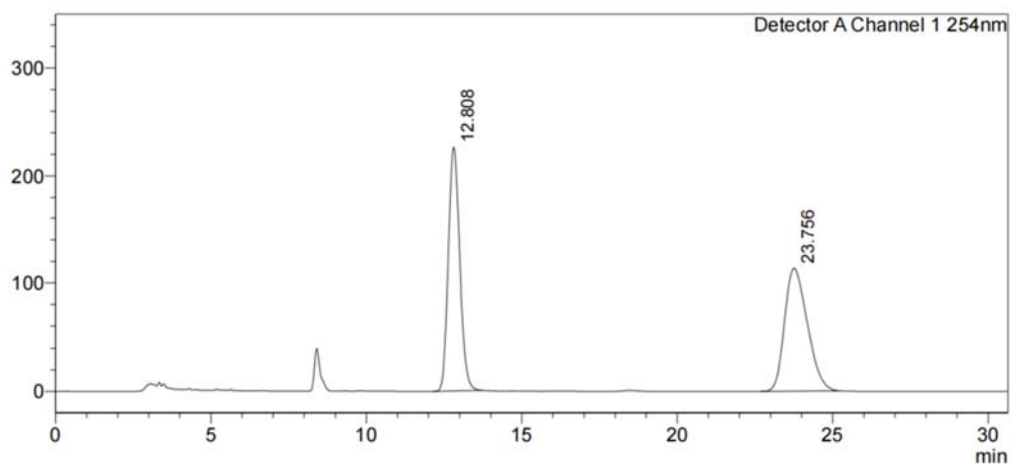

| Peak# | Ret. Time | Peak Start | Area     | Height | Area%   |
|-------|-----------|------------|----------|--------|---------|
| 1     | 12.808    | 12.150     | 5735894  | 226258 | 49.808  |
| 2     | 23.756    | 22.692     | 5780037  | 113527 | 50.192  |
| Total |           |            | 11515931 | 339785 | 100.000 |

## &lt;Chromatogram&gt;

mV

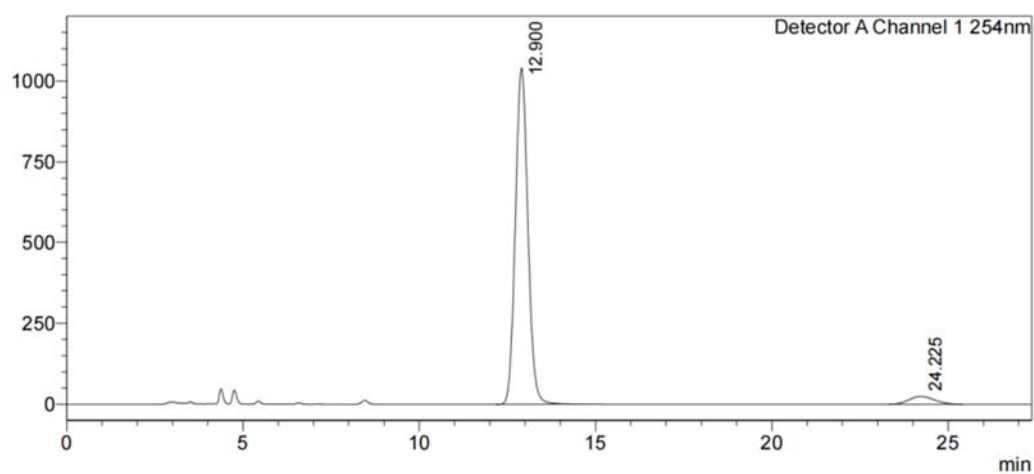

| Peak# | Ret. Time | Peak Start | Area     | Height  | Area%   |
|-------|-----------|------------|----------|---------|---------|
| 1     | 12.900    | 12.183     | 25657646 | 1040395 | 95.521  |
| 2     | 24.225    | 23.325     | 1203150  | 24199   | 4.479   |
| Total |           |            | 26860796 | 1064593 | 100.000 |

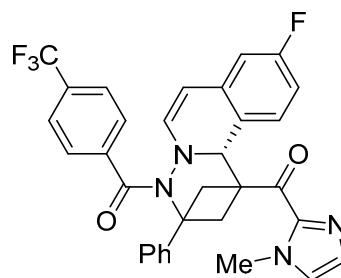**(R)-3pu**

$C_{32}H_{24}F_4N_4O_2$   
 M = 572.56 g/mol

**(R)-9-fluoro-1-(1-methyl-1*H*-imidazole-2-carbonyl)-3-phenyl-1,2,3,11b-tetrahydro-4*H*-1,3-methanopyridazino[6,1-*a*]isoquinolin-4-yl)(4-(trifluoromethyl)phenyl)methanone ((R)-3qu):**

Prepared from (1-methyl-1*H*-imidazol-2-yl)(3-phenylbicyclo[1.1.0]butan-1-yl)methanone (**1q**, 47.7 mg, 0.20 mmol) and (6-fluoroisoquinolin-2-ium-2-yl)(4-(trifluoromethyl)benzoyl)amide (**2u**, 80.2mg, 0.24 mmol) at room temperature for 16 h according to the **GP4**. Purification by flash chromatography on silica gel using petroleum ether/EtOAc (3/1) afforded (*R*)-**3qu** as a yellow solid (94.6 mg, 83% yield).

**(R)-3qu:**  $R_f = 0.35$  (petroleum ether/EtOAc = 3/1). Mp: 123-125 °C. HPLC analysis (Chiralpak AD-H,  $i$ PrOH/hexane = 10/90, 1.0 mL/min, 254 nm;  $t_r$  (major) = 13.98 min,  $t_r$  (minor) = 33.06 min) gave the isomeric composition of the product: 93% *ee*.  $[\alpha]_D^{20} = -114.7$ . ( $c = 2.18$ ,  $CHCl_3$ ).  **$^1H$  NMR** (400 MHz,  $CDCl_3$ ):  $\delta$  7.77 (d,  $J = 8.0$  Hz, 2H), 7.62 (d,  $J = 8.0$  Hz, 2H), 7.42 (d,  $J = 7.6$  Hz, 2H), 7.35 (t,  $J = 7.6$  Hz, 2H), 7.24-7.21 (m, 2H), 7.02 (s, 1H), 6.87 (d,  $J = 8.0$  Hz, 1H), 6.48 (d,  $J = 9.2$  Hz, 1H), 6.27 (t,  $J = 8.4$  Hz, 1H), 5.89 (t,  $J = 7.6$  Hz, 1H), 5.65 (s, 3H), 5.28 (d,  $J = 8.0$  Hz, 1H), 3.78 (s, 3H), 3.68 (t,  $J = 11.2$  Hz, 1H), 3.35 (d,  $J = 10.8$  Hz, 1H), 3.27 (t,  $J = 9.2$  Hz, 1H), 2.42 (d,  $J = 11.6$  Hz, 1H) ppm.  **$^{13}C$  NMR** (100 MHz,  $CDCl_3$ ):  $\delta$  190.5, 173.6, 162.7 (d,  $J = 245.2$  Hz), 142.5, 141.6, 141.5, 139.1, 133.4 (d,  $J = 8.6$  Hz), 132.2 (q,  $J = 32.3$  Hz), 130.0, 128.4, 128.3, 128.1 (d,  $J = 8.4$  Hz), 127.1, 126.8, 125.0 (q,  $J = 3.8$  Hz), 124.9, 123.9 (d,  $J = 3.2$  Hz), 123.7 (q,  $J = 271.0$  Hz), 111.6 (d,  $J = 4.0$  Hz), 111.3 (d,  $J = 4.6$  Hz), 100.5 (d,  $J = 2.2$  Hz), 68.9, 68.7, 58.7, 48.3, 41.3, 35.8 ppm.  **$^{19}F$  NMR** (376 MHz,  $CDCl_3$ ):  $\delta$  -62.89, -113.80 ppm. **HRMS** (ESI)  $m/z$ :  $[M+Na]^+$  calcd. for  $C_{32}H_{24}F_4N_4O_2Na$ : 595.1728; found: 595.1721

## &lt;Chromatogram&gt;

mV

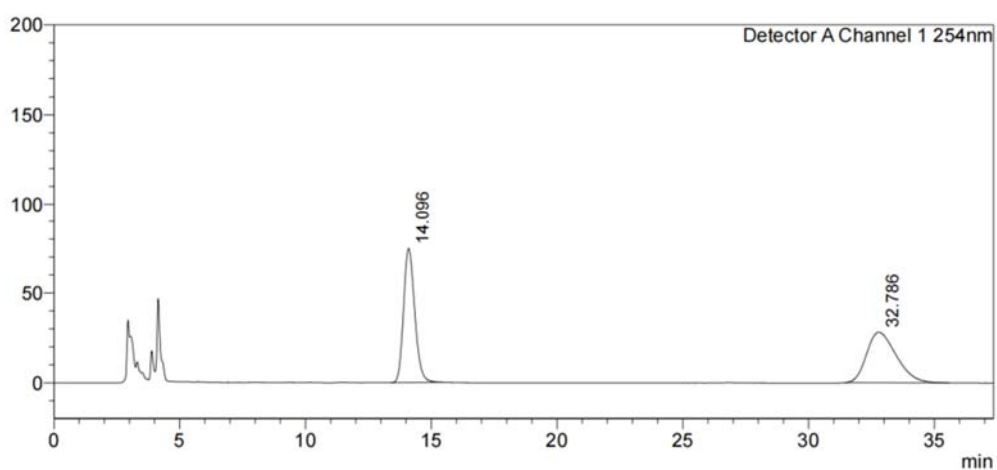

| Peak# | Ret. Time | Peak Start | Area    | Height | Area%   |
|-------|-----------|------------|---------|--------|---------|
| 1     | 14.096    | 13.408     | 2307361 | 74728  | 50.126  |
| 2     | 32.786    | 31.467     | 2295799 | 28063  | 49.874  |
| Total |           |            | 4603160 | 102791 | 100.000 |

## &lt;Chromatogram&gt;

mV

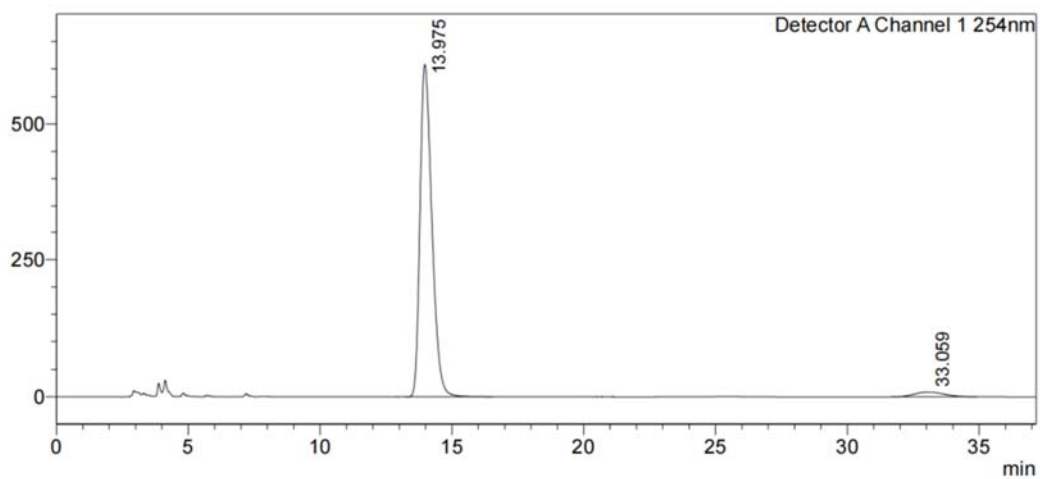

| Peak# | Ret. Time | Peak Start | Area     | Height | Area%   |
|-------|-----------|------------|----------|--------|---------|
| 1     | 13.975    | 13.217     | 19019220 | 607908 | 96.498  |
| 2     | 33.059    | 31.700     | 690238   | 8757   | 3.502   |
| Total |           |            | 19709458 | 616665 | 100.000 |



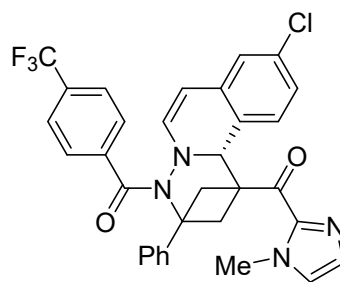**(R)-3qv**C<sub>32</sub>H<sub>24</sub>ClF<sub>3</sub>N<sub>4</sub>O<sub>2</sub>

M = 589.02 g/mol

**(R)-(9-chloro-1-(1-methyl-1*H*-imidazole-2-carbonyl)-3-phenyl-1,2,3,11b-tetrahydro-4*H*-1,3-methanopyridazino[6,1-*a*]isoquinolin-4-yl)(4-(trifluoromethyl)phenyl)methanone ((R)-3qv)** : Prepared from (1-methyl-1*H*-imidazol-2-yl)(3-phenylbicyclo[1.1.0]butan-1-yl)methanone (**1q**, 47.7 mg, 0.20 mmol) and (6-chloroisoquinolin-2-ium-2-yl)(4-(trifluoromethyl)benzoyl)amide (**2v**, 84.2mg, 0.24 mmol) at room temperature for 16 h according to the **GP4**. Purification by flash chromatography on silica gel using petroleum ether/EtOAc (3/1) afforded (*R*)-**3qv** as a yellow solid (84.8 mg, 72% yield).

**(R)-3qv**:  $R_f$  = 0.25 (petroleum ether/EtOAc = 3/1). Mp: 220-222 °C. HPLC analysis (Chiralpak OD-H, <sup>i</sup>PrOH/hexane = 10/90, 1.0 mL/min, 254 nm; tr (major) = 24.38 min, tr (minor) = 18.65 min) gave the isomeric composition of the product: 95% ee.  $[\alpha]_D^{20}$  = -118.6 ( $c$  = 1.23, CHCl<sub>3</sub>). **<sup>1</sup>H NMR** (400 MHz, CDCl<sub>3</sub>):  $\delta$  7.76 (d,  $J$  = 8.0 Hz, 2H), 7.62 (d,  $J$  = 8.0 Hz, 2H), 7.42 (d,  $J$  = 7.6 Hz, 2H), 7.35 (t,  $J$  = 7.6 Hz, 2H), 7.23 (d,  $J$  = 12.0 Hz, 2H), 7.03 (s, 1H), 6.86 (d,  $J$  = 7.6 Hz, 1H), 6.77 (s, 1H), 6.55 (d,  $J$  = 8.4 Hz, 1H), 5.85 (d,  $J$  = 8.0 Hz, 1H), 5.64 (s, 1H), 5.27 (d,  $J$  = 8.0 Hz, 1H), 3.79 (s, 3H), 3.67 (dd,  $J$  = 11.6, 9.2 Hz, 1H), 3.35 (d,  $J$  = 10.4 Hz, 1H), 3.26 (t,  $J$  = 9.2 Hz, 1H), 2.42 (d,  $J$  = 11.6 Hz, 1H) ppm. **<sup>13</sup>C NMR** (100 MHz, CDCl<sub>3</sub>):  $\delta$  190.3, 173.6, 142.5, 141.5, 139.1, 134.4, 132.9, 132.2 (q,  $J$  = 32.4 Hz), 130.0, 128.33, 128.28, 127.8, 127.1, 126.8, 126.5, 125.0 (q,  $J$  = 3.7 Hz), 124.9, 124.8, 124.6, 123.7 (q,  $J$  = 270.8 Hz), 100.2, 68.9, 68.6, 58.7, 48.4, 41.3, 35.8 ppm. **<sup>19</sup>F NMR** (376 MHz, CDCl<sub>3</sub>):  $\delta$  -62.89 ppm. **HRMS** (ESI)  $m/z$ : [M+H]<sup>+</sup> calcd. for C<sub>32</sub>H<sub>25</sub>ClF<sub>3</sub>N<sub>4</sub>O<sub>2</sub>: 589.1613; found: 589.1614.

## &lt;Chromatogram&gt;

mV

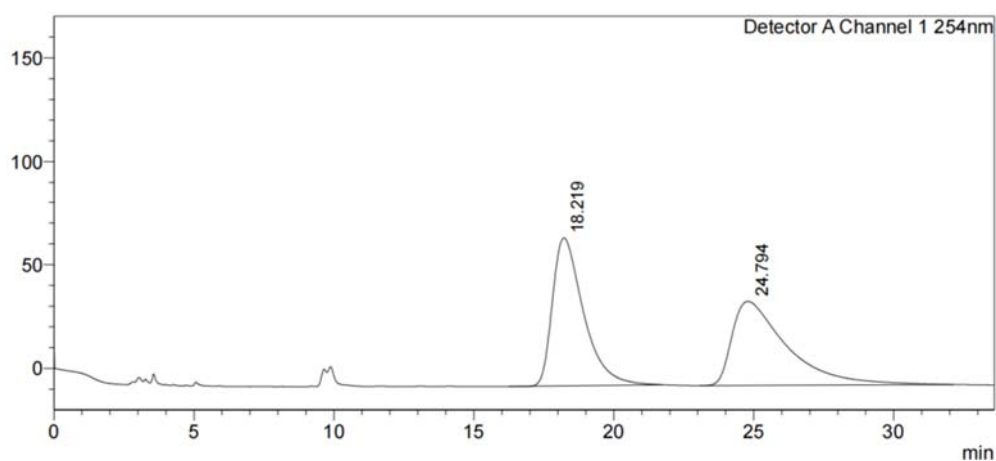

| Peak# | Ret. Time | Peak Start | Area     | Height | Area%   |
|-------|-----------|------------|----------|--------|---------|
| 1     | 18.219    | 16.267     | 5501595  | 71229  | 49.965  |
| 2     | 24.794    | 23.075     | 5509235  | 40458  | 50.035  |
| Total |           |            | 11010830 | 111688 | 100.000 |

## &lt;Chromatogram&gt;

mV

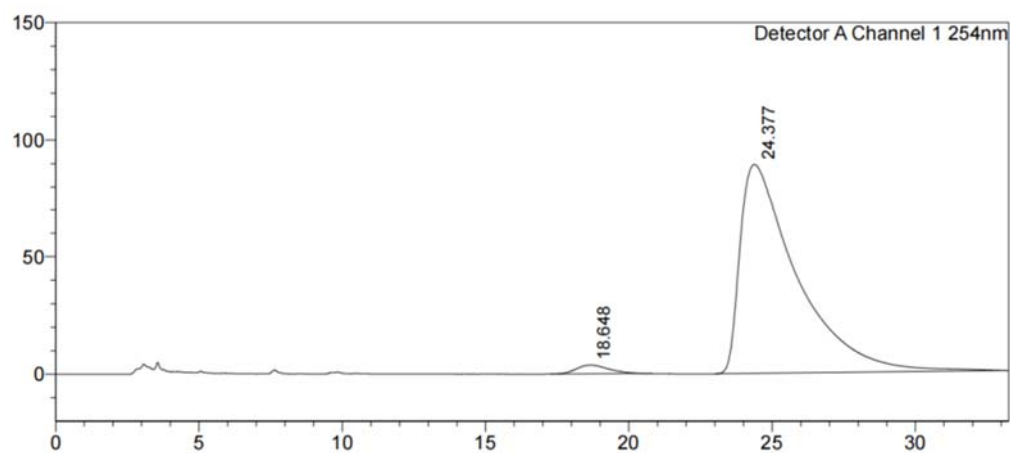

| Peak# | Ret. Time | Peak Start | Area     | Height | Area%   |
|-------|-----------|------------|----------|--------|---------|
| 1     | 18.648    | 17.258     | 298409   | 3743   | 2.365   |
| 2     | 24.377    | 23.042     | 12319093 | 89281  | 97.635  |
| Total |           |            | 12617502 | 93024  | 100.000 |

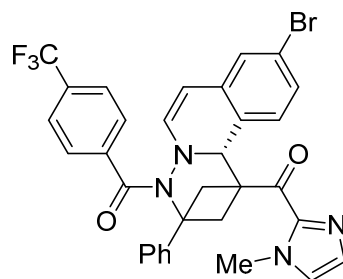**(R)-3qw**

$C_{32}H_{24}BrF_3N_4O_2$   
 M = 633.47 g/mol

**(R)-(9-bromo-1-(1-methyl-1H-imidazole-2-carbonyl)-3-phenyl-1,2,3,11b-tetrahydro-4H-1,3-methanopyridazino[6,1-a]isoquinolin-4-yl)(4-(trifluoromethyl)phenyl)methanone ((R)-3qw):**

Prepared from (1-methyl-1H-imidazol-2-yl)(3-phenylbicyclo[1.1.0]butan-1-yl)methanone (**1q**, 47.7 mg, 0.20 mmol) and (6-bromoisoquinolin-2-ium-2-yl)(4-(trifluoromethyl)benzoyl)amide (**2w**, 94.8 mg, 0.24 mmol) at room temperature for 16 h according to the **GP4**. Purification by flash chromatography on silica gel using petroleum ether/EtOAc (3/1) afforded (**R**)-**3qw** as a yellow solid (78.5 mg, 62% yield).

**(R)-3qw**:  $R_f$  = 0.35 (petroleum ether/EtOAc = 3/1). Mp: 238-240 °C. HPLC analysis (Chiralpak AD-H,  $i$ PrOH/hexane = 15/85, 1.0 mL/min, 254 nm;  $t_r$  (major) = 15.95 min,  $t_r$  (minor) = 51.82 min) gave the isomeric composition of the product: 93% *ee*.  $[\alpha]_D^{20}$  = -137.2 ( $c$  = 1.03,  $CHCl_3$ ).  **$^1H$  NMR** (400 MHz,  $CDCl_3$ ):  $\delta$  7.76 (d,  $J$  = 8.0 Hz, 2H), 7.61 (d,  $J$  = 8.4 Hz, 2H), 7.41 (d,  $J$  = 7.6 Hz, 2H), 7.35 (t,  $J$  = 7.6 Hz, 2H), 7.24-7.20 (m, 2H), 7.01 (s, 1H), 6.91 (d,  $J$  = 1.2 Hz, 1H), 6.85 (d,  $J$  = 8.0 Hz, 1H), 6.69 (dd,  $J$  = 8.0, 1.6 Hz, 1H), 5.79 (d,  $J$  = 8.0 Hz, 1H), 5.64 (s, 1H), 5.25 (d,  $J$  = 7.6 Hz, 1H), 3.77 (s, 3H), 3.66 (dd,  $J$  = 11.2, 8.8 Hz, 1H), 3.35 (d,  $J$  = 10.8 Hz, 1H), 3.27 (t,  $J$  = 8.8 Hz, 1H), 2.42 (d,  $J$  = 11.6 Hz, 1H) ppm.  **$^{13}C$  NMR** (100 MHz,  $CDCl_3$ ):  $\delta$  190.2, 173.6, 142.4, 141.5, 139.1, 133.2, 132.6 (q,  $J$  = 32.4 Hz), 129.9, 128.3, 128.2, 128.0, 127.7, 127.4, 127.1, 127.0, 126.8, 124.9 (q,  $J$  = 3.7 Hz), 124.8, 123.7 (q,  $J$  = 270.9 Hz), 122.6, 100.0, 68.9, 68.6, 58.6, 48.3, 41.2, 35.7 ppm.  **$^{19}F$  NMR** (376 MHz,  $CDCl_3$ ):  $\delta$  -62.82 ppm. **HRMS** (ESI)  $m/z$ :  $[M+H]^+$  calcd. for  $C_{32}H_{25}BrF_3N_4O_2$ : 633.1107; found: 633.1105.

## &lt;Chromatogram&gt;

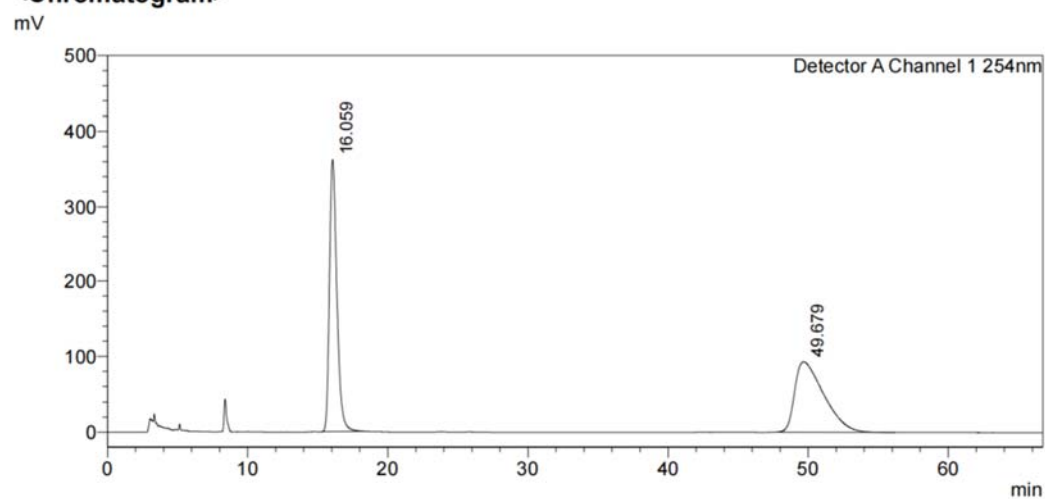

| Peak# | Ret. Time | Peak Start | Area     | Height | Area%   |
|-------|-----------|------------|----------|--------|---------|
| 1     | 16.059    | 15.317     | 13288574 | 361866 | 49.822  |
| 2     | 49.679    | 47.583     | 13383625 | 92675  | 50.178  |
| Total |           |            | 26672199 | 454541 | 100.000 |

## &lt;Chromatogram&gt;

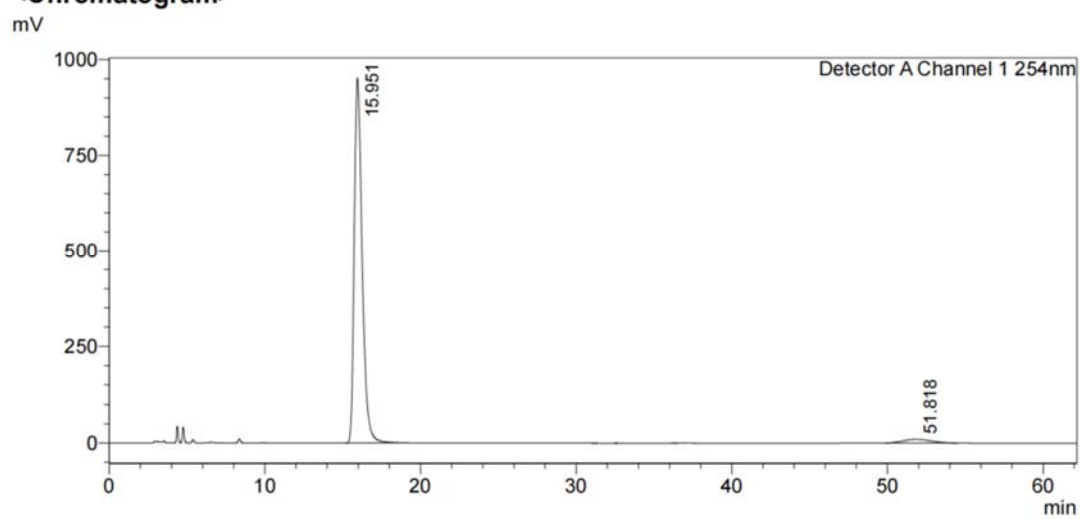

| Peak# | Ret. Time | Peak Start | Area     | Height | Area%   |
|-------|-----------|------------|----------|--------|---------|
| 1     | 15.951    | 15.192     | 33524026 | 951070 | 96.553  |
| 2     | 51.818    | 49.892     | 1196951  | 9636   | 3.447   |
| Total |           |            | 34720977 | 960706 | 100.000 |

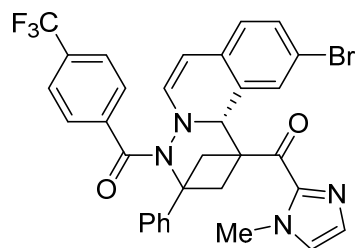**(R)-3qx**

$C_{32}H_{24}BrF_3N_4O_2$   
 M = 633.47 g/mol

**(R)-(10-bromo-1-(1-methyl-1H-imidazole-2-carbonyl)-3-phenyl-1,2,3,11b-tetrahydro-4H-1,3-methanopyridazino[6,1-a]isoquinolin-4-yl)(4-(trifluoromethyl)phenyl)methanone ((R)-3qx)** : Prepared from (1-methyl-1H-imidazol-2-yl)(3-phenylbicyclo[1.1.0]butan-1-yl)methanone (**1q**, 47.7 mg, 0.20 mmol) and (7-bromoisoquinolin-2-ium-2-yl)(4-(trifluoromethyl)benzoyl)amide (**2x**, 94.8 mg, 0.24 mmol) at room temperature in  $CH_2Cl_2/MeCN$  (10/1) for 16 h according to the **GP4**. Purification by flash chromatography on silica gel using petroleum ether/EtOAc (3/1) afforded **(R)-3qx** as a yellow solid (102.0 mg, 81% yield).

**(R)-3qx**:  $R_f$  = 0.5 (petroleum ether/EtOAc = 3/1). Mp: 144-147 °C. HPLC analysis (Chiralpak IC,  $iPrOH/hexane$  = 5/95, 1.0 mL/min, 254 nm;  $t_r$  (major) = 30.69 min,  $t_r$  (minor) = 24.61 min) gave the isomeric composition of the product: 95% ee.  $[\alpha]_D^{20} = -147.2$  ( $c$  = 0.63,  $CHCl_3$ ).  **$^1H$  NMR** (400 MHz,  $CDCl_3$ ):  $\delta$  7.76 (d,  $J$  = 8.0 Hz, 2H), 7.61 (d,  $J$  = 8.0 Hz, 2H), 7.43 (d,  $J$  = 7.2 Hz, 2H), 7.36 (t,  $J$  = 7.2 Hz, 2H), 7.24 (d,  $J$  = 6.8 Hz, 2H), 7.56 (d,  $J$  = 6.4 Hz, 2H), 6.83 (d,  $J$  = 7.6 Hz, 1H), 6.63 (d,  $J$  = 8.0 Hz, 1H), 5.84 (s, 1H), 5.55 (s, 1H), 5.27 (d,  $J$  = 8.0 Hz, 1H), 3.81 (s, 3H), 3.67 (t,  $J$  = 9.6 Hz, 1H), 3.41 (d,  $J$  = 10.4 Hz, 1H), 3.31 (t,  $J$  = 8.8 Hz, 1H), 2.45 (d,  $J$  = 11.6 Hz, 1H).  **$^{13}C$  NMR** (100 MHz,  $CDCl_3$ ):  $\delta$  190.2, 173.7, 142.6, 141.6, 140.8, 139.1, 132.1 (q,  $J$  = 32.4 Hz), 131.3, 130.08, 130.07, 130.0, 129.7, 128.3, 127.2, 127.1, 126.1, 124.94 (q,  $J$  = 3.7 Hz), 124.87, 123.7 (q,  $J$  = 270.8 Hz), 118.1, 100.3, 68.9, 68.5, 58.8, 48.3, 40.9, 35.8 ppm.  **$^{19}F$  NMR** (376 MHz,  $CDCl_3$ ):  $\delta$  -62.86 ppm. **HRMS** (ESI)  $m/z$ :  $[M+H]^+$  calcd. for  $C_{32}H_{25}BrF_3N_4O_2$ : 633.1107; found: 633.1101.

## &lt;Chromatogram&gt;

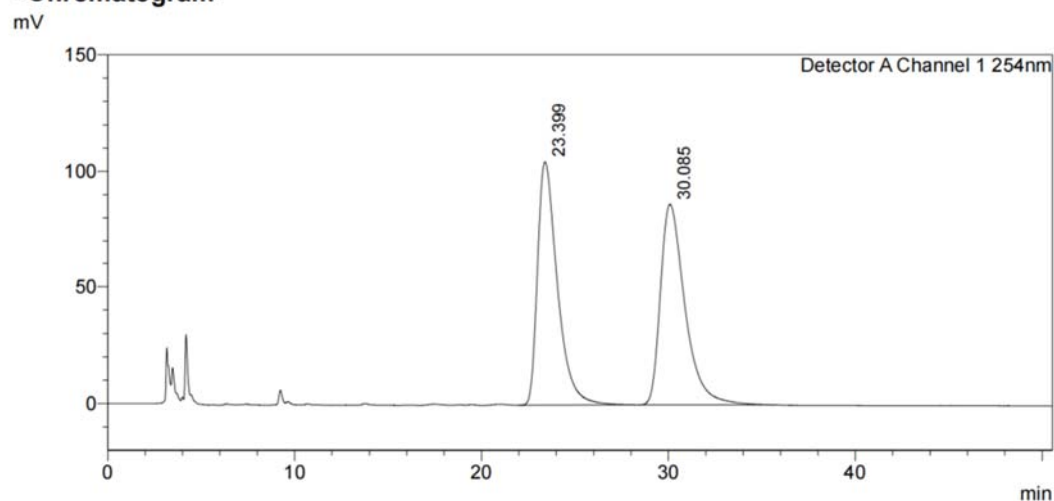

| Peak# | Ret. Time | Peak End | Area     | Height | Area%   |
|-------|-----------|----------|----------|--------|---------|
| 1     | 23.399    | 28.250   | 7718403  | 104822 | 49.524  |
| 2     | 30.085    | 35.758   | 7866848  | 86374  | 50.476  |
| Total |           |          | 15585251 | 191196 | 100.000 |

## &lt;Chromatogram&gt;

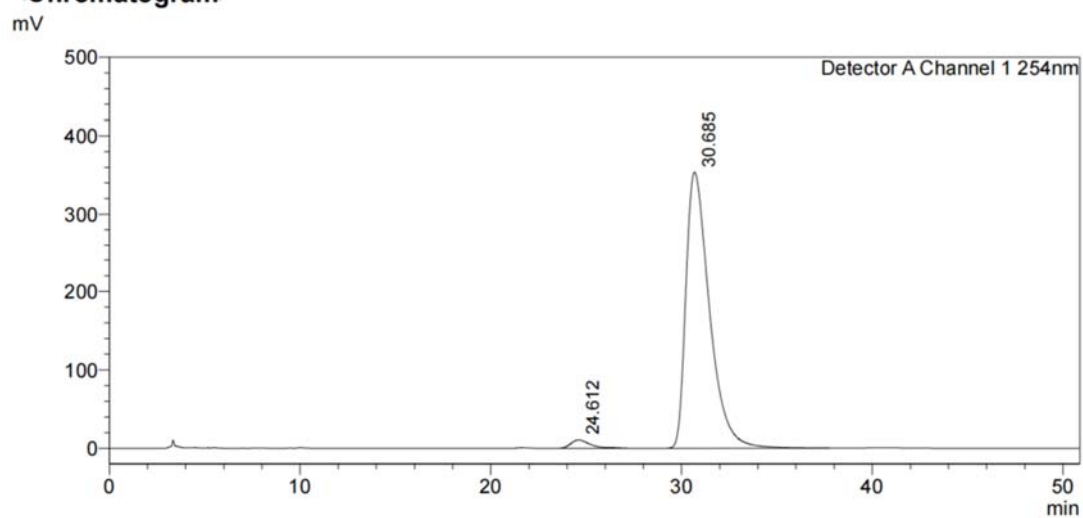

| Peak# | Ret. Time | Peak Start | Area     | Height | Area%   |
|-------|-----------|------------|----------|--------|---------|
| 1     | 24.612    | 23.317     | 764263   | 10589  | 2.458   |
| 2     | 30.685    | 29.133     | 30326136 | 353497 | 97.542  |
| Total |           |            | 31090399 | 364086 | 100.000 |

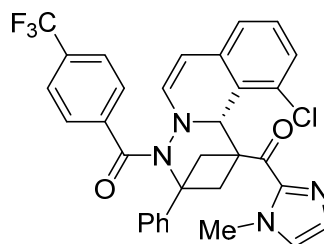**(S)-3qy**

$C_{32}H_{24}ClF_3N_4O_2$   
 M = 589.02 g/mol

**(S)-11-chloro-1-(1-methyl-1*H*-imidazole-2-carbonyl)-3-phenyl-1,2,3,11b-tetrahydro-4*H*-1,3-methanopyridazino[6,1-*a*]isoquinolin-4-yl)(4-(trifluoromethyl)phenyl)methanone ((S)-3qy)** : Prepared from (1-methyl-1*H*-imidazol-2-yl)(3-phenylbicyclo[1.1.0]butan-1-yl)methanone (**1q**, 47.7 mg, 0.20 mmol) and (8-chloroisoquinolin-2-ium-2-yl)(4-(trifluoromethyl)benzoyl)amide (**2y**, 84.2mg, 0.24 mmol) at room temperature for 16 h according to the **GP4**. Purification by flash chromatography on silica gel using petroleum ether/EtOAc (3/1) afforded **(S)-3qy** as a yellow solid (97.5 mg, 83% yield).

**(S)-3qy**:  $R_f$  = 0.25 (petroleum ether/EtOAc = 3/1). Mp: 233-235 °C. HPLC analysis (Chiralpak OD-H,  $i$ PrOH/hexane = 10/90, 1.0 mL/min, 254 nm;  $t_r$  (major) = 19.39 min,  $t_r$  (minor) = 16.71 min) gave the isomeric composition of the product: 93% *ee*.  $[\alpha]_D^{20}$  = 9.4 ( $c$  = 2.00,  $CHCl_3$ ).  **$^1H$  NMR** (400 MHz,  $CDCl_3$ ):  $\delta$  7.75 (d,  $J$  = 8.0 Hz, 2H), 7.61 (d,  $J$  = 8.0 Hz, 2H), 7.46 (d,  $J$  = 7.6 Hz, 2H), 7.36 (t,  $J$  = 7.2 Hz, 2H), 7.23 (d,  $J$  = 7.2 Hz, 1H), 6.96 (d,  $J$  = 7.6 Hz, 1H), 6.82-6.79 (m, 2H), 6.75 (s, 1H), 6.67-6.64 (m, 2H), 5.51 (s, 1H), 5.45 (d,  $J$  = 7.6 Hz, 1H), 4.14 (dd,  $J$  = 10.8, 9.6 Hz, 1H), 3.79 (s, 3H), 3.60 (d,  $J$  = 11.2 Hz, 1H), 3.00 (t,  $J$  = 10.0 Hz, 1H), 2.50 (d,  $J$  = 11.2 Hz, 1H) ppm.  **$^{13}C$  NMR** (100 MHz,  $CDCl_3$ ):  $\delta$  190.0, 173.7, 142.6, 141.5, 141.2, 139.0, 134.5, 132.2 (d,  $J$  = 32.6 Hz), 131.9, 129.31, 129.26, 128.4, 128.3, 127.1, 126.4, 126.1, 125.8, 125.04, 124.99 (q,  $J$  = 3.8 Hz), 123.7 (q,  $J$  = 269.7 Hz), 122.9, 101.6, 68.6, 67.0, 57.8, 45.7, 45.5, 35.8 ppm.  **$^{19}F$  NMR** (376 MHz,  $CDCl_3$ ):  $\delta$  -62.89 ppm. **HRMS** (ESI)  $m/z$ :  $[M+H]^+$  calcd. for  $C_{32}H_{25}ClF_3N_4O_2$ : 589.1613; found:589.1602.

## &lt;Chromatogram&gt;

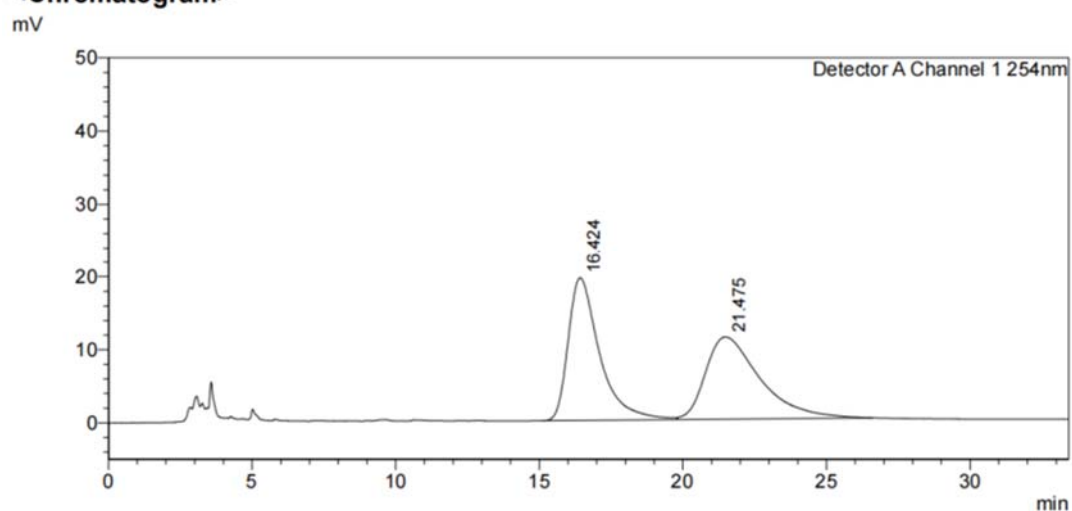

| Peak# | Ret. Time | Peak Start | Area    | Height | Area%   |
|-------|-----------|------------|---------|--------|---------|
| 1     | 16.424    | 15.108     | 1488773 | 19539  | 50.039  |
| 2     | 21.475    | 19.800     | 1486423 | 11263  | 49.961  |
| Total |           |            | 2975196 | 30803  | 100.000 |

## &lt;Chromatogram&gt;

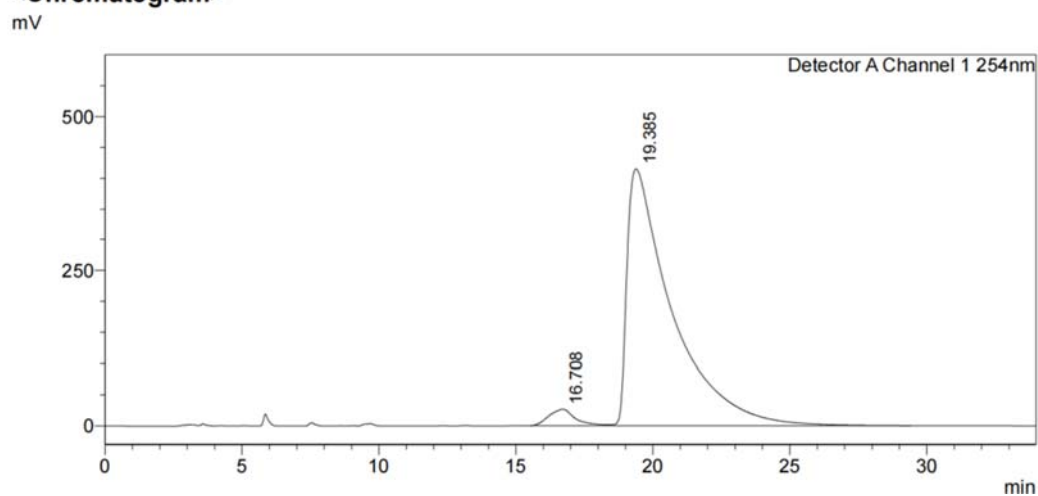

| Peak# | Ret. Time | Peak Start | Area     | Height | Area%   |
|-------|-----------|------------|----------|--------|---------|
| 1     | 16.708    | 15.517     | 1753803  | 26544  | 3.587   |
| 2     | 19.385    | 18.300     | 47142976 | 415019 | 96.413  |
| Total |           |            | 48896779 | 441563 | 100.000 |



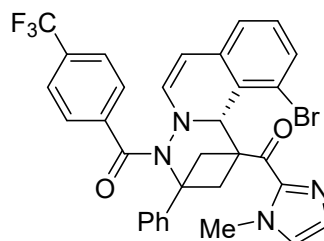**(S)-3qz**

$C_{32}H_{24}BrF_3N_4O_2$   
 M = 633.47 g/mol

**(S)-((11-bromo-1-(1-methyl-1H-imidazole-2-carbonyl)-3-phenyl-1,2,3,11b-tetrahydro-4H-1,3-methanopyridazino[6,1-a]isoquinolin-4-yl)(4-(trifluoromethyl)phenyl)methanone ((R)-3qz):**

Prepared from (1-methyl-1H-imidazol-2-yl)(3-phenylbicyclo[1.1.0]butan-1-yl)methanone (**1q**, 47.7 mg, 0.20 mmol) and (8-bromoisoquinolin-2-ium-2-yl)(4-(trifluoromethyl)benzoyl)amide (**2z**, 94.8 mg, 0.24 mmol) at room temperature for 16 h according to the **GP4**. Purification by flash chromatography on silica gel using petroleum ether/EtOAc (3/1) afforded (S)-**3qz** as a white solid (88.7 mg, 70% yield).

(S)-**3qz**:  $R_f$  = 0.3 (petroleum ether/EtOAc = 3/1). Mp: 210-212 °C. HPLC analysis (Chiralpak AD-H,  $i$ PrOH/hexane = 15/85, 1.0 mL/min, 254 nm; tr (major) = 26.81 min, tr (minor) = 23.47 min) gave the isomeric composition of the product: 97% ee.  $[\alpha]_D^{20}$  = +12.0 ( $c$  = 0.88,  $CHCl_3$ ). **<sup>1</sup>H NMR** (400 MHz,  $CDCl_3$ ):  $\delta$  7.74 (d,  $J$  = 8.0 Hz, 2H), 7.60 (d,  $J$  = 8.4 Hz, 2H), 7.47 (d,  $J$  = 7.2 Hz, 2H), 7.36 (t,  $J$  = 7.6 Hz, 2H), 7.23 (d,  $J$  = 7.2 Hz, 1H), 6.95 (d,  $J$  = 7.6 Hz, 1H), 6.85 (d,  $J$  = 7.6 Hz, 1H), 6.80 (s, 1H), 6.73-6.67 (m, 3H), 5.48 (m, 1H), 5.43 (d,  $J$  = 7.6 Hz, 1H), 4.16 (dd,  $J$  = 11.6, 9.6 Hz, 1H), 3.80 (s, 1H), 3.62 (d,  $J$  = 10.8 Hz, 1H), 2.98 (t,  $J$  = 9.6 Hz, 2H), 2.50 (d,  $J$  = 11.6 Hz, 2H). **<sup>13</sup>C NMR** (100 MHz,  $CDCl_3$ ):  $\delta$  189.9, 173.7, 142.6, 141.5, 141.2, 139.0, 135.0, 132.2 (q,  $J$  = 32.5 Hz), 129.54, 129.45, 129.3, 128.4, 128.2, 128.0, 127.1, 125.8, 125.04, 125.0 (q,  $J$  = 3.9 Hz), 123.7 (q,  $J$  = 270.5 Hz), 123.5, 122.4, 101.8, 69.2, 68.6, 57.8, 46.0, 45.4, 35.9 ppm. **<sup>19</sup>F NMR** (376 MHz,  $CDCl_3$ ):  $\delta$  -62.87 ppm. **HRMS** (ESI)  $m/z$ :  $[M+H]^+$  calcd. for  $C_{32}H_{25}BrF_3N_4O_2$ : 633.1107; found: 633.1102.

## &lt;Chromatogram&gt;

mV

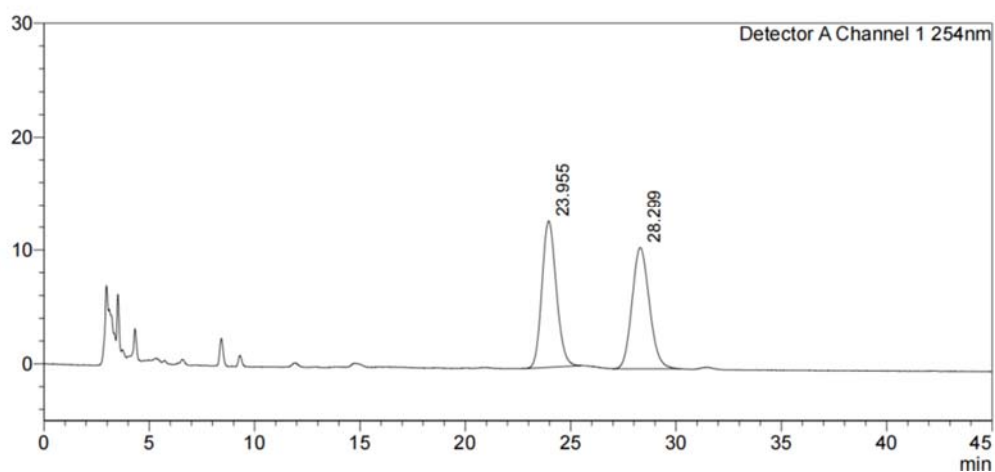

| Peak# | Ret. Time | Peak Start | Area    | Height | Area%   |
|-------|-----------|------------|---------|--------|---------|
| 1     | 23.955    | 22.842     | 611413  | 12845  | 50.052  |
| 2     | 28.299    | 27.008     | 610140  | 10636  | 49.948  |
| Total |           |            | 1221553 | 23481  | 100.000 |

## &lt;Chromatogram&gt;

mV

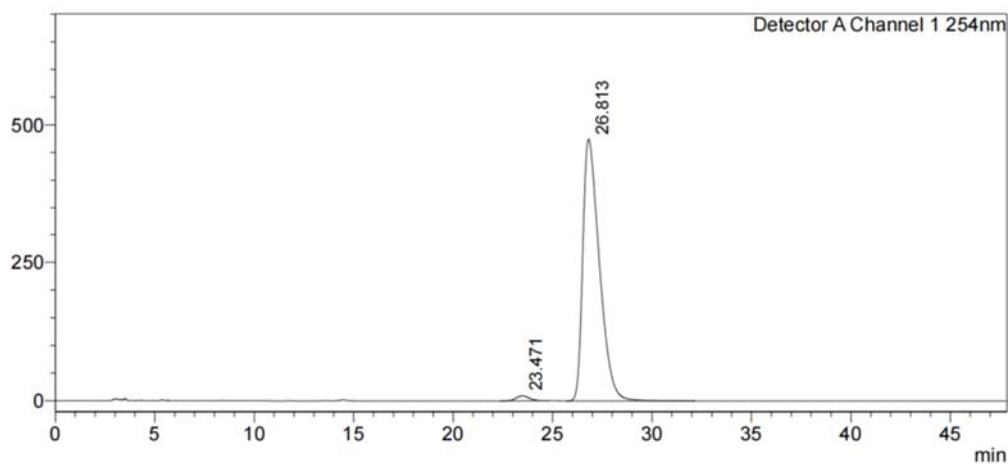

| Peak# | Ret. Time | Peak Start | Area     | Height | Area%   |
|-------|-----------|------------|----------|--------|---------|
| 1     | 23.471    | 22.367     | 424018   | 9133   | 1.519   |
| 2     | 26.813    | 25.700     | 27498640 | 474178 | 98.481  |
| Total |           |            | 27922658 | 483311 | 100.000 |

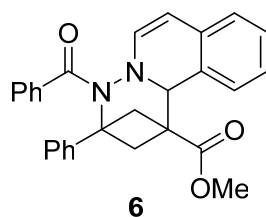

6

$C_{28}H_{24}N_2O_3$   
 M = 436.51 g/mol

**Methyl-4-benzoyl-3-phenyl-3,4-dihydro-2H-1,3-methanopyridazino[6,1-a]**

**isoquinoline-1(11bH)-carboxylate (6):**  $R_f = 0.5$  (petroleum ether/EtOAc = 5/1). Mp: 209-211 °C.  $^1H$  NMR (400 MHz,  $CDCl_3$ ):  $\delta$  7.62 (d,  $J = 7.2$  Hz, 2H), 7.42-7.32 (m, 7H), 7.25-7.22 (m, 1H), 7.09 (t,  $J = 7.2$  Hz, 1H), 6.92 (t,  $J = 7.6$  Hz, 1H), 6.86-6.84 (m, 2H), 6.77 (d,  $J = 7.6$  Hz, 1H), 5.32 (d,  $J = 7.6$  Hz, 1H), 5.16 (s, 1H), 3.56 (d,  $J = 11.2, 9.2$  Hz, 1H), 3.41 (s, 3H), 3.23 (d,  $J = 10.4$  Hz, 1H), 2.82 (d,  $J = 10.0$  Hz, 1H), 2.33 (d,  $J = 11.2$  Hz, 1H) ppm.  $^{13}C$  NMR (100 MHz,  $CDCl_3$ ):  $\delta$  175.2, 171.9, 141.6, 140.6, 135.4, 130.9, 130.8, 128.8, 128.3, 128.1, 128.0, 127.9, 127.2, 127.0, 125.6, 124.7, 124.5, 100.5, 68.2, 67.8, 53.6, 51.7, 45.7, 41.1 ppm. HRMS (ESI)  $m/z$ :  $[M+H]^+$  calcd. for  $C_{28}H_{25}N_2O_3$ : 437.1860; found: 437.1864.

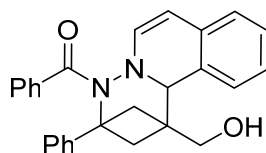

7

$C_{27}H_{24}N_2O_2$   
 M = 408.50 g/mol

**(1-(hydroxymethyl)-3-phenyl-1,2,3,11b-tetrahydro-4H-1,3-methanopyridazino**

**[6,1-a]isoquinolin-4-yl)(phenyl)methanone (7):**  $R_f = 0.35$  (petroleum ether/EtOAc = 5/1). Mp: 193-195 °C.  $^1H$  NMR (400 MHz,  $CDCl_3$ ):  $\delta$  7.62 (d,  $J = 7.2$  Hz, 2H), 7.44 (d,  $J = 7.6$  Hz, 2H), 7.40-7.30 (m, 5H), 7.24-7.21 (m, 1H), 7.13-7.09 (m, 1H), 6.98-6.97 (m, 2H), 6.84 (d,  $J = 7.6$  Hz, 2H), 5.27 (d,  $J = 7.6$  Hz, 1H), 4.93 (s, 1H), 3.43 (d,  $J = 11.2$  Hz, 1H), 3.34 (d,  $J = 11.6$  Hz, 1H), 3.25 (t,  $J = 9.2$  Hz, 1H), 3.00 (d,  $J = 10.0$  Hz, 1H), 2.46 (t,  $J = 9.6$  Hz, 1H), 2.03 (d,  $J = 10.8$  Hz, 1H), 1.20 (s, br, 1H) ppm.  $^{13}C$  NMR (100 MHz,  $CDCl_3$ ):  $\delta$  175.2, 142.6, 141.7, 135.8, 131.5, 130.6, 128.6, 128.2, 128.1, 128.0,

127.99, 127.8, 126.8, 125.6, 124.8, 124.3, 100.0, 69.7, 68.8, 64.5, 48.5, 43.9, 40.8 ppm. **HRMS** (ESI)  $m/z$ :  $[M+K]^+$  calcd. for  $C_{27}H_{24}N_2O_2K$ : 447.1469; found:447.1463.

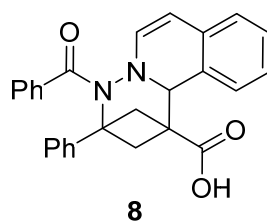

**8**

$C_{27}H_{22}N_2O_3$   
M = 422.48 g/mol

**4-benzoyl-3-phenyl-3,4-dihydro-2H-1,3-methanopyridazino[6,1-a]isoquinoline-**

**1(11bH)-carboxylic acid (8):**  $R_f$  = 0.3 (petroleum ether/EtOAc = 1/2). Mp: 145-147 °C.

**$^1H$  NMR** (400 MHz,  $CDCl_3$ )  $\delta$  7.61 (d,  $J$  = 7.2 Hz, 2H), 7.41-7.33 (m, 7H), 7.24-7.22 (m, 1H), 7.04 (t,  $J$  = 7.6 Hz, 1H), 6.91 (d,  $J$  = 7.6 Hz, 1H), 6.84-6.77 (m, 3H), 5.31 (d,  $J$  = 7.6 Hz, 1H), 5.19 (s, 1H), 3.54 (t,  $J$  = 10.4 Hz, 1H), 3.22 (d,  $J$  = 10.4 Hz, 1H), 2.81 (t,  $J$  = 9.6 Hz, 1H), 2.33 (d,  $J$  = 11.6 Hz, 1H) ppm.  **$^{13}C$  NMR** (100 MHz,  $CDCl_3$ ):  $\delta$  176.9, 175.3, 141.5, 140.5, 135.3, 130.9, 130.8, 128.8, 128.3, 128.1, 127.9, 127.7, 127.0, 125.8, 124.8, 124.4, 100.6, 68.0, 67.6, 53.5, 46.0, 41.1 ppm. **HRMS** (ESI)  $m/z$ :  $[M+H]^+$  calcd. for  $C_{27}H_{23}N_2O_3$ : 423.1703; found: 423.1701.

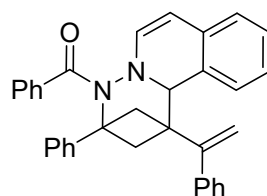

**9**

$C_{34}H_{28}N_2O$   
M = 480.61 g/mol

**phenyl(3-phenyl-1-(1-phenylvinyl)-1,2,3,11b-tetrahydro-4H-1,3-methano**

**pyridazino[6,1-a]isoquinolin-4-yl)methanone (9):**  $R_f$  = 0.7 (petroleum ether/EtOAc

= 5/1). Mp: 182-184 °C.  **$^1H$  NMR** (400 MHz,  $CDCl_3$ ):  $\delta$  7.70 (d,  $J$  = 7.2 Hz, 2H), 7.41-7.30 (m, 7H), 7.22-7.14(m, 6H), 6.96-6.90 (m, 2H), 6.78 (d,  $J$  = 7.2 Hz, 1H), 6.69-6.61 (m, 2H), 5.35 (s, 1H), 5.34 (s, 1H), 5.21 (s, 1H), 4.76 (s, 1H), 3.70 (t,  $J$  = 10.0 Hz, 1H), 3.09 (d,  $J$  = 10.0 Hz, 1H), 2.96 (d,  $J$  = 9.6 Hz, 1H), 2.14 (d,  $J$  = 11.2 Hz, 1H) ppm.  **$^{13}C$**

**NMR** (100 MHz, CDCl<sub>3</sub>):  $\delta$  175.1, 150.0, 142.2, 141.2, 139.2, 135.6, 131.1, 130.7, 129.5, 128.9, 128.3, 128.14, 128.09, 128.06, 127.8, 127.3, 126.7, 126.5, 125.0, 124.8, 123.7, 115.6, 100.1, 71.7, 68.2, 53.5, 48.8, 45.1 ppm. **HRMS** (ESI)  $m/z$ : [M+H]<sup>+</sup> calcd. for C<sub>34</sub>H<sub>29</sub>N<sub>2</sub>O: 481.2274; found:484.2267.

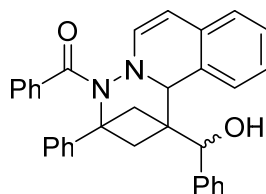

**10**

C<sub>33</sub>H<sub>28</sub>N<sub>2</sub>O<sub>2</sub>

M = 484.60 g/mol

*d.r.* = 5:1

**(1-(hydroxy(phenyl)methyl)-3-phenyl-1,2,3,11b-tetrahydro-4H-1,3-methanopyridazino[6,1-a]isoquinolin-4-yl)(phenyl)methanone (10):**  $R_f$  (major)= 0.5 (petroleum ether/EtOAc = 5/1). Mp: 258-260 °C. **<sup>1</sup>H NMR for the major isomer** (400 MHz, CDCl<sub>3</sub>):  $\delta$  7.63 (d,  $J$  = 7.2 Hz, 2H), 7.40-7.29 (m, 6H), 7.25-7.23 (m, 2H), 7.21-7.13 (m, 6H), 7.01-6.97 (m, 2H), 6.92 (d,  $J$  = 8.0 Hz, 1H), 6.89 (d,  $J$  = 7.6 Hz, 1H), 5.38 (d,  $J$  = 7.6 Hz, 1H), 4.93 (s, 1H), 4.74 (s, 1H), 3.36-3.27 (m, 1H), 2.34 (d,  $J$  = 4.0 Hz, 2H), 2.10 (d,  $J$  = 11.2 Hz, 1H), 1.58 (br s, 1H) ppm. **<sup>13</sup>C NMR for the major isomer** (100 MHz, CDCl<sub>3</sub>):  $\delta$  175.0, 142.5, 142.2, 139.6, 135.6, 132.1, 130.7, 129.1, 128.3, 128.2, 128.1, 127.82, 127.76, 127.1, 126.6, 126.0, 124.6, 124.3, 100.3, 72.4, 70.7, 68.9, 51.8, 45.0, 38.2 ppm. **HRMS** (ESI)  $m/z$ : [M+H]<sup>+</sup> calcd. for C<sub>33</sub>H<sub>29</sub>N<sub>2</sub>O<sub>2</sub>: 485.2224; found: 485.2216.

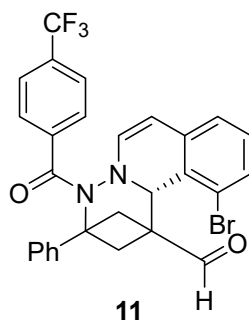

**11**

C<sub>28</sub>H<sub>20</sub>BrF<sub>3</sub>N<sub>2</sub>O<sub>2</sub>

M = 553.38 g/mol

**(S)-11-bromo-3-phenyl-4-(4-(trifluoromethyl)benzoyl)-3,4-dihydro-2H-1,3-methanopyridazino[6,1-a]isoquinoline-1(11bH)-carbaldehyde (11):**  $R_f = 0.5$  (petroleum ether/EtOAc = 5/1). Mp: 67-69 °C. HPLC analysis (Chiralpak AD-H,  $i$ PrOH/hexane = 10/90, 1.0 mL/min, 254 nm; tr (major) = 16.62 min, tr (minor) = 26.05 min gave the isomeric composition of the product: 96% ee.  $[\alpha]_D^{20} = +10.3$  ( $c = 0.40$ ,  $\text{CHCl}_3$ ).  **$^1\text{H NMR}$**  (400 MHz,  $\text{CDCl}_3$ ):  $\delta$  9.33 (s, 1H), 7.65 (d,  $J = 8.0$  Hz, 2H), 7.55 (d,  $J = 8.0$  Hz, 2H), 7.36 (d,  $J = 7.2$  Hz, 2H), 7.30 (t,  $J = 7.2$  Hz, 2H), 7.21-7.17 (m, 1H), 7.13 (d,  $J = 8.0$  Hz, 1H), 6.95 (t,  $J = 7.6$  Hz, 1H), 6.79 (t,  $J = 8.4$  Hz, 2H), 5.27 (s, 1H), 5.25 (s, 1H), 3.52 (t,  $J = 9.6$  Hz, 1H), 3.44 (d,  $J = 10.4$  Hz, 1H), 2.45 (t,  $J = 9.2$  Hz, 1H), 2.02 (d,  $J = 10.8$  Hz, 1H) ppm.  **$^{13}\text{C NMR}$**  (100 MHz,  $\text{CDCl}_3$ ):  $\delta$  198.0, 173.7, 141.3, 141.0, 138.7, 134.0, 132.5 (q,  $J = 32.5$  Hz), 130.6, 130.5, 128.41, 128.40, 127.4, 125.9, 125.1 (q,  $J = 3.7$  Hz), 124.8, 124.2, 123.7, 123.6 (q,  $J = 271.0$  Hz), 100.9, 69.1, 67.5, 54.8, 43.6, 41.2 ppm.  **$^{19}\text{F NMR}$**  (376 MHz,  $\text{CDCl}_3$ ):  $\delta$  -62.90 ppm. **HRMS** (ESI)  $m/z$ :  $[\text{M}+\text{Na}]^+$  calcd. for  $\text{C}_{28}\text{H}_{20}\text{BrF}_3\text{N}_2\text{O}_2\text{Na}$ : 575.0550; found:575.0531.

## &lt;Chromatogram&gt;

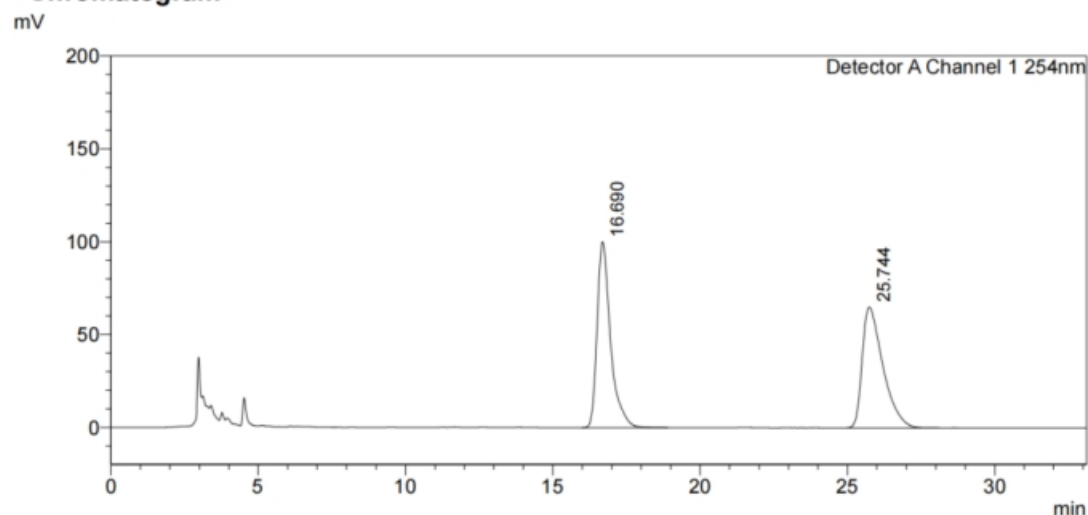

| Peak# | Ret. Time | Peak Start | Area    | Height | Area%   |
|-------|-----------|------------|---------|--------|---------|
| 1     | 16.690    | 15.983     | 3172596 | 100044 | 49.878  |
| 2     | 25.744    | 24.842     | 3188156 | 64975  | 50.122  |
| Total |           |            | 6360752 | 165019 | 100.000 |

## &lt;Chromatogram&gt;

mV

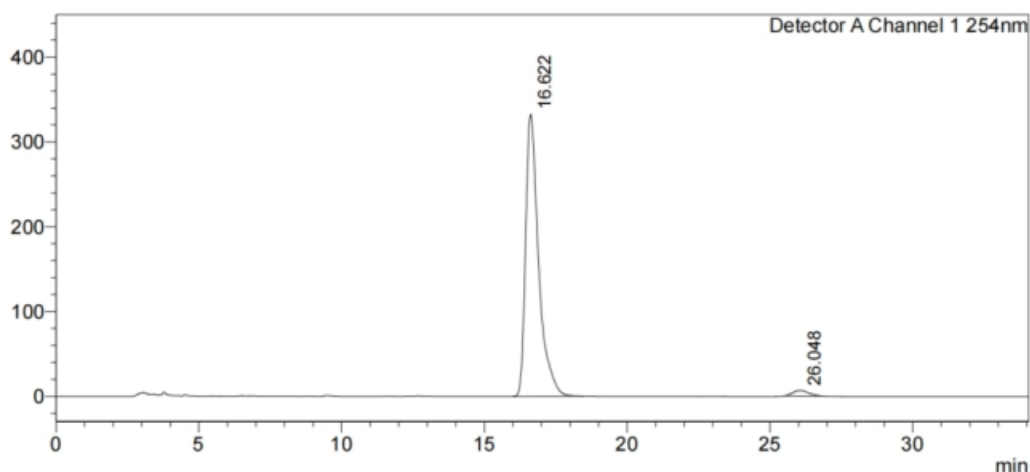

| Peak# | Ret. Time | Peak Start | Area     | Height | Area%   |
|-------|-----------|------------|----------|--------|---------|
| 1     | 16.622    | 16.008     | 10509619 | 332491 | 97.785  |
| 2     | 26.048    | 25.533     | 238104   | 6252   | 2.215   |
| Total |           |            | 10747723 | 338743 | 100.000 |

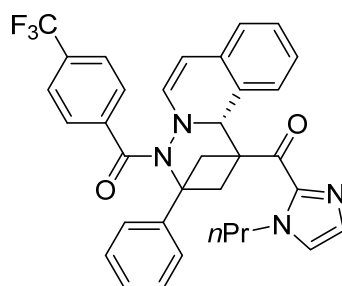**(R)-3aad**C<sub>34</sub>H<sub>29</sub>F<sub>3</sub>N<sub>4</sub>O<sub>2</sub>

M = 582.63 g/mol

**(R)**-(3-phenyl-1-(1-propyl-1*H*-imidazole-2-carbonyl)-1,2,3,11*b*-tetrahydro-4*H*-1,3-methano pyridazino[6,1-*a*]isoquinolin-4-yl)(4-(trifluoromethyl)phenyl)methanone (**(R)**-3aad) : Prepared from (3-phenylbicyclo[1.1.0]butan-1-yl)(1-propyl-1*H*-imidazol-2-yl)methanone (**1aa**, 53.3 mg, 0.20 mmol) and isoquinolin-2-ium-2-yl(4-(trifluoromethyl)benzoyl)amide (**2d**, 75.9 mg, 0.24 mmol) at room temperature for 16 h according to the **GP4**. Purification by flash chromatography on silica gel using petroleum ether/EtOAc (3/1) afforded (**R**)-**3aad** as a white solid (66.4 mg, 57% yield).

**(R)**-**3aad**: *R<sub>f</sub>* = 0.3 (petroleum ether/EtOAc = 3/1). Mp: 238-240 °C. HPLC analysis (Chiralpak AD-H, *i*PrOH/hexane = 15/85, 1.0 mL/min, 254 nm; tr (major) = 11.20 min,

tr (minor) = 15.84 min) gave the isomeric composition of the product: 88% ee.  $[\alpha]_D^{20} = -121.5$  ( $c = 1.00$ ,  $\text{CHCl}_3$ ).  **$^1\text{H NMR}$**  (400 MHz,  $\text{CDCl}_3$ ):  $\delta$  7.78 (d,  $J = 8.0$  Hz, 2H), 7.60 (d,  $J = 8.0$  Hz, 2H), 7.43 (d,  $J = 7.6$  Hz, 2H), 7.35 (t,  $J = 7.2$  Hz, 2H), 7.25-7.21 (m, 2H), 7.05 (s, 1H), 6.95 (t,  $J = 7.6$  Hz, 1H), 6.80 (dd,  $J = 11.2, 7.6$  Hz, 2H), 6.56 (d,  $J = 7.6$  Hz, 1H), 5.97 (d,  $J = 7.6$  Hz, 1H), 5.71 (s, 1H), 5.33 (d,  $J = 7.6$  Hz, 1H), 4.29-4.22 (m, 1H), 4.00-3.93 (m, 1H), 3.73 (dd,  $J = 11.2, 8.4$  Hz, 1H), 3.37-3.28 (m, 2H), 2.39 (d,  $J = 11.6$  Hz, 1H), 1.62-1.53 (m, 2H), 0.82 (t,  $J = 7.2$  Hz, 3H) ppm.  **$^{13}\text{C NMR}$**  (100 MHz,  $\text{CDCl}_3$ ):  $\delta$  190.3, 173.6, 142.0, 141.8, 140.4, 132.0 (q,  $J = 32.4$  Hz), 139.3, 129.8, 128.5, 128.4, 128.3, 128.2, 127.0, 126.7, 126.0, 125.3, 124.89, 124.86 (q,  $J = 3.6$  Hz), 124.8, 123.7 (q,  $J = 271.5$  Hz), 101.3, 69.1, 68.8, 59.0, 50.0, 48.6, 41.2, 23.8, 11.0 ppm.  **$^{19}\text{F NMR}$**  (376 MHz,  $\text{CDCl}_3$ ):  $\delta$  -62.86 ppm. **HRMS** (ESI)  $m/z$ :  $[\text{M}+\text{Na}]^+$  calcd. for  $\text{C}_{34}\text{H}_{29}\text{F}_3\text{N}_4\text{O}_2\text{Na}$ : 605.2135; found: 605.2137.

## &lt;Chromatogram&gt;

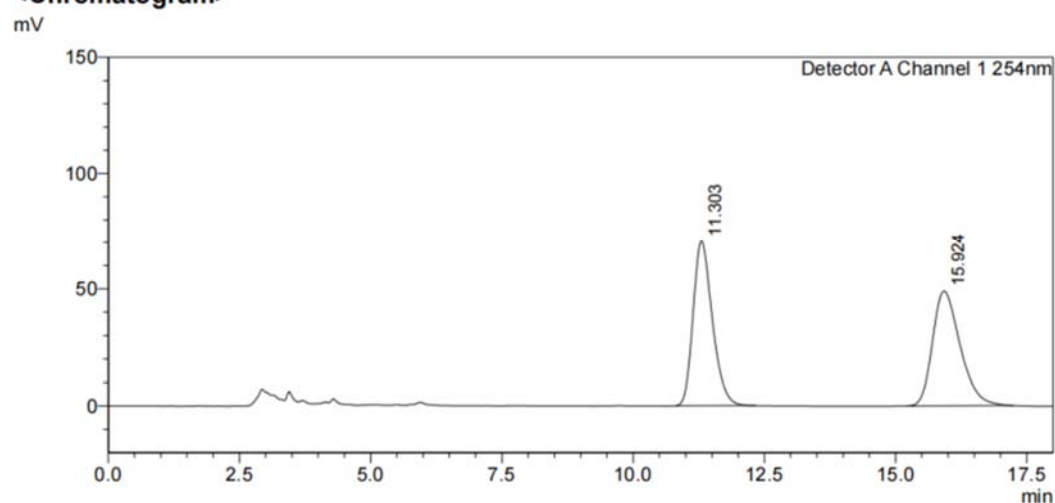

| Peak# | Ret. Time | Peak Start | Area    | Height | Area%   |
|-------|-----------|------------|---------|--------|---------|
| 1     | 11.303    | 10.817     | 1794359 | 70439  | 50.000  |
| 2     | 15.924    | 15.200     | 1794378 | 48957  | 50.000  |
| Total |           |            | 3588737 | 119397 | 100.000 |



## &lt;Chromatogram&gt;

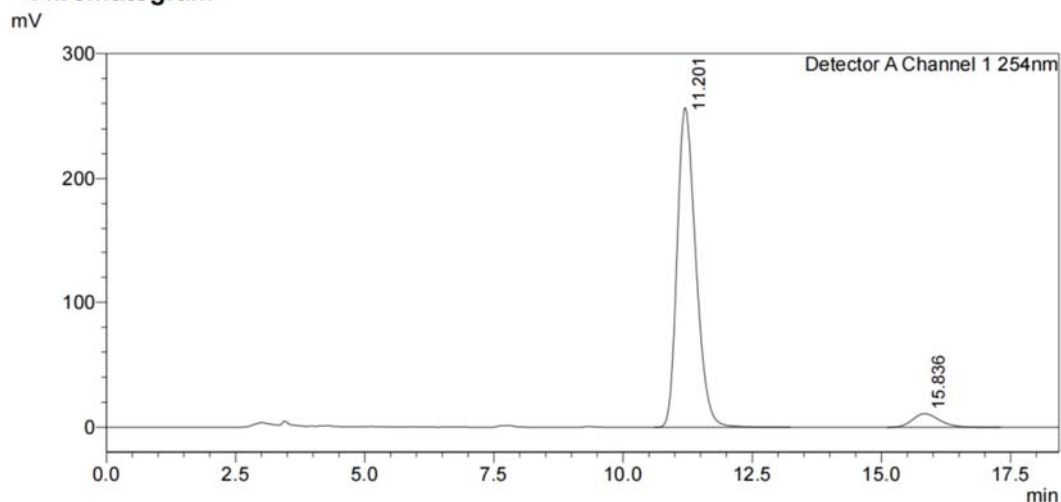

| Peak# | Ret. Time | Peak Start | Area    | Height | Area%   |
|-------|-----------|------------|---------|--------|---------|
| 1     | 11.201    | 10.608     | 6447487 | 256601 | 94.193  |
| 2     | 15.836    | 15.117     | 397492  | 10842  | 5.807   |
| Total |           |            | 6844979 | 267443 | 100.000 |

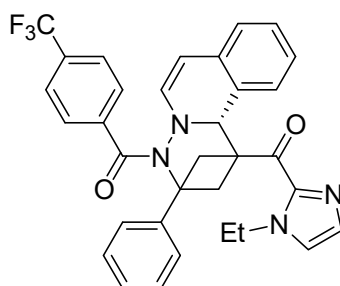**(R)-3ccd**C<sub>33</sub>H<sub>27</sub>F<sub>3</sub>N<sub>4</sub>O<sub>2</sub>

M = 568.60 g/mol

**(R)**-(1-ethyl-1*H*-imidazol-2-yl)(3-phenyl-4-(4-(trifluoromethyl)benzoyl)-3,4-dihydro-2*H*-1,3-methanopyridazino[6,1-*a*]isoquinolin-1(11*bH*)-yl)methanone (**(R)-3ccd**) : Prepared from (1-ethyl-1*H*-imidazol-2-yl)(3-phenylbicyclo[1.1.0]butan-1-yl)methanone (**1cc**, 50.5 mg, 0.20 mmol) and isoquinolin-2-ium-2-yl(4-(trifluoromethyl)benzoyl)amide (**2d**, 75.9 mg, 0.24 mmol) at room temperature for 16 h according to the **GP4**. Purification by flash chromatography on silica gel using petroleum ether/EtOAc (3/1) afforded **(R)-3ccd** as a white solid (51.4 mg, 45% yield).

**(R)-3ccd**: *R<sub>f</sub>* = 0.3 (petroleum ether/EtOAc = 3/1). Mp: 220-222 °C. HPLC analysis (Chiralpak AD-H, <sup>i</sup>PrOH/hexane = 15/85, 1.0 mL/min, 254 nm; tr (major) = 13.03 min,

tr (minor) = 21.45 min) gave the isomeric composition of the product: 84% ee.  $[\alpha]_{\text{D}}^{20} = -69.1$  ( $c = 1.00$ ,  $\text{CHCl}_3$ ).  **$^1\text{H NMR}$**  (400 MHz,  $\text{CDCl}_3$ ):  $\delta$  7.78 (d,  $J = 8.0$  Hz, 2H), 7.60 (d,  $J = 8.0$  Hz, 2H), 7.43 (d,  $J = 7.6$  Hz, 2H), 7.35 (d,  $J = 7.2$  Hz, 2H), 7.24-7.22 (m, 2H), 7.07 (s, 1H), 6.94 (d,  $J = 7.2$  Hz, 1H), 6.80 (dd,  $J = 12.0, 7.6$  Hz, 2H), 6.56 (t,  $J = 7.2$  Hz, 1H), 5.94 (d,  $J = 7.6$  Hz, 1H), 5.70 (s, 1H), 5.33 (d,  $J = 8.0$  Hz, 1H), 4.36-4.27 (m, 1H), 4.12-4.03 (m, 1H), 3.74 (dd,  $J = 11.2, 8.8$  Hz, 1H), 3.38-3.28 (m, 1H), 2.40 (d,  $J = 11.2, 2\text{H}$ ), 1.21 (t,  $J = 7.2$  Hz, 3H) ppm.  **$^{13}\text{C NMR}$**  (100 MHz,  $\text{CDCl}_3$ ):  $\delta$  190.3, 173.6, 142.0, 141.8, 140.5, 139.3, 132.1 (q,  $J = 32.5$  Hz), 131.0, 130.1, 128.5, 128.4, 128.3, 128.2, 127.0, 126.7, 125.3, 125.1, 124.90, 124.89 (q,  $J = 3.6$  Hz), 124.8, 123.7 (q,  $J = 270.6$  Hz), 101.3, 69.1, 68.9, 59.0, 48.6, 43.5, 41.2, 16.1.  **$^{19}\text{F NMR}$**  (376 MHz,  $\text{CDCl}_3$ ):  $\delta$  -62.87 ppm. **HRMS** (ESI)  $m/z$ :  $[\text{M}+\text{Na}]^+$  calcd. for  $\text{C}_{33}\text{H}_{27}\text{F}_3\text{N}_4\text{O}_2\text{Na}$ : 591.1978; found: 591.1982.

## &lt;Chromatogram&gt;

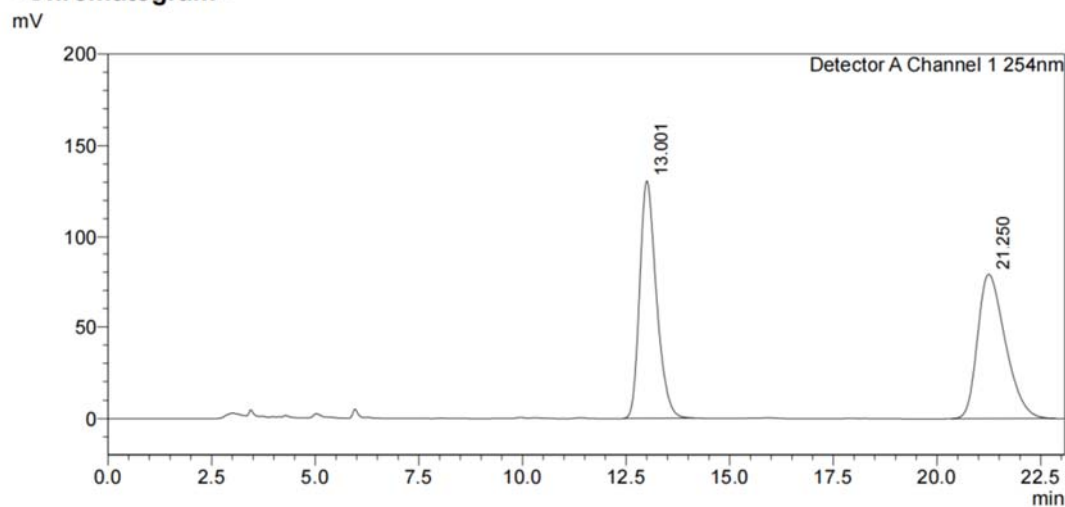

| Peak# | Ret. Time | Peak Start | Area    | Height | Area%   |
|-------|-----------|------------|---------|--------|---------|
| 1     | 13.001    | 12.442     | 3649910 | 130514 | 49.870  |
| 2     | 21.250    | 20.350     | 3668973 | 78883  | 50.130  |
| Total |           |            | 7318883 | 209397 | 100.000 |

## &lt;Chromatogram&gt;

mV

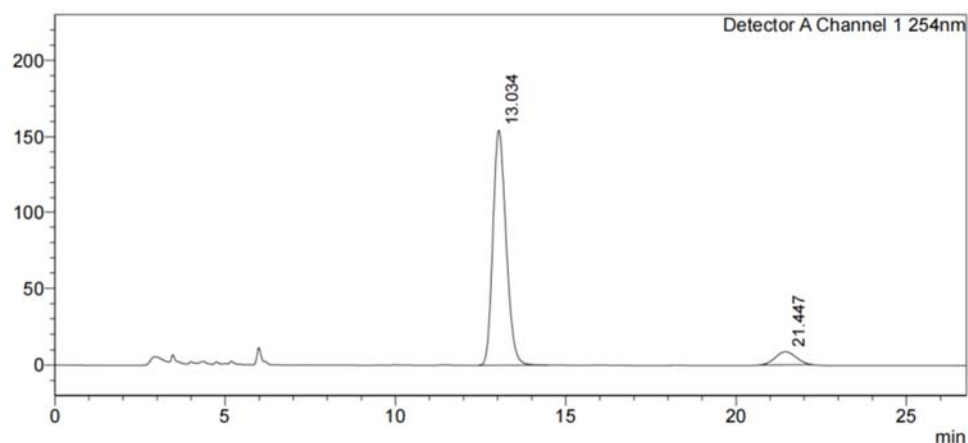

| Peak# | Ret. Time | Peak Start | Area    | Height | Area%   |
|-------|-----------|------------|---------|--------|---------|
| 1     | 13.034    | 12.450     | 4151647 | 154383 | 91.997  |
| 2     | 21.447    | 20.683     | 361149  | 8559   | 8.003   |
| Total |           |            | 4512796 | 162941 | 100.000 |

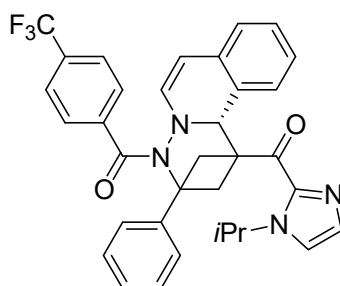**(R)-3ddd**C<sub>34</sub>H<sub>29</sub>F<sub>3</sub>N<sub>4</sub>O<sub>2</sub>

M = 582.63 g/mol

**(R)-(1-isopropyl-1H-imidazol-2-yl)(3-phenyl-4-(4-(trifluoromethyl)benzoyl)-3,4-dihydro-2H-1,3-methanopyridazino[6,1-a]isoquinolin-1(11bH)-yl)methanone ((R)-3ddd)** : Prepared from (1-isopropyl-1H-imidazol-2-yl)(3-phenylbicyclo[1.1.0]butan-1-yl)methanone (**1dd**, 53.3 mg, 0.20 mmol) and isoquinolin-2-ium-2-yl(4-(trifluoromethyl)benzoyl)amide (**2d**, 75.9 mg, 0.24 mmol) at room temperature for 16 h according to the **GP4**. Purification by flash chromatography on silica gel using petroleum ether/EtOAc (3/1) afforded (R)-**3ddd** as a white solid (25.5 mg, 22% yield).

**(R)-3ddd**:  $R_f$  = 0.3 (petroleum ether/EtOAc = 3/1). Mp: 210-212 °C. HPLC analysis (Chiralpak AD-H, *i*PrOH/hexane = 15/85, 1.0 mL/min, 254 nm; tr (major) = 8.70 min, tr

(minor) = 15.56 min) gave the isomeric composition of the product: 71% ee.  $[\alpha]_D^{20} = -90.0$  ( $c=0.80$ ,  $\text{CHCl}_3$ ).  **$^1\text{H NMR}$**  (400 MHz,  $\text{CDCl}_3$ ):  $\delta$  7.79 (d,  $J = 8.0$  Hz, 2H), 7.61 (d,  $J = 8.0$  Hz, 2H), 7.43 (d,  $J = 7.6$  Hz, 2H), 7.35 (t,  $J = 7.2$  Hz, 2H), 7.26-7.22 (m, 3H), 6.95 (t,  $J = 7.6$  Hz, 1H), 6.80 (dd,  $J = 12.0, 8.0$  Hz, 2H), 6.55 (t,  $J = 7.6$  Hz, 1H), 5.93 (d,  $J = 7.6$  Hz, 1H), 5.71 (s, 1H), 5.33 (d,  $J = 7.6$  Hz, 1H), 5.28-5.20 (m, 1H), 3.73 (dd,  $J = 10.4, 9.2$  Hz, 1H), 3.38-3.29 (m, 2H), 2.40 (d,  $J = 11.6$  Hz, 1H), 1.39 (d,  $J = 6.4$  Hz, 3H), 1.22 (d,  $J = 6.4$  Hz, 3H) ppm.  **$^{13}\text{C NMR}$**  (100 MHz,  $\text{CDCl}_3$ ):  $\delta$  190.7, 173.6, 141.8, 140.5, 139.3, 132.0 (q,  $J = 32.5$  Hz), 131.0, 130.4, 128.5, 128.4, 128.2, 127.0, 126.8, 125.3, 124.90 (q,  $J = 3.5$  Hz), 124.89, 124.8, 123.7 (q,  $J = 270.8$  Hz), 121.0, 101.3, 69.1, 68.9, 59.3, 49.0, 48.7, 41.2, 23.5, 23.1 ppm.  **$^{19}\text{F NMR}$**  (376 MHz,  $\text{CDCl}_3$ ):  $\delta$  -62.88 ppm. **HRMS** (ESI)  $m/z$ :  $[\text{M}+\text{Na}]^+$  calcd. for  $\text{C}_{34}\text{H}_{29}\text{F}_3\text{N}_4\text{O}_2\text{Na}$ : 605.2135; found: 605.2127.

## &lt;Chromatogram&gt;

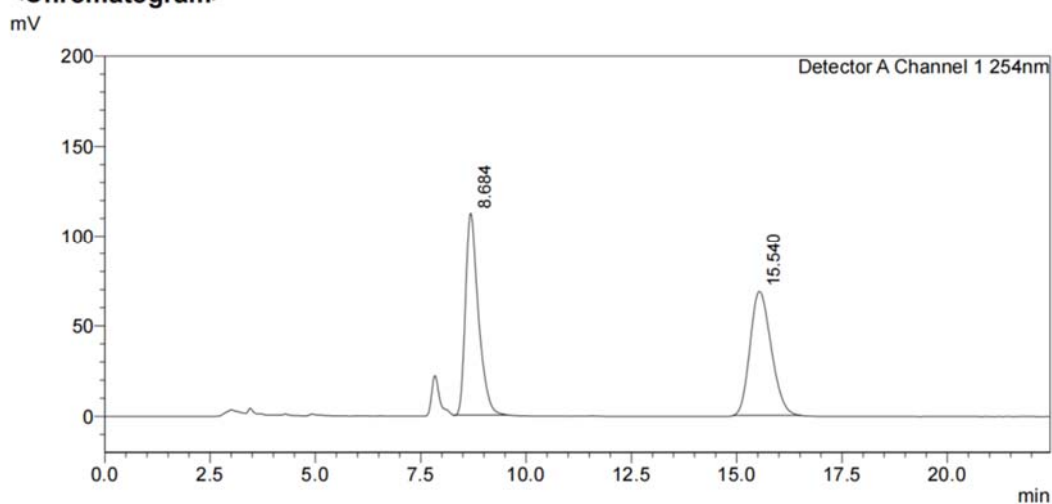

| Peak# | Ret. Time | Peak Start | Area    | Height | Area%   |
|-------|-----------|------------|---------|--------|---------|
| 1     | 8.684     | 8.267      | 2388719 | 112206 | 49.880  |
| 2     | 15.540    | 14.925     | 2400196 | 68502  | 50.120  |
| Total |           |            | 4788916 | 180708 | 100.000 |

## &lt;Chromatogram&gt;

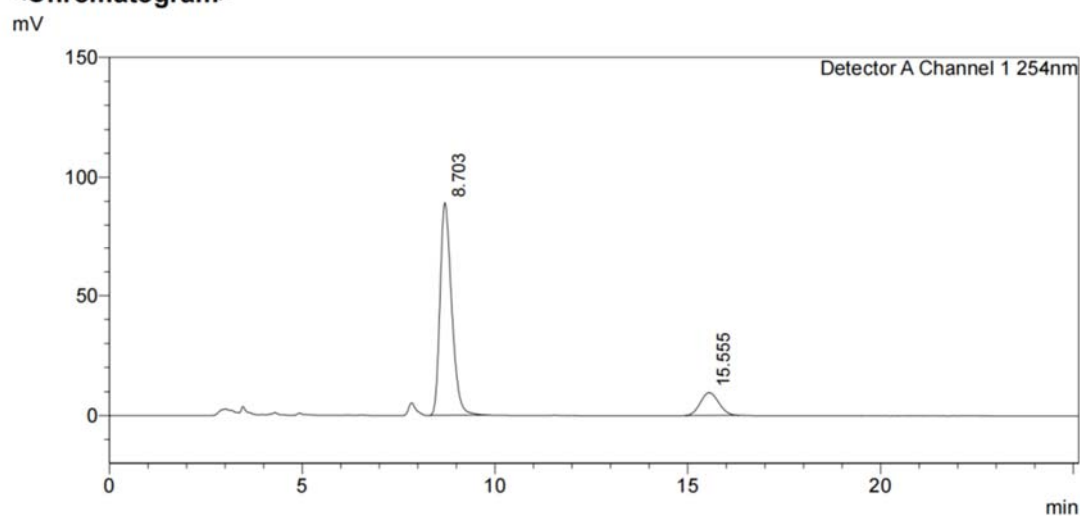

| Peak# | Ret. Time | Peak Start | Area    | Height | Area%   |
|-------|-----------|------------|---------|--------|---------|
| 1     | 8.703     | 8.308      | 1864704 | 89211  | 85.497  |
| 2     | 15.555    | 14.933     | 316315  | 9573   | 14.503  |
| Total |           |            | 2181019 | 98784  | 100.000 |

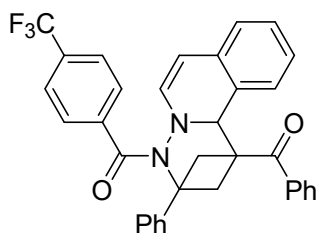**3gd**

$C_{34}H_{25}F_3N_2O_2$   
 M = 550.58 g/mol

(1-benzoyl-3-phenyl-1,2,3,11b-tetrahydro-4H-1,3-methanopyridazino[6,1-a]isoquinolin-4-yl)(4-(trifluoromethyl)phenyl)methanone (**3gd**): Prepared from (phenyl(3-phenylbicyclo[1.1.0]butan-1-yl)methanone (**1g**, 46.9 mg, 0.20 mmol) and isoquinolin-2-ium-2-yl(4-(trifluoromethyl)benzoyl)amide (**2d**, 75.9 mg, 0.24 mmol) at room temperature for 16 h according to the **GP4**. Purification by flash chromatography on silica gel using petroleum ether/EtOAc (10/1) afforded **3gd** as a yellow solid (8.0 mg, 8% yield).

**3gd**:  $R_f$  = 0.3 (petroleum ether/EtOAc = 10/1). Mp: 120-122 °C. HPLC analysis (Chiralpak OD-H,  $i$ PrOH/hexane = 10/90, 1.0 mL/min, 254 nm;  $t_r$  (major) = 11.34 min,

tr (minor) = 17.48 min) gave the isomeric composition of the product: 0% ee. **<sup>1</sup>H NMR** (400 MHz, CDCl<sub>3</sub>): δ 7.77 (d, *J* = 8.0 Hz, 2H), 7.63-7.58 (m, 4H), 7.42-7.32 (m, 5H), 7.27-7.21 (m, 3H), 6.92 (d, *J* = 7.6 Hz, 1H), 6.89-6.80 (m, 2H), 6.54 (t, *J* = 7.6 Hz, 1H), 6.47 (d, *J* = 7.6 Hz, 1H), 5.44-5.43 (m, 2H), 3.89 (t, *J* = 9.6 Hz, 1H), 3.29 (d, *J* = 10.4 Hz, 1H), 3.04 (t, *J* = 9.2 Hz, 1H), 2.59 (d, *J* = 11.2 Hz, 1H) ppm. **<sup>13</sup>C NMR** (100 MHz, CDCl<sub>3</sub>): δ 201.0, 174.0, 141.2, 140.4, 139.0, 135.9, 132.7, 132.3 (q, *J* = 32.5 Hz), 130.5, 128.8, 128.6, 128.3, 128.23, 128.2, 128.1, 127.8, 127.2, 126.1, 125.0 (q, *J* = 3.5 Hz), 124.8, 124.6, 123.7 (q, *J* = 271.1 Hz), 101.0, 69.8, 68.3, 58.2, 47.4, 43.4 ppm. **<sup>19</sup>F NMR** (376 MHz, CDCl<sub>3</sub>): δ -62.85 ppm. **HRMS** (ESI) *m/z*: [M+Na]<sup>+</sup> calcd. for C<sub>34</sub>H<sub>25</sub>F<sub>3</sub>N<sub>2</sub>O<sub>2</sub>Na: 573.1765; found: 573.1760.

## &lt;Chromatogram&gt;

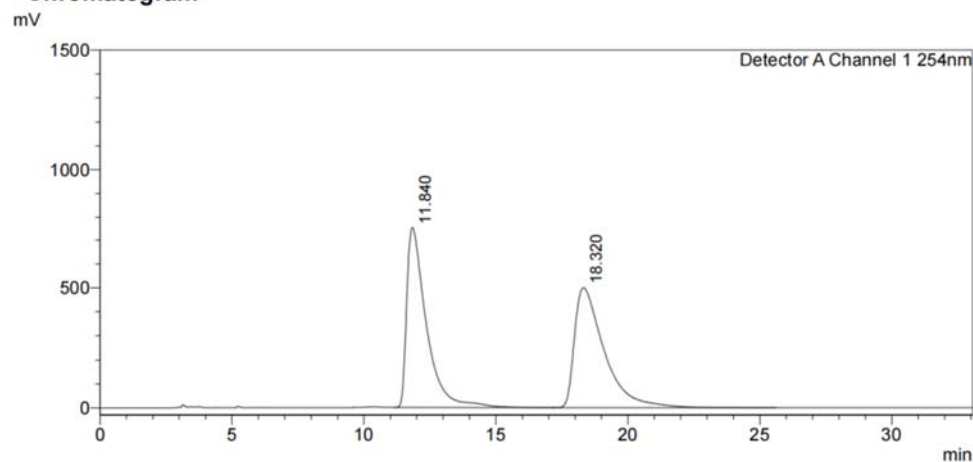

| Peak# | Ret. Time | Peak Start | Area     | Height  | Height% |
|-------|-----------|------------|----------|---------|---------|
| 1     | 11.840    | 11.125     | 38977237 | 751335  | 60.078  |
| 2     | 18.320    | 17.167     | 39149688 | 499266  | 39.922  |
| Total |           |            | 78126925 | 1250601 | 100.000 |

## &lt;Chromatogram&gt;

mV

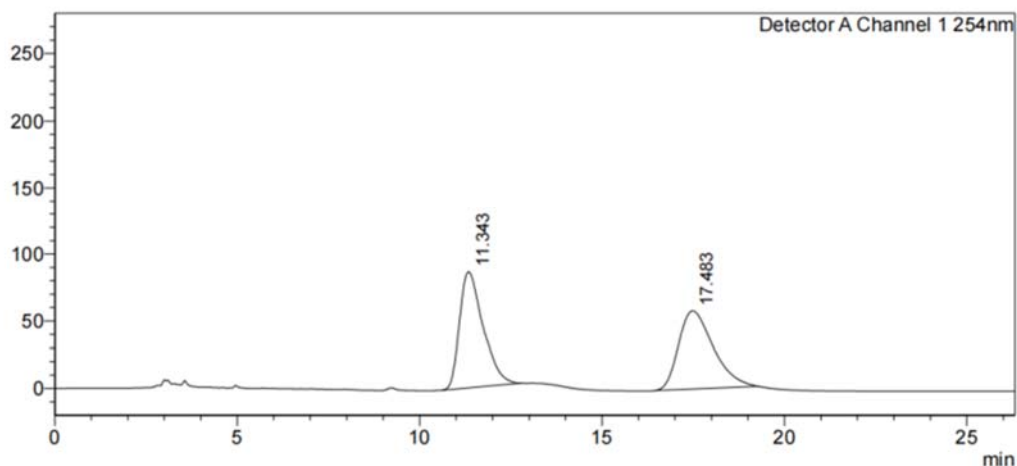

| Peak# | Ret. Time | Peak Start | Area    | Height | Area%   |
|-------|-----------|------------|---------|--------|---------|
| 1     | 11.343    | 10.608     | 3874538 | 86163  | 50.200  |
| 2     | 17.483    | 16.442     | 3843672 | 57937  | 49.800  |
| Total |           |            | 7718210 | 144100 | 100.000 |

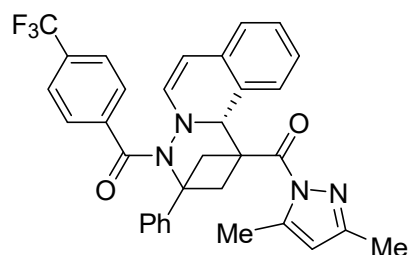**(R)-3ad**

$C_{33}H_{27}F_3N_4O_2$   
 M = 568.60 g/mol

**(R)**-(3,5-dimethyl-1H-pyrazol-1-yl)(3-phenyl-4-(4-(trifluoromethyl)benzoyl)-3,4-dihydro-2H-1,3-methanopyridazino[6,1-a]isoquinolin-1(11bH)-yl)methanone (**(R)-3ad**): (3,5-dimethyl-1H-pyrazol-1-yl)(3-phenylbicyclo[1.1.0]butan-1-yl)methanone (**1a**, 50.5 mg, 0.20 mmol) and isoquinolin-2-ium-2-yl(4-(trifluoromethyl)benzoyl)amide (**2d**, 75.9 mg, 0.24 mmol) at room temperature for 16 h according to the **GP4**. Purification by flash chromatography on silica gel using petroleum ether/EtOAc (10/1) afforded **(R)-3ad** as a white solid (31.8 mg, 28% yield).

**(R)-3ad**:  $R_f$  = 0.4 (petroleum ether/EtOAc = 10/1). Mp: 210-212 °C. HPLC analysis (Chiralpak AD-H,  $i$ PrOH/hexane = 10/90, 1.0 mL/min, 254 nm; tr (major) = 14.49 min,

tr (minor) = 10.00 min) gave the isomeric composition of the product: 6% ee.  $[\alpha]_D^{20} = -9.4$  ( $c = 1.00$ ,  $\text{CHCl}_3$ ).  **$^1\text{H NMR}$**  (400 MHz,  $\text{CDCl}_3$ ):  $\delta$  7.76 (d,  $J = 8.0$  Hz, 2H), 7.62 (d,  $J = 8.0$  Hz, 2H), 7.43 (d,  $J = 7.2$  Hz, 2H), 7.36 (t,  $J = 7.6$  Hz, 2H), 7.27-7.24 (m, 1H), 6.99 (t,  $J = 7.2$  Hz, 1H), 6.81 (d,  $J = 6.4$  Hz, 2H), 6.64 (t,  $J = 7.2$  Hz, 1H), 5.96 (s, 1H), 5.80 (s, 1H), 5.56 (s, 1H), 5.34 (d,  $J = 8.0$  Hz, 1H), 3.76 (t,  $J = 10.4$  Hz, 1H), 3.42 (d,  $J = 10.8$  Hz, 1H), 3.23 (t,  $J = 9.2$  Hz, 1H), 2.45 (d,  $J = 11.6$  Hz, 1H), 2.30 (s, 3H), 2.27 (s, 3H) ppm.  **$^{13}\text{C NMR}$**  (100 MHz,  $\text{CDCl}_3$ ):  $\delta$  173.8, 171.5, 152.9, 144.5, 141.5, 140.2, 139.2, 132.2 (q,  $J = 32.4$  Hz), 130.9, 128.7, 128.30, 128.28, 128.1, 127.1, 126.2, 125.7, 125.0 (q,  $J = 3.8$  Hz), 124.8, 124.6, 123.7 (q,  $J = 270.7$  Hz), 111.0, 101.4, 68.7, 68.3, 56.6, 48.7, 41.6, 13.9, 13.8.  **$^{19}\text{F NMR}$**  (376 MHz,  $\text{CDCl}_3$ ):  $\delta$  -62.89 ppm. **HRMS** (ESI)  $m/z$ :  $[\text{M}+\text{Na}]^+$  calcd. for  $\text{C}_{33}\text{H}_{27}\text{F}_3\text{N}_4\text{O}_2\text{Na}$ : 591.1978; found: 591.1976.

## &lt;Chromatogram&gt;

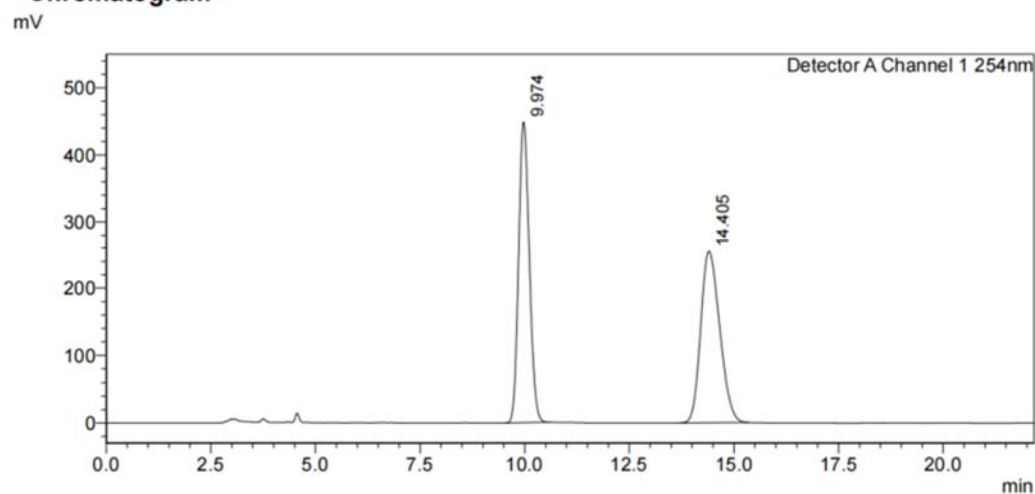

| Peak# | Ret. Time | Peak Start | Area     | Height | Area%   |
|-------|-----------|------------|----------|--------|---------|
| 1     | 9.974     | 9.508      | 7966208  | 448431 | 49.765  |
| 2     | 14.405    | 13.692     | 8041344  | 254766 | 50.235  |
| Total |           |            | 16007552 | 703197 | 100.000 |



## &lt;Chromatogram&gt;

mV

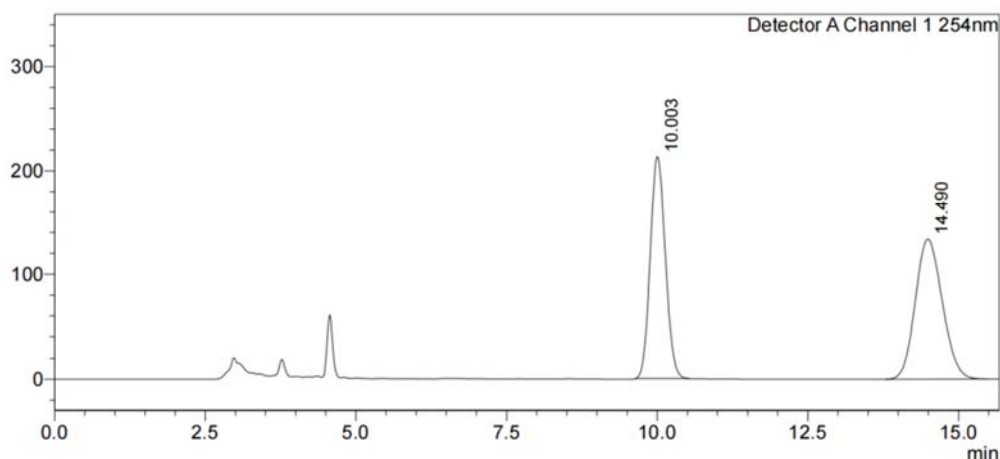

| Peak# | Ret. Time | Peak Start | Area    | Height | Area%   |
|-------|-----------|------------|---------|--------|---------|
| 1     | 10.003    | 9.642      | 3705739 | 212856 | 47.139  |
| 2     | 14.490    | 13.800     | 4155572 | 133598 | 52.861  |
| Total |           |            | 7861311 | 346454 | 100.000 |

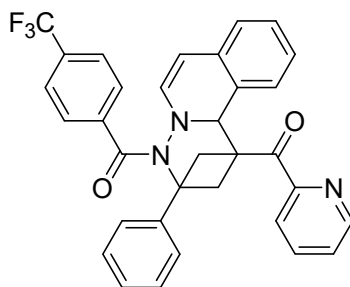**3od**C<sub>33</sub>H<sub>24</sub>F<sub>3</sub>N<sub>3</sub>O

M = 551.57 g/mol

(3-phenyl-1-picolinoyl-1,2,3,11b-tetrahydro-4H-1,3-methanopyridazino[6,1-a]isoquinolin-4-yl)(4-(trifluoromethyl)phenyl)methanone (**3od**) : Prepared from (3-phenylbicyclo[1.1.0]butan-1-yl)(pyridin-2-yl)methanone (**1o**, 47.1 mg, 0.2 mmol) and isoquinolin-2-ium-2-yl(4-(trifluoromethyl)benzoyl)amide (**2d**, 75.9 mg, 0.24 mmol) at room temperature for 16 h according to the **GP4**. Purification by flash chromatography on silica gel using petroleum ether/EtOAc (10/1) afforded **3od** as a yellow solid (97.2 mg, 88% yield)

**3od**: R<sub>f</sub> = 0.25 (petroleum ether/EtOAc = 3/1). Mp: 110-112 °C. HPLC analysis (Chiralpak AD-H, *i*PrOH/hexane = 15/85, 1.0 mL/min, 254 nm; tr (major) = 18.28 min,

tr (minor) = 22.88 min) gave the isomeric composition of the product: 0% ee. **<sup>1</sup>H NMR** (400 MHz, CDCl<sub>3</sub>): δ 8.71 (d, *J* = 4.0 Hz, 1H), 7.85-7.76 (m, 4H), 7.62 (d, *J* = 8.0 Hz, 2H), 7.45-7.40 (m, 3H), 7.34 (t, *J* = 7.2 Hz, 2H), 7.25-7.23 (m, 1H), 6.90 (t, *J* = 7.6 Hz, 1H), 6.83 (d, *J* = 8.0 Hz, 1H), 6.77 (d, *J* = 7.6 Hz, 1H), 6.50 (t, *J* = 7.6 Hz, 1H), 6.16 (d, *J* = 7.6 Hz, 1H), 5.84 (s, 1H), 5.35 (d, *J* = 7.6 Hz, 1H), 3.86-3.82 (m, 1H), 3.25-3.19 (m, 2H), 2.39 (d, *J* = 11.6 Hz, 1H) ppm. **<sup>13</sup>C NMR** (100 MHz, CDCl<sub>3</sub>): δ 200.0, 173.8, 153.1, 149.0, 141.7, 140.2, 139.3, 136.9, 132.1 (q, *J* = 32.4 Hz), 130.9, 128.5, 128.3, 127.01, 126.98, 126.9, 125.6, 125.0 (q, *J* = 3.7 Hz), 124.8, 124.8, 123.7 (q, *J* = 270.8 Hz), 122.9, 101.3, 69.1, 69.0, 58.9, 48.1, 42.0 ppm. **<sup>19</sup>F NMR** (376 MHz, CDCl<sub>3</sub>): δ -62.88 ppm. **HRMS** (ESI) *m/z*: [M+H]<sup>+</sup> calcd. for C<sub>33</sub>H<sub>25</sub>F<sub>3</sub>N<sub>3</sub>O: 552.1893; found: 552.1887.

**<Chromatogram>**

mV

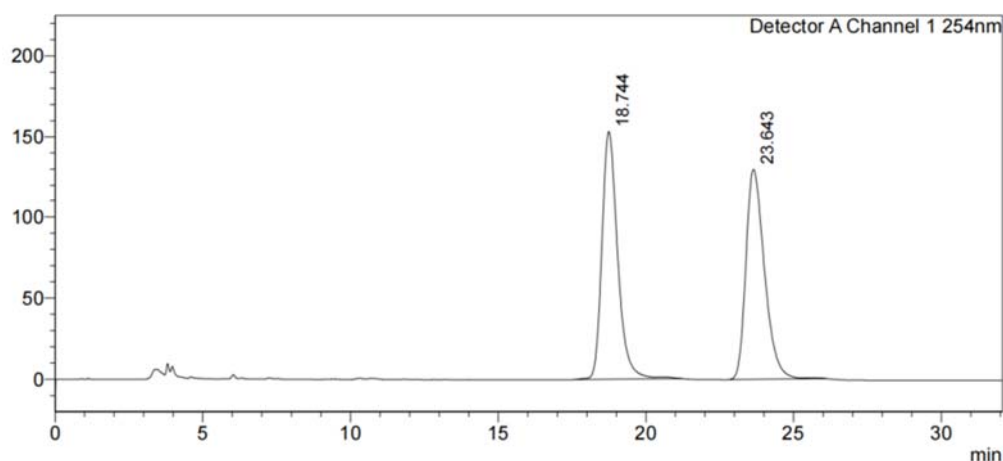

| Peak# | Ret. Time | Peak Start | Area     | Height | Area%   |
|-------|-----------|------------|----------|--------|---------|
| 1     | 18.744    | 17.542     | 5693996  | 153356 | 50.086  |
| 2     | 23.643    | 22.842     | 5674554  | 129957 | 49.914  |
| Total |           |            | 11368550 | 283312 | 100.000 |

## &lt;Chromatogram&gt;

mV

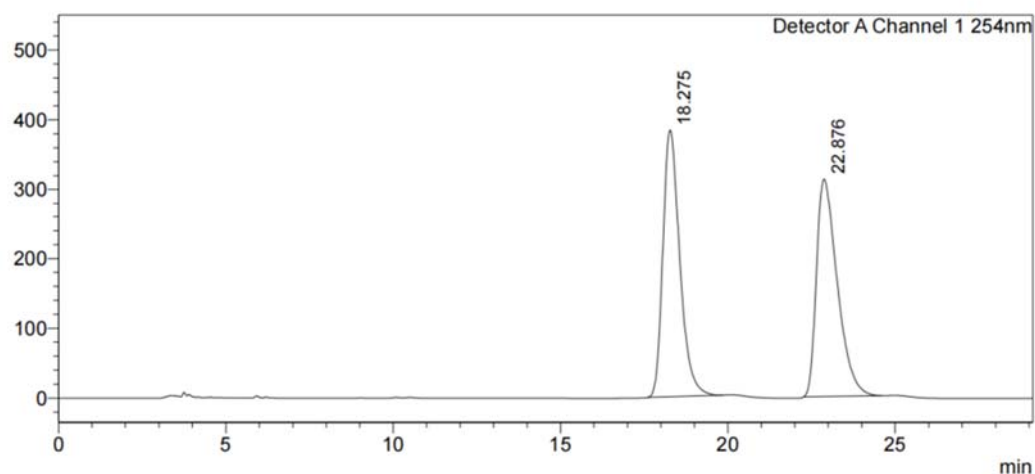

| Peak# | Ret. Time | Peak Start | Area     | Height | Area%   |
|-------|-----------|------------|----------|--------|---------|
| 1     | 18.275    | 17.608     | 13460154 | 383511 | 49.879  |
| 2     | 22.876    | 22.267     | 13525711 | 313019 | 50.121  |
| Total |           |            | 26985865 | 696530 | 100.000 |

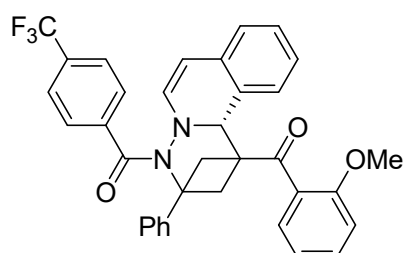**(R)-3bbd**

$C_{35}H_{27}F_3N_2O_3$   
 M = 580.61 g/mol

**(R)-1-(2-methoxybenzoyl)-3-phenyl-1,2,3,11b-tetrahydro-4H-1,3-methanopyridazino[6,1-a]**

**isoquinolin-4-yl(4-(trifluoromethyl)phenyl)methanone ((R)-3bbd)** : Prepared from (2-methoxyphenyl)(3-phenylbicyclo[1.1.0]butan-1-yl)methanone (**1bb**, 52.9 mg, 0.20 mmol) and isoquinolin-2-ium-2-yl(4-(trifluoromethyl)benzoyl)amide (**2b**, 75.9 mg, 0.24 mmol) at room temperature for 16 h according to the **GP4**. Purification by flash chromatography on silica gel using petroleum ether/EtOAc (10/1) afforded (R)-**3bbd** as a yellow solid (12.8 mg, 11% yield).

(R)-**3bbd**:  $R_f$  = 0.3 (petroleum ether/EtOAc = 5/1). Mp: 117-119 °C. HPLC analysis (Chiralpak AD-H,  $i$ PrOH/hexane = 15/85, 1.0 mL/min, 254 nm; tr (major) = 29.31 min,

tr (minor) = 20.68 min) gave the isomeric composition of the product: 4% ee.  $[\alpha]_D^{20} = -0.4$  ( $c = 0.75$ ,  $\text{CHCl}_3$ ).  **$^1\text{H NMR}$**  (400 MHz,  $\text{CDCl}_3$ ):  $\delta$  7.75 (d,  $J = 8.4$  Hz, 2H), 7.63 (d,  $J = 8.0$  Hz, 2H), 7.43-7.39 (m, 1H), 7.37-7.27 (m, 5H), 7.23-7.19 (m, 1H), 7.02-6.99 (m, 1H), 6.93-6.75 (m, 6H), 5.57 (s, 1H), 5.39 (d,  $J = 7.6$  Hz, 1H), 3.82 (s, 3H), 3.76-3.71 (m, 1H), 3.08 (d,  $J = 10.4$  Hz, 1H), 2.91 (t,  $J = 9.2$  Hz, 1H), 2.17 (d,  $J = 11.2$  Hz, 1H) ppm.  **$^{13}\text{C NMR}$**  (100 MHz,  $\text{CDCl}_3$ ):  $\delta$  203.3, 174.1, 157.3, 141.5, 140.0, 139.3, 133.7, 132.2 (q,  $J = 32.5$  Hz), 130.9, 130.7, 128.9, 128.4, 128.2, 128.1, 127.1, 127.0, 126.0, 125.0 (q,  $J = 3.9$  Hz), 124.8, 124.3, 123.7 (q,  $J = 270.3$  Hz), 120.9, 111.0, 68.7, 68.0, 59.2, 55.0, 46.2, 42.7 ppm.  **$^{19}\text{F NMR}$**  (376 MHz,  $\text{CDCl}_3$ ):  $\delta$  -62.89 ppm. **HRMS** (ESI)  $m/z$ :  $[\text{M}+\text{H}]^+$  calcd. for  $\text{C}_{35}\text{H}_{28}\text{F}_3\text{N}_2\text{O}_3$ : 581.2047; found: 581.2038.

## &lt;Chromatogram&gt;

mV

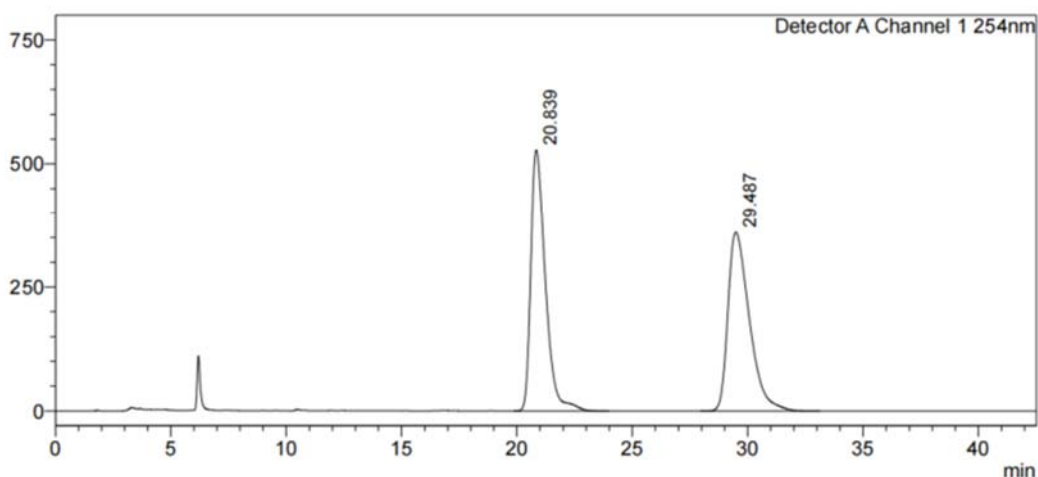

| Peak# | Ret. Time | Peak Start | Area     | Height | Area%   |
|-------|-----------|------------|----------|--------|---------|
| 1     | 20.839    | 19.867     | 23194874 | 528320 | 49.822  |
| 2     | 29.487    | 27.967     | 23360475 | 361191 | 50.178  |
| Total |           |            | 46555349 | 889511 | 100.000 |

## &lt;Chromatogram&gt;

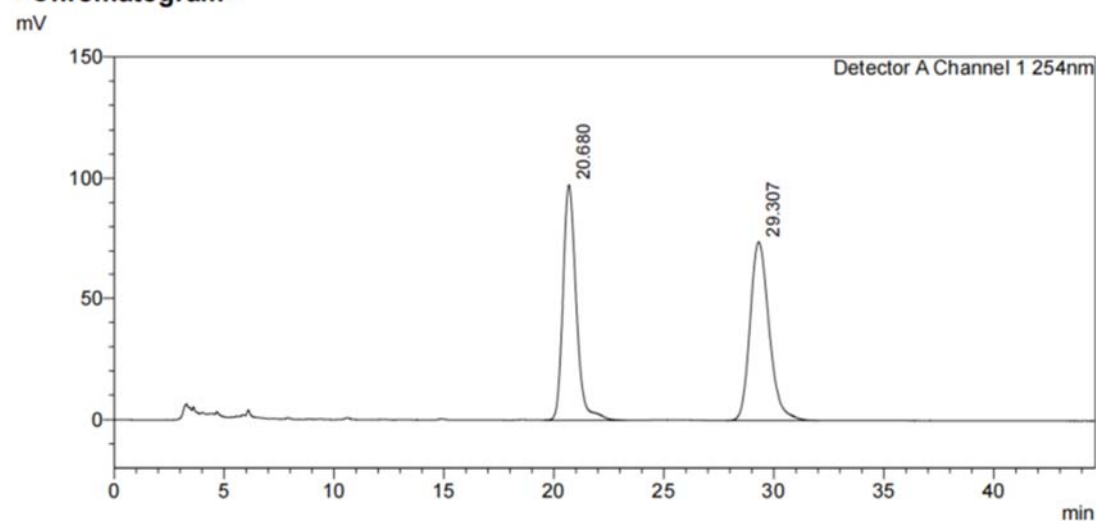

| Peak# | Ret. Time | Peak Start | Area    | Height | Area%   |
|-------|-----------|------------|---------|--------|---------|
| 1     | 20.680    | 19.608     | 4061854 | 97530  | 47.790  |
| 2     | 29.307    | 27.817     | 4437512 | 74085  | 52.210  |
| Total |           |            | 8499366 | 171615 | 100.000 |

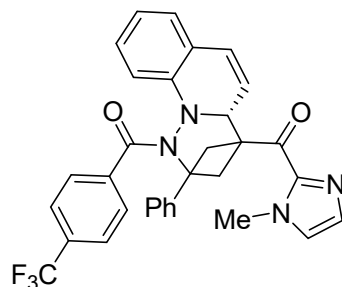**(R)-4qaa**

$C_{32}H_{25}F_3N_4O_2$   
 M = 554.57 g/mol

**(R)-(1-methyl-1H-imidazol-2-yl)(2-phenyl-1-(4-(trifluoromethyl)benzoyl)-2,3-dihydro-1H-2,4-methanopyridazino[1,6-a]quinolin-4(4aH)-yl)methanone ((R)-4qaa)**: Prepared from (1-methyl-1H-imidazol-2-yl)(3-phenylbicyclo[1.1.0]butan-1-yl)methanone (**1q**, 47.7 mg, 0.20 mmol) and quinolin-1-ium-1-yl(4-(trifluoromethyl)benzoyl)amide (**2aa** 75.9 mg, 0.24 mmol) according to the **GP4** at rt for 16 h. Purification by flash chromatography on silica gel using petroleum ether/EtOAc (3/1) afforded **(R)-4qaa** as a yellow solid (55.4 mg, 50% yield).

**(R)-4qaa:**  $R_f = 0.3$  (petroleum ether/EtOAc = 3/1). Mp: 271-273 °C. HPLC analysis (Chiralpak AD-H, *i*PrOH/hexane = 15/85, 1.0 mL/min, 254 nm; tr (major) = 14.27 min, tr (minor) = 20.26 min) gave the isomeric composition of the product: 41% ee.  $[\alpha]_D^{20} = -49.8$  ( $c = 1.00$ , CHCl<sub>3</sub>). **<sup>1</sup>H NMR** (400 MHz, CDCl<sub>3</sub>):  $\delta$  7.86 (d,  $J = 8.0$  Hz, 2H), 7.54 (d,  $J = 8.0$  Hz, 2H), 7.45 (d,  $J = 7.6$  Hz, 2H), 7.37 (t,  $J = 7.6$  Hz, 2H), 7.33-7.23 (m, 3H), 7.17 (s, 1H), 7.03 (s, 1H), 6.88 (d,  $J = 7.2$  Hz, 1H), 6.80 (t,  $J = 7.2$  Hz, 1H), 6.21 (d,  $J = 10.0$  Hz, 1H), 5.71 (d,  $J = 4.4$  Hz, 1H), 5.08 (dd,  $J = 10.0, 4.4$  Hz, 1H), 3.98 (s, 3H), 3.22-3.11 (m, 2H), 2.90 (dd,  $J = 11.6, 8.8$  Hz, 1H), 2.38 (d,  $J = 11.2$  Hz, 1H) ppm. **<sup>13</sup>C NMR** (100 MHz, CDCl<sub>3</sub>):  $\delta$  189.7, 174.6, 146.1, 141.9, 141.5, 138.8, 132.1 (q,  $J = 32.3$  Hz), 130.01, 129.98, 128.1, 128.0, 127.6, 127.0, 126.0, 124.8 (q,  $J = 3.8$  Hz), 123.8 (q,  $J = 270.9$  Hz), 120.9, 120.5, 119.8, 111.5, 68.5, 66.3, 59.8, 48.5, 38.2, 35.8 ppm. **<sup>19</sup>F NMR** (376 MHz, CDCl<sub>3</sub>)  $\delta$  -62.90 ppm. **HRMS** (ESI)  $m/z$ :  $[M+Na]^+$  calcd. for C<sub>32</sub>H<sub>25</sub>F<sub>3</sub>N<sub>4</sub>O<sub>2</sub>Na: 577.1822; found: 577.1813.

## &lt;Chromatogram&gt;

mV

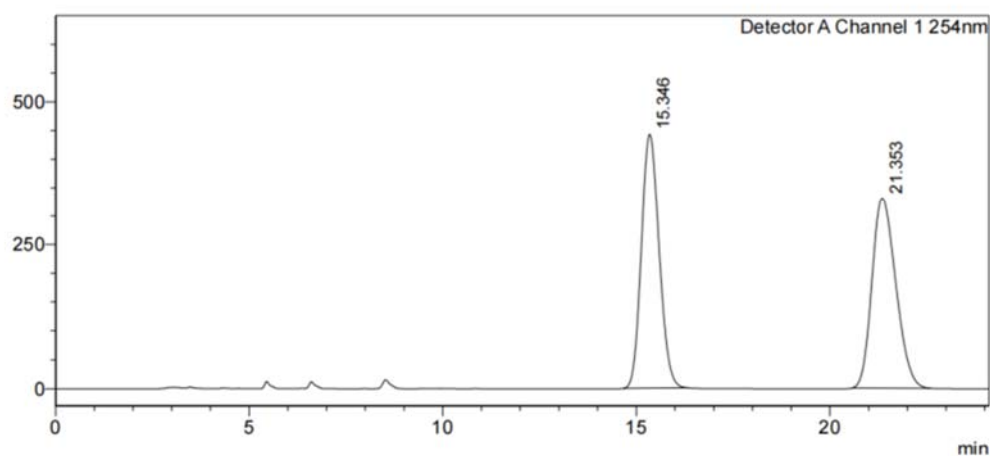

| Peak# | Ret. Time | Peak Start | Area     | Height | Area%   |
|-------|-----------|------------|----------|--------|---------|
| 1     | 15.346    | 14.675     | 14116863 | 442282 | 49.963  |
| 2     | 21.353    | 20.567     | 14137848 | 330806 | 50.037  |
| Total |           |            | 28254711 | 773088 | 100.000 |

**<Chromatogram>**

mV

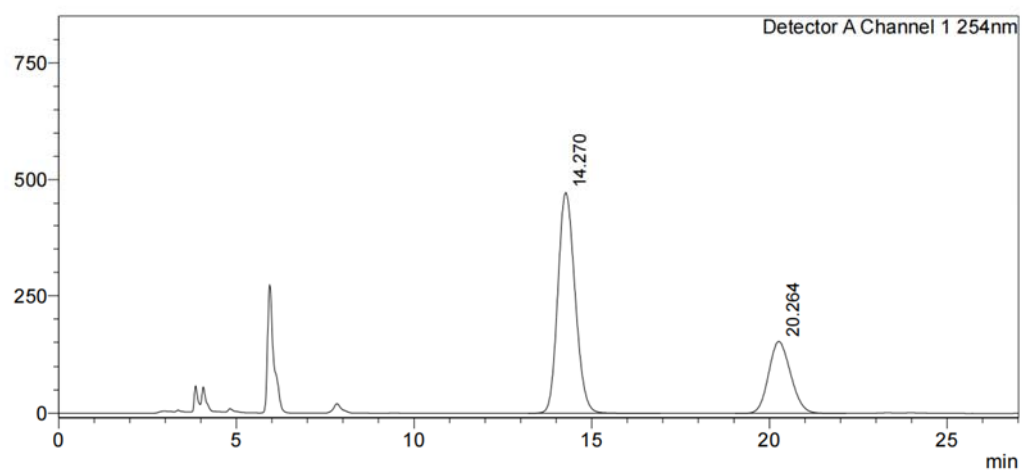

| Peak# | Ret. Time | Peak Start | Area     | Height | Area%   |
|-------|-----------|------------|----------|--------|---------|
| 1     | 14.270    | 13.217     | 15904508 | 472676 | 70.643  |
| 2     | 20.264    | 19.042     | 6609565  | 152424 | 29.357  |
| Total |           |            | 22514073 | 625100 | 100.000 |

## 12 NMR Spectra

**H, <sup>13</sup>C and <sup>19</sup>F NMR Spectra for Compound 1u:**<sup>1</sup>H NMR (400 MHz, CDCl<sub>3</sub>)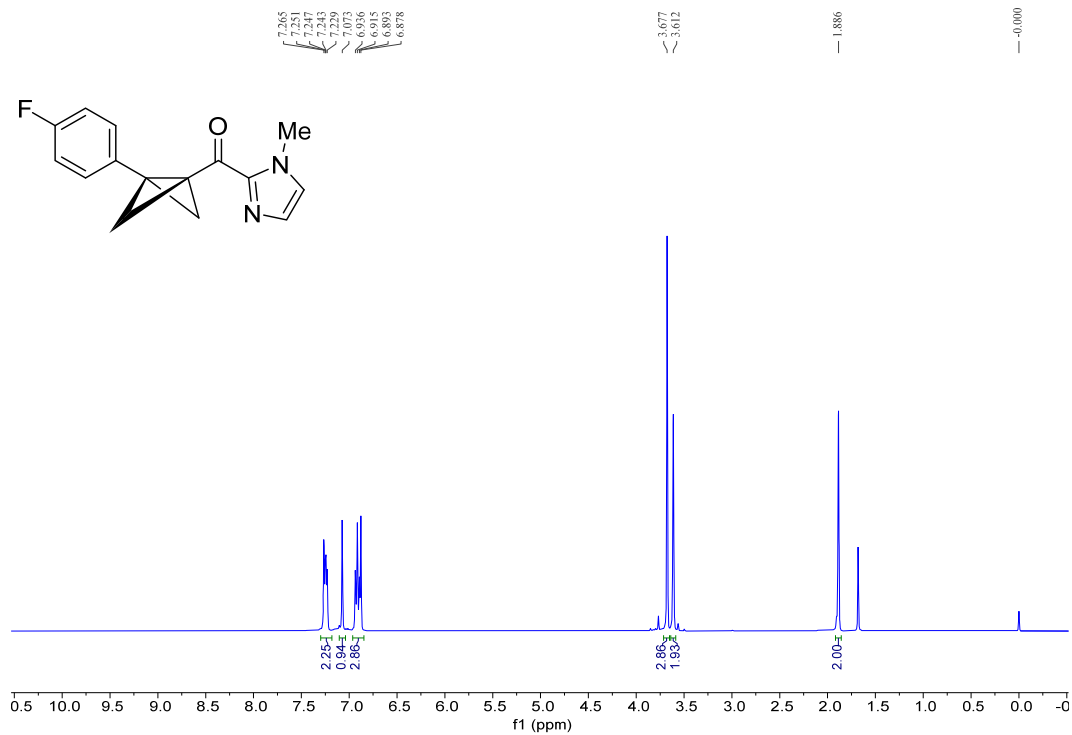<sup>13</sup>C NMR (100 MHz, CDCl<sub>3</sub>)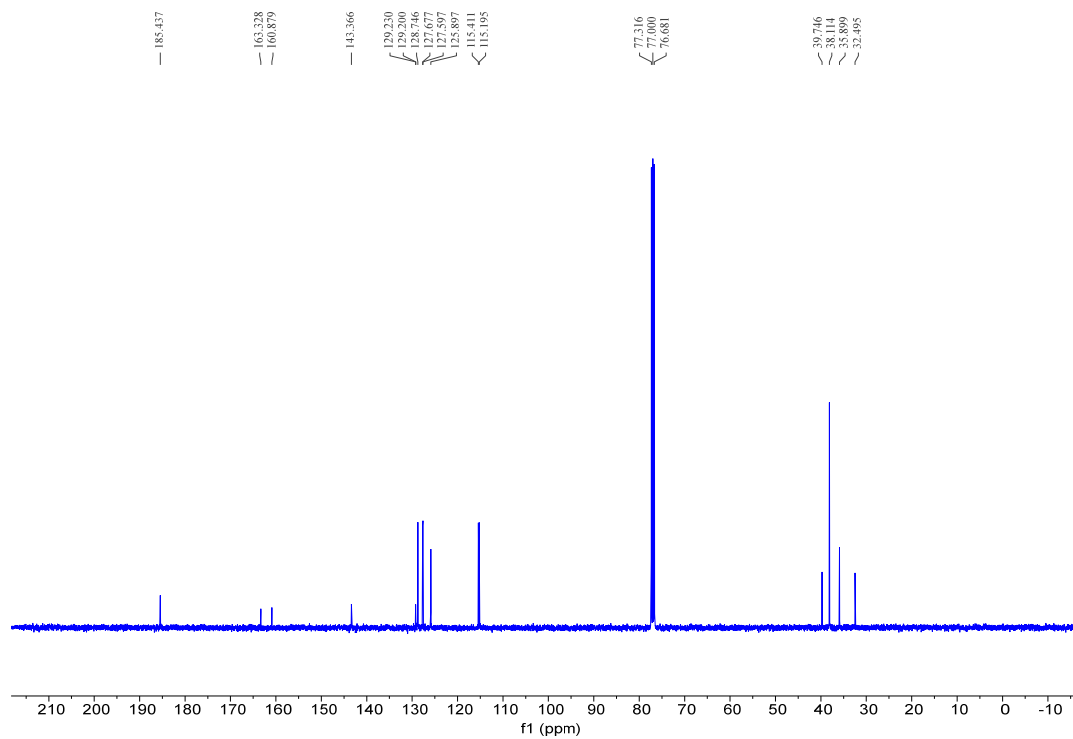



$^{19}\text{F}$  NMR (376 MHz,  $\text{CDCl}_3$ )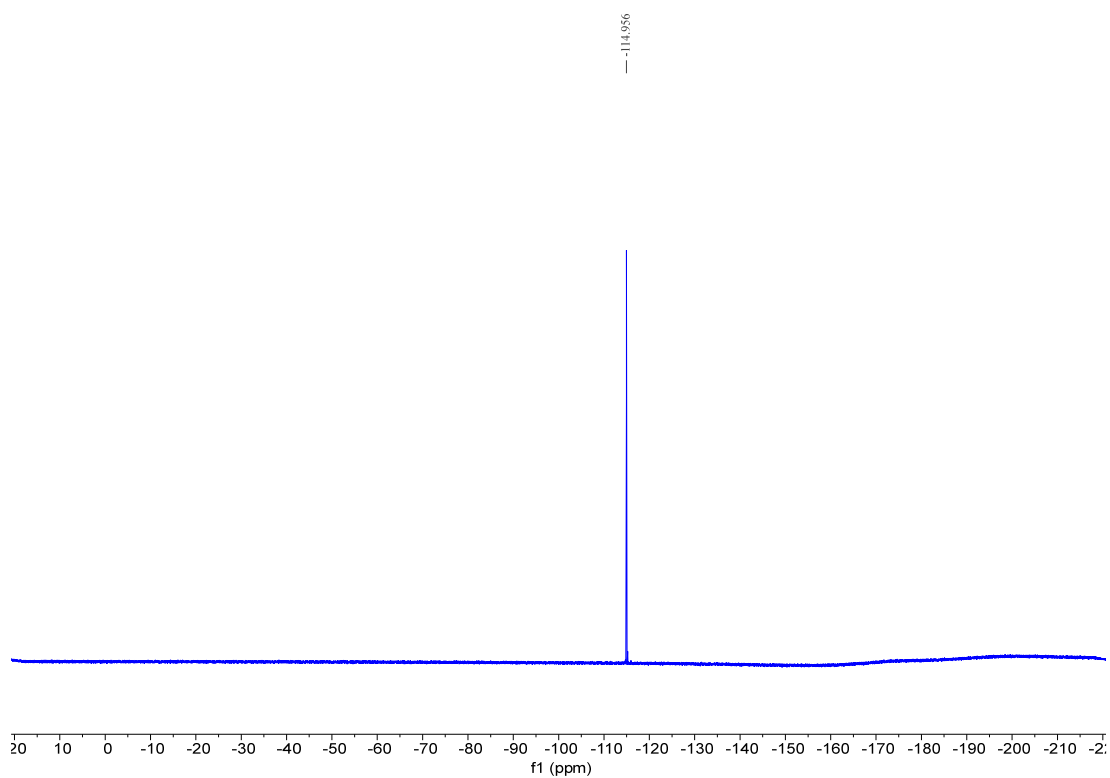 $^1\text{H}$ ,  $^{13}\text{C}$  and  $^{19}\text{F}$  NMR Spectra for Compound 1v: $^1\text{H}$  NMR (400 MHz,  $\text{CDCl}_3$ )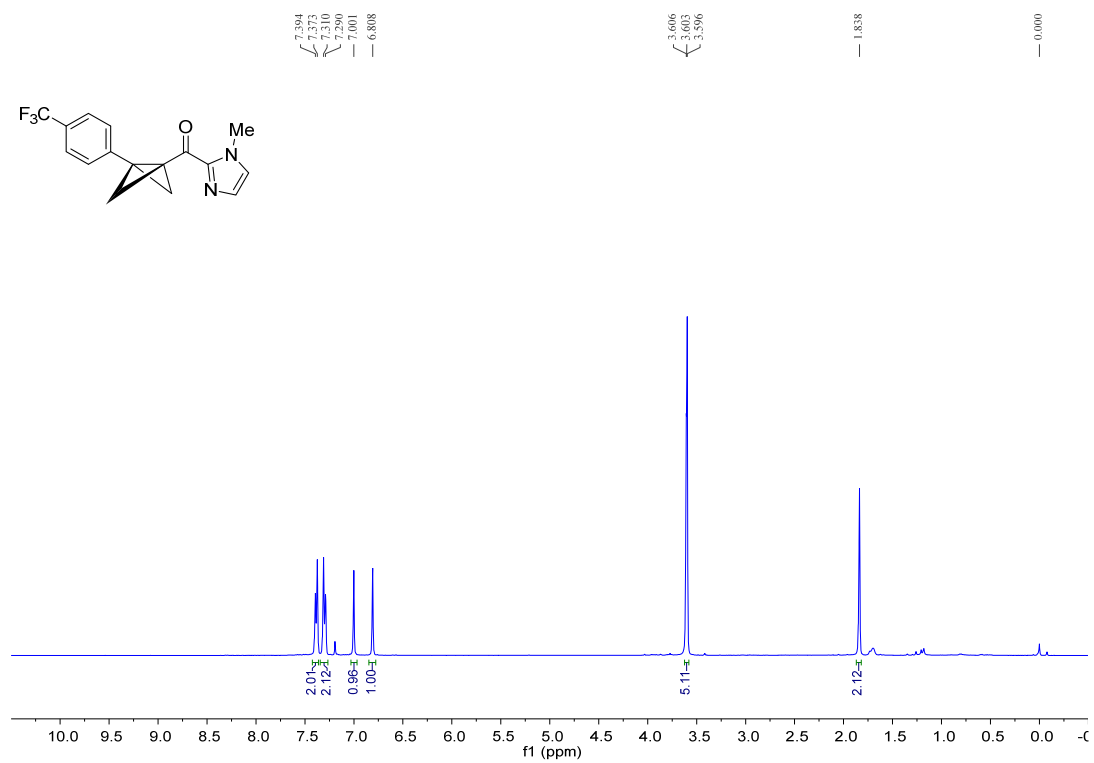

$^{13}\text{C}$  NMR (100 MHz,  $\text{CDCl}_3$ )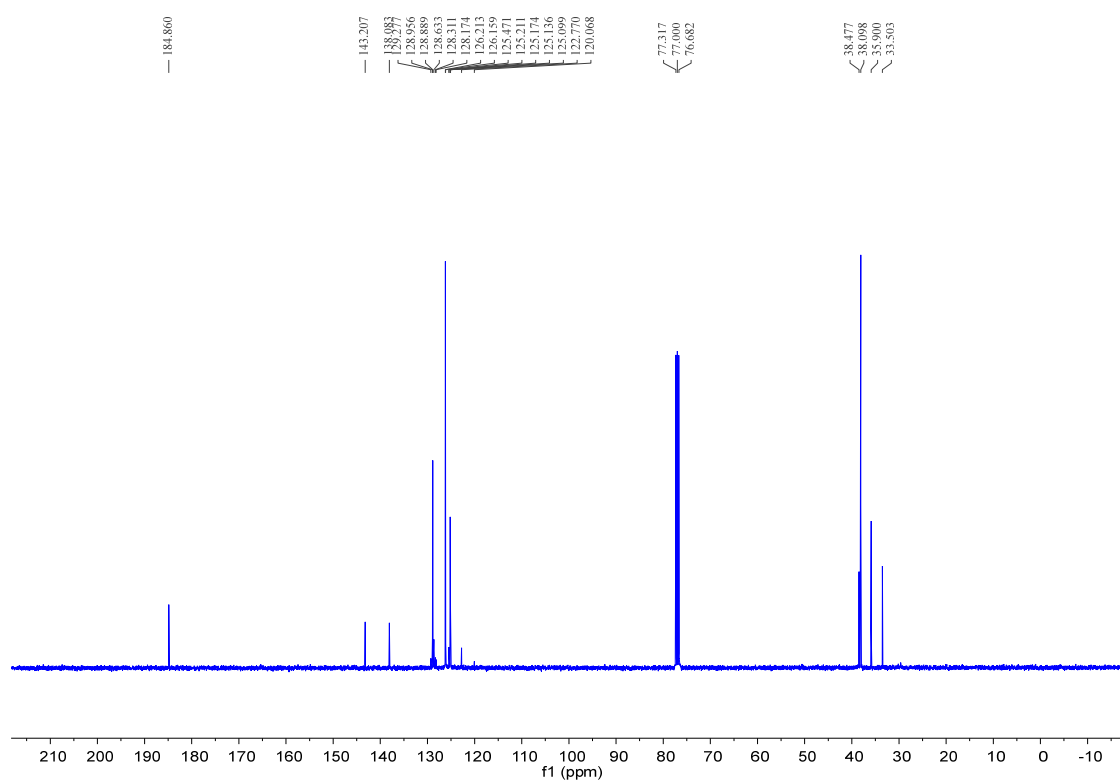 $^{19}\text{F}$  NMR (376 MHz,  $\text{CDCl}_3$ )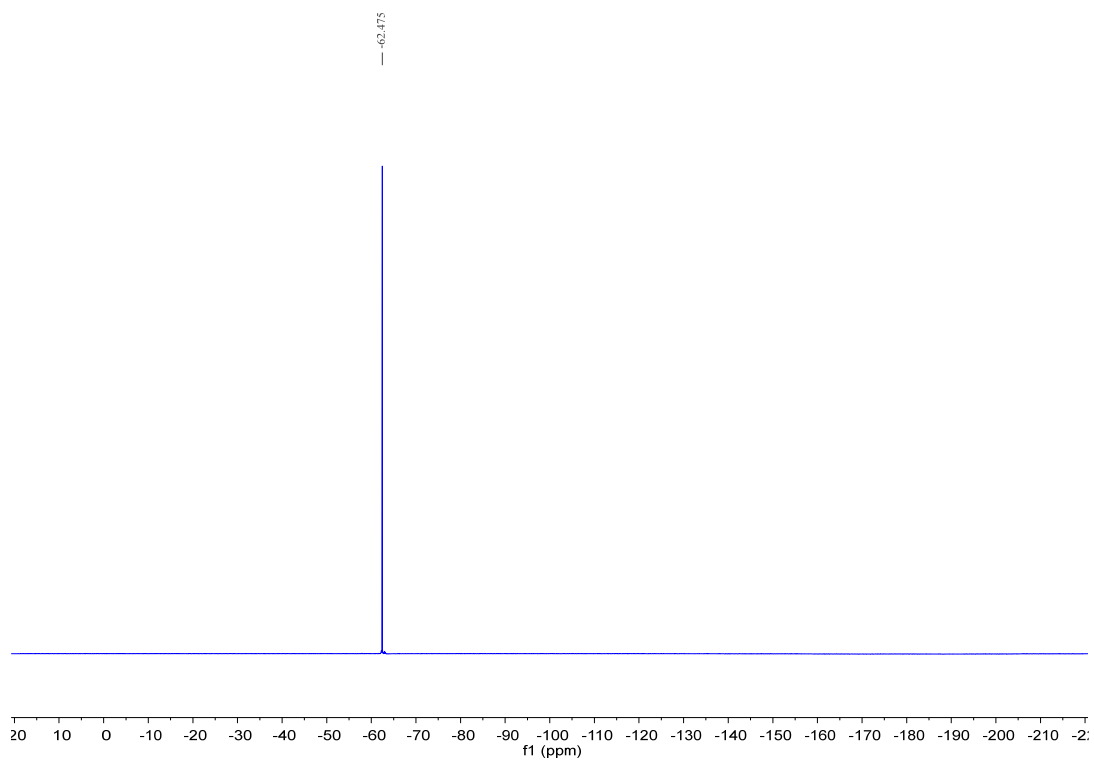

**$^1\text{H}$  and  $^{13}\text{C}$  NMR Spectra for Compound 1y:** $^1\text{H}$  NMR (600 MHz,  $\text{CDCl}_3$ )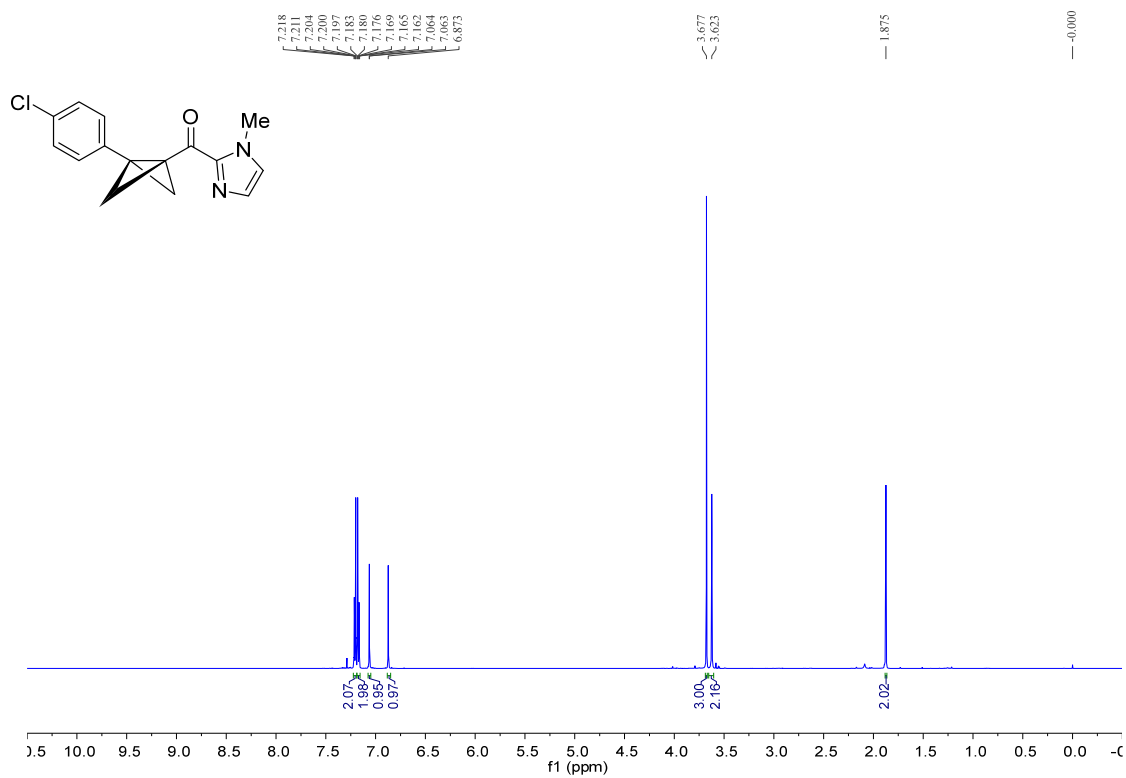 $^{13}\text{C}$  NMR (150 MHz,  $\text{CDCl}_3$ )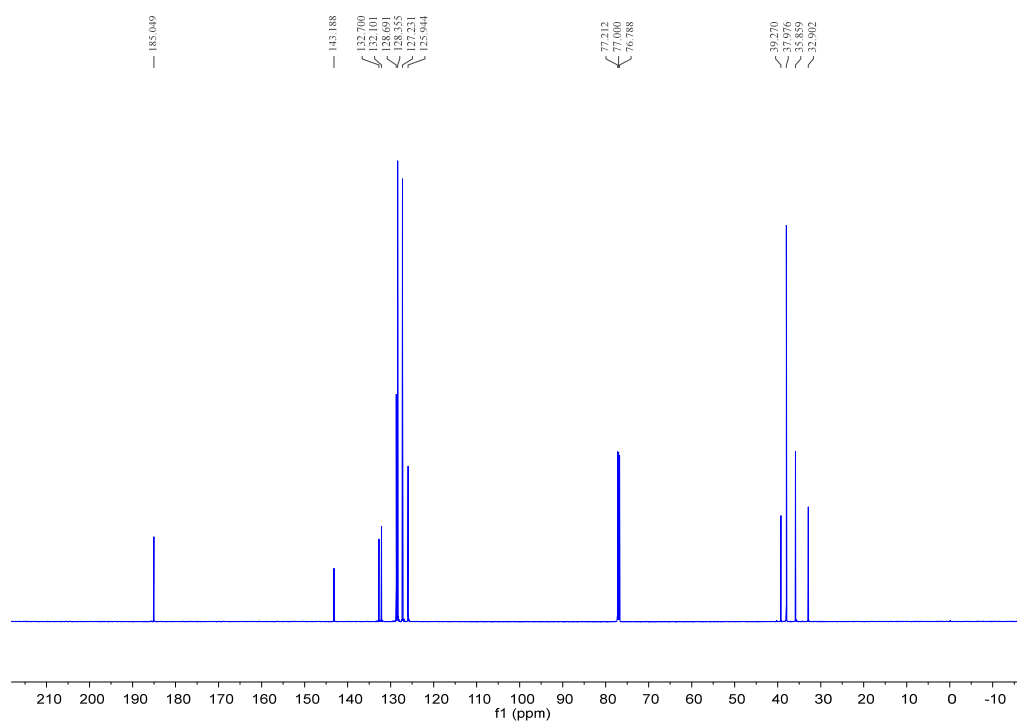

**$^1\text{H}$  and  $^{13}\text{C}$  NMR Spectra for Compound 1bb** $^1\text{H}$  NMR (400 MHz,  $\text{CDCl}_3$ )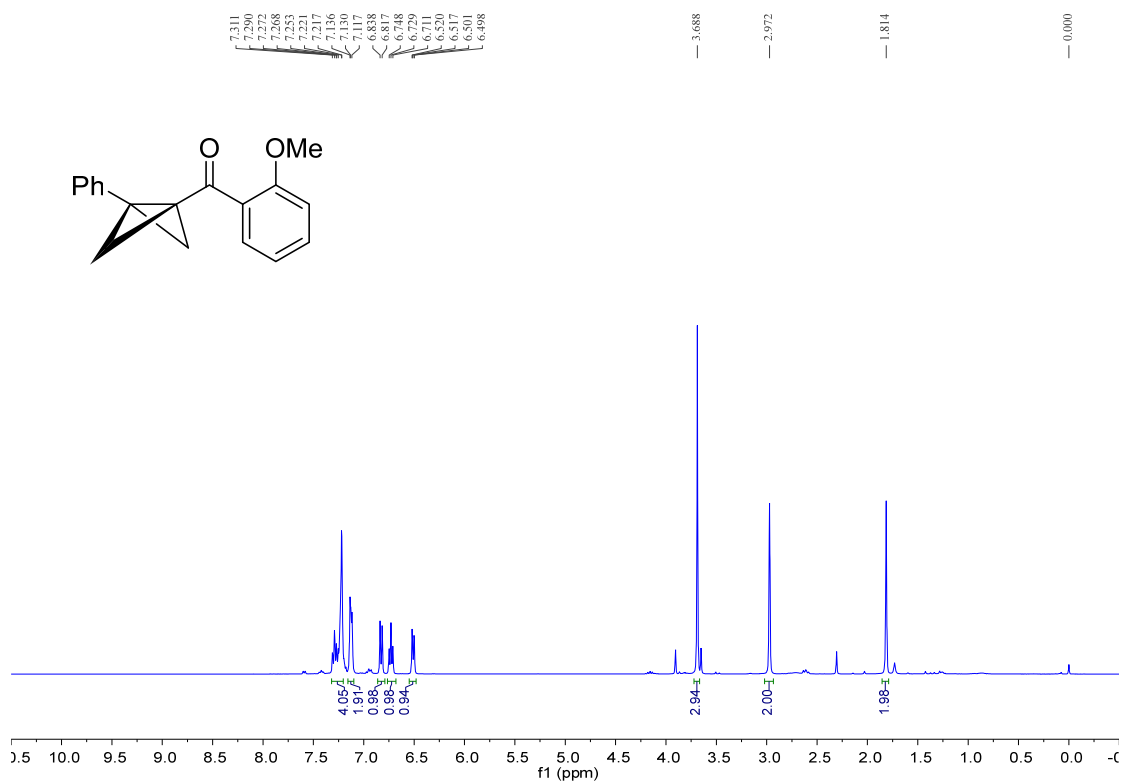 $^{13}\text{C}$  NMR (100 MHz,  $\text{CDCl}_3$ )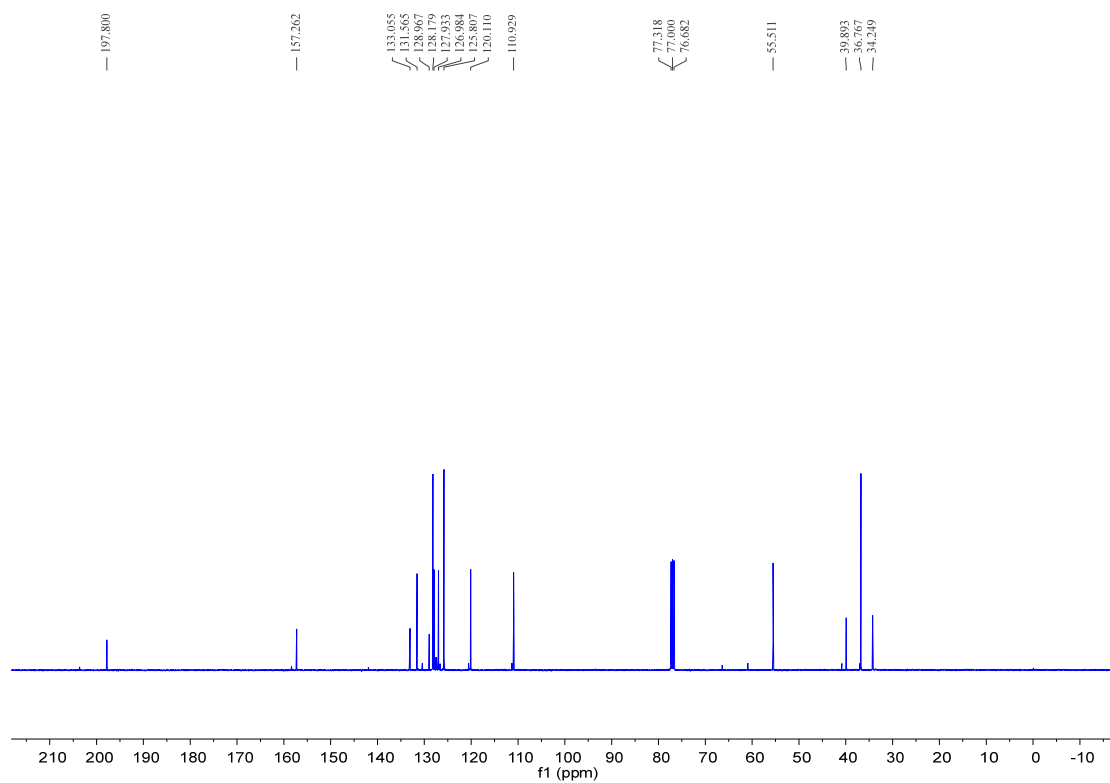

**<sup>1</sup>H and <sup>13</sup>C NMR Spectra for Compound 3aa:****<sup>1</sup>H NMR (400 MHz, CDCl<sub>3</sub>)**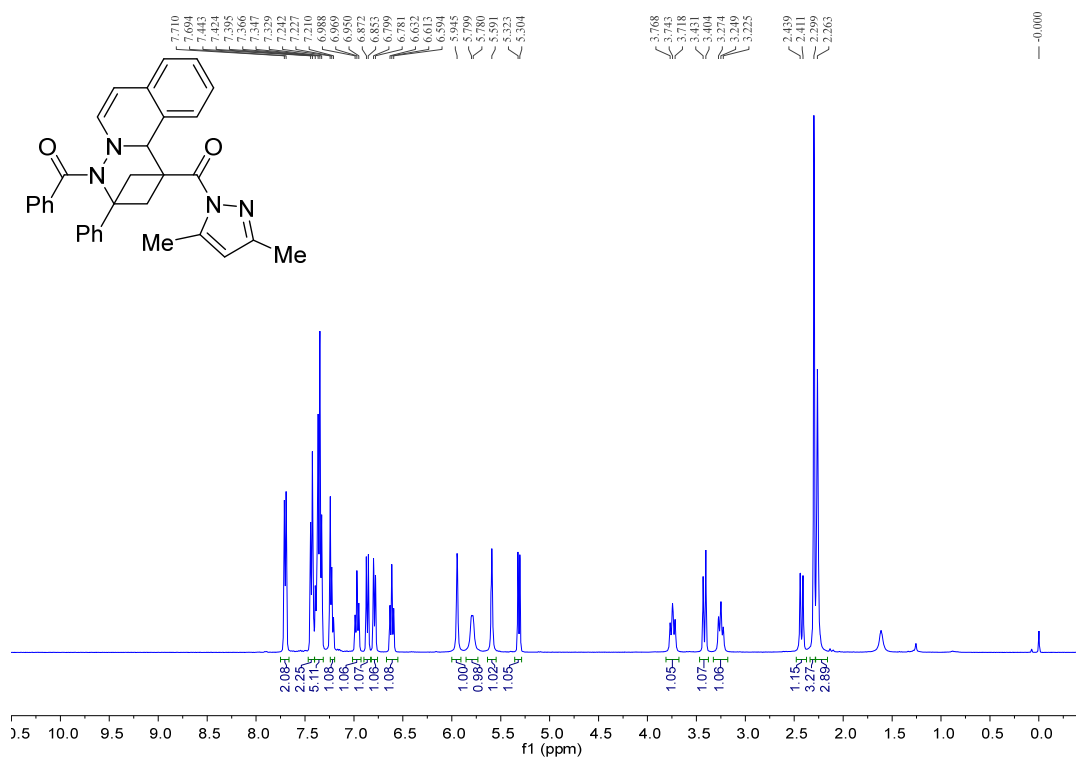**<sup>13</sup>C NMR (100 MHz, CDCl<sub>3</sub>)**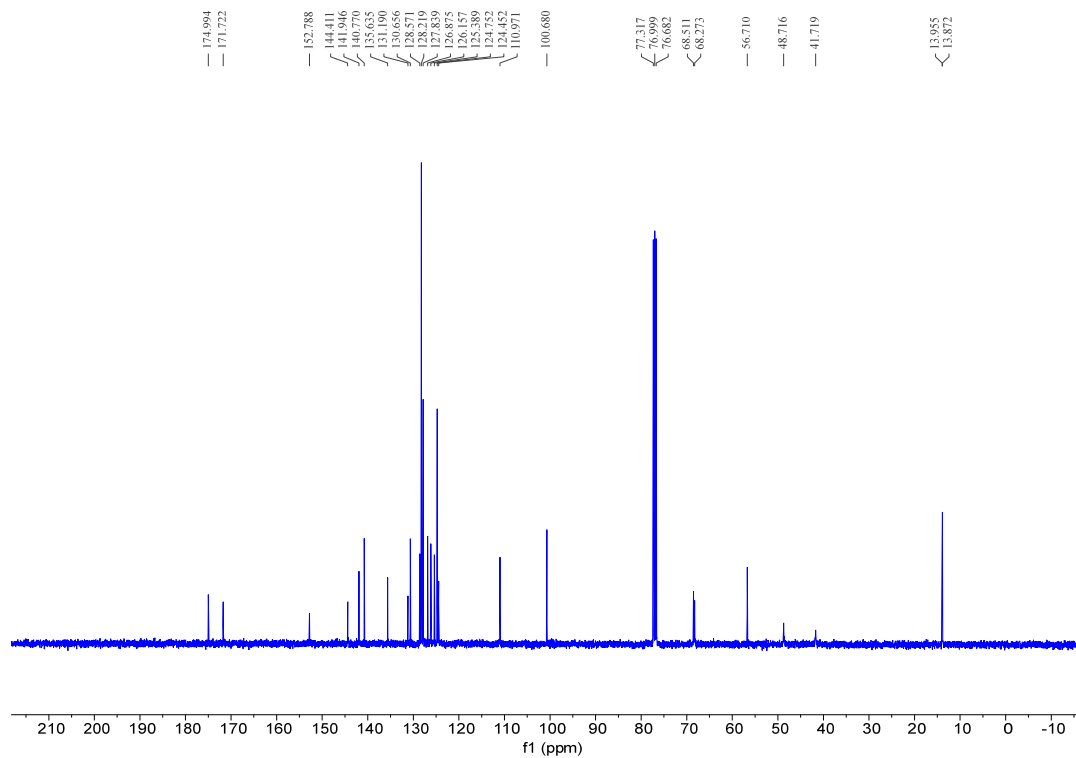

**<sup>1</sup>H and <sup>13</sup>C NMR Spectra for Compound 3ba:****<sup>1</sup>H NMR (400 MHz, CDCl<sub>3</sub>)**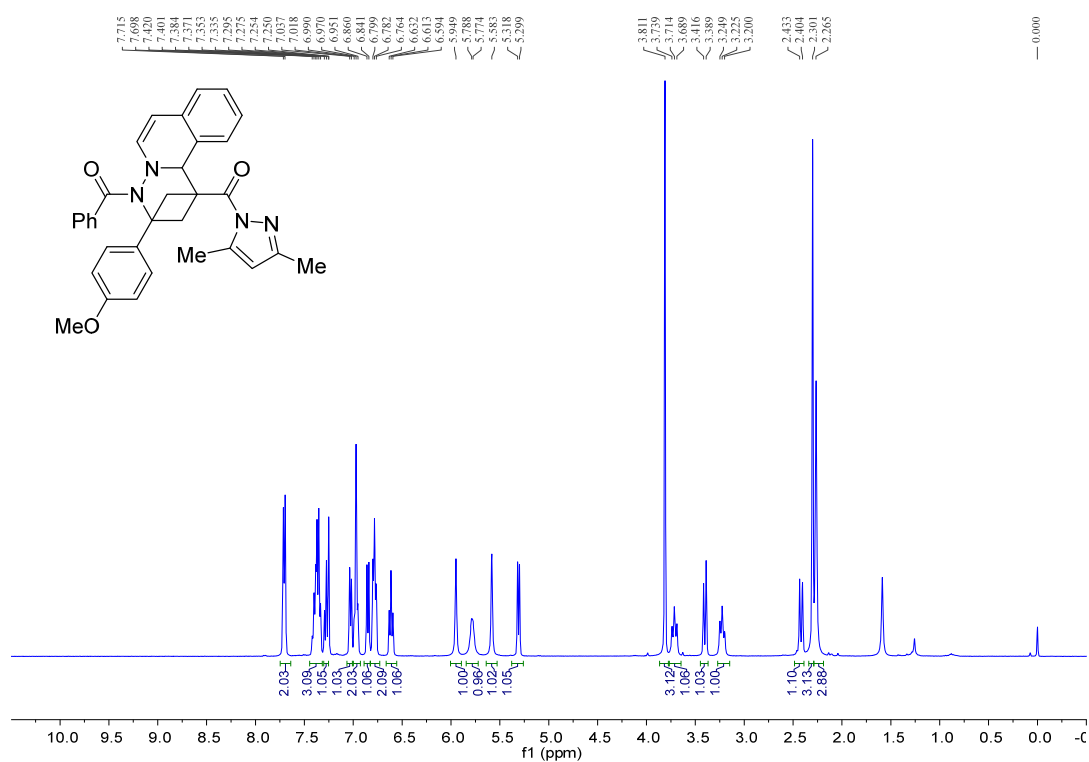**<sup>13</sup>C NMR (100 MHz, CDCl<sub>3</sub>)**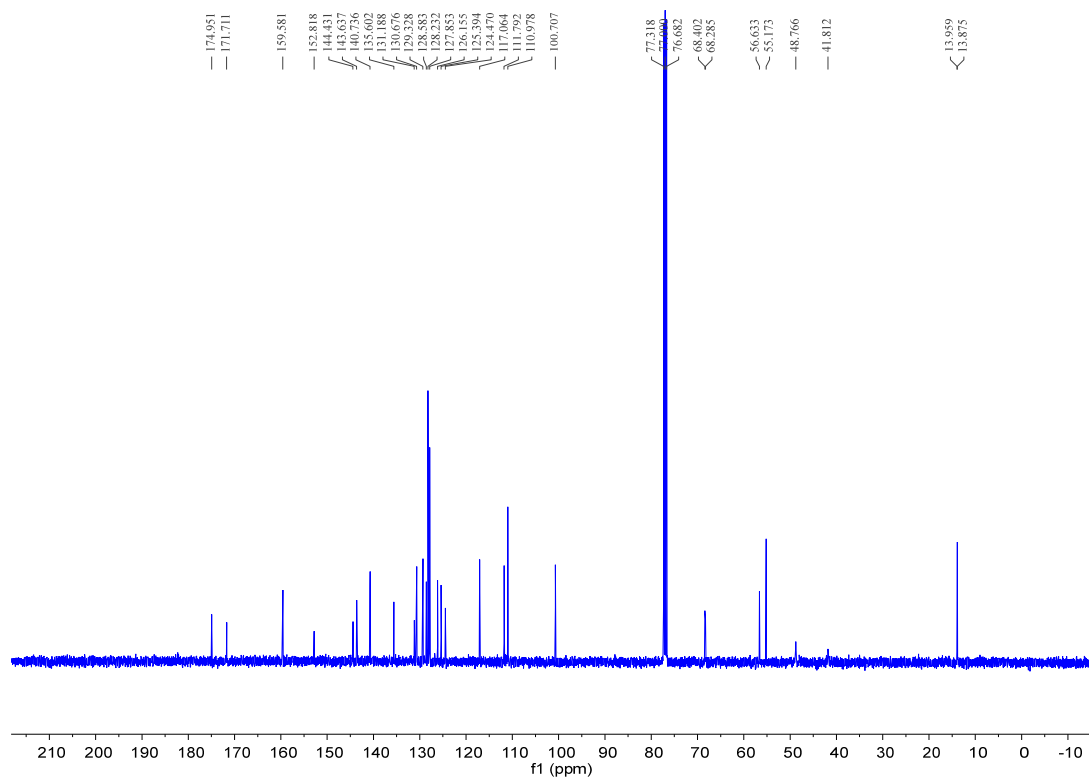

**$^1\text{H}$ ,  $^{13}\text{C}$  and  $^{19}\text{F}$  NMR Spectra for Compound 3ca:** **$^1\text{H}$  NMR (400 MHz,  $\text{CDCl}_3$ )**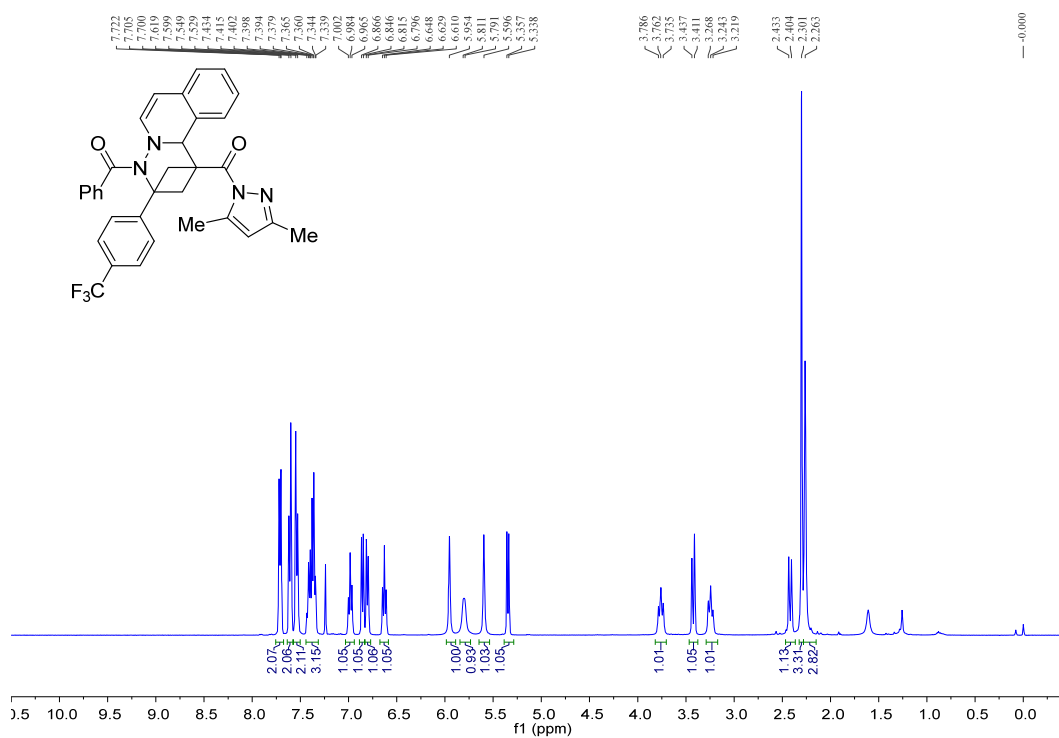 **$^{13}\text{C}$  NMR (100 MHz,  $\text{CDCl}_3$ )**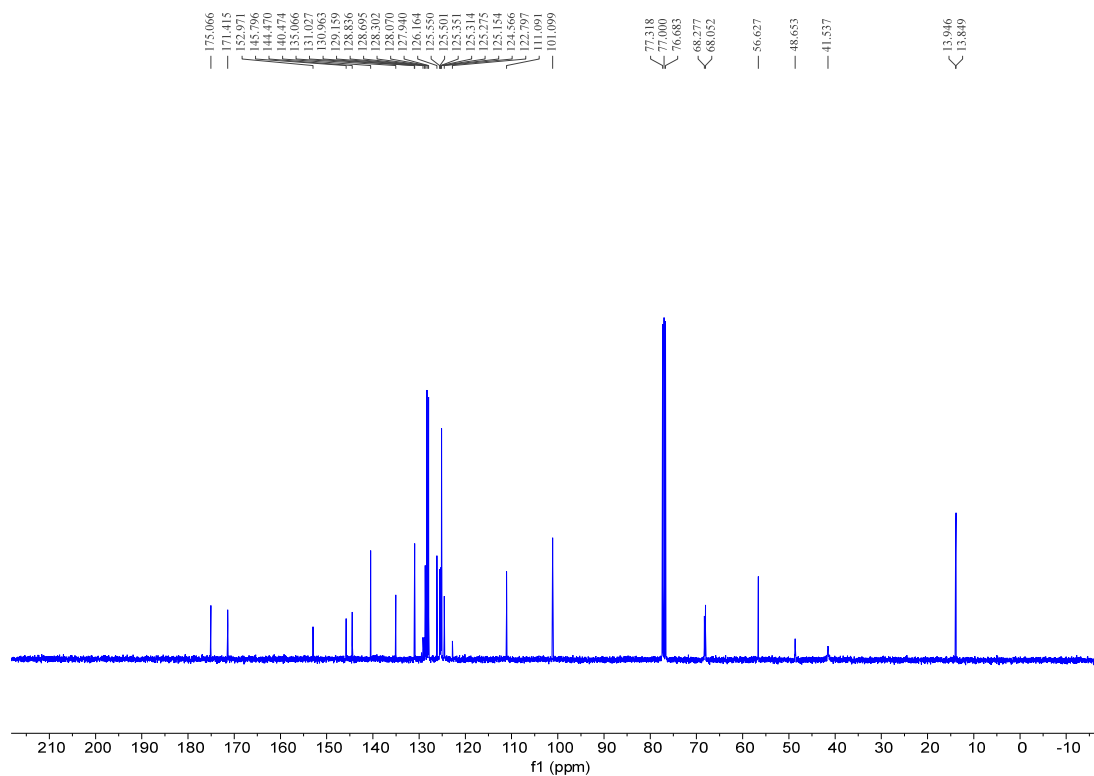

$^{19}\text{F}$  NMR (376 MHz,  $\text{CDCl}_3$ )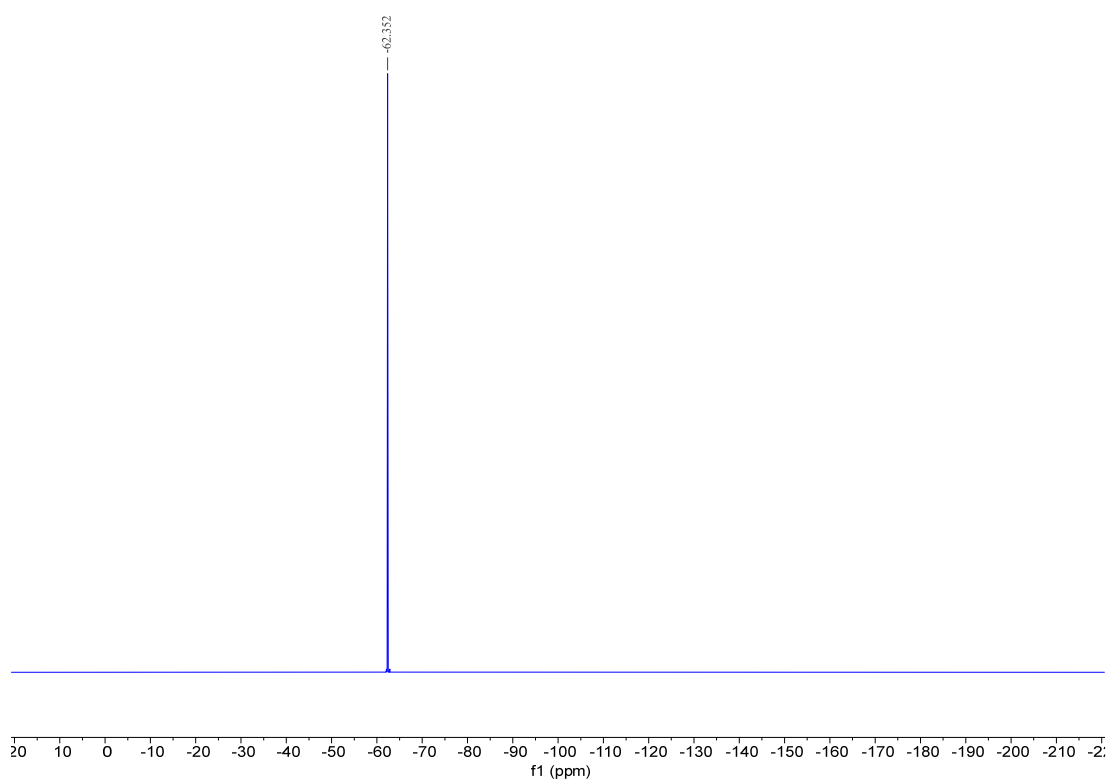 $^1\text{H}$  and  $^{13}\text{C}$  NMR Spectra for Compound 3da: $^1\text{H}$  NMR (400 MHz,  $\text{CDCl}_3$ )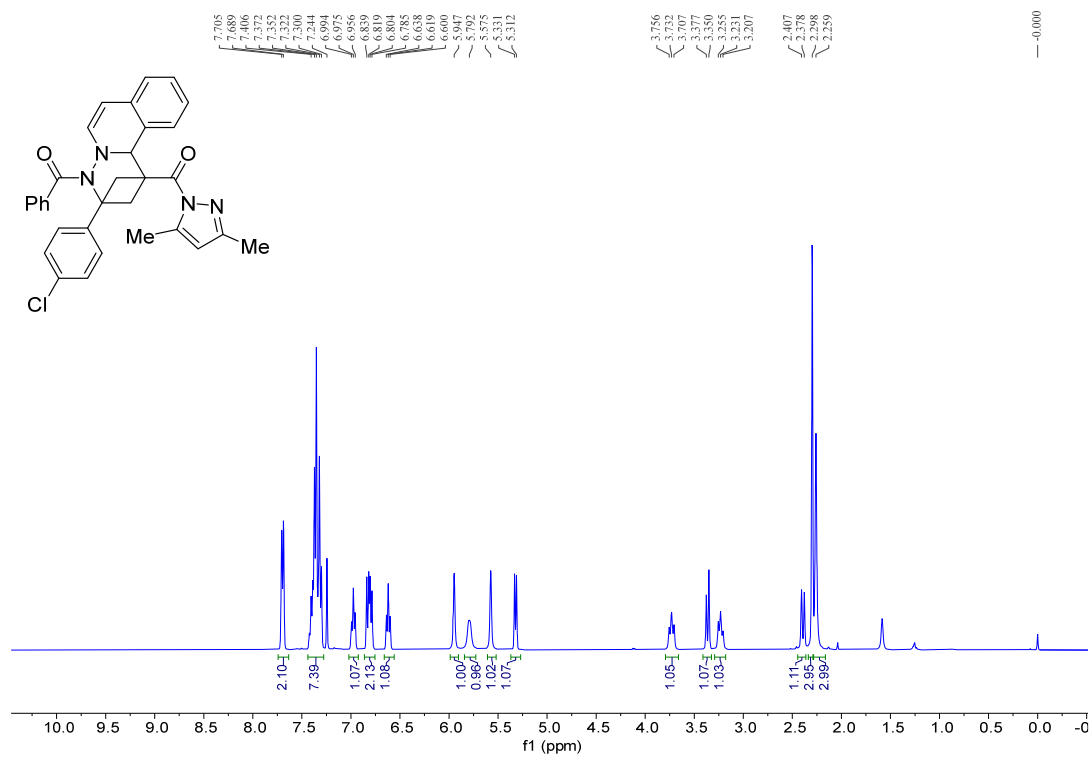 $^{13}\text{C}$  NMR (100 MHz,  $\text{CDCl}_3$ )





$^{13}\text{C}$  NMR (100 MHz,  $\text{CDCl}_3$ )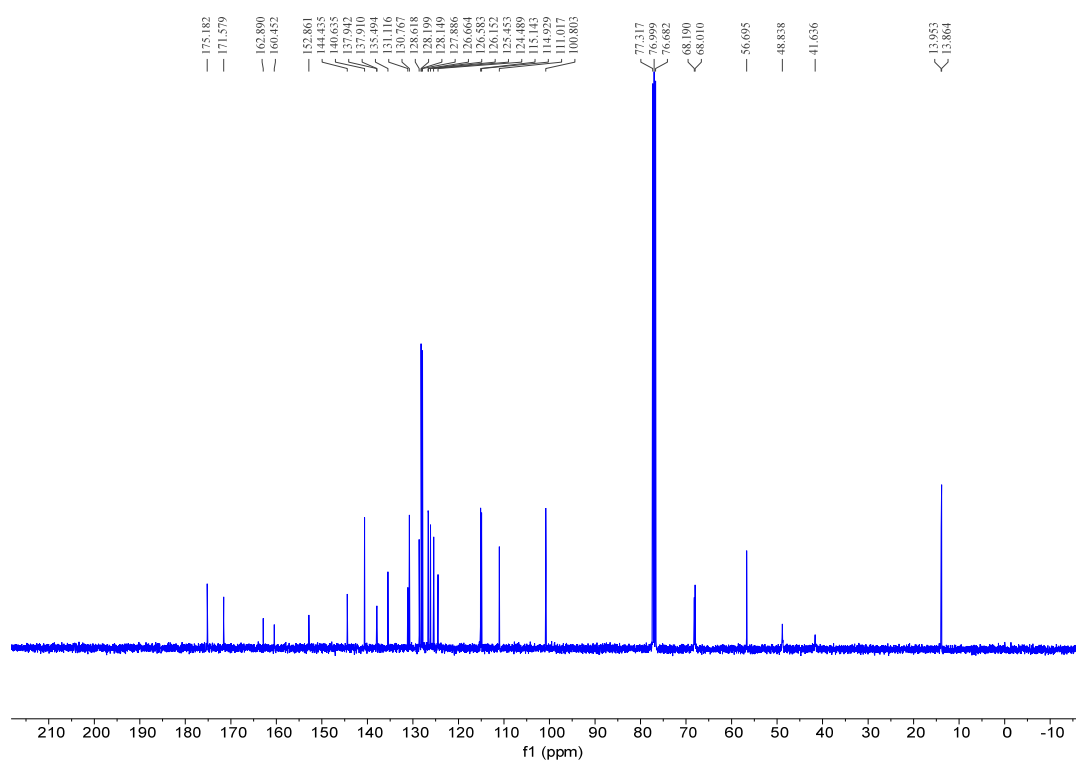 $^{19}\text{F}$  NMR (376 MHz,  $\text{CDCl}_3$ )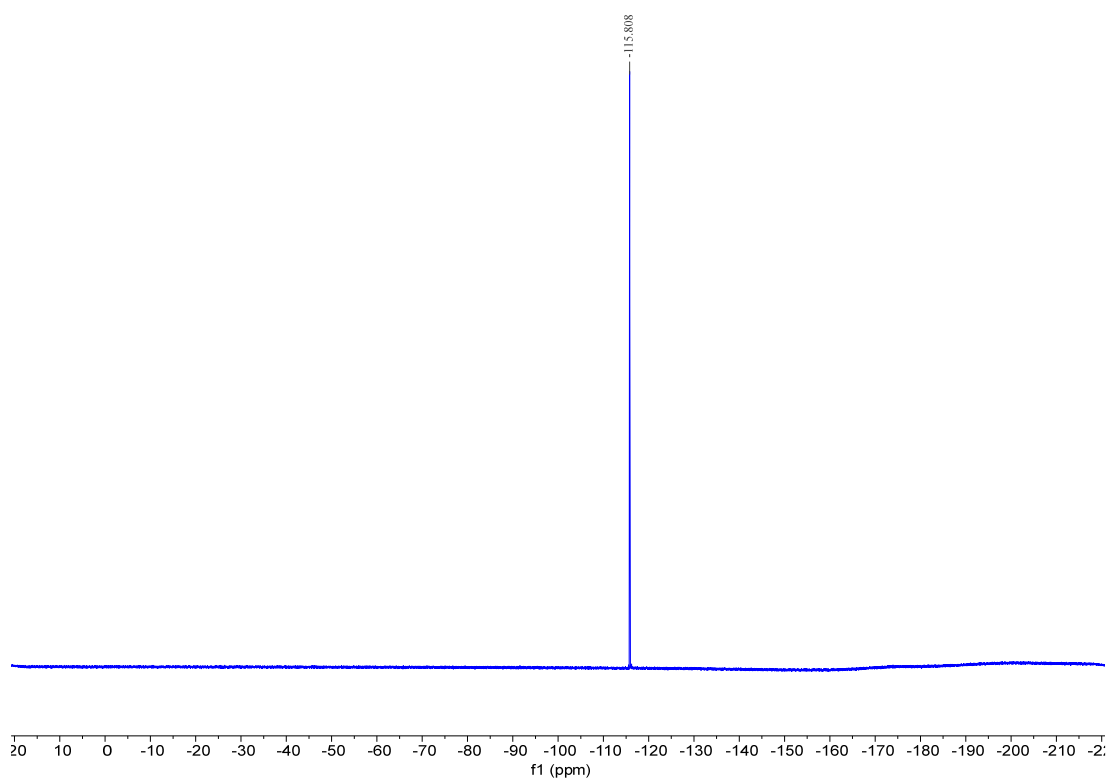

**$^1\text{H}$ ,  $^{13}\text{C}$  and  $^{19}\text{F}$  NMR Spectra for Compound 3fa:** **$^1\text{H}$  NMR (400 MHz,  $\text{CDCl}_3$ )**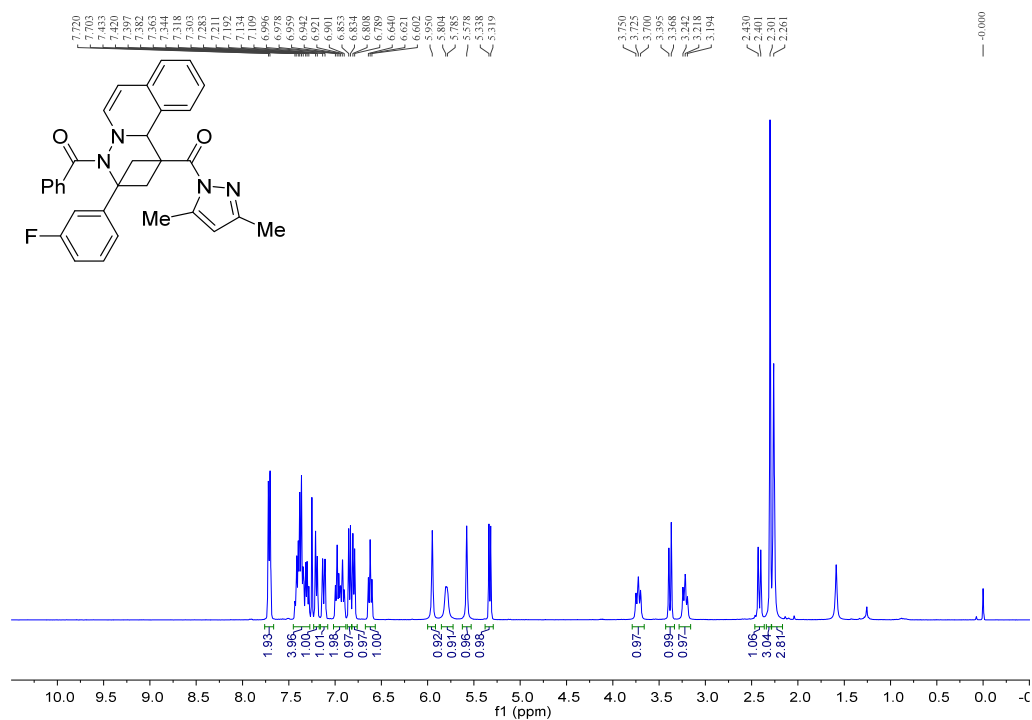 **$^{13}\text{C}$  NMR (100 MHz,  $\text{CDCl}_3$ )**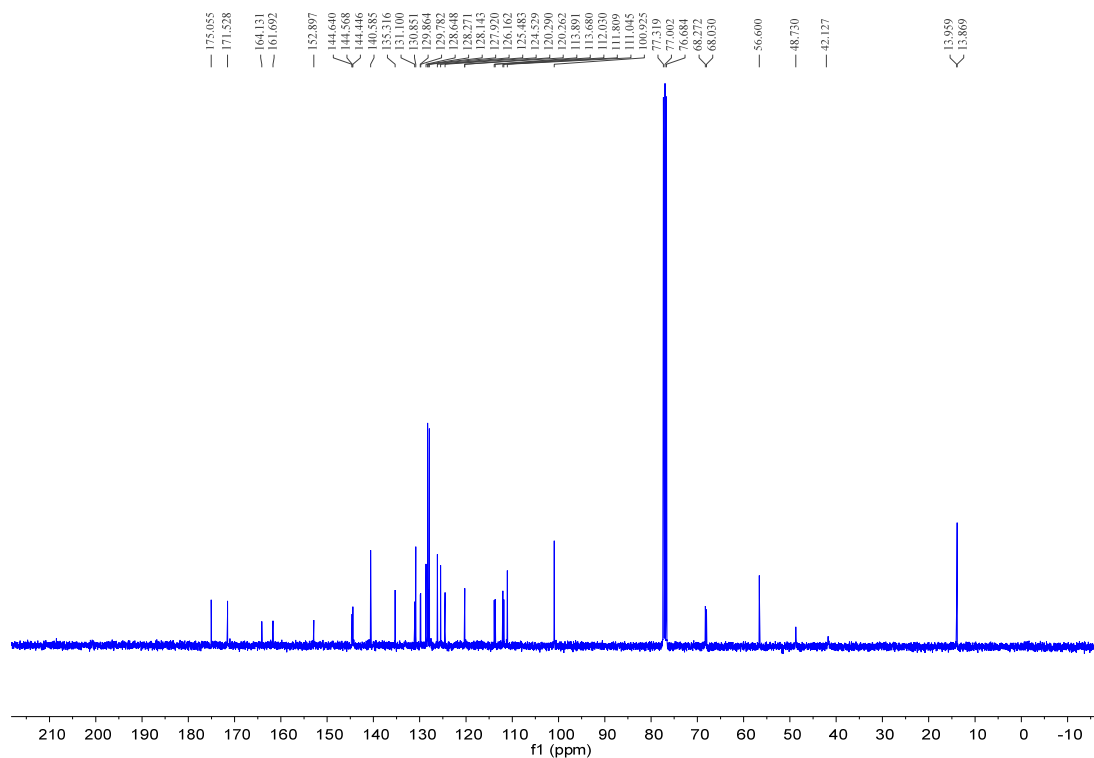

$^{19}\text{F}$  NMR (376 MHz,  $\text{CDCl}_3$ )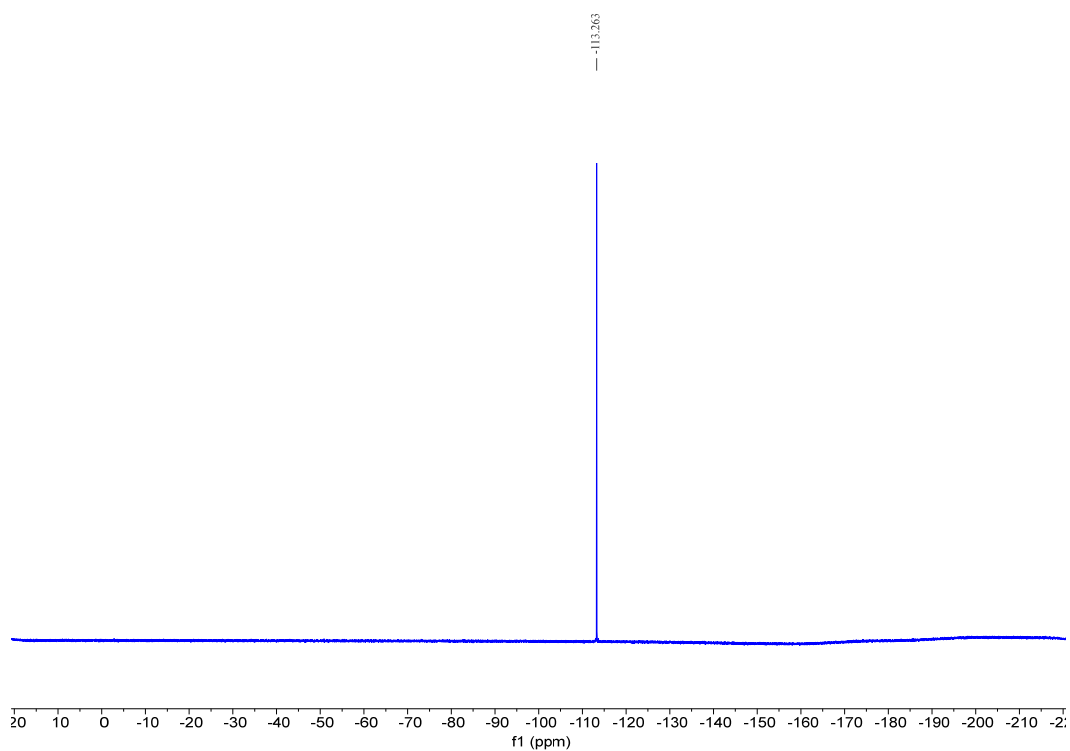 $^1\text{H}$  and  $^{13}\text{C}$  NMR Spectra for Compound 4ab: $^1\text{H}$  NMR (400 MHz,  $\text{CDCl}_3$ )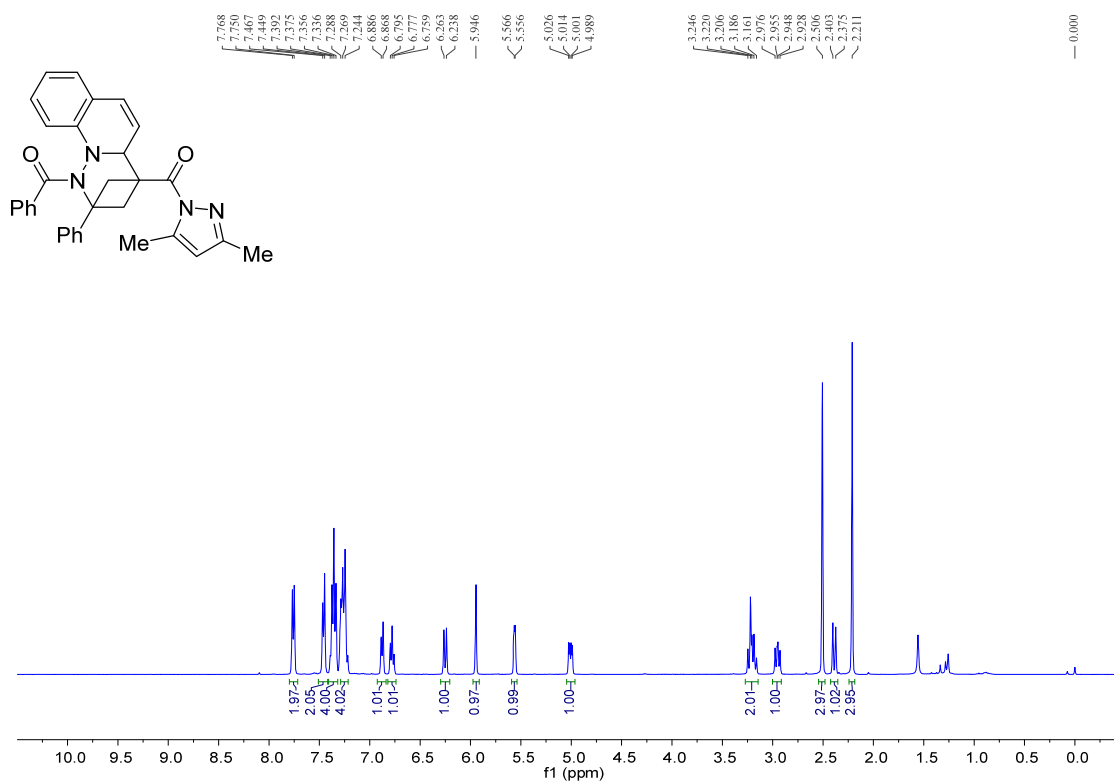

$^{13}\text{C}$  NMR (100 MHz,  $\text{CDCl}_3$ )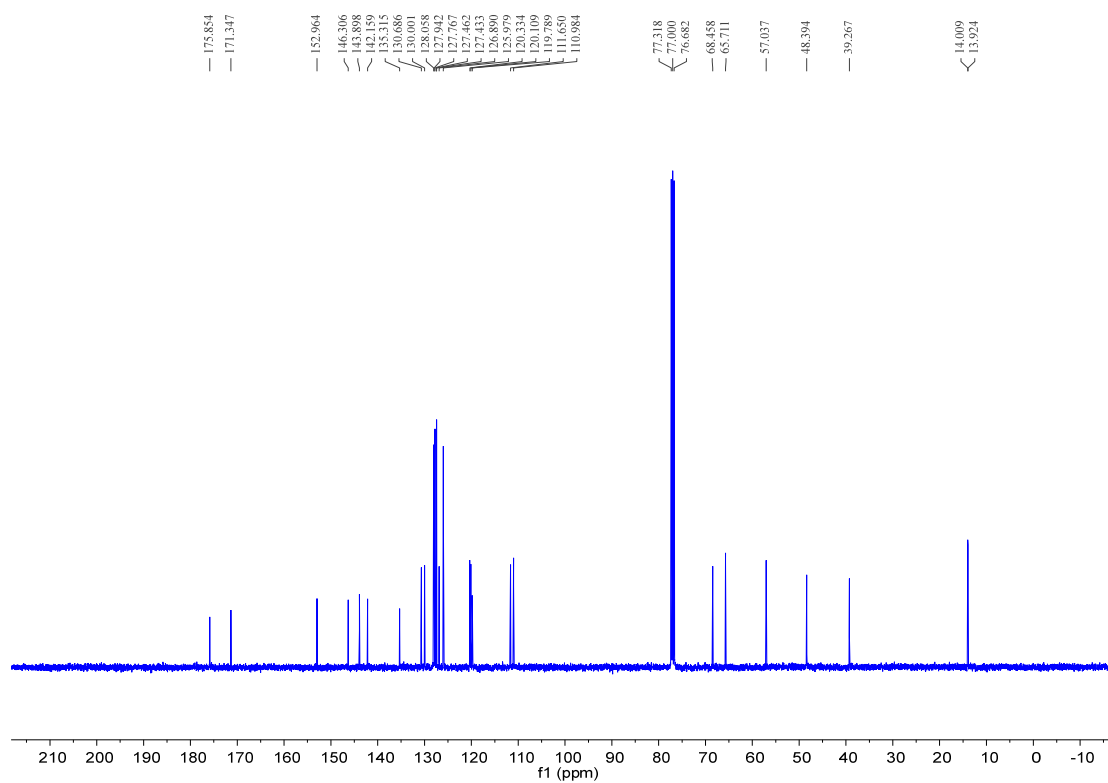 $^1\text{H}$ ,  $^{13}\text{C}$  and  $^{19}\text{F}$  NMR Spectra for Compound 5ac: $^1\text{H}$  NMR (400 MHz,  $\text{CDCl}_3$ )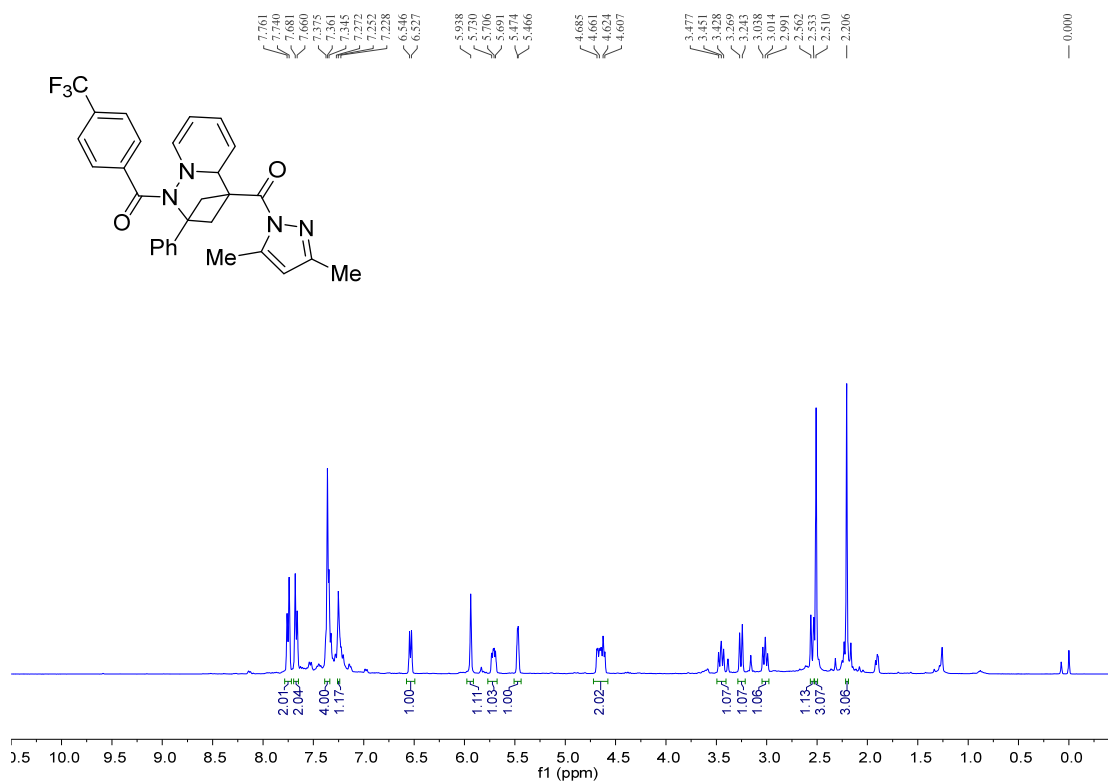

$^{13}\text{C}$  NMR (100 MHz,  $\text{CDCl}_3$ )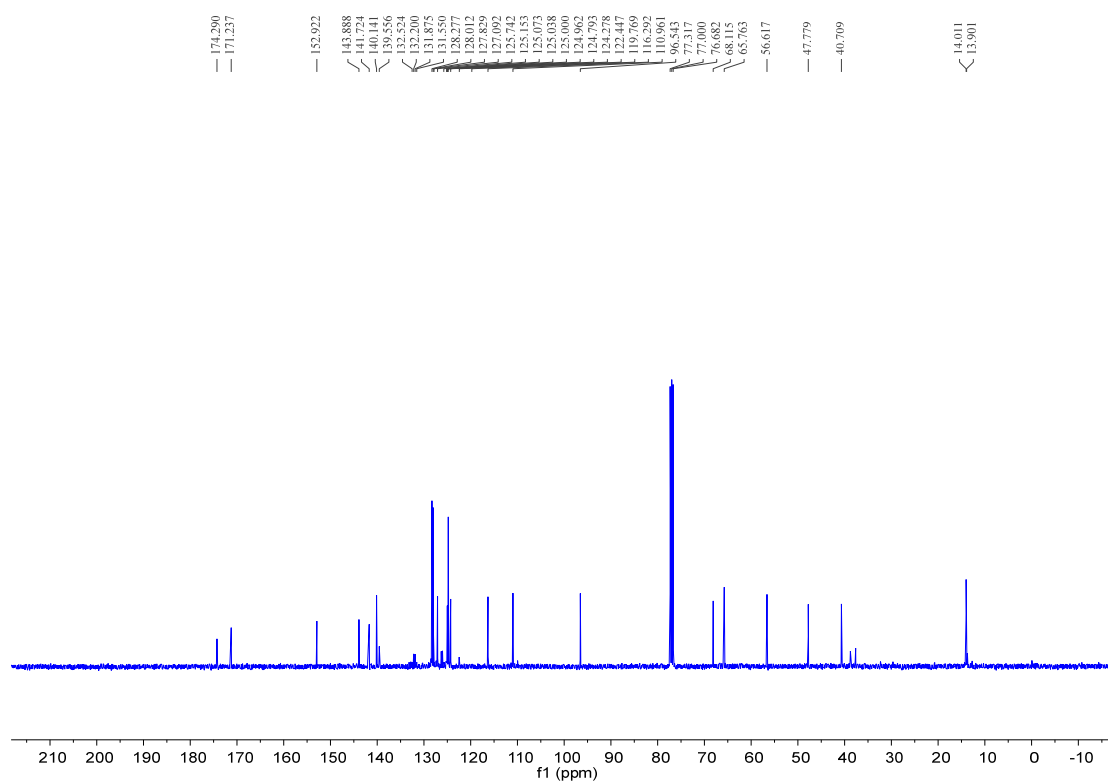 $^{19}\text{F}$  NMR (376 MHz,  $\text{CDCl}_3$ )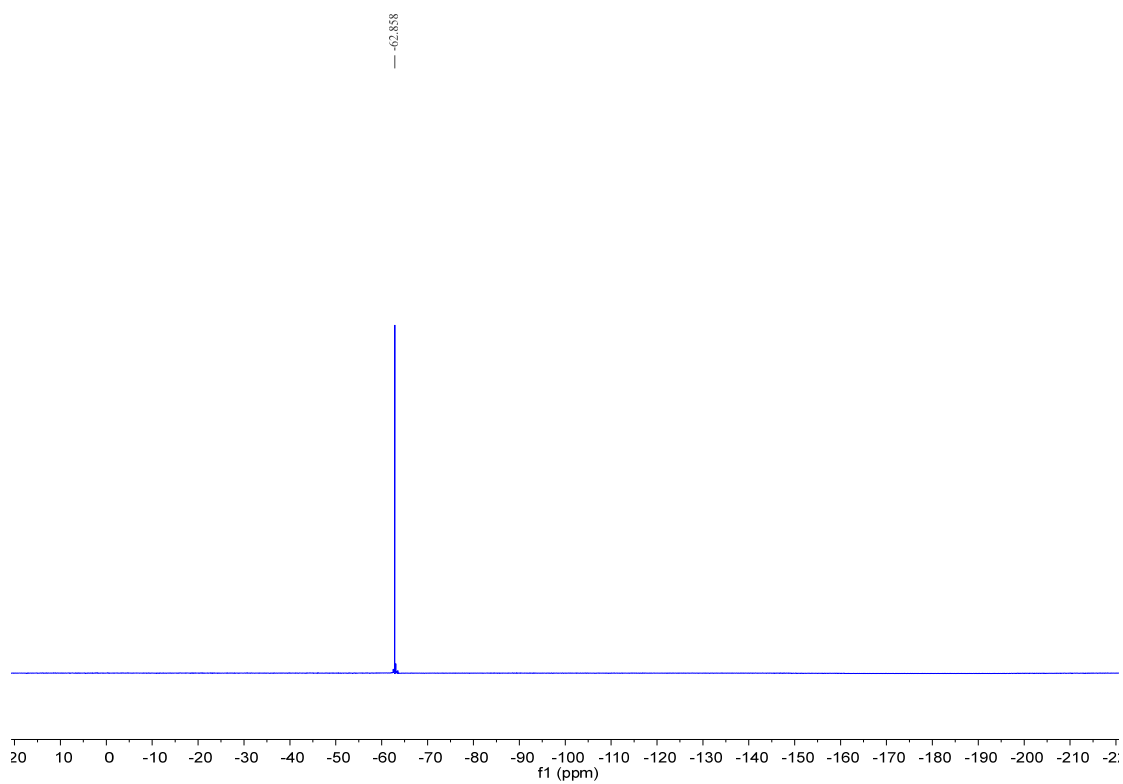

**$^1\text{H}$  and  $^{13}\text{C}$  NMR Spectra for Compound 3ga:** $^1\text{H}$  NMR (400 MHz,  $\text{CDCl}_3$ )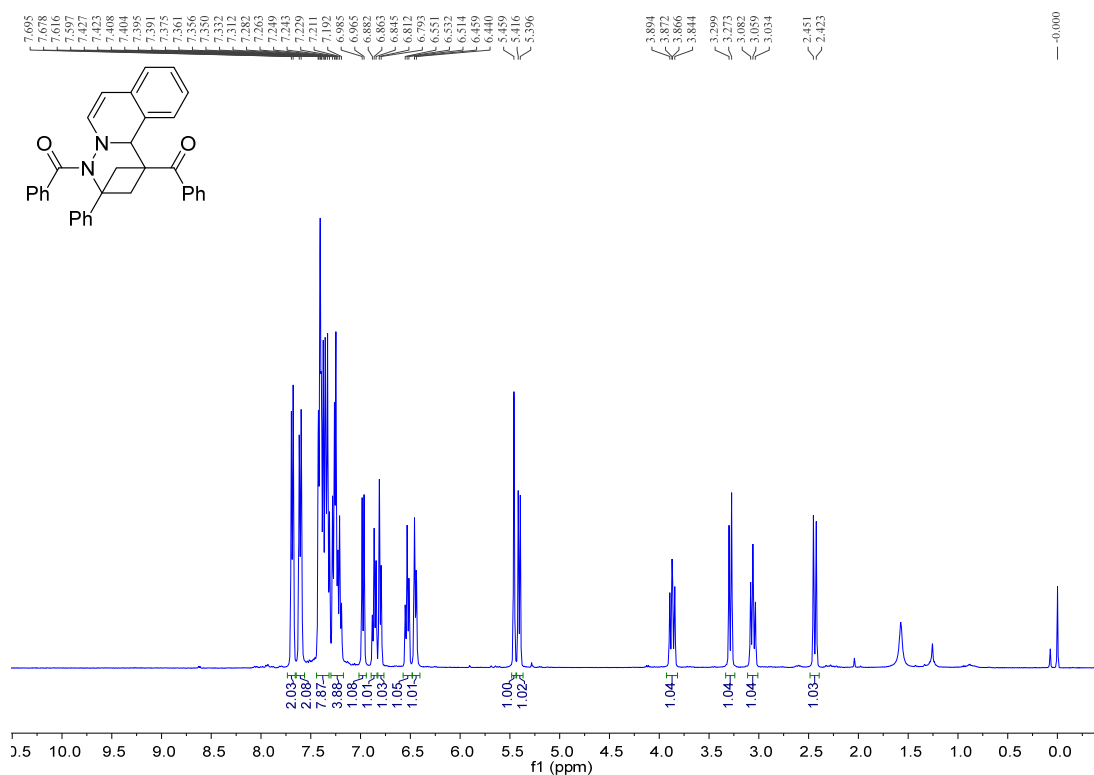 $^{13}\text{C}$  NMR (100 MHz,  $\text{CDCl}_3$ )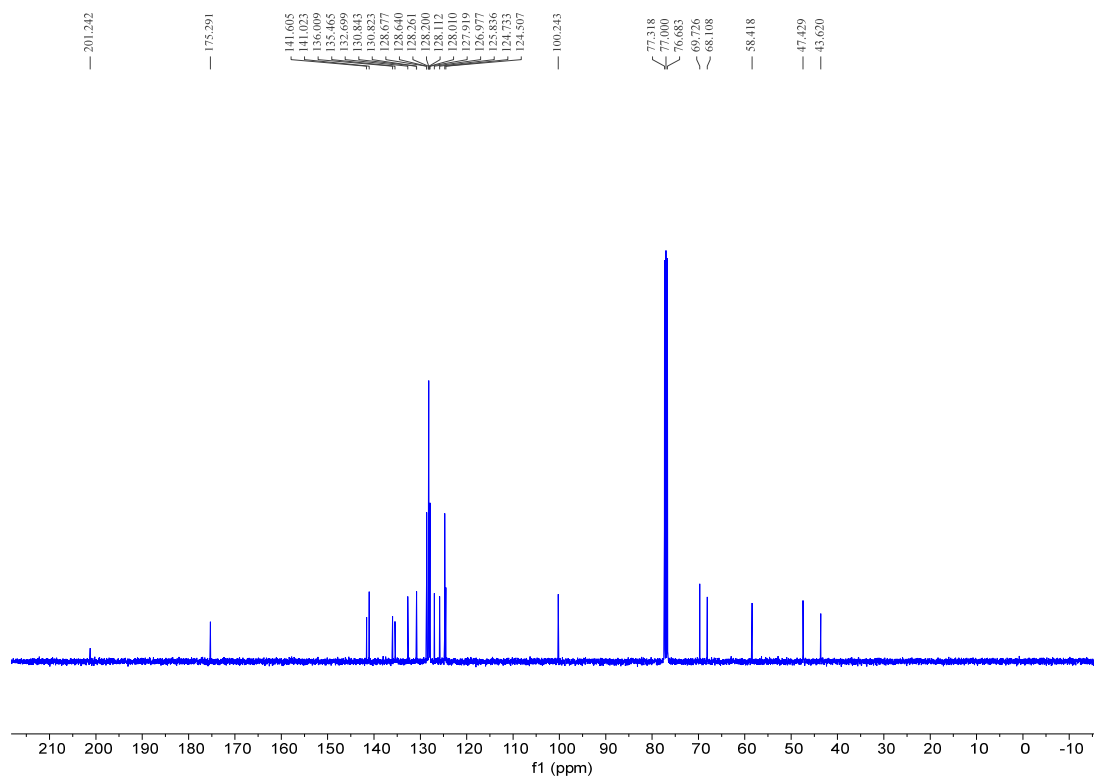

**$^1\text{H}$ ,  $^{13}\text{C}$  and  $^{19}\text{F}$  NMR Spectra for Compound 3ha:** **$^1\text{H}$  NMR (400 MHz,  $\text{CDCl}_3$ )**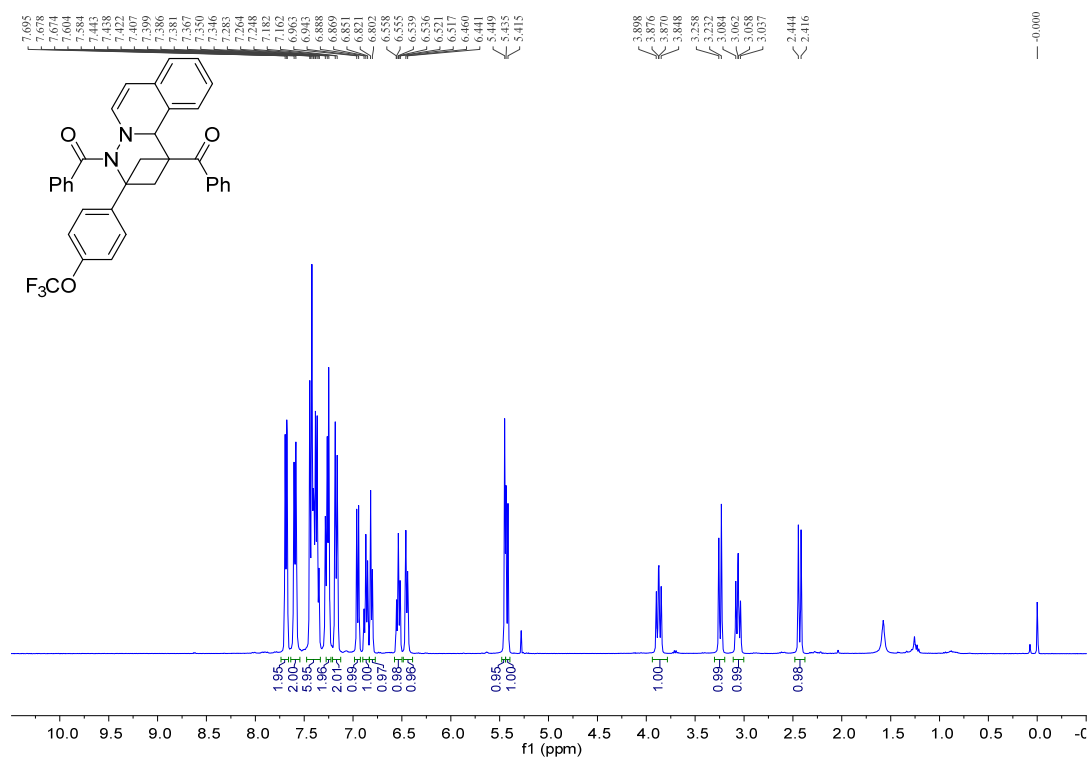 **$^{13}\text{C}$  NMR (100 MHz,  $\text{CDCl}_3$ )**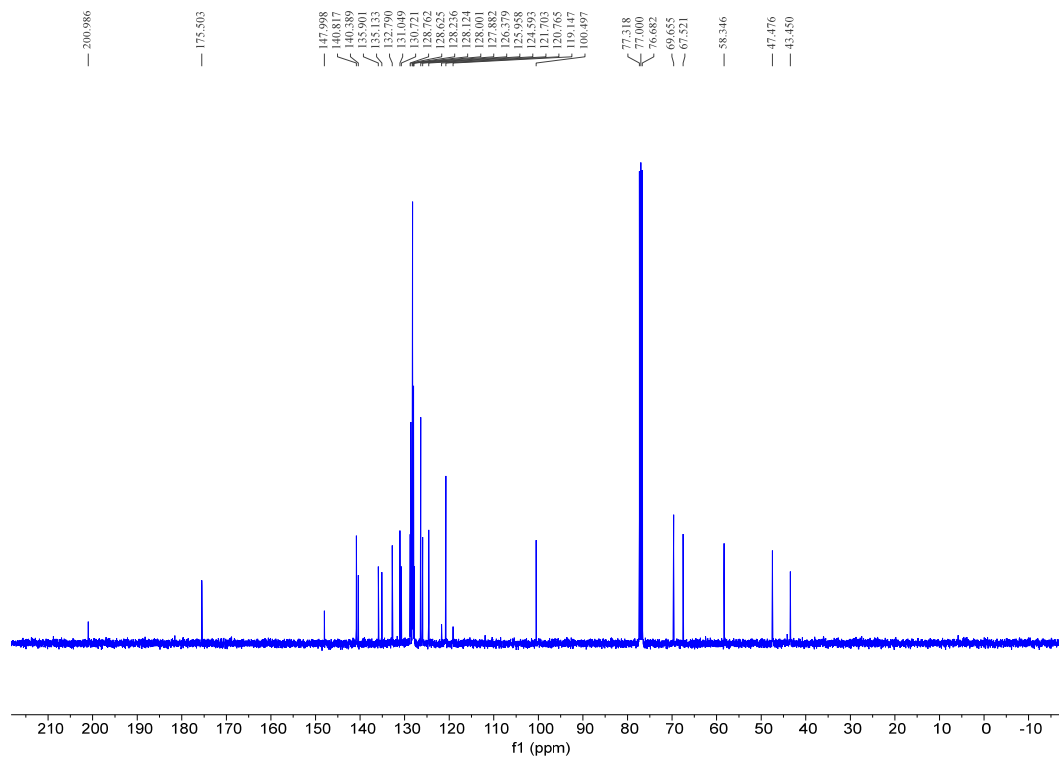



$^{19}\text{F}$  NMR (376 MHz,  $\text{CDCl}_3$ )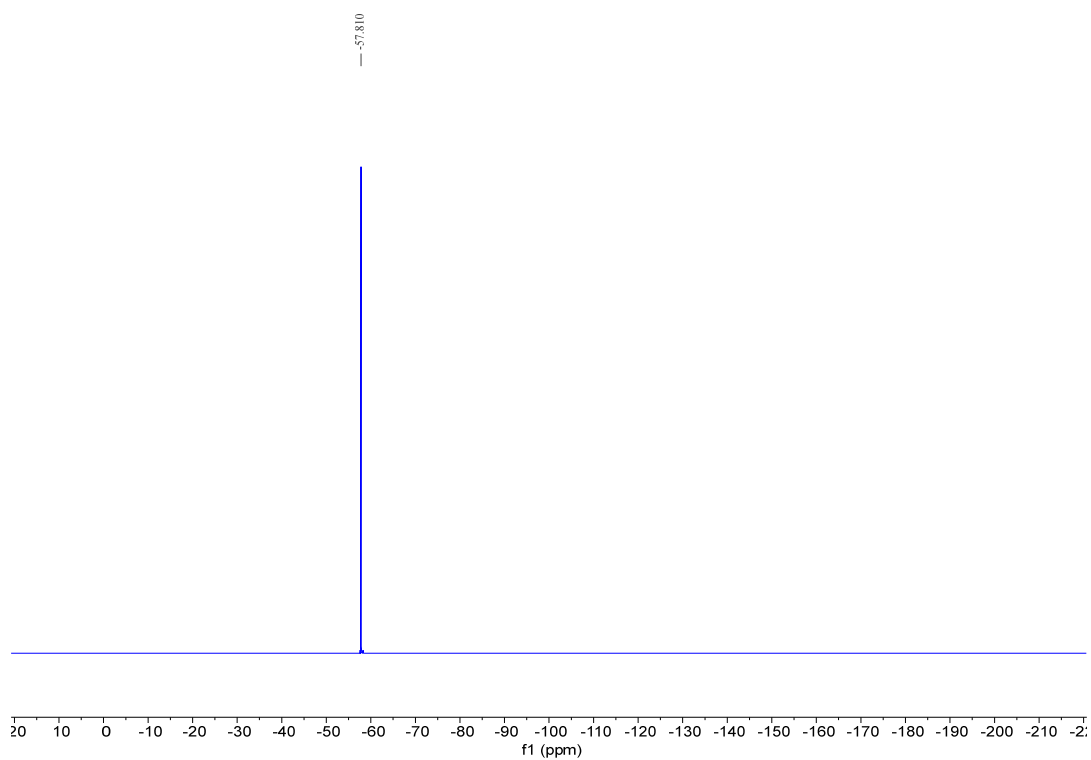 $^1\text{H}$  and  $^{13}\text{C}$  NMR Spectra for Compound 3ia: $^1\text{H}$  NMR (400 MHz,  $\text{CDCl}_3$ )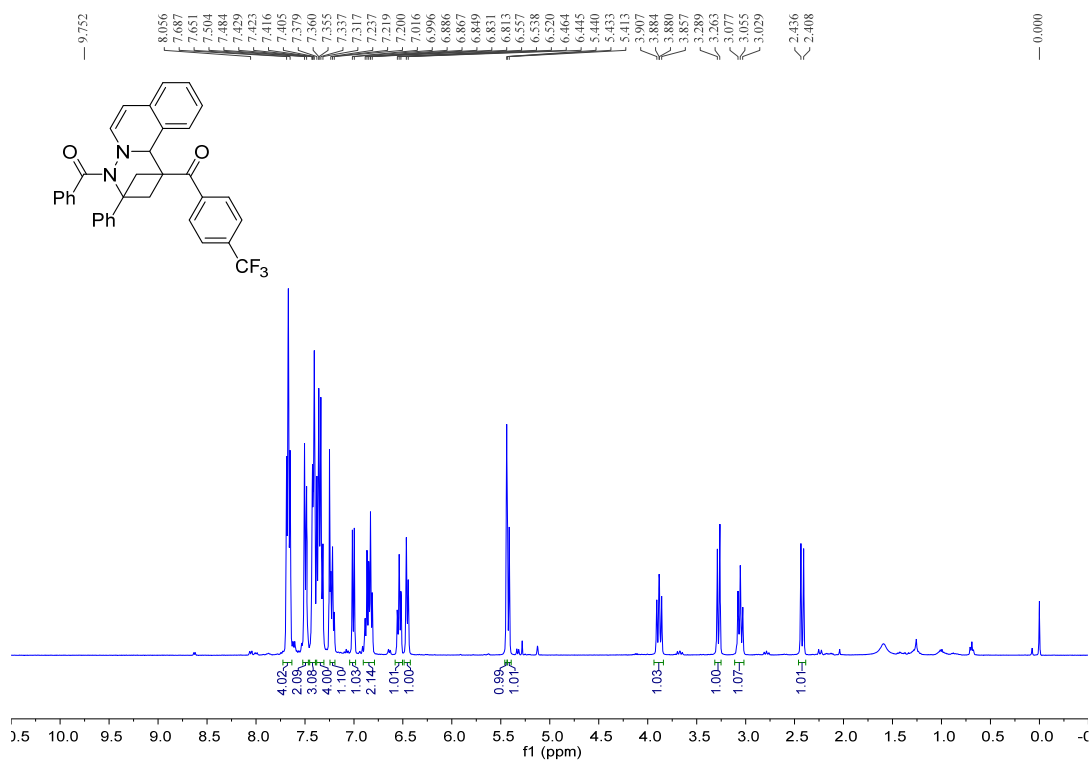

$^{13}\text{C}$  NMR (100 MHz,  $\text{CDCl}_3$ )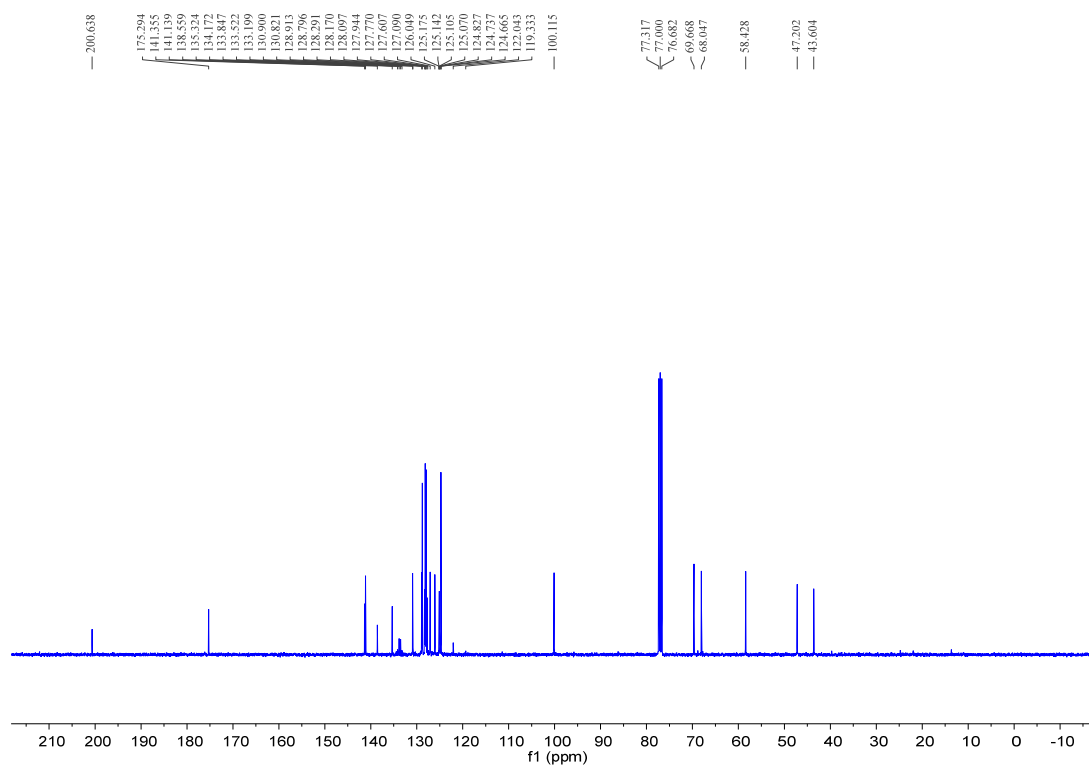 $^{19}\text{F}$  NMR (376 MHz,  $\text{CDCl}_3$ )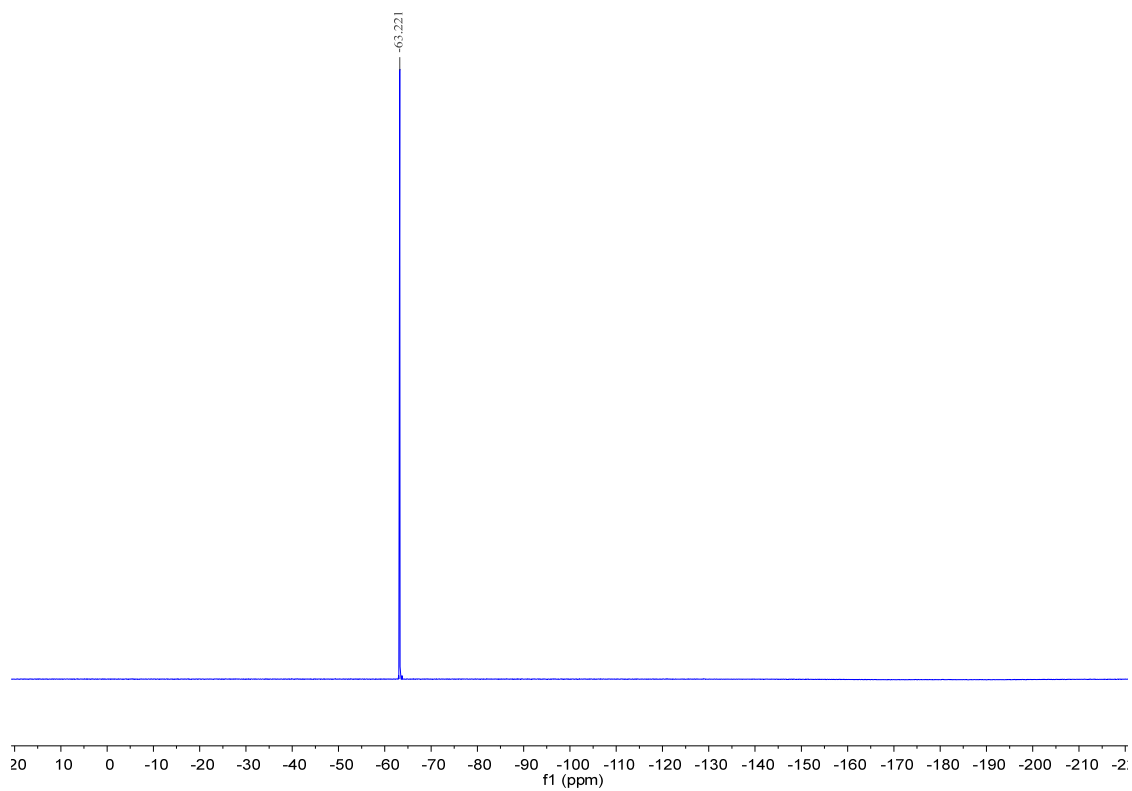

**$^1\text{H}$ ,  $^{13}\text{C}$  and  $^{19}\text{F}$  NMR Spectra for Compound 3ja:** **$^1\text{H}$  NMR (400 MHz,  $\text{CDCl}_3$ )**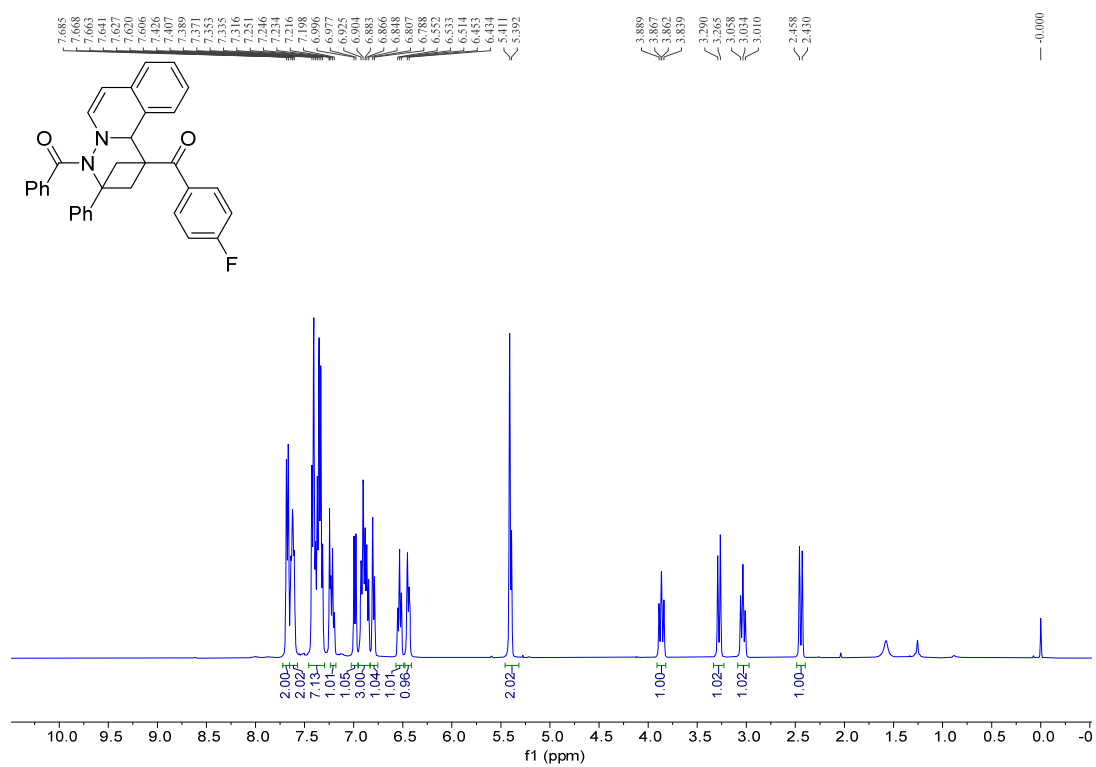 **$^{13}\text{C}$  NMR (100 MHz,  $\text{CDCl}_3$ )**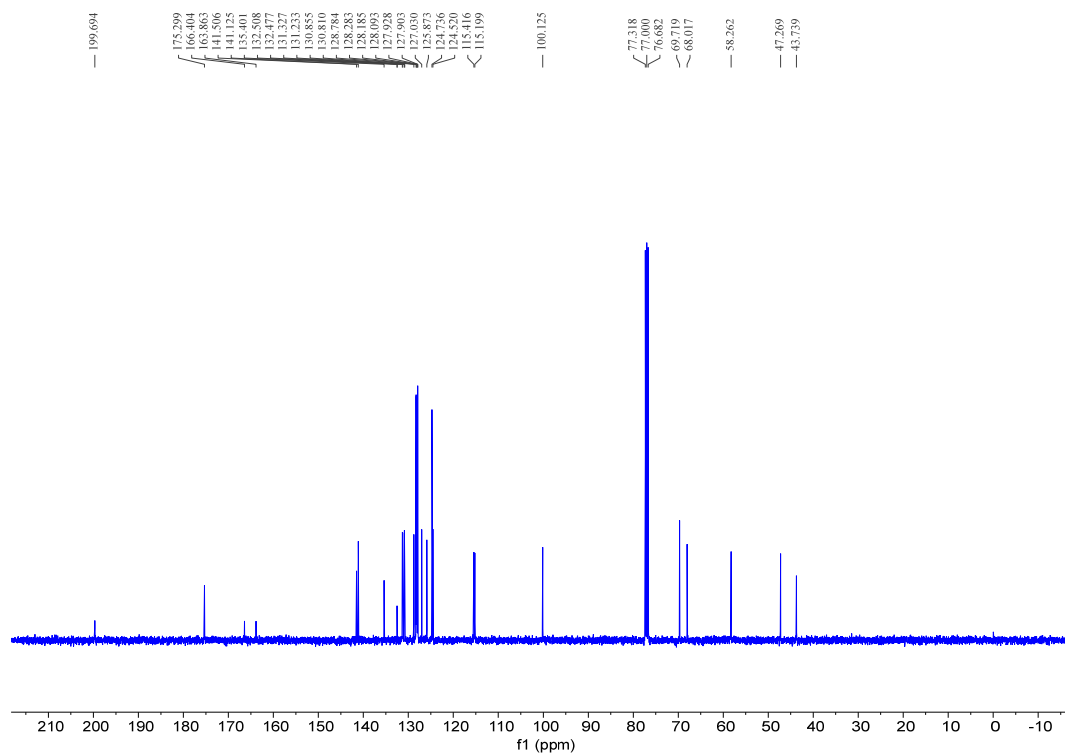

$^{19}\text{F}$  NMR (376 MHz,  $\text{CDCl}_3$ )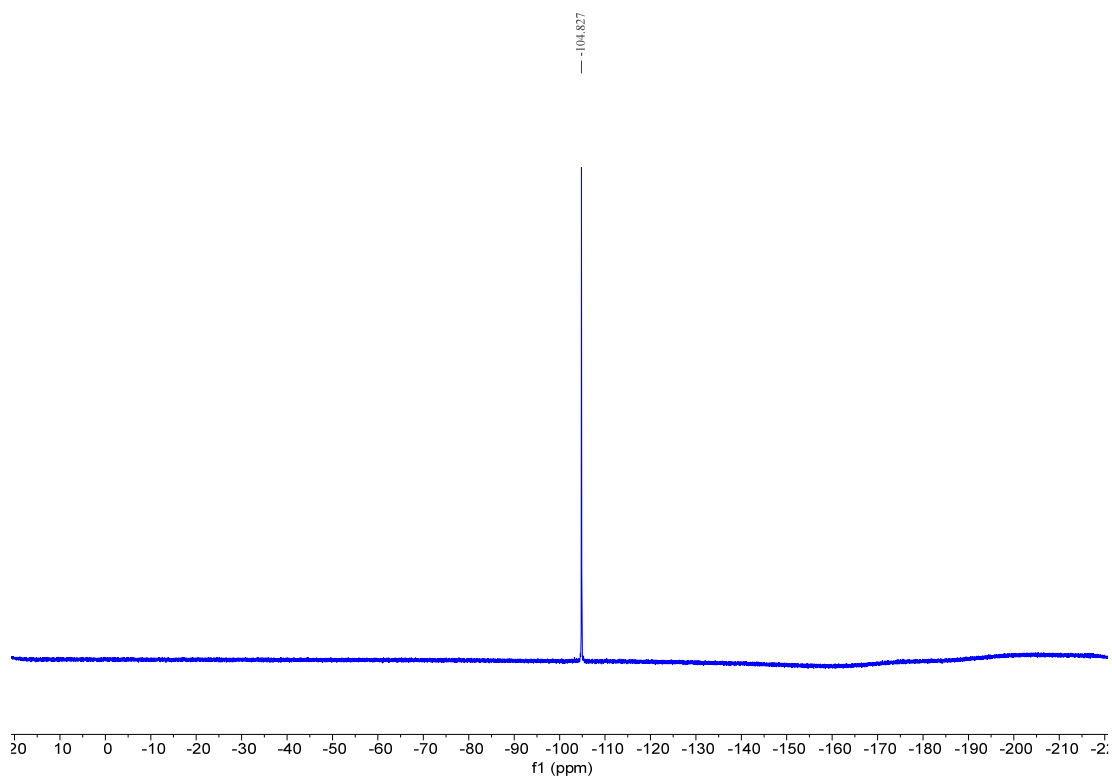 $^1\text{H}$  and  $^{13}\text{C}$  NMR Spectra for Compound 3ka: $^1\text{H}$  NMR (400 MHz,  $\text{CDCl}_3$ )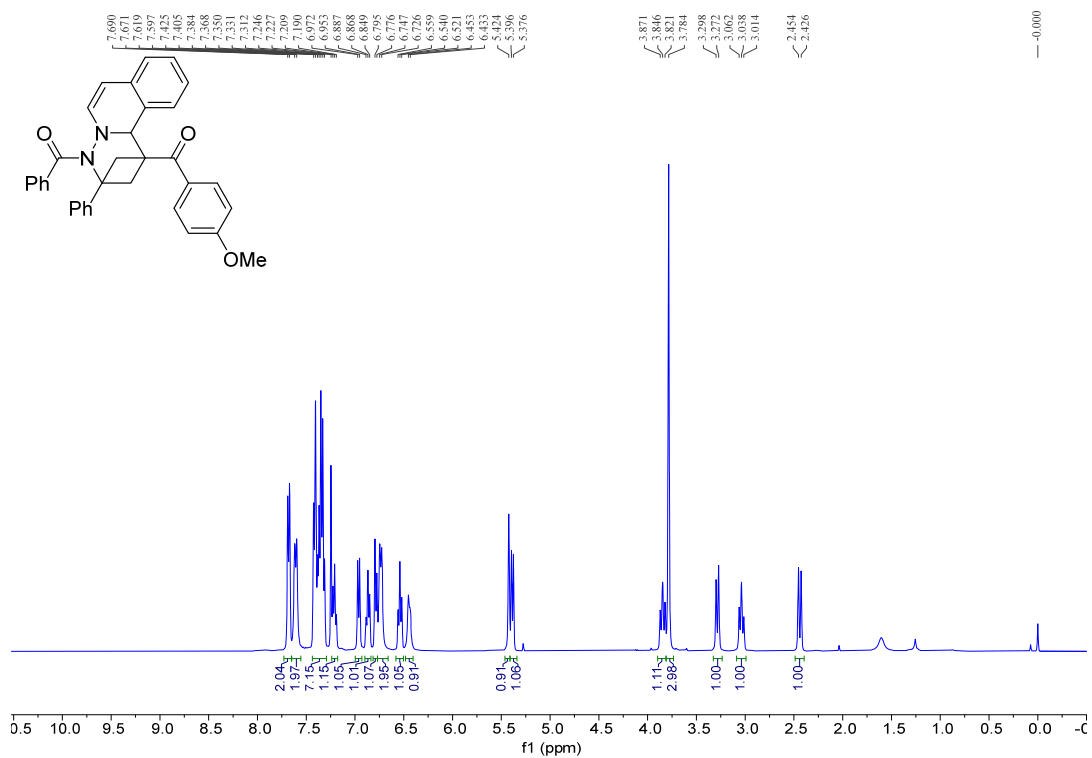

$^{13}\text{C}$  NMR (100 MHz,  $\text{CDCl}_3$ )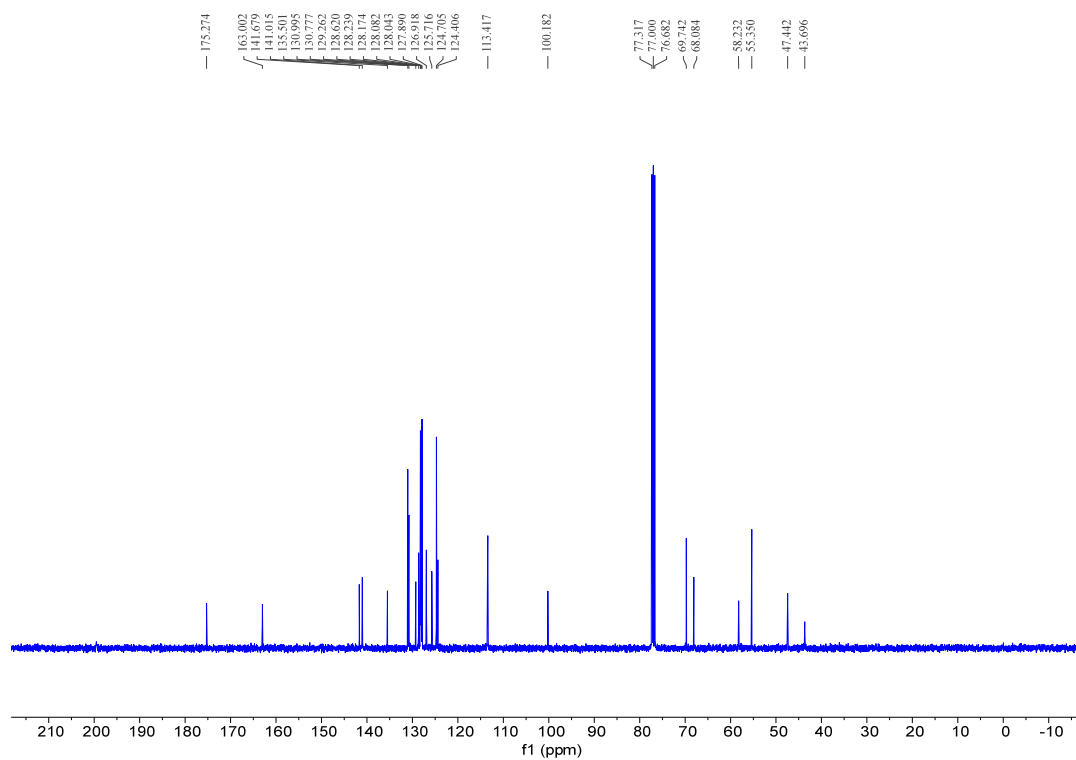 $^1\text{H}$ ,  $^{13}\text{C}$  and  $^{19}\text{F}$  NMR Spectra for Compound 3la: $^1\text{H}$  NMR (400 MHz,  $\text{CDCl}_3$ )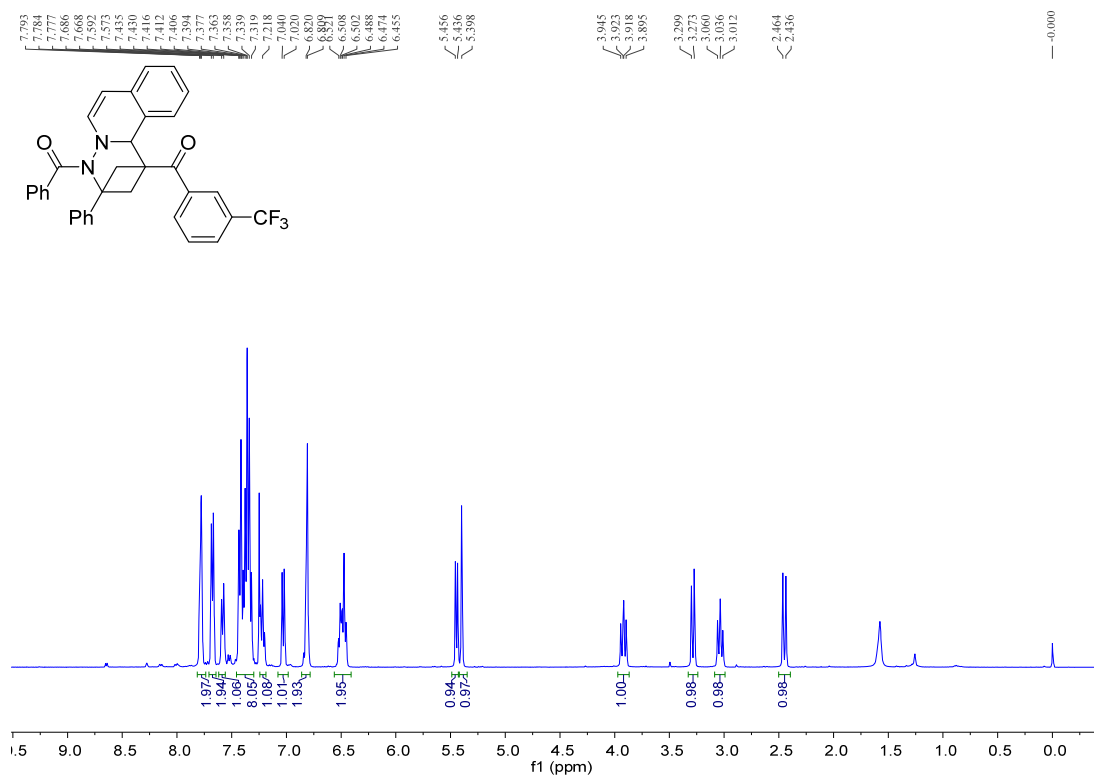

$^{13}\text{C}$  NMR (100 MHz,  $\text{CDCl}_3$ )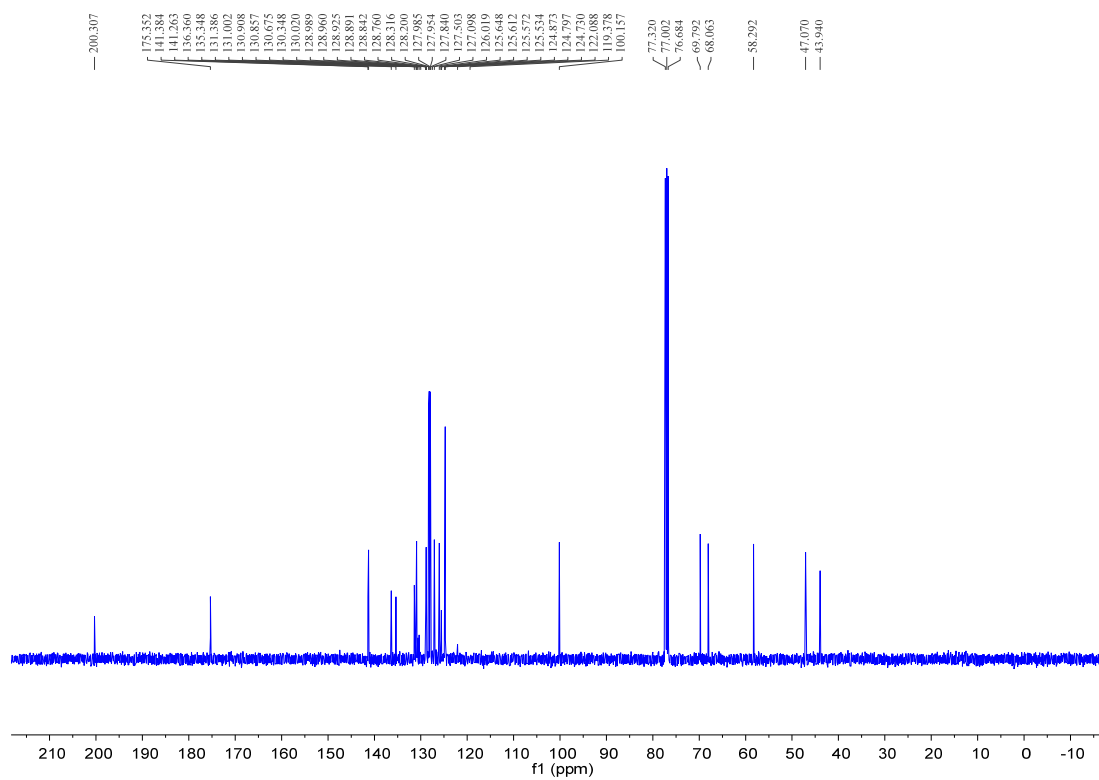 $^{19}\text{F}$  NMR (376 MHz,  $\text{CDCl}_3$ )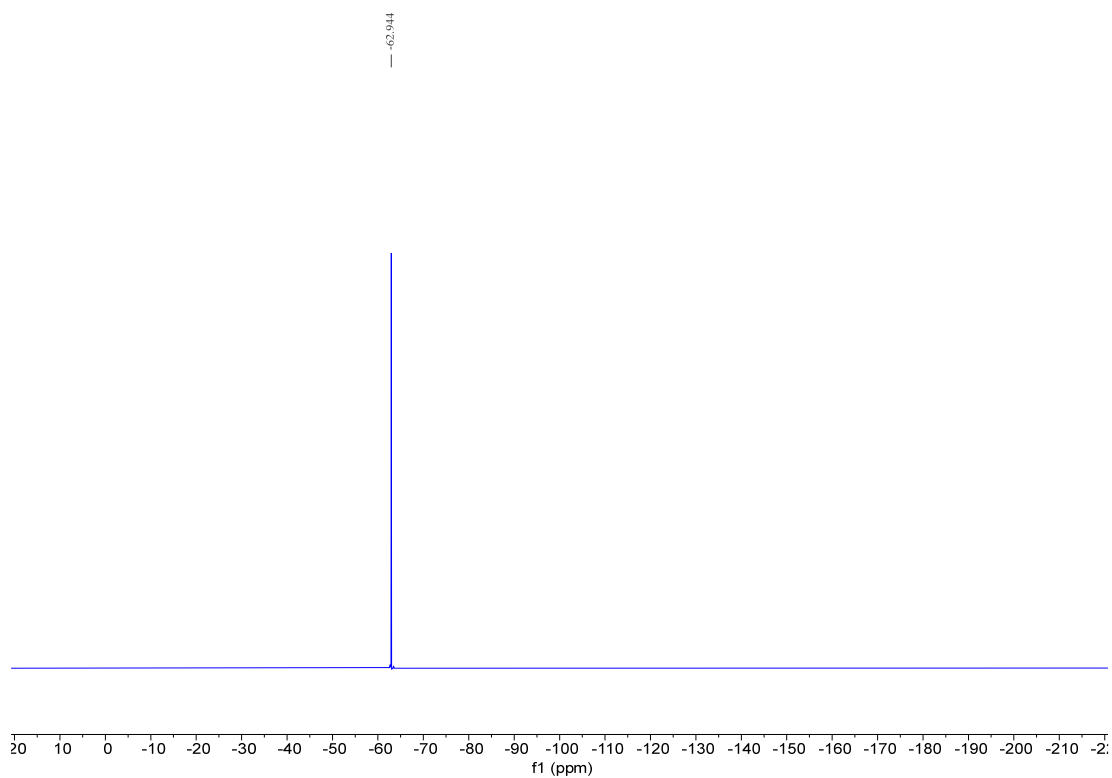

**<sup>1</sup>H and <sup>13</sup>C NMR Spectra for Compound 3ma:****<sup>1</sup>H NMR (400 MHz, CDCl<sub>3</sub>)**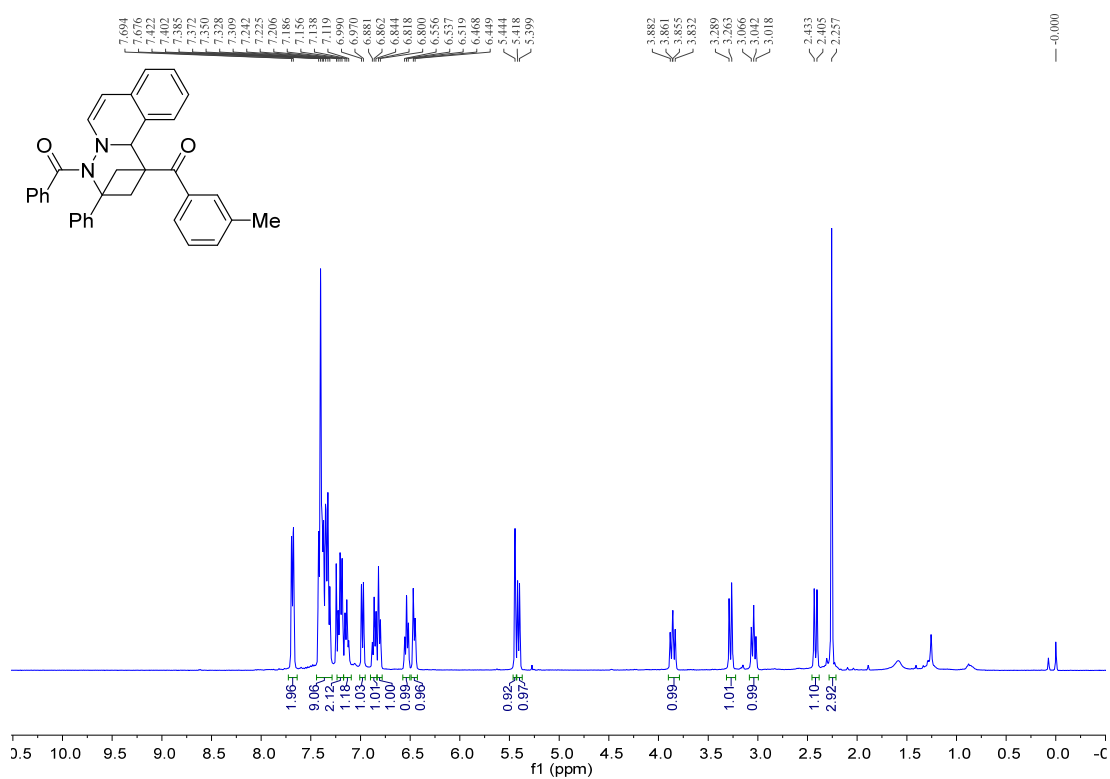**<sup>13</sup>C NMR (100 MHz, CDCl<sub>3</sub>)**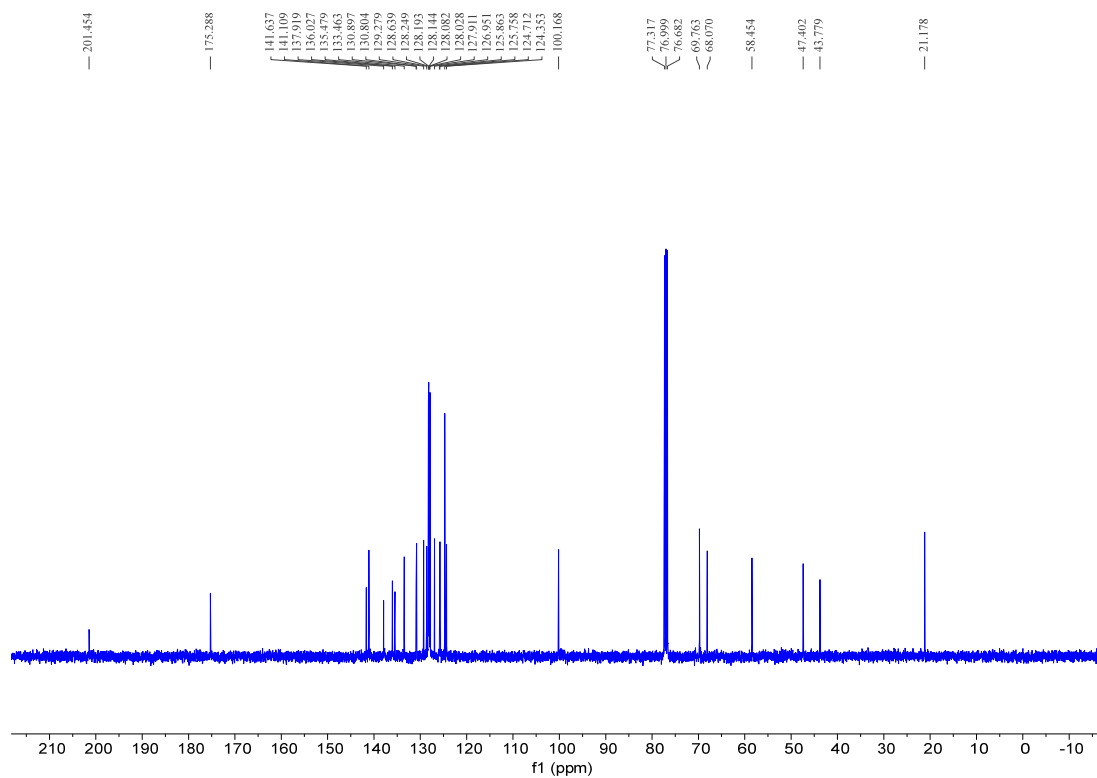

**$^1\text{H}$  and  $^{13}\text{C}$  NMR Spectra for Compound 3na:** $^1\text{H}$  NMR (400 MHz,  $\text{CDCl}_3$ )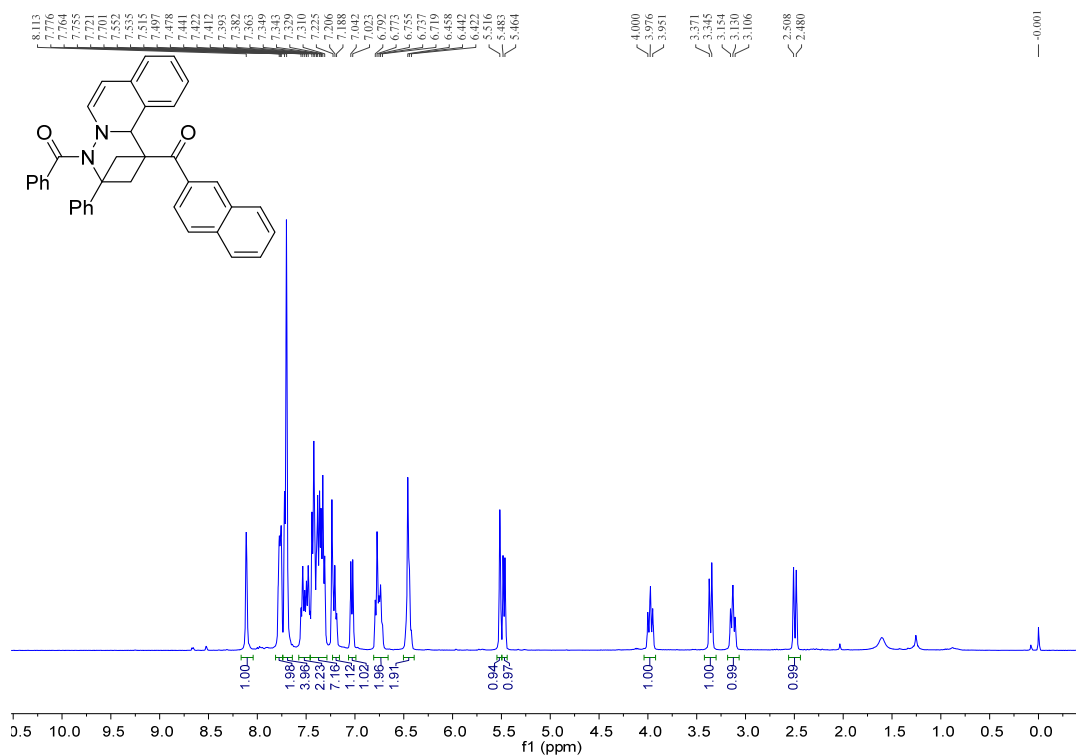 $^{13}\text{C}$  NMR (100 MHz,  $\text{CDCl}_3$ )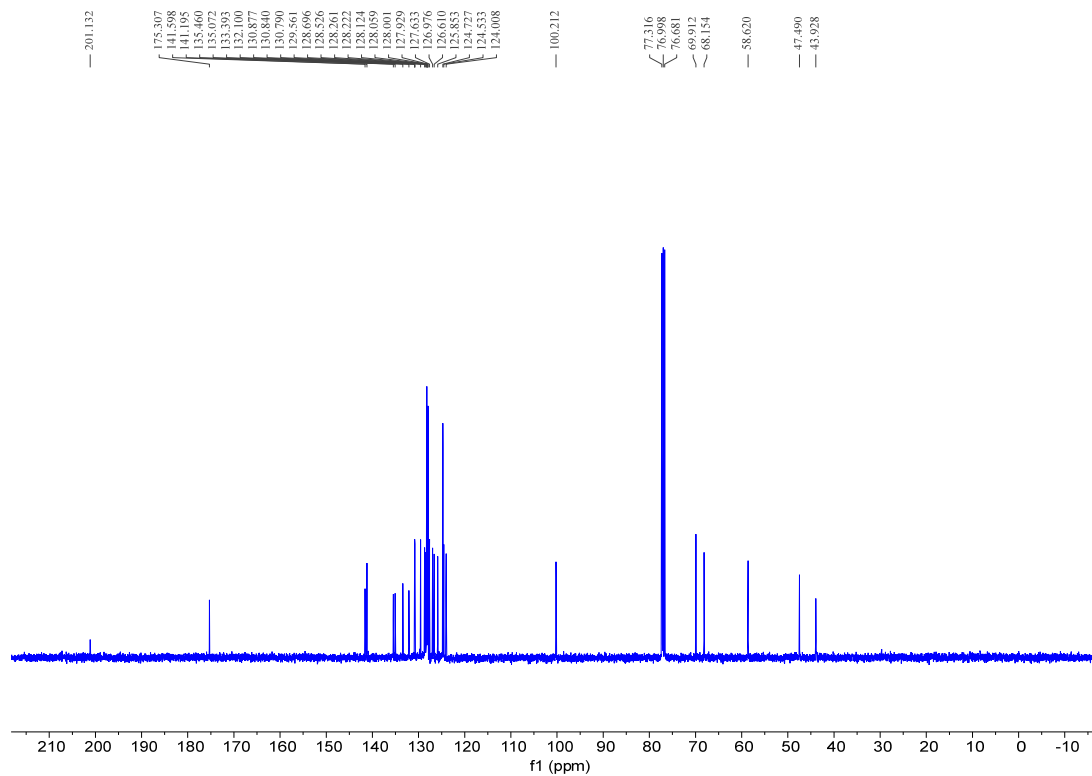



**$^1\text{H}$  and  $^{13}\text{C}$  NMR Spectra for Compound 30a:** **$^1\text{H}$  NMR (400 MHz,  $\text{CDCl}_3$ )**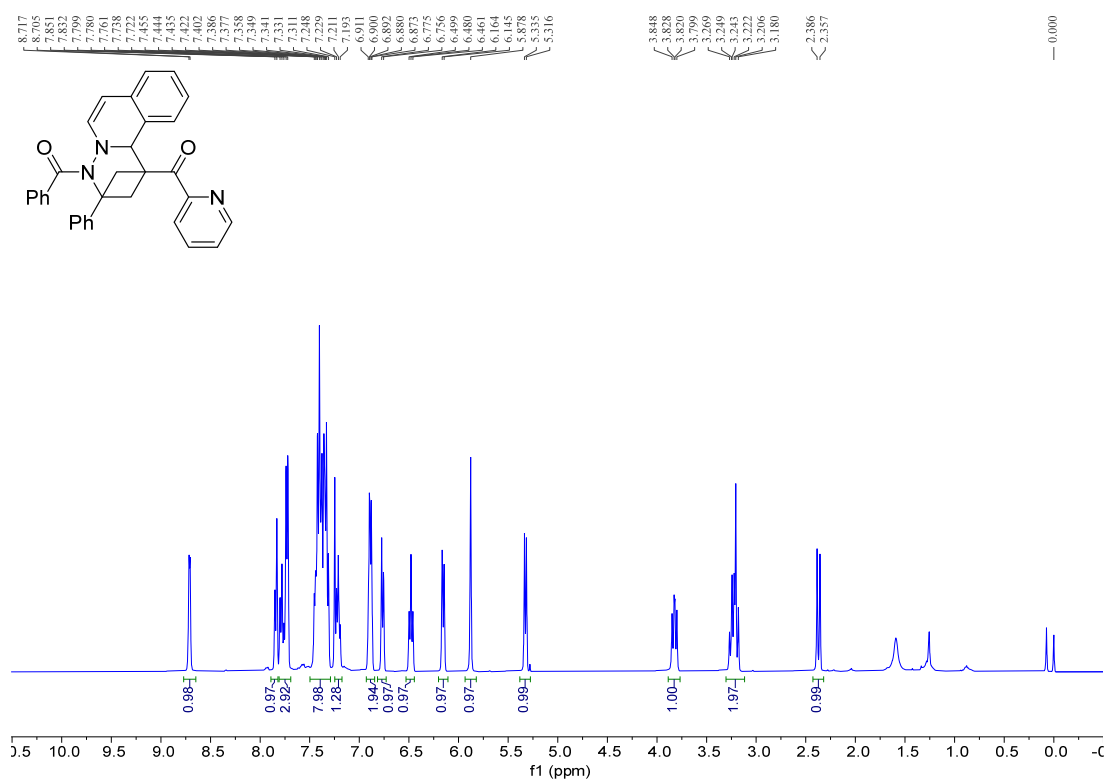 **$^{13}\text{C}$  NMR (100 MHz,  $\text{CDCl}_3$ )**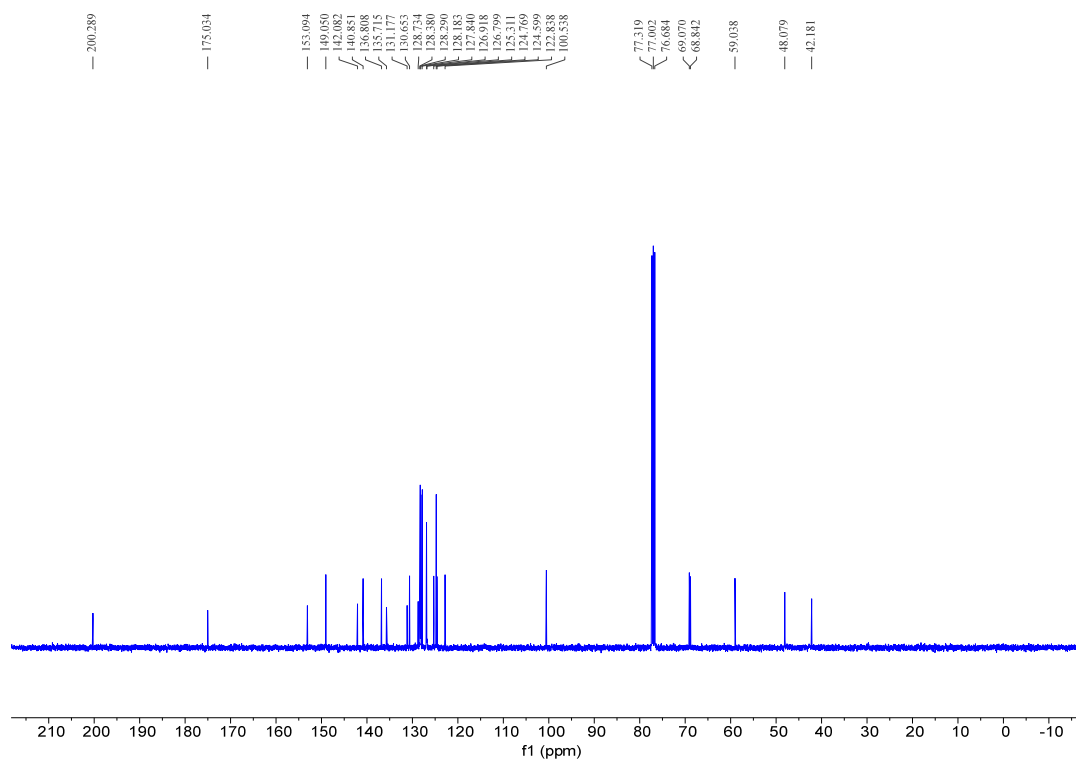

**$^1\text{H}$  and  $^{13}\text{C}$  Spectra for Compound 3pa:** $^1\text{H}$  NMR (400 MHz,  $\text{CDCl}_3$ )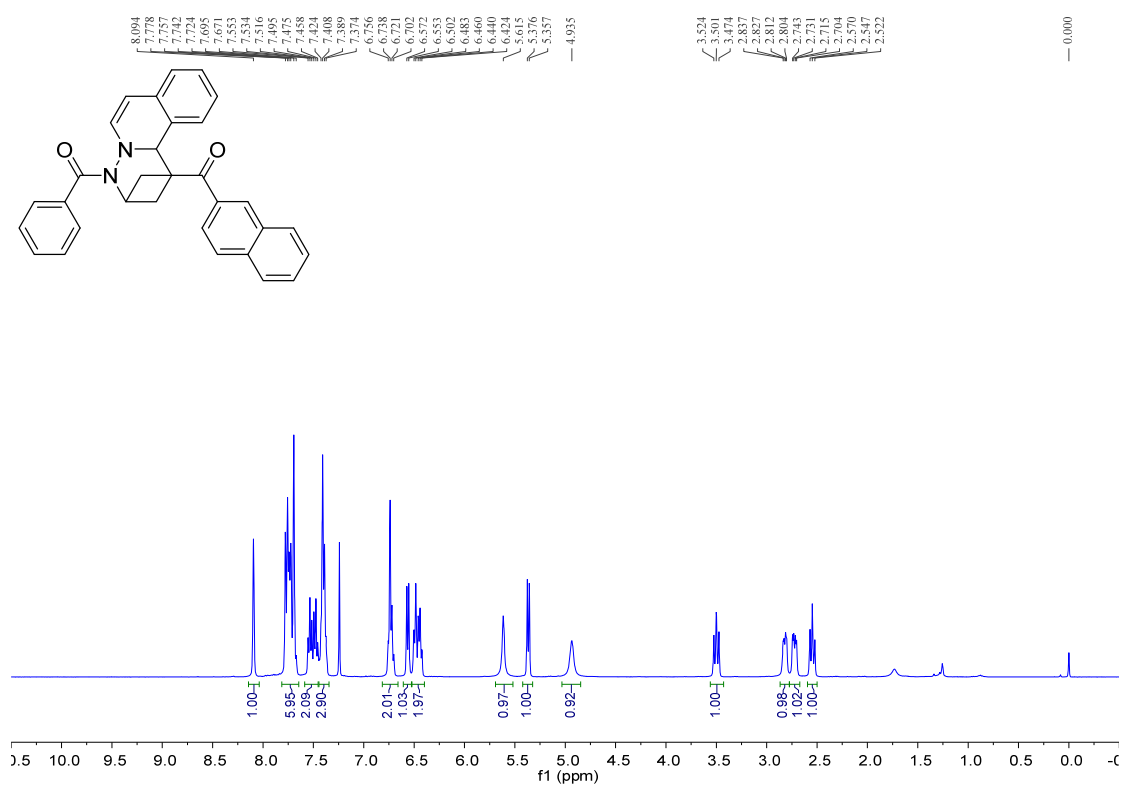 $^{13}\text{C}$  NMR (100 MHz,  $\text{CDCl}_3$ )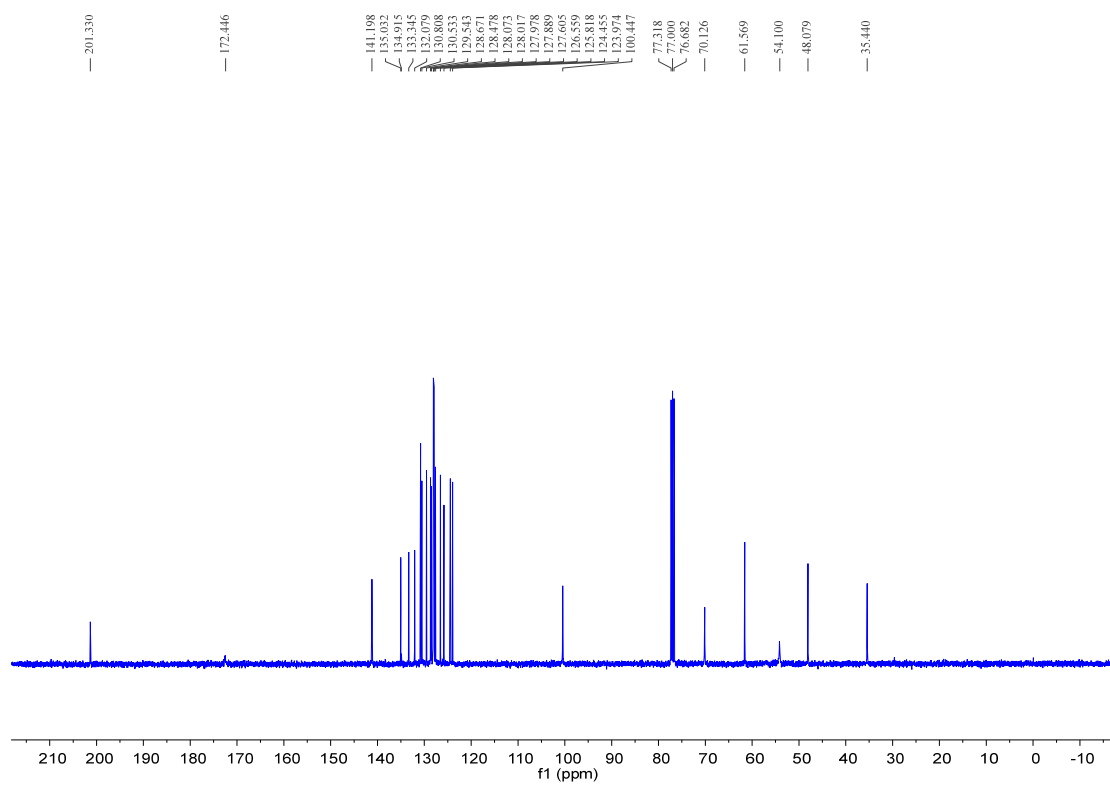

**$^1\text{H}$  and  $^{13}\text{C}$  NMR Spectra for Compound 4gb:** $^1\text{H}$  NMR (400 MHz,  $\text{CDCl}_3$ )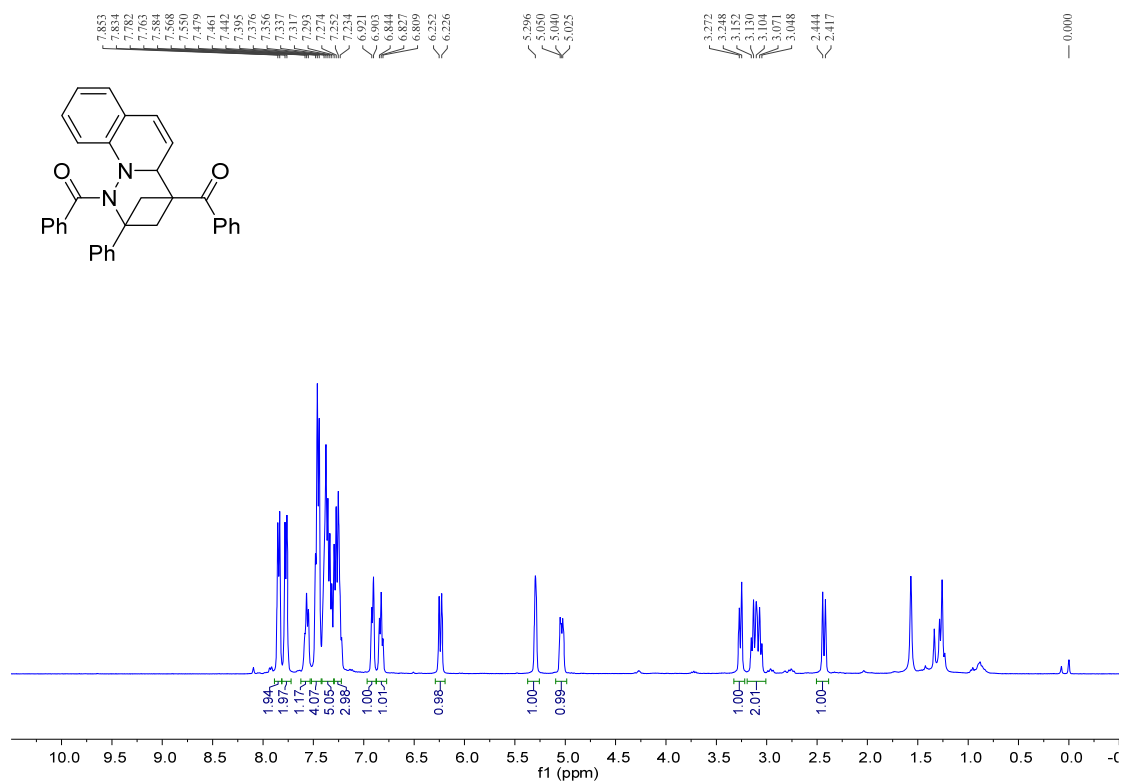 $^{13}\text{C}$  NMR (100 MHz,  $\text{CDCl}_3$ )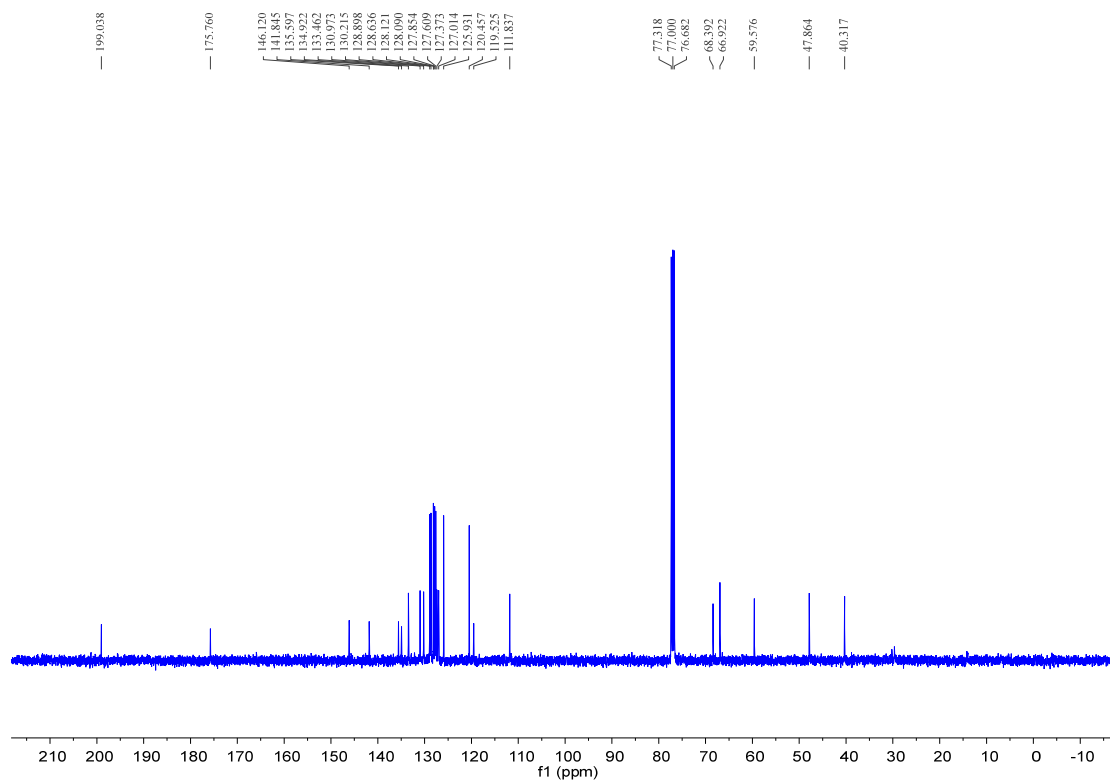

**<sup>1</sup>H and <sup>13</sup>C NMR Spectra for Compound 3qa:****<sup>1</sup>H NMR (400 MHz, CDCl<sub>3</sub>)**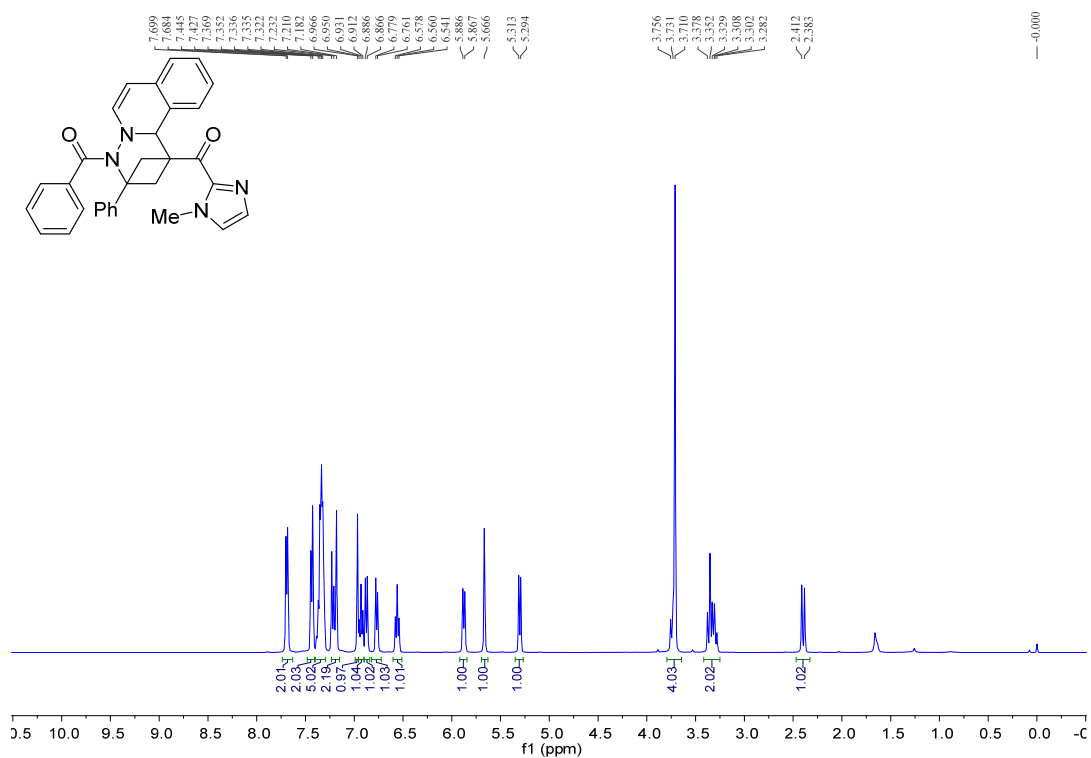**<sup>13</sup>C NMR (100 MHz, CDCl<sub>3</sub>)**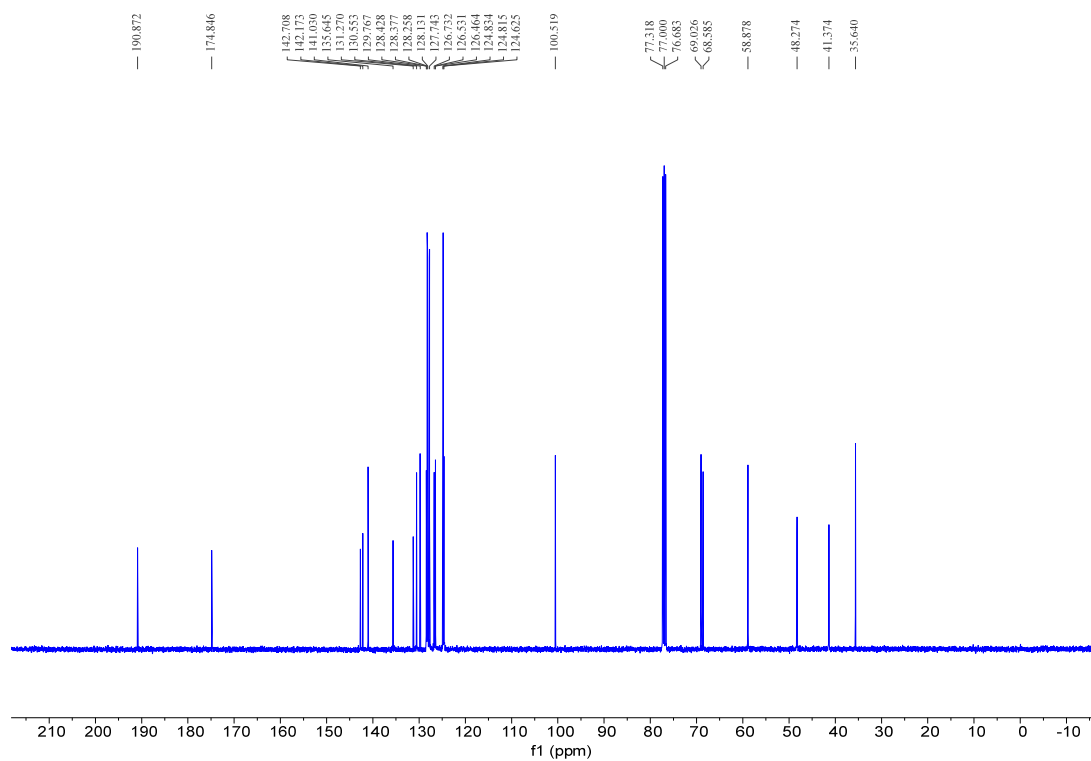

**<sup>1</sup>H and <sup>13</sup>C NMR Spectra for Compound 3ra:****<sup>1</sup>H NMR (400 MHz, CDCl<sub>3</sub>)**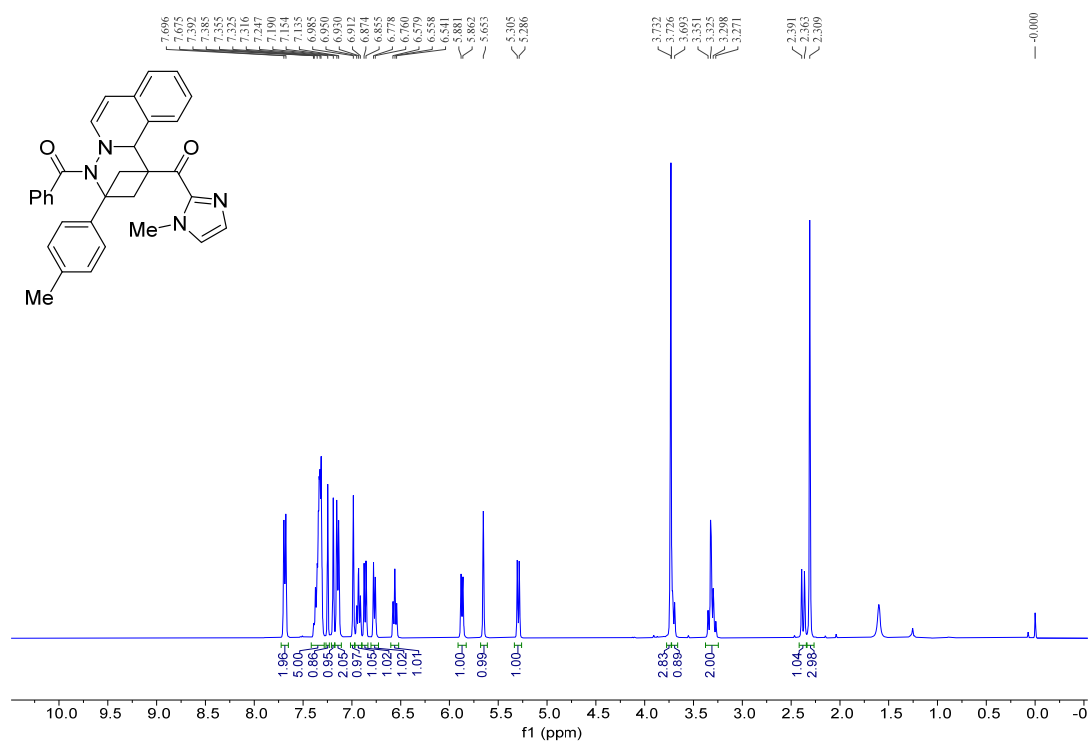**<sup>13</sup>C NMR (100 MHz, CDCl<sub>3</sub>)**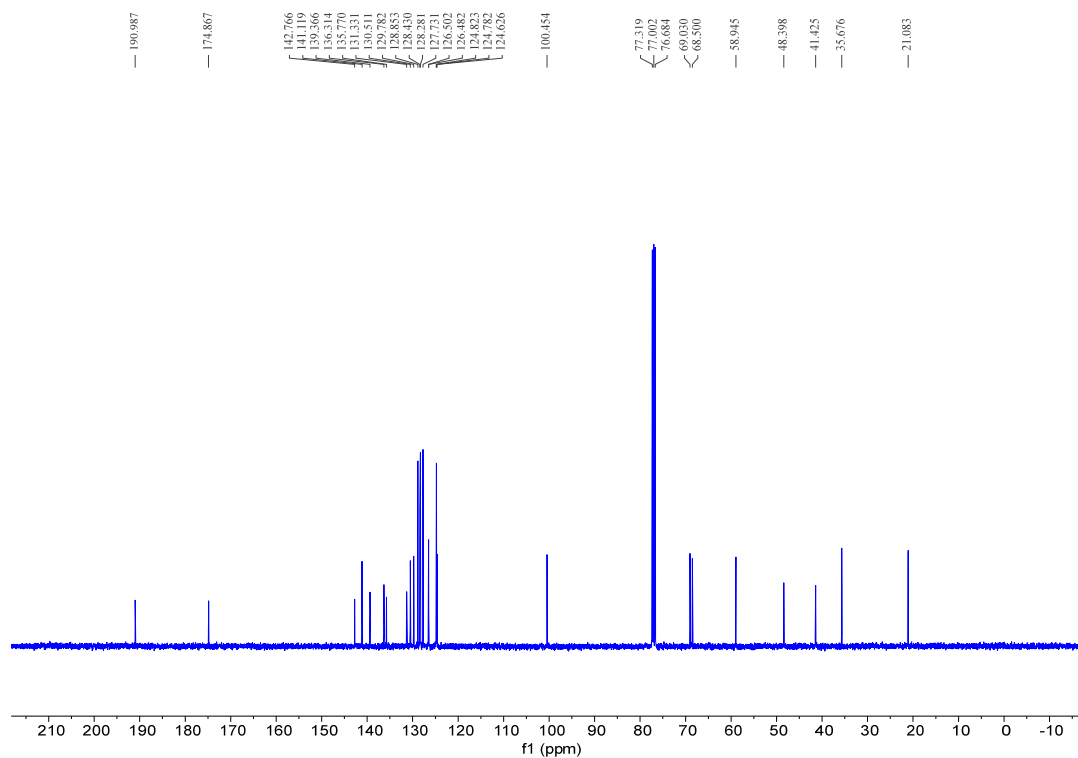

**$^1\text{H}$ ,  $^{13}\text{C}$  and  $^{19}\text{F}$  NMR Spectra for Compound 3sa:** **$^1\text{H}$  NMR (400 MHz,  $\text{CDCl}_3$ )**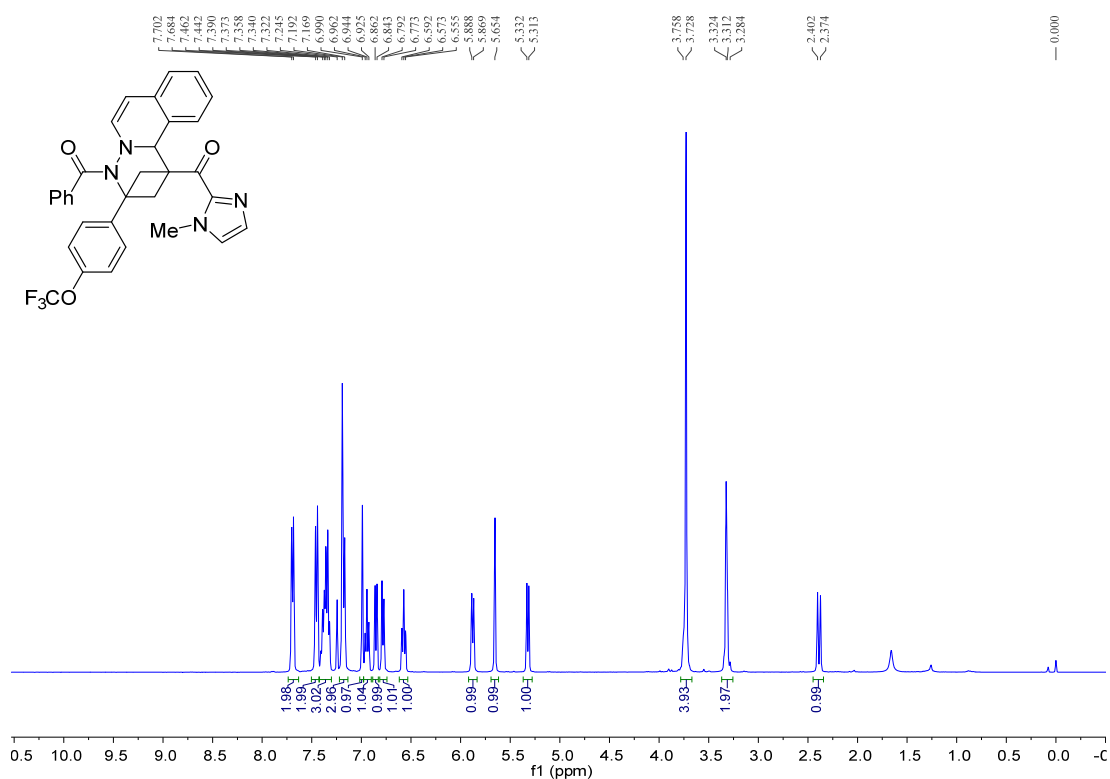 **$^{13}\text{C}$  NMR (100 MHz,  $\text{CDCl}_3$ )**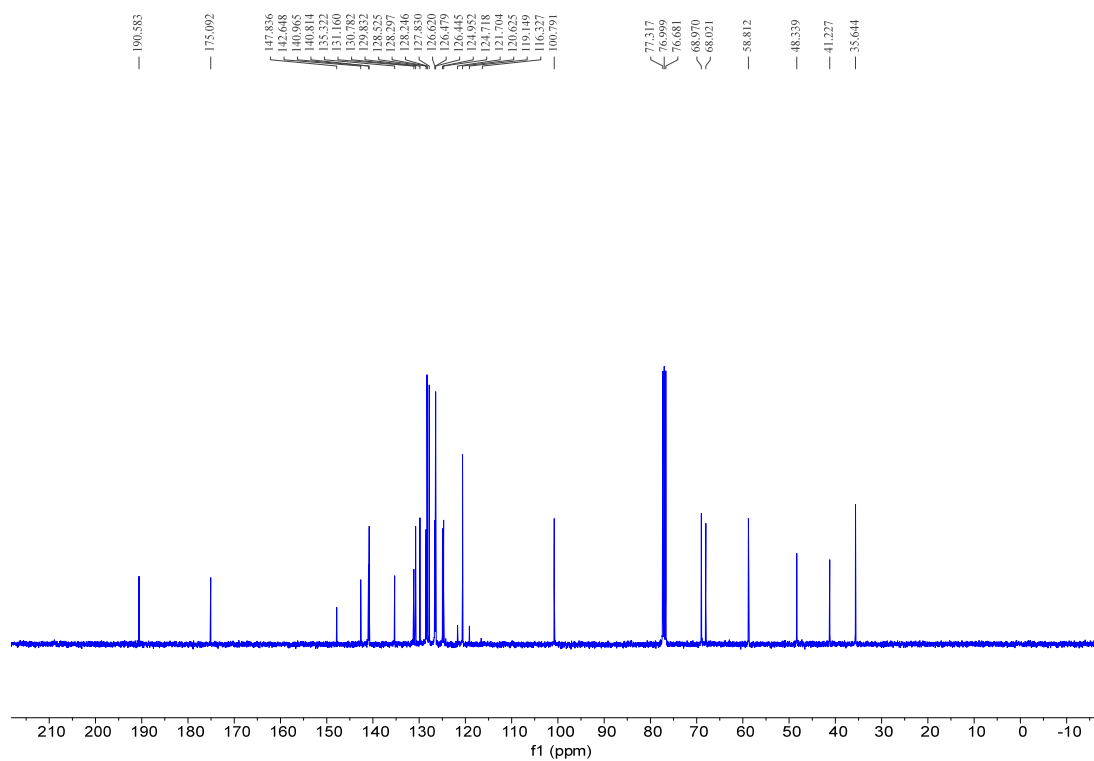

$^{19}\text{F}$  NMR (376 MHz,  $\text{CDCl}_3$ )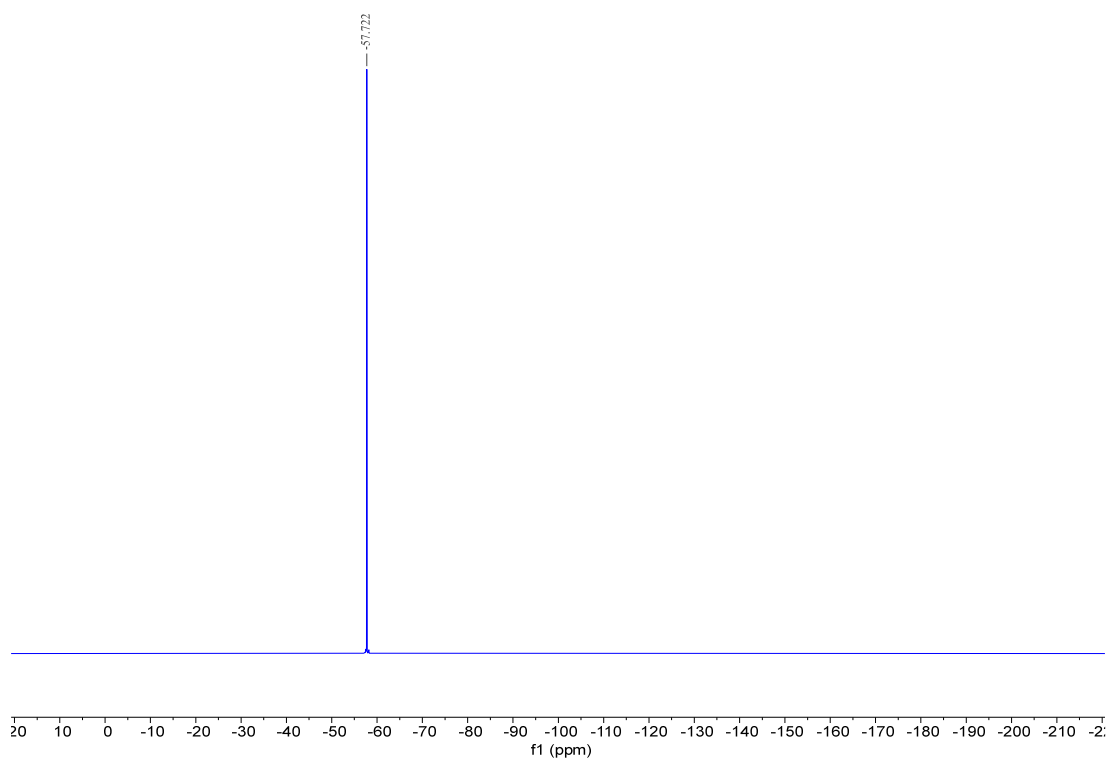 $^1\text{H}$ ,  $^{13}\text{C}$  and  $^{19}\text{F}$  NMR Spectra for Compound 3ta: $^1\text{H}$  NMR (400 MHz,  $\text{CDCl}_3$ )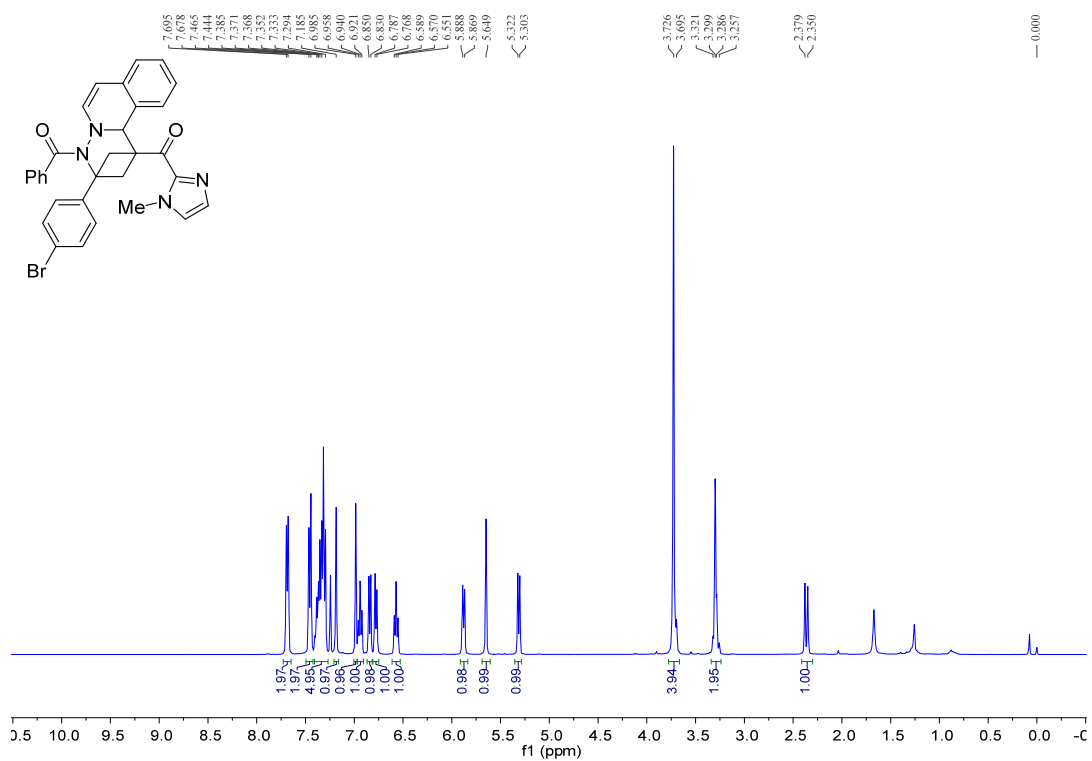

$^{13}\text{C}$  NMR (100 MHz,  $\text{CDCl}_3$ )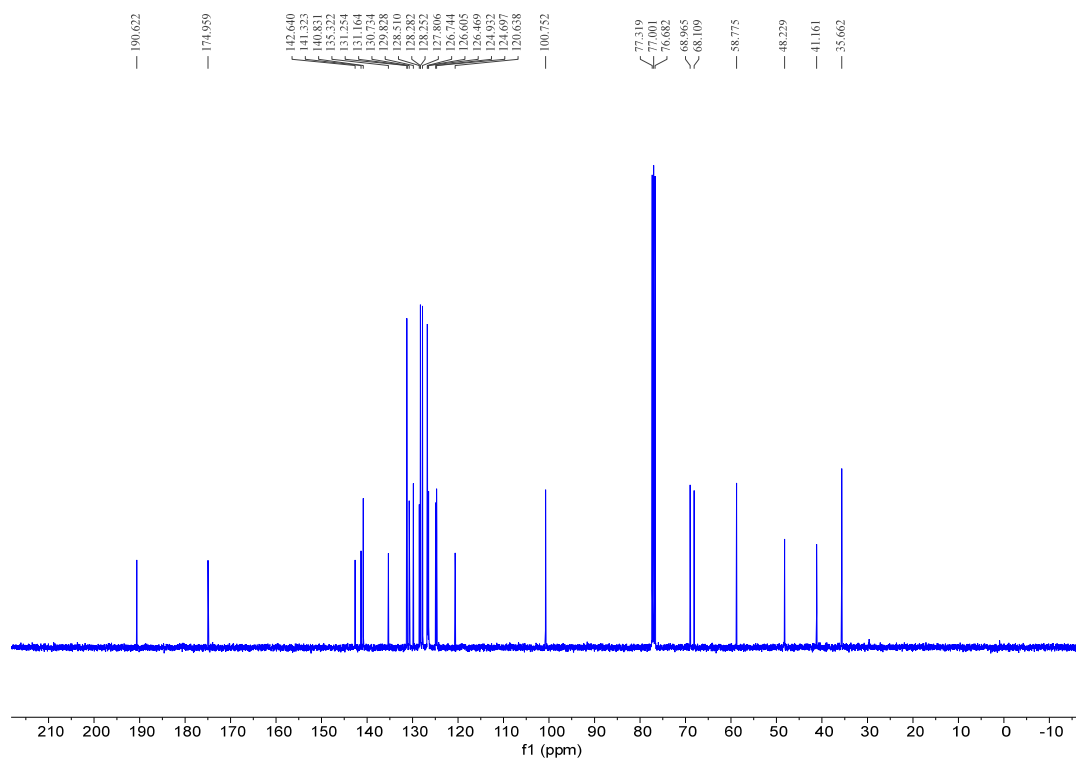 $^1\text{H}$ ,  $^{13}\text{C}$  and  $^{19}\text{F}$  NMR Spectra for Compound 3ua: $^1\text{H}$  NMR (400 MHz,  $\text{CDCl}_3$ )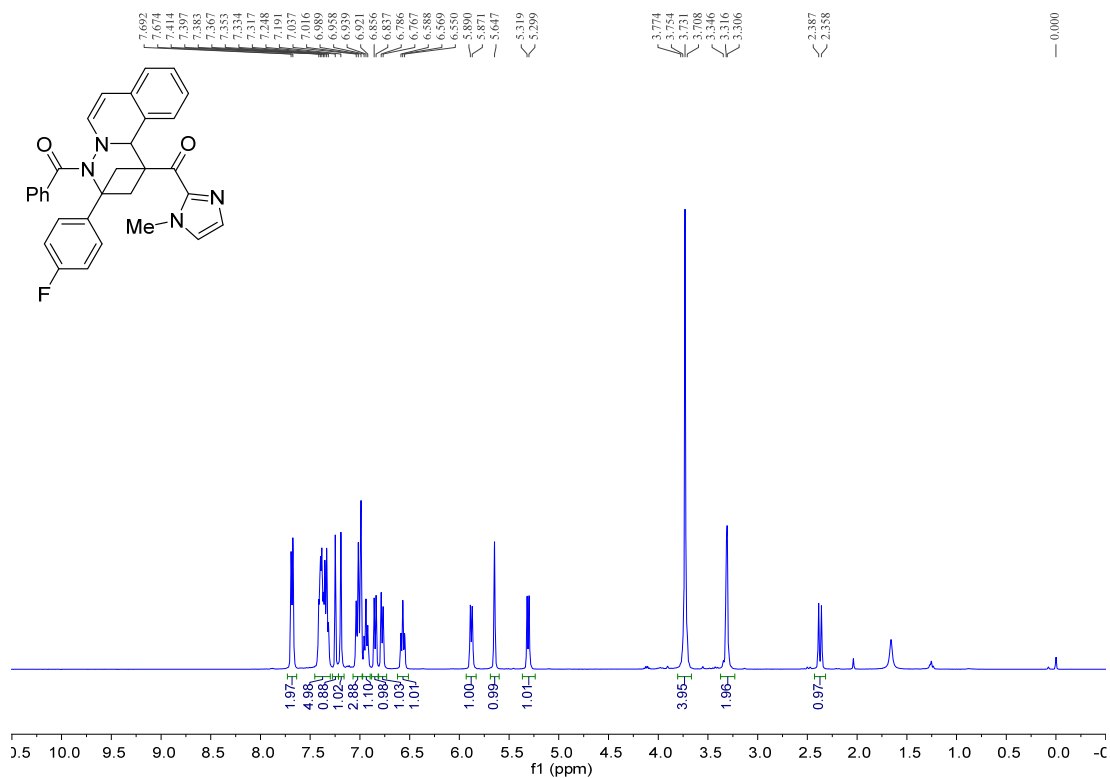



$^{13}\text{C}$  NMR (100 MHz,  $\text{CDCl}_3$ )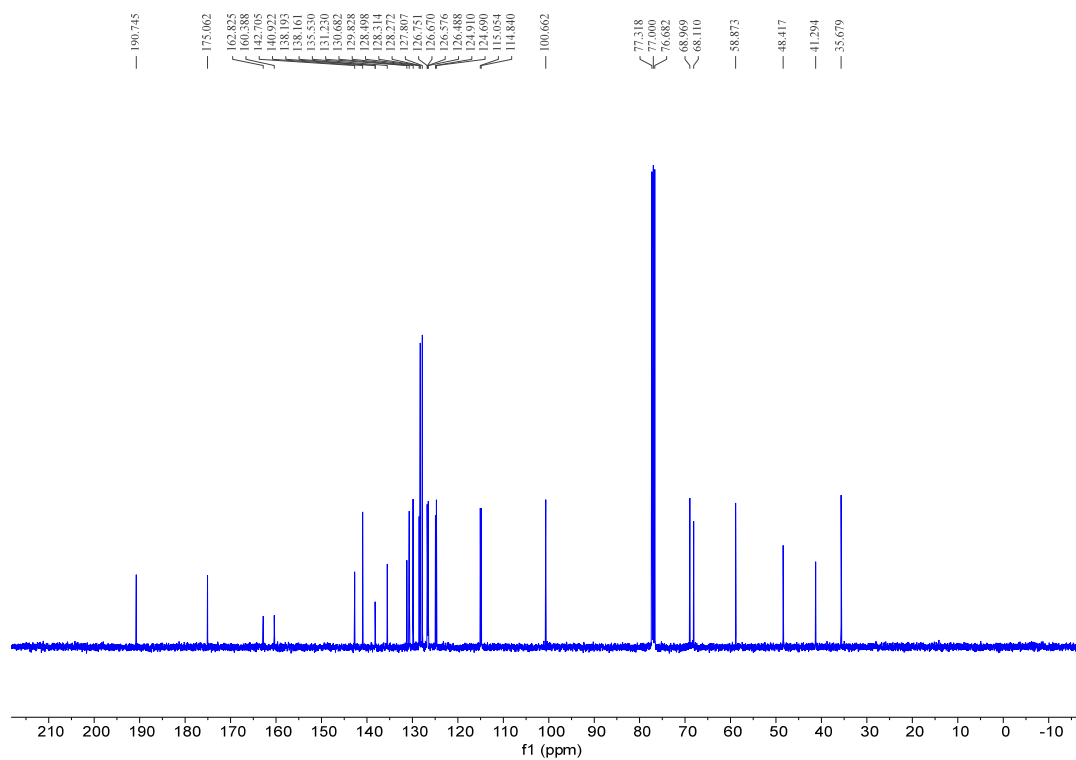 $^{19}\text{F}$  NMR (376 MHz,  $\text{CDCl}_3$ )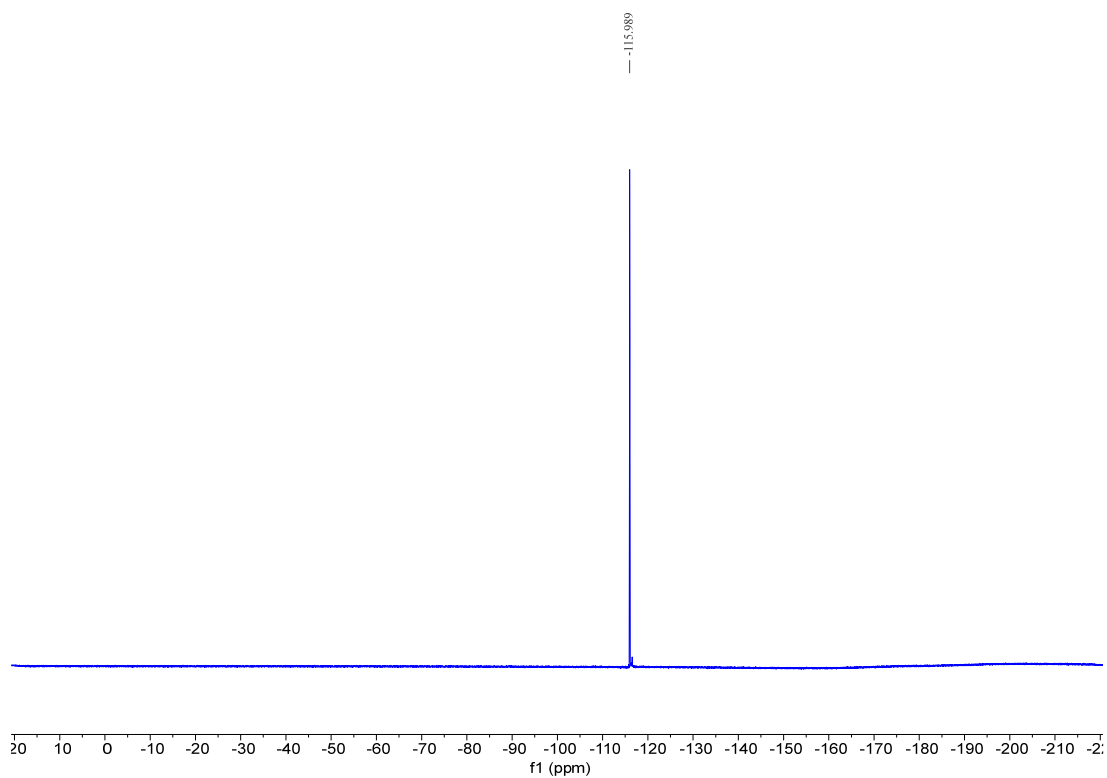

**<sup>1</sup>H and <sup>13</sup>C NMR Spectra for Compound 3va:****<sup>1</sup>H NMR (400 MHz, CDCl<sub>3</sub>)**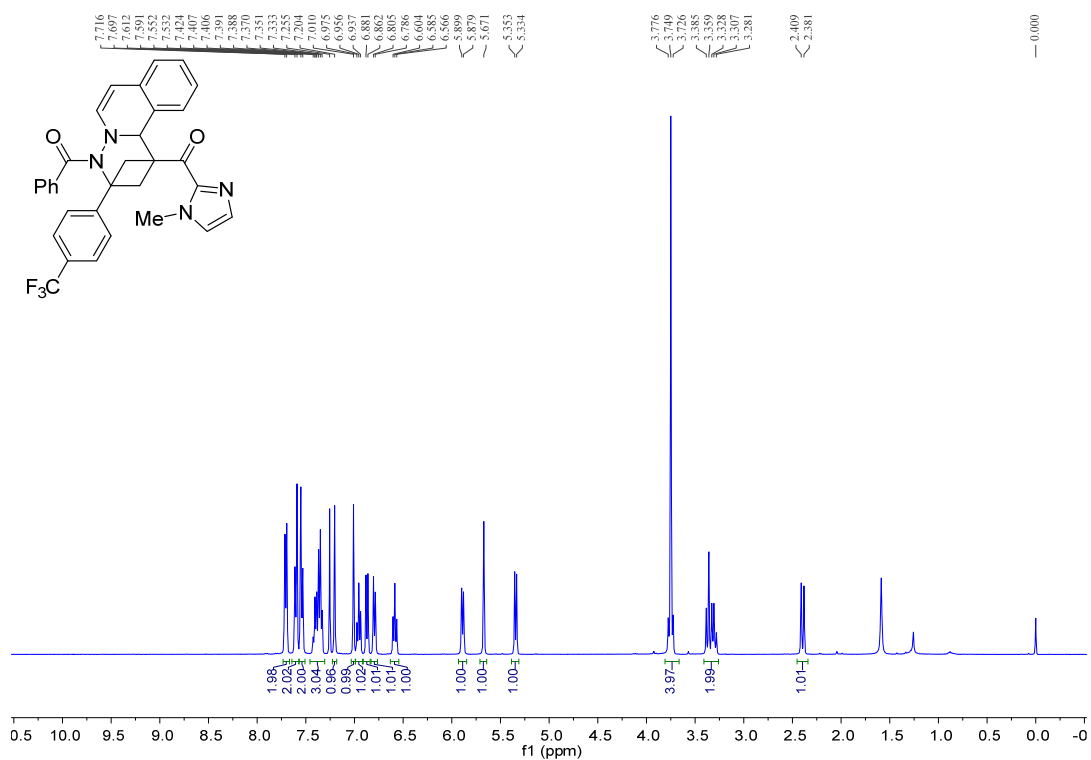**<sup>13</sup>C NMR (100 MHz, CDCl<sub>3</sub>)**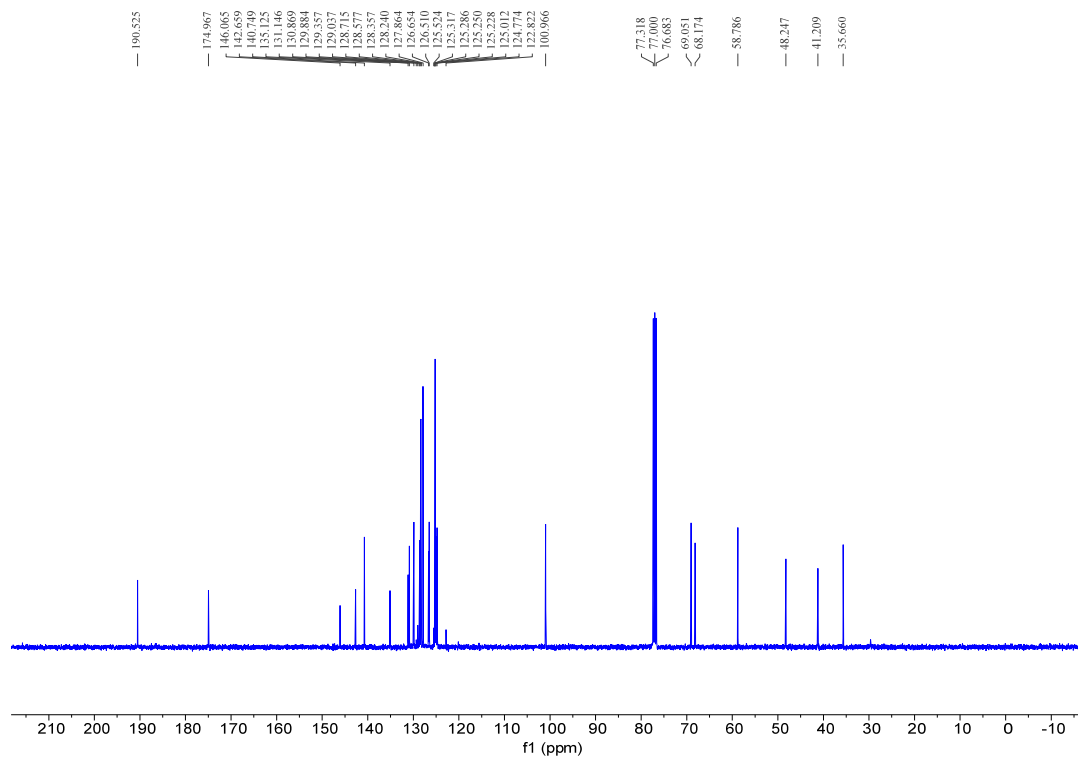

$^{19}\text{F}$  NMR (376 MHz,  $\text{CDCl}_3$ )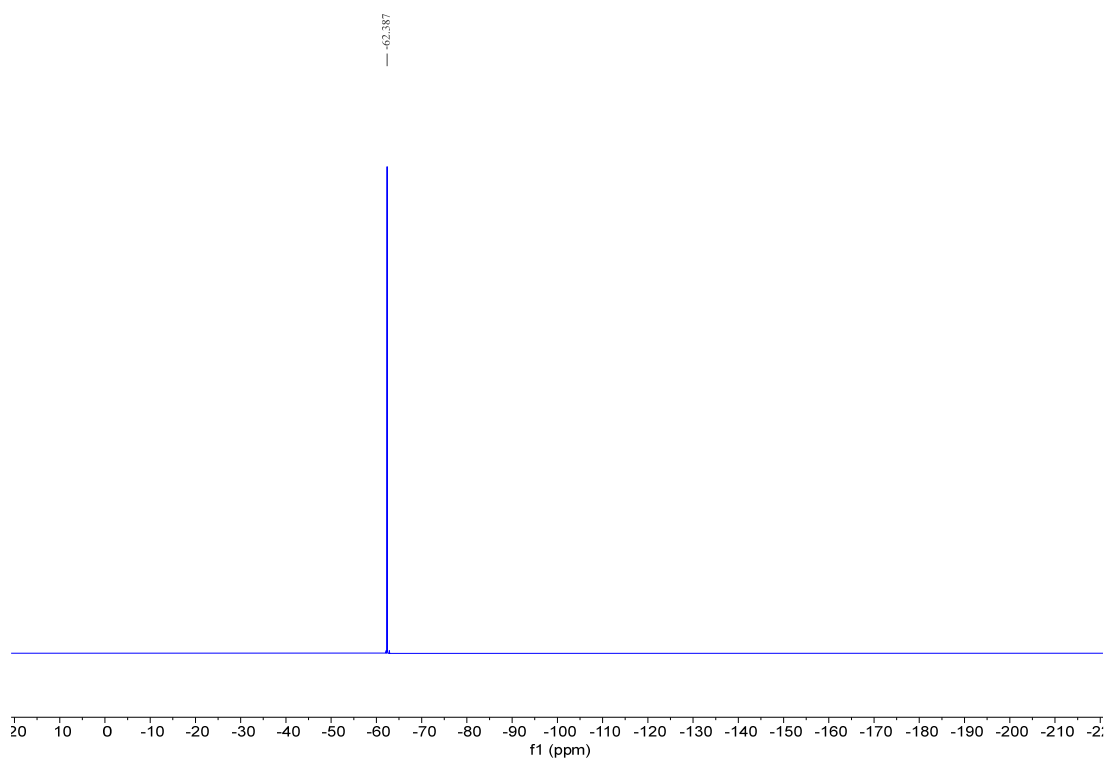 $^1\text{H}$  and  $^{13}\text{C}$  NMR Spectra for Compound 3wa: $^1\text{H}$  NMR (400 MHz,  $\text{CDCl}_3$ )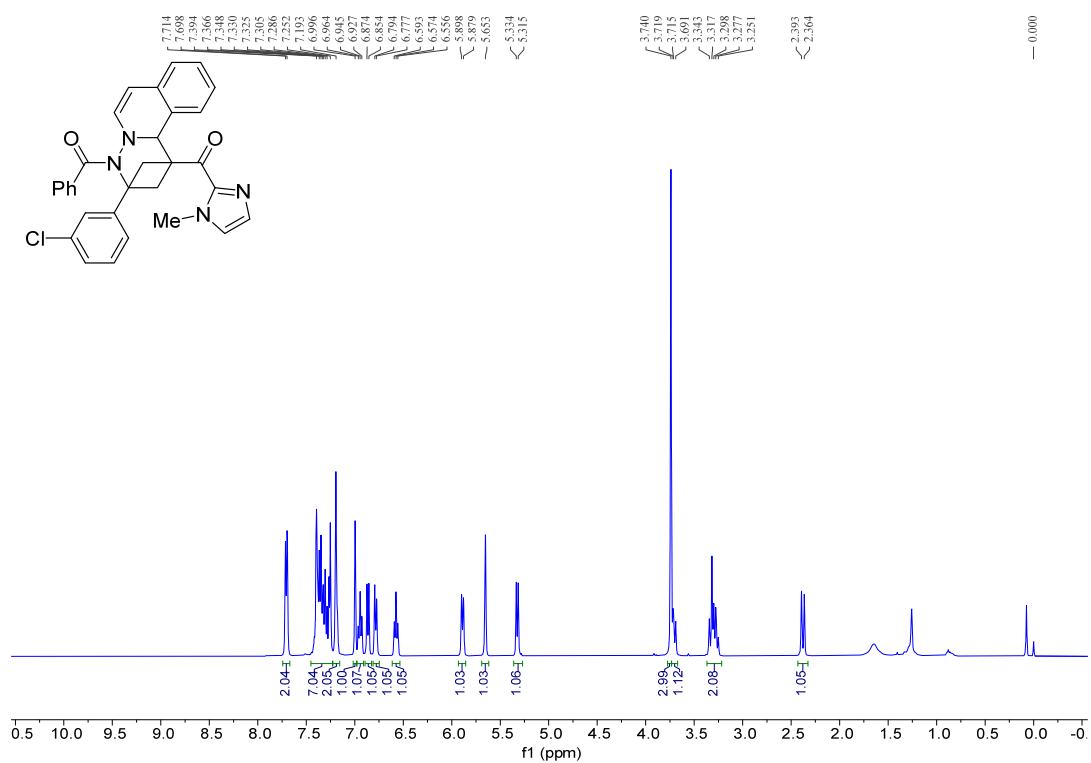

$^{13}\text{C}$  NMR (100 MHz,  $\text{CDCl}_3$ )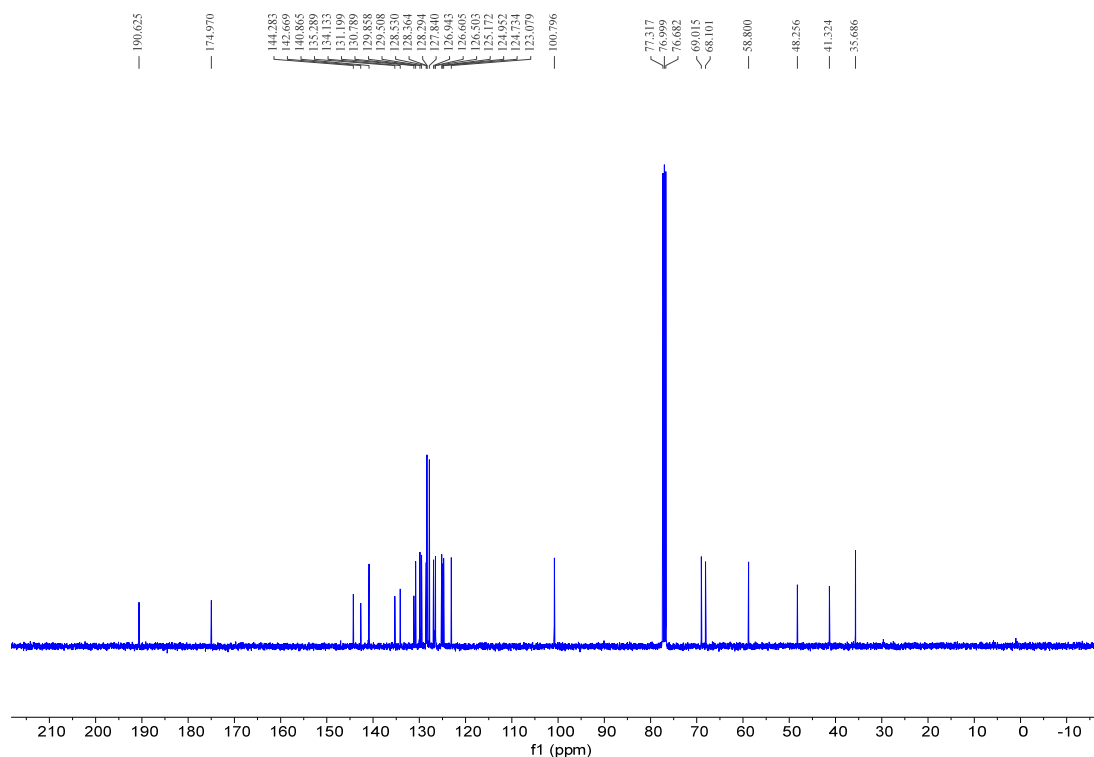 $^1\text{H}$  and  $^{13}\text{C}$  NMR Spectra for Compound 3a: $^1\text{H}$  NMR (400 MHz,  $\text{CDCl}_3$ )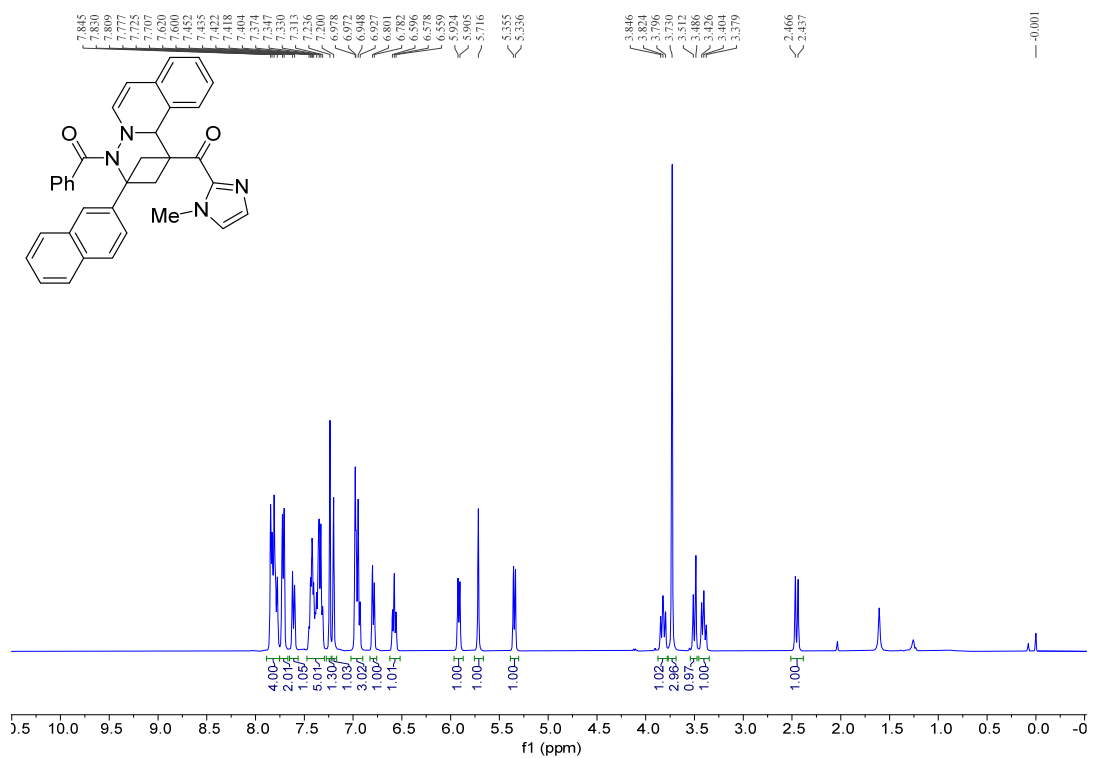

$^{13}\text{C}$  NMR (100 MHz,  $\text{CDCl}_3$ )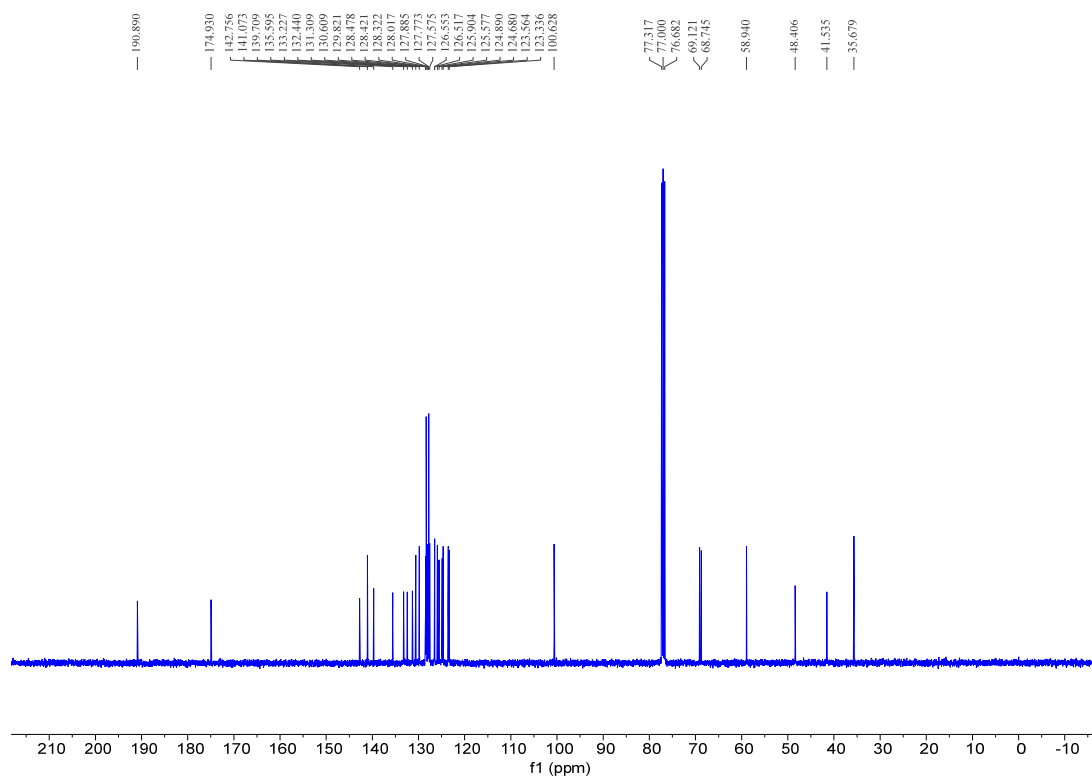 $^1\text{H}$ ,  $^{13}\text{C}$  and  $^{19}\text{F}$  NMR Spectra for Compound 3qd: $^1\text{H}$  NMR (400 MHz,  $\text{CDCl}_3$ )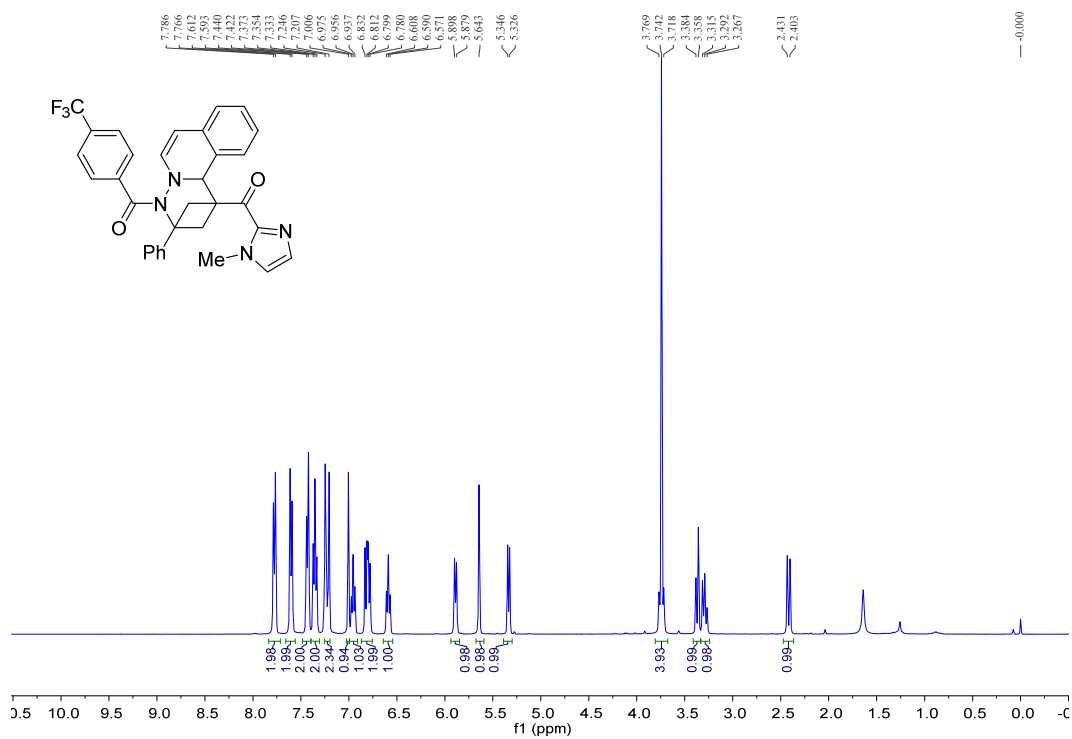

$^{13}\text{C}$  NMR (100 MHz,  $\text{CDCl}_3$ )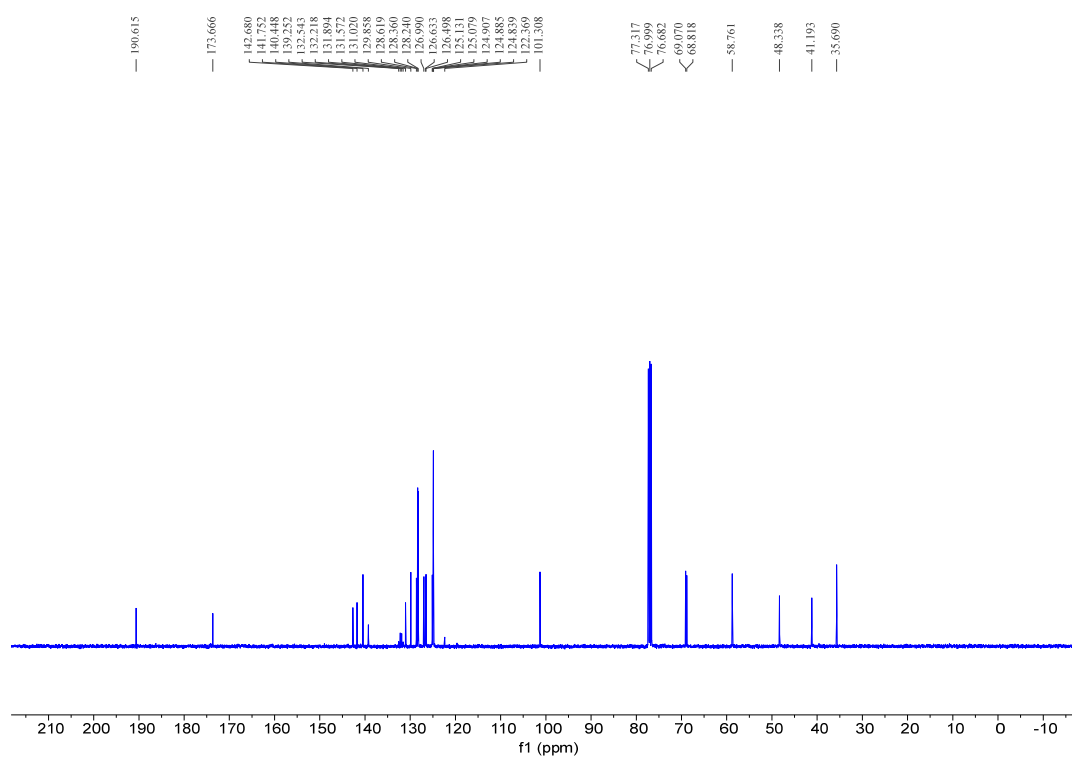 $^{19}\text{F}$  NMR (376 MHz,  $\text{CDCl}_3$ )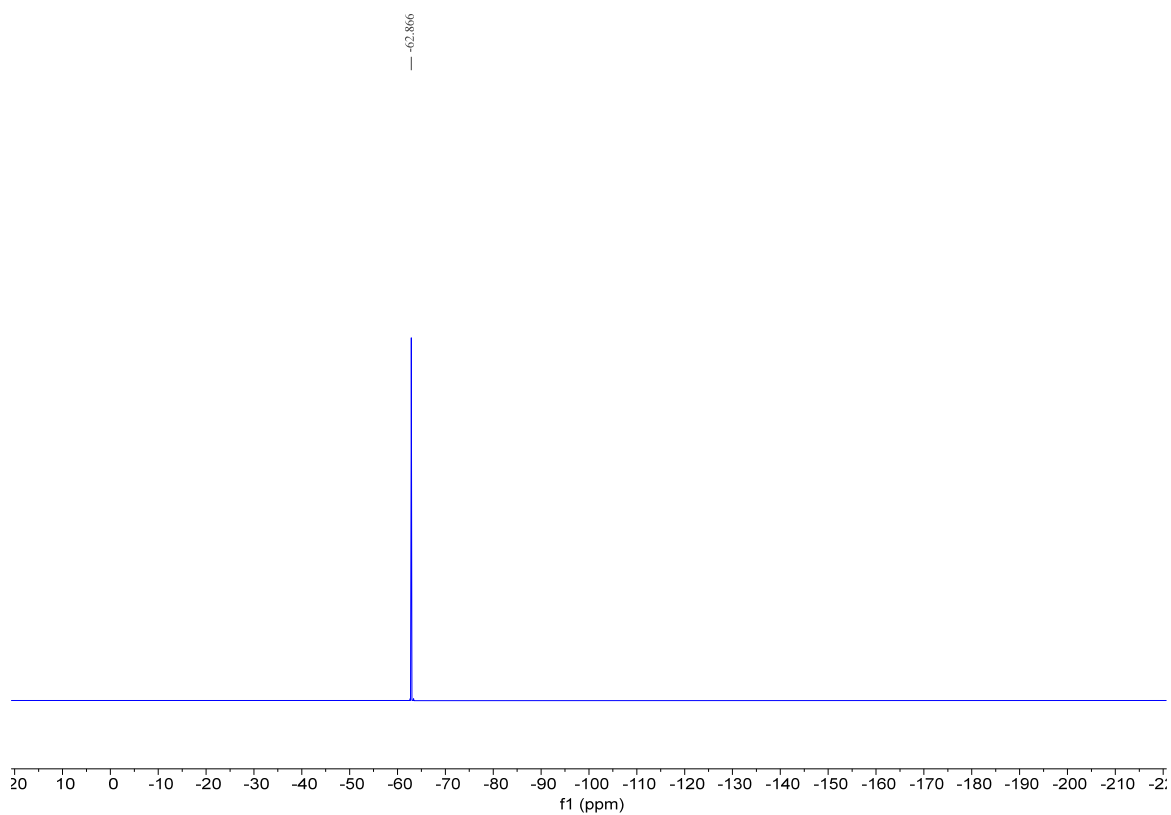

**$^1\text{H}$  and  $^{13}\text{C}$  NMR Spectra for Compound 3qe:** $^1\text{H}$  NMR (400 MHz,  $\text{CDCl}_3$ )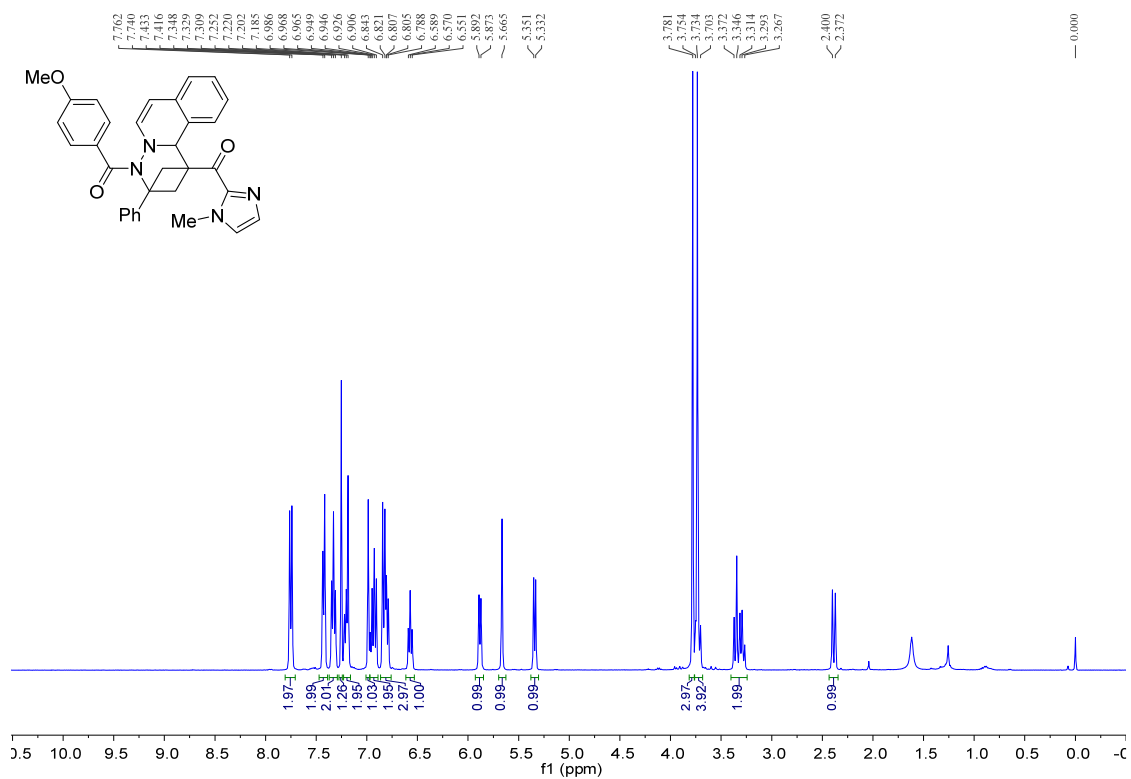 $^{13}\text{C}$  NMR (100 MHz,  $\text{CDCl}_3$ )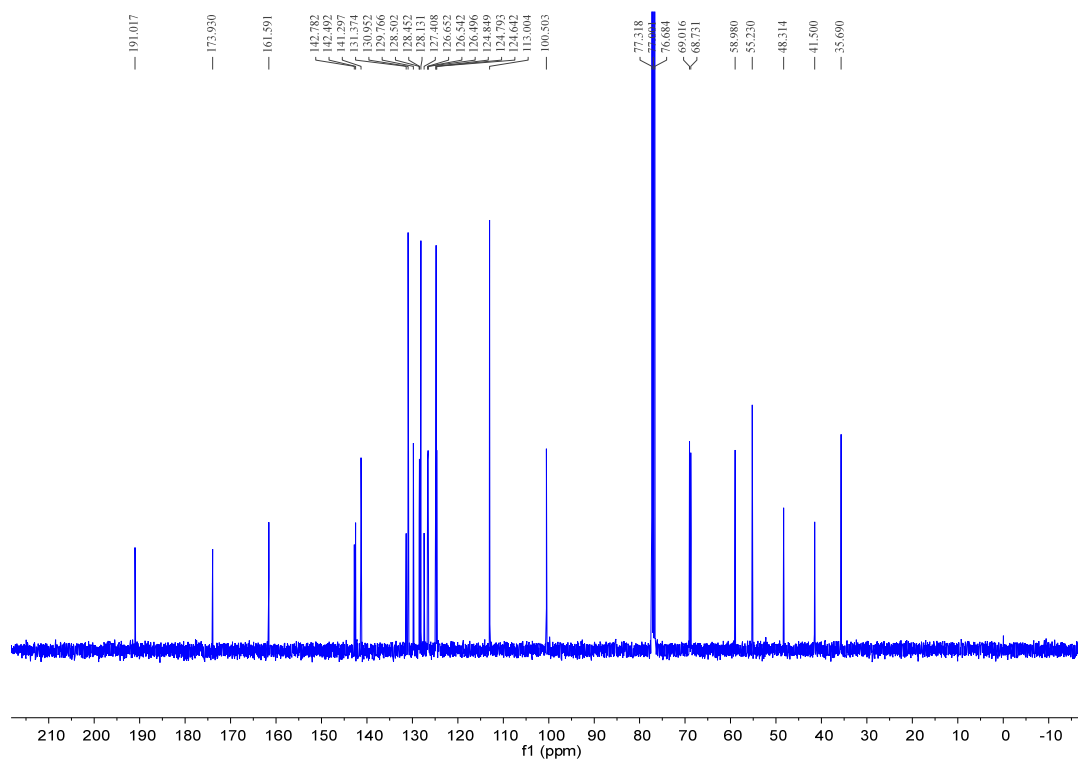

**$^1\text{H}$ ,  $^{13}\text{C}$  and  $^{19}\text{F}$  NMR Spectra for Compound 3qf:** **$^1\text{H}$  NMR (400 MHz,  $\text{CDCl}_3$ )**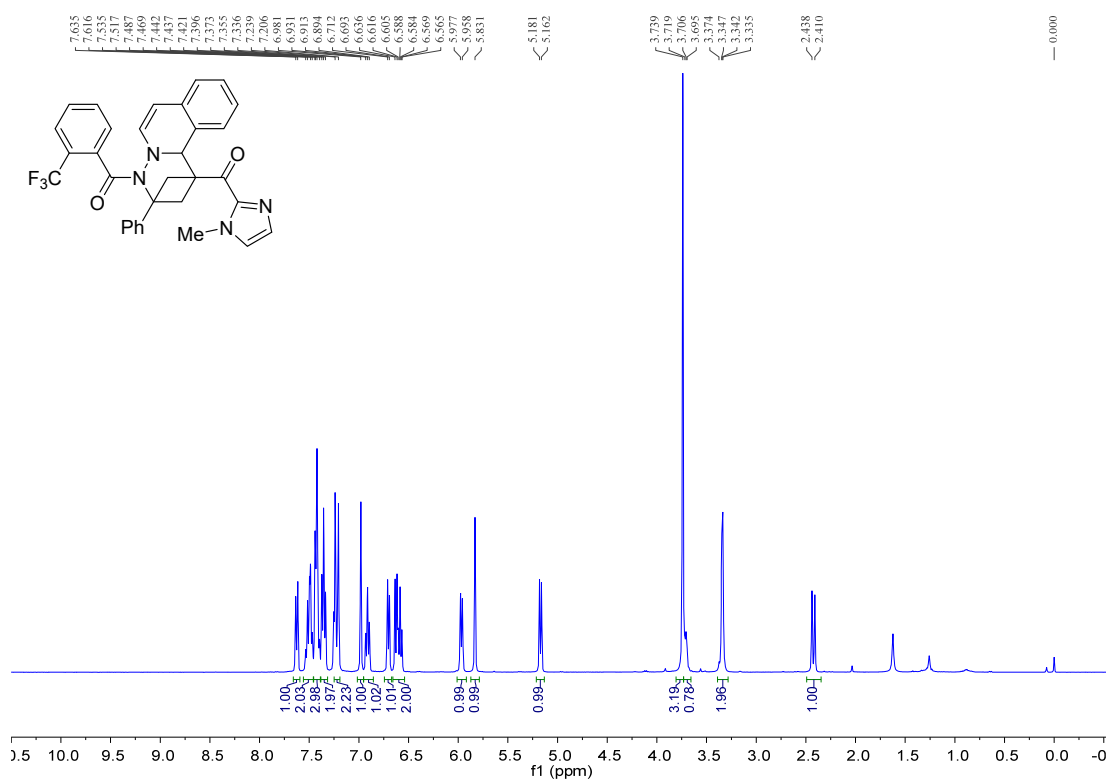 **$^{13}\text{C}$  NMR (100 MHz,  $\text{CDCl}_3$ )**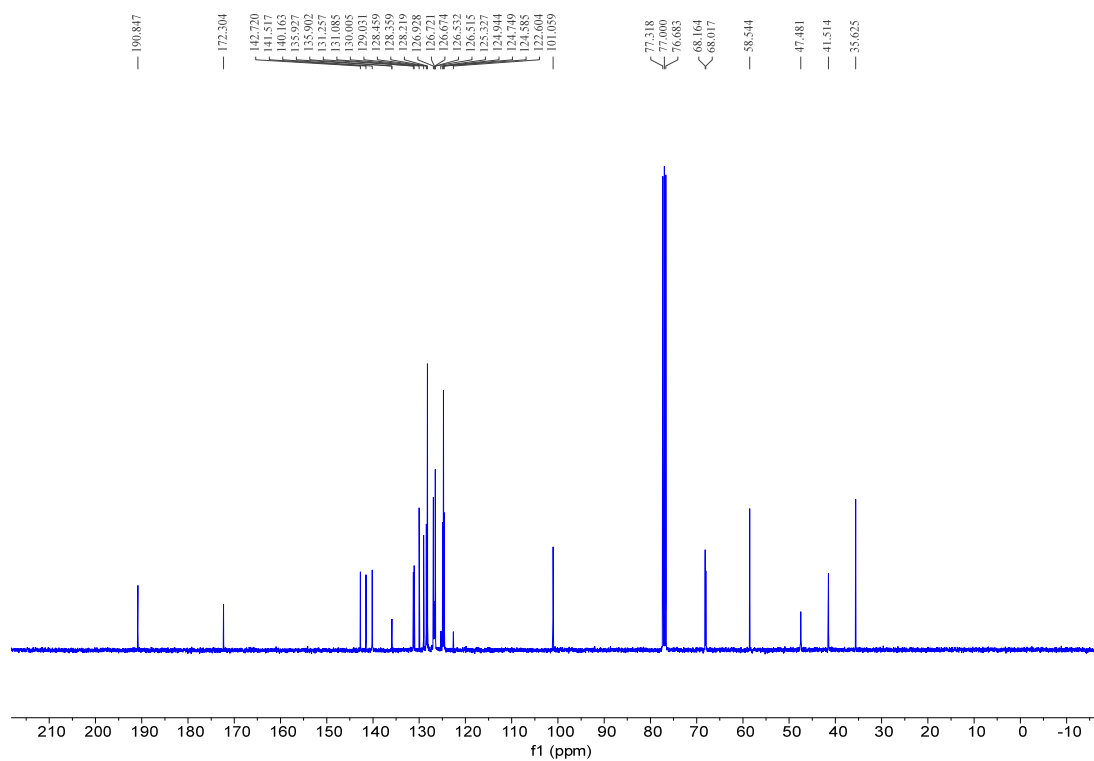



$^{19}\text{F}$  NMR (376 MHz,  $\text{CDCl}_3$ )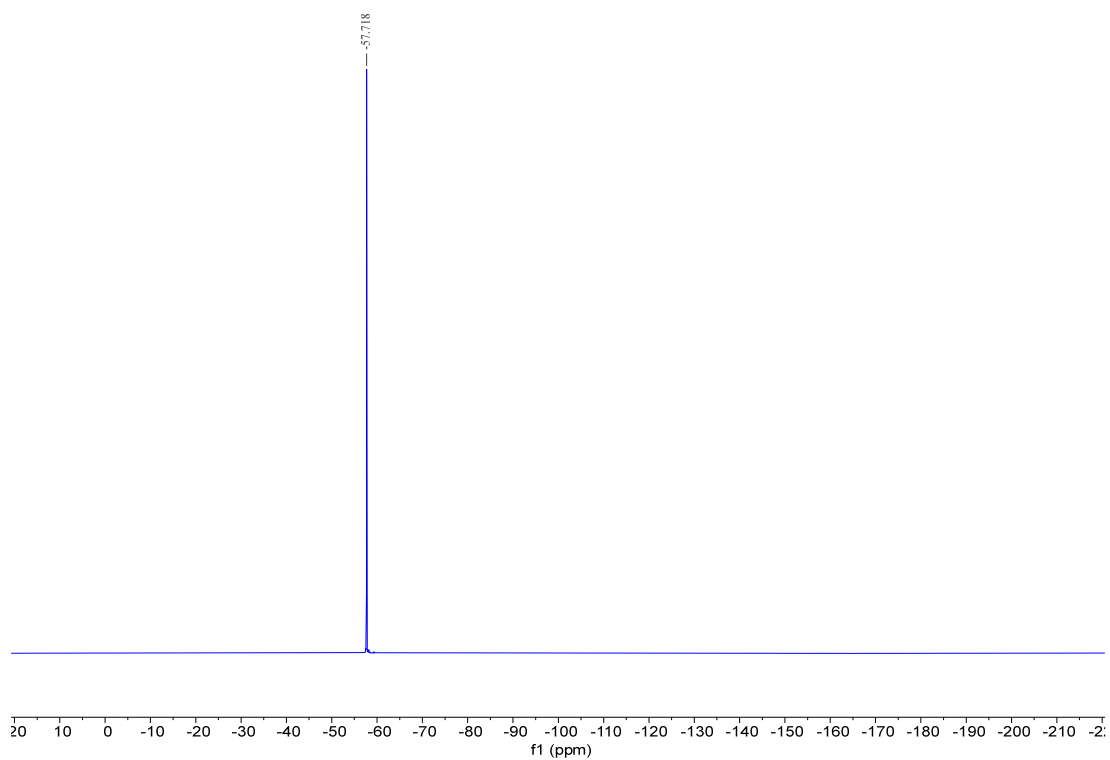 $^1\text{H}$  and  $^{13}\text{C}$  NMR Spectra for Compound 3qg: $^1\text{H}$  NMR (400 MHz,  $\text{CDCl}_3$ )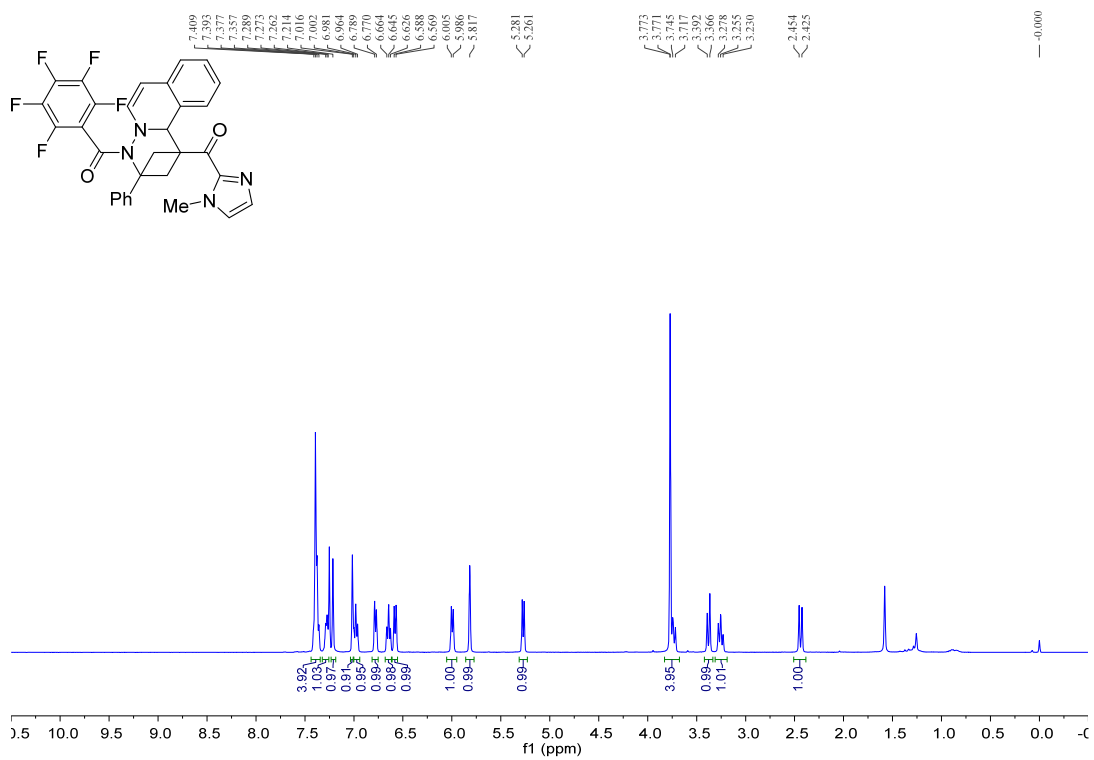

$^{13}\text{C}$  NMR (150 MHz,  $\text{CDCl}_3$ )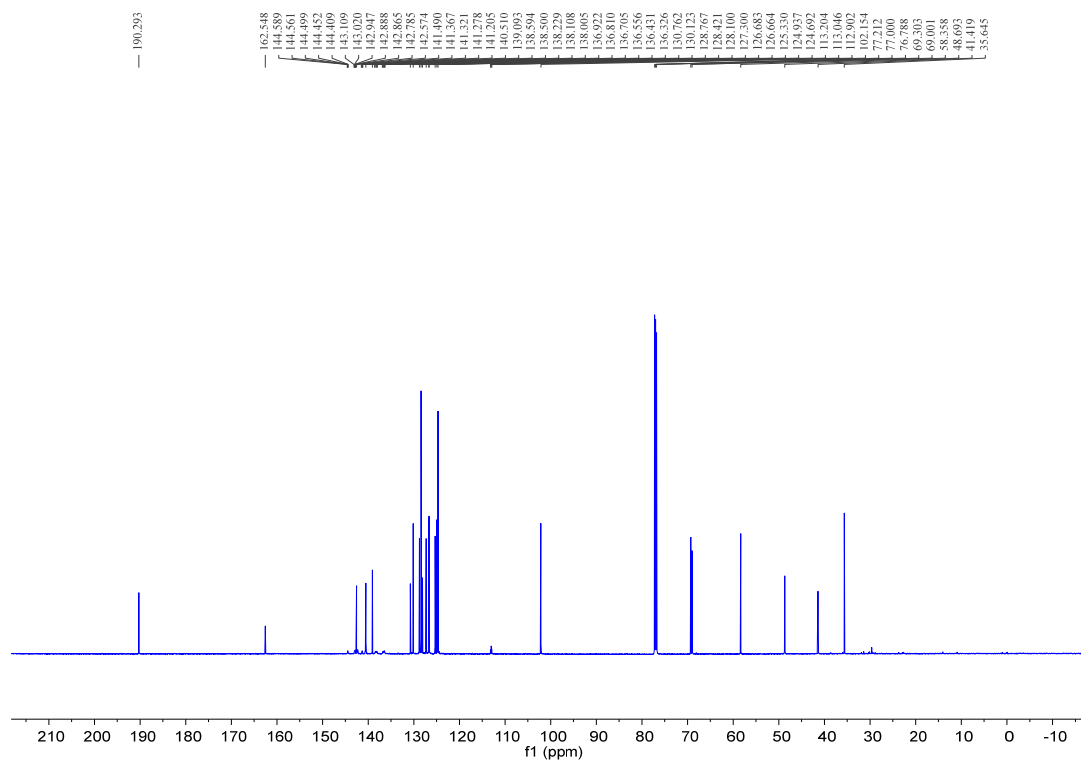 $^{19}\text{F}$  NMR (376 MHz,  $\text{CDCl}_3$ )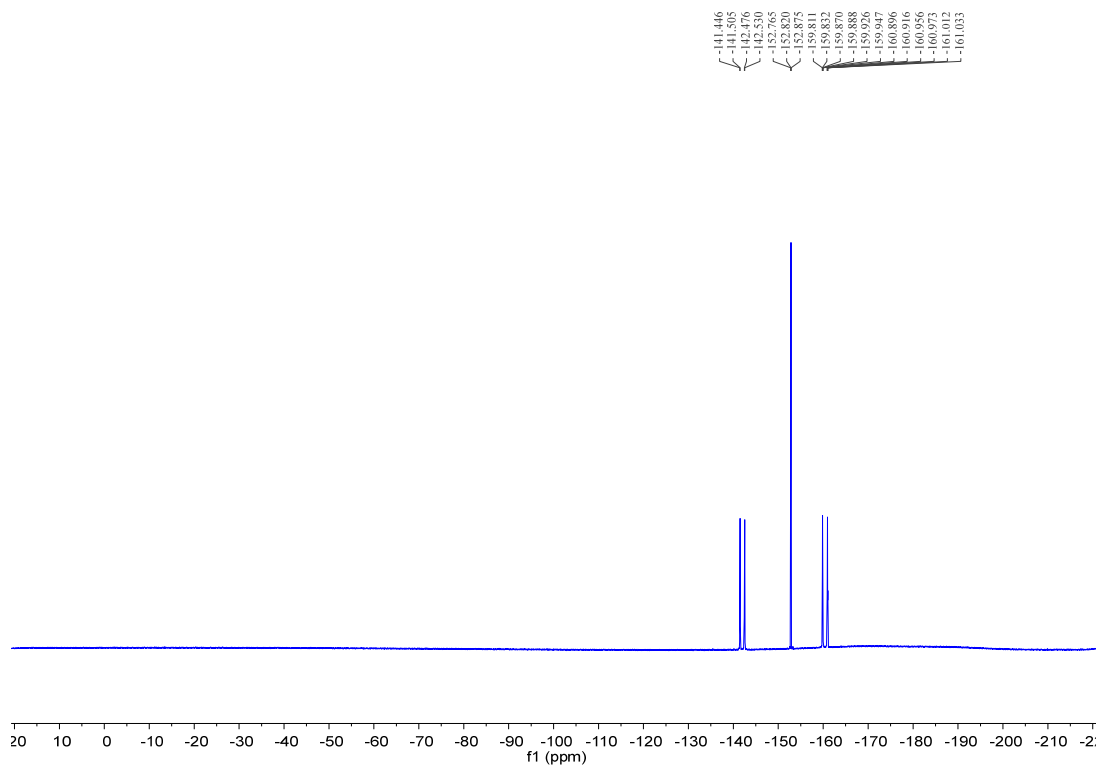

**$^1\text{H}$  and  $^{13}\text{C}$  NMR Spectra for Compound 3qh:** $^1\text{H}$  NMR (400 MHz,  $\text{CDCl}_3$ )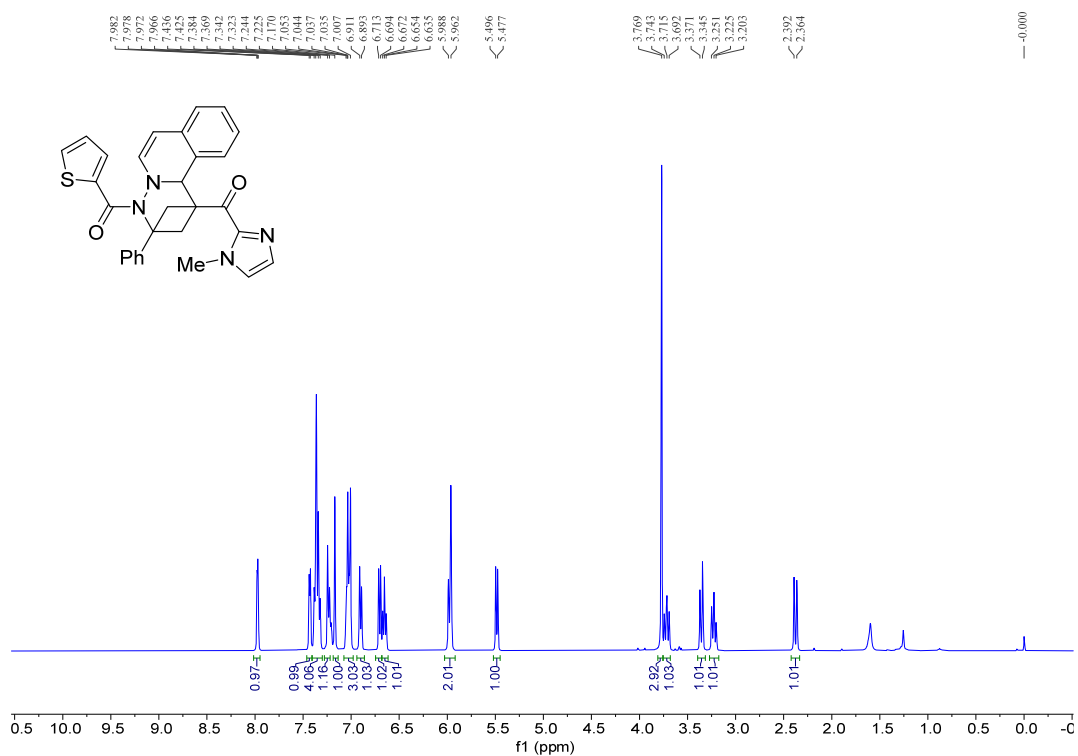 $^{13}\text{C}$  NMR (100 MHz,  $\text{CDCl}_3$ )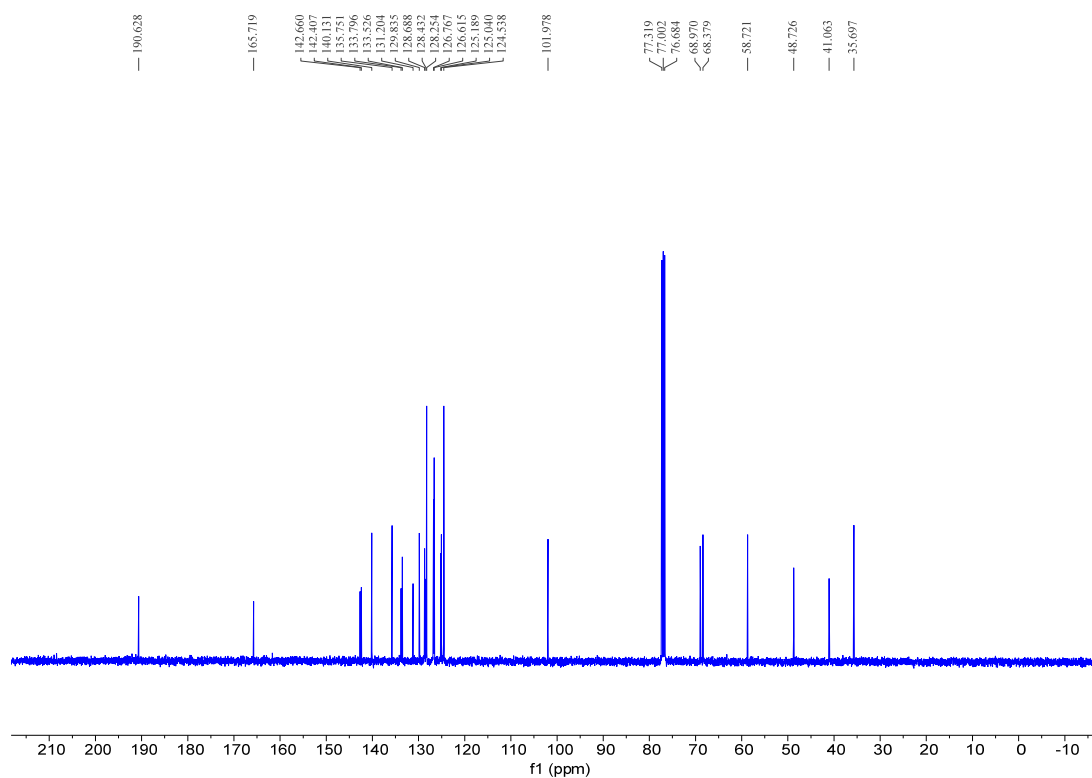

**$^1\text{H}$  and  $^{13}\text{C}$  NMR Spectra for Compound 3qi:** $^1\text{H}$  NMR (400 MHz,  $\text{CDCl}_3$ )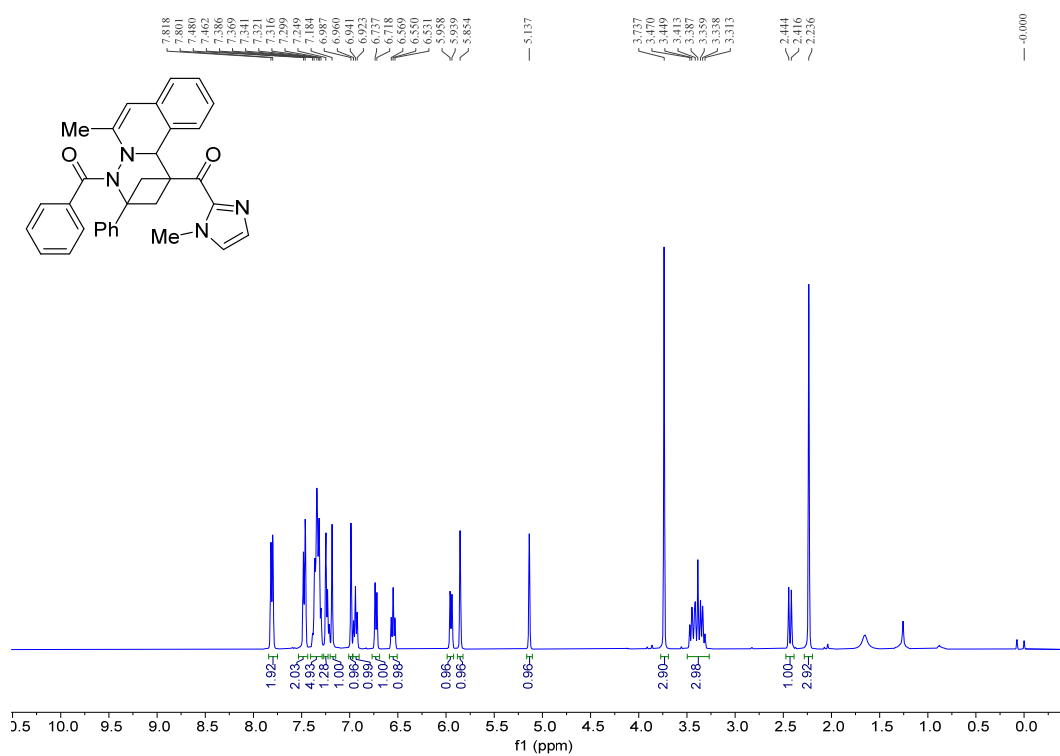 $^{13}\text{C}$  NMR (100 MHz,  $\text{CDCl}_3$ )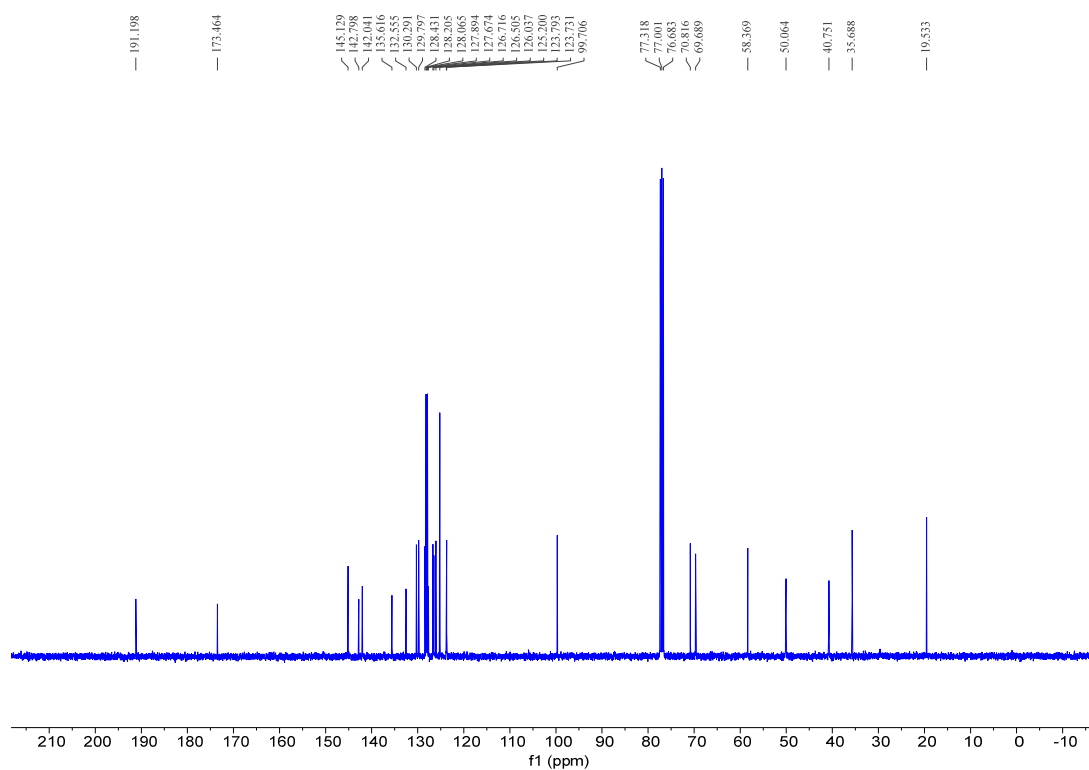

**<sup>1</sup>H and <sup>13</sup>C NMR Spectra for Compound 3qj:****<sup>1</sup>H NMR (400 MHz, CDCl<sub>3</sub>)**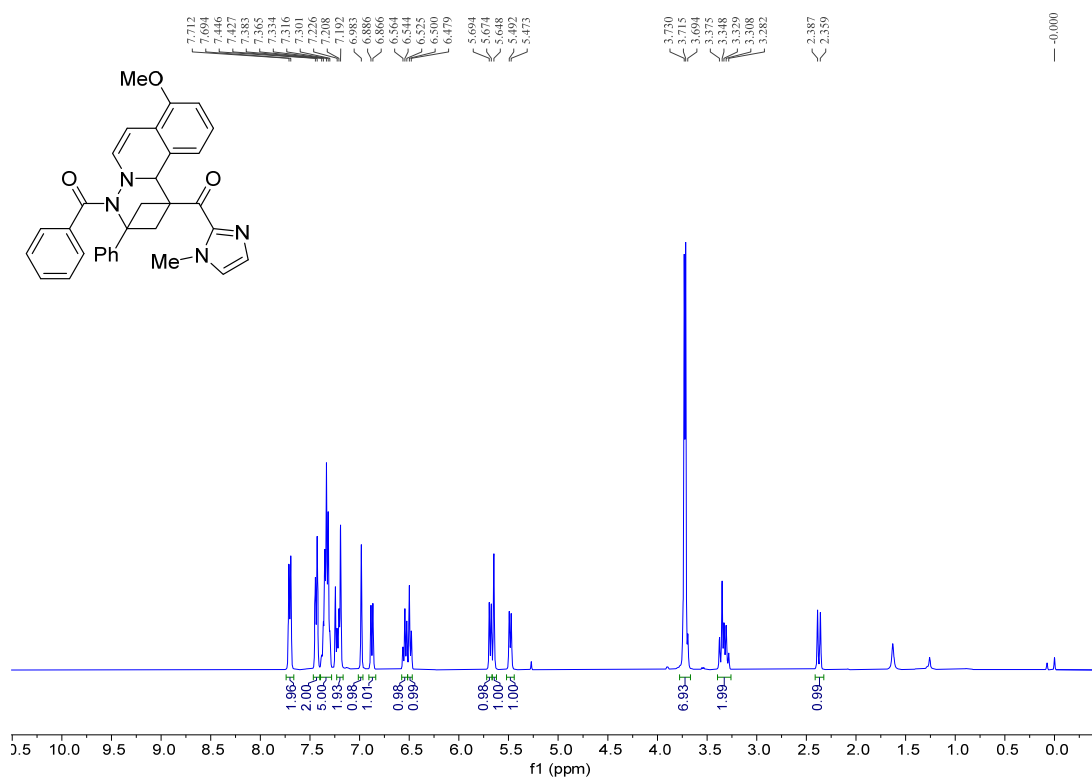**<sup>13</sup>C NMR (100 MHz, CDCl<sub>3</sub>)**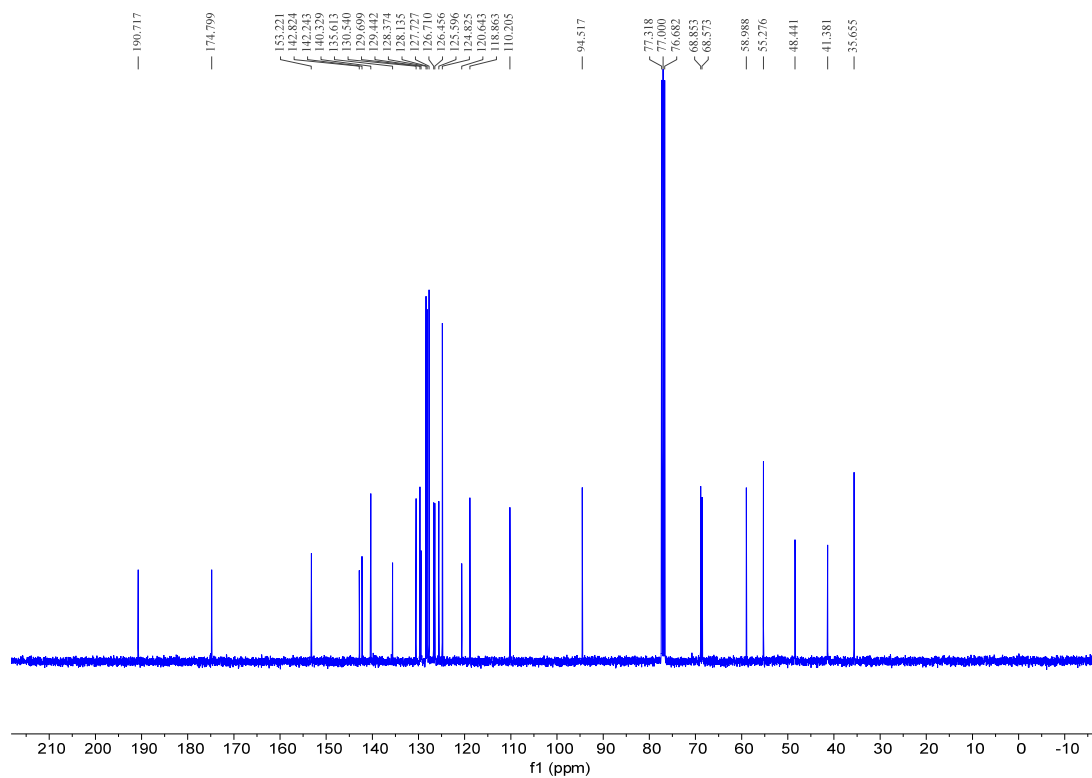

**<sup>1</sup>H and <sup>13</sup>C NMR Spectra for Compound 3qk:****<sup>1</sup>H NMR (400 MHz, CDCl<sub>3</sub>)**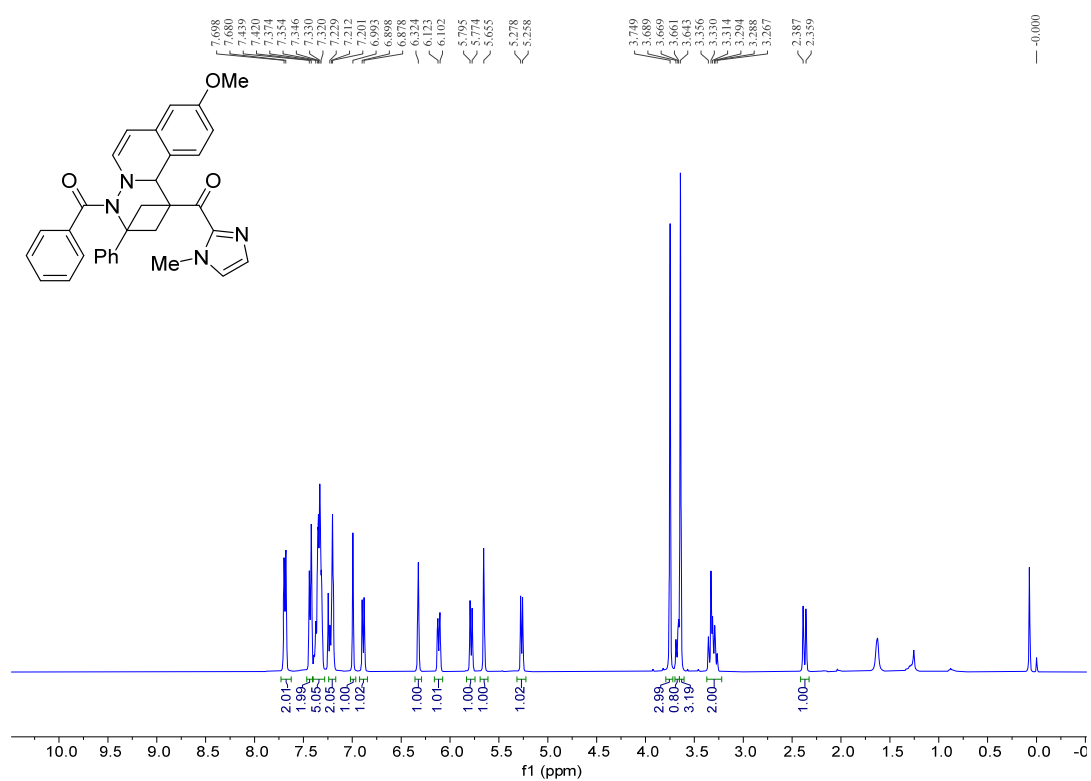**<sup>13</sup>C NMR (100 MHz, CDCl<sub>3</sub>)**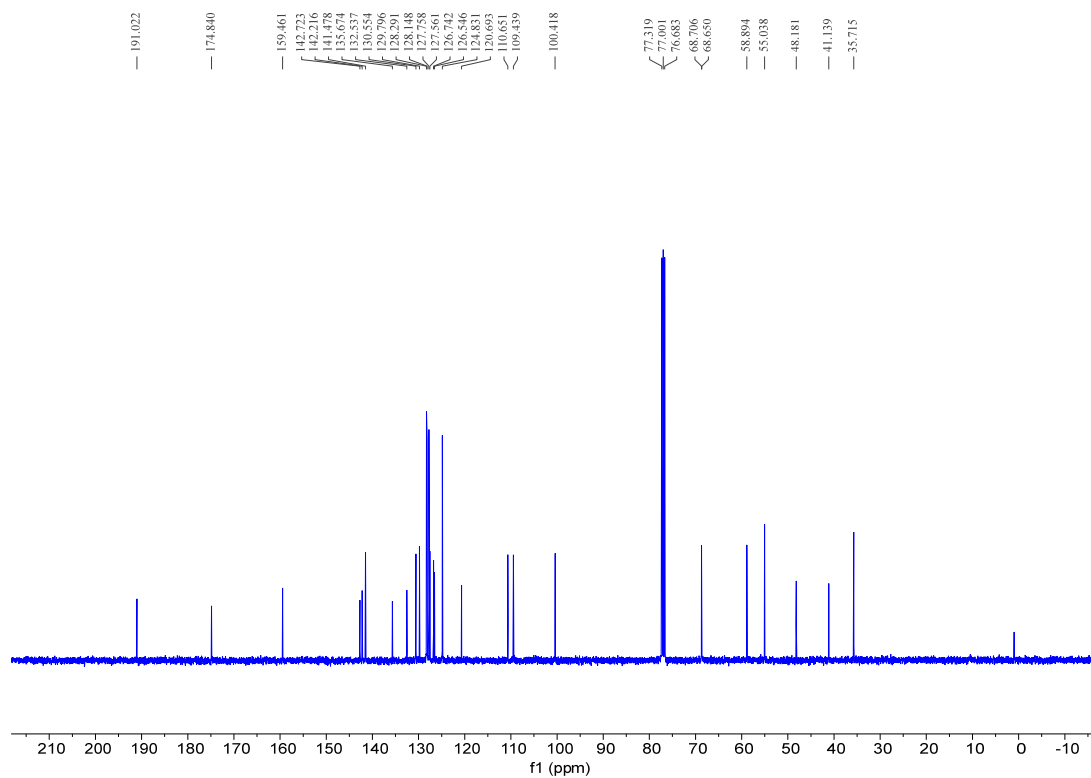

**$^1\text{H}$  and  $^{13}\text{C}$  NMR Spectra for Compound 3ql:** $^1\text{H}$  NMR (400 MHz,  $\text{CDCl}_3$ )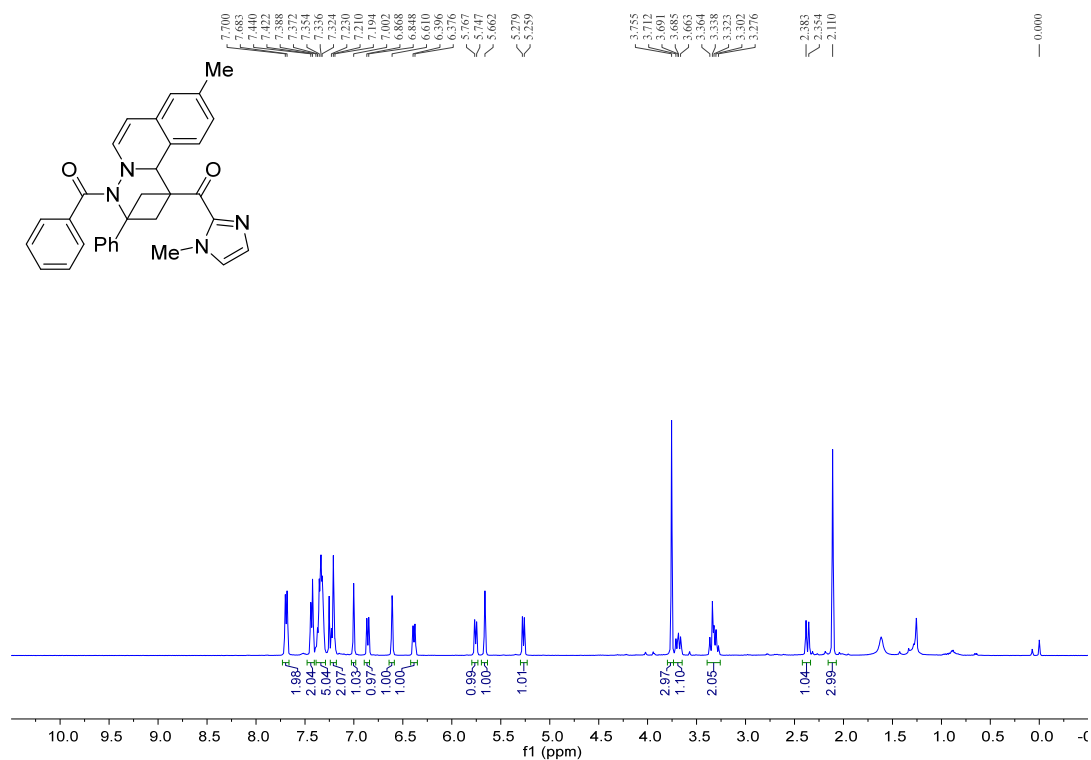 $^{13}\text{C}$  NMR (100 MHz,  $\text{CDCl}_3$ )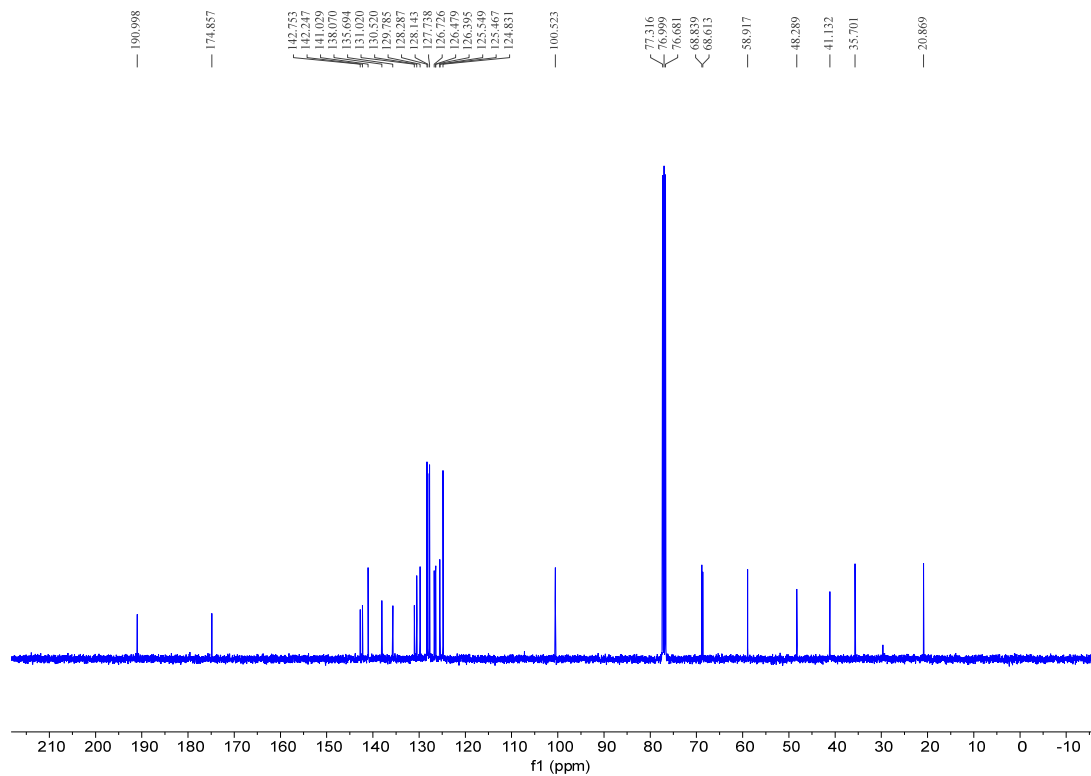

**$^1\text{H}$ ,  $^{13}\text{C}$  and  $^{19}\text{F}$  NMR Spectra for Compound 3qm:** **$^1\text{H}$  NMR (400 MHz,  $\text{CDCl}_3$ )**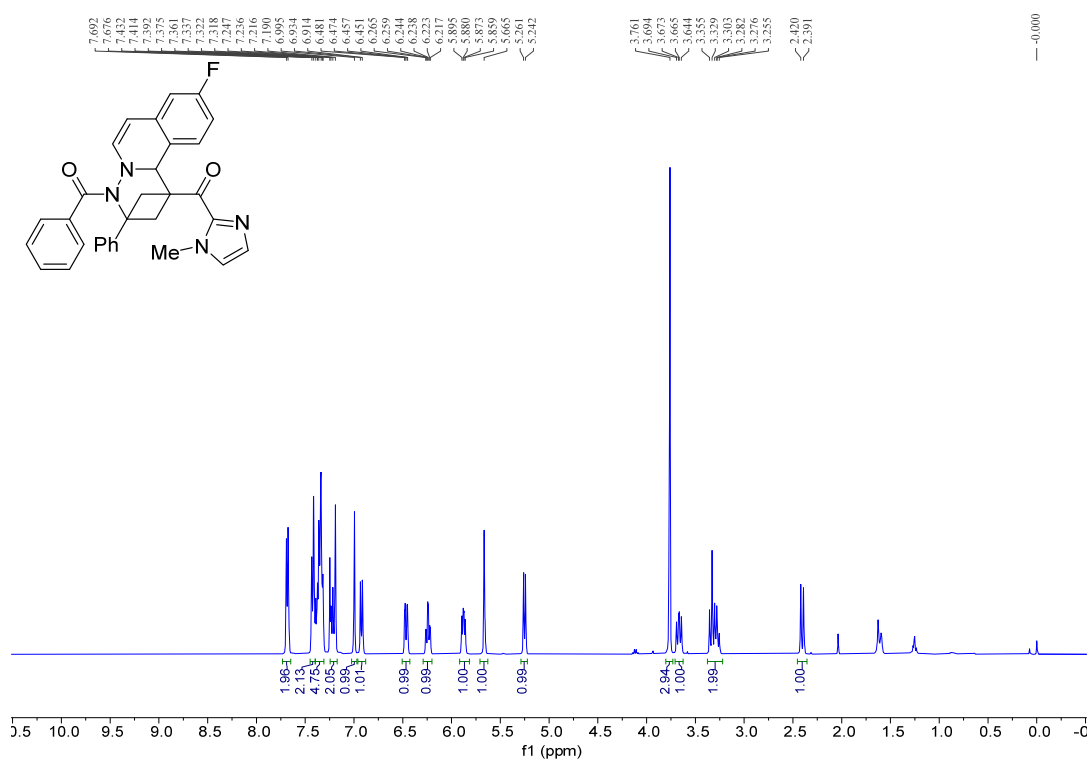 **$^{13}\text{C}$  NMR (100 MHz,  $\text{CDCl}_3$ )**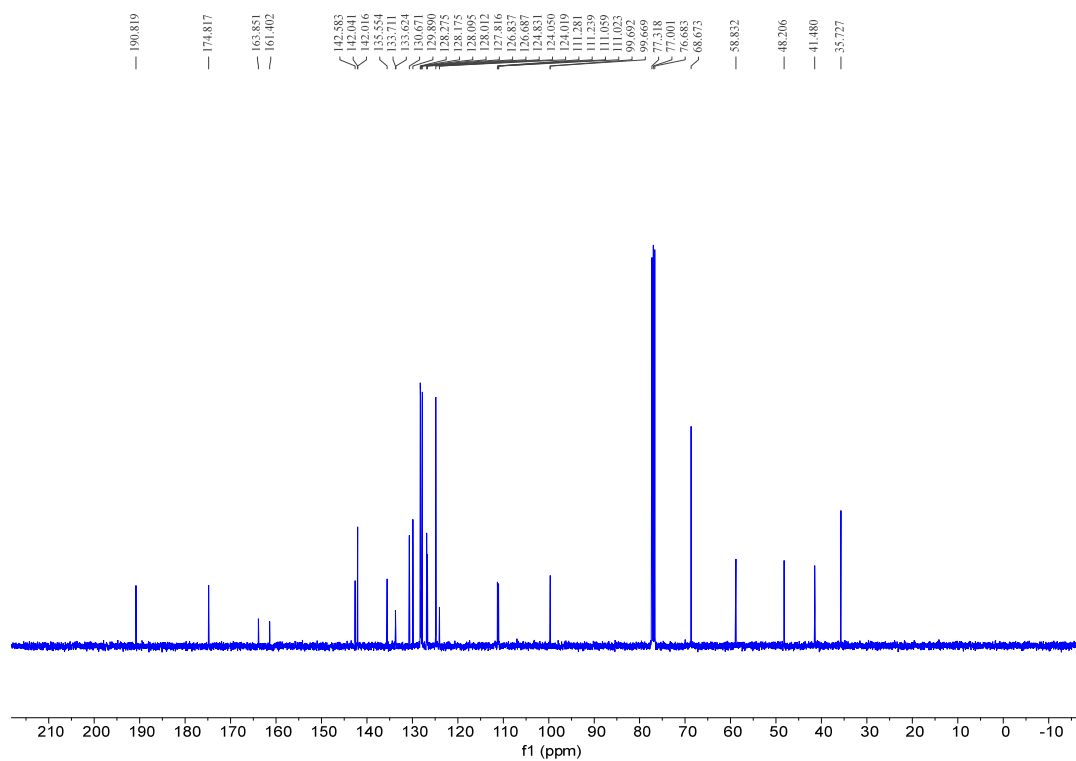



$^{19}\text{F}$  NMR (376 MHz,  $\text{CDCl}_3$ )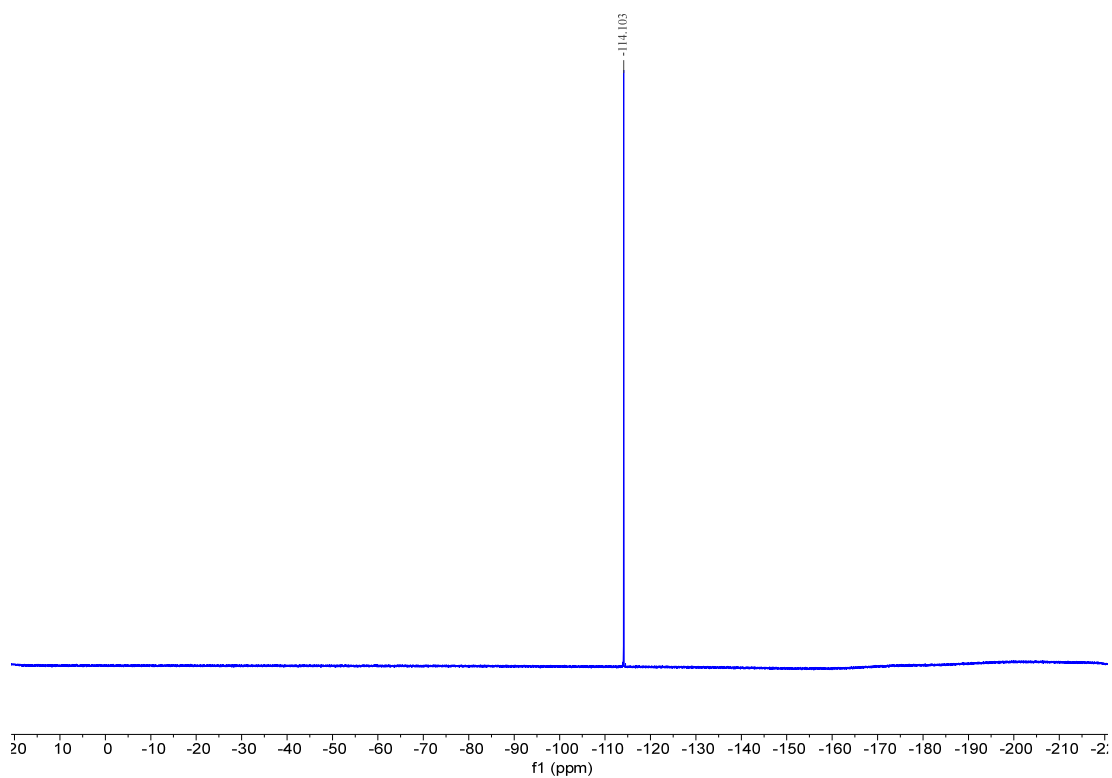 $^1\text{H}$  and  $^{13}\text{C}$  NMR Spectra for Compound 3qn: $^1\text{H}$  NMR (400 MHz,  $\text{CDCl}_3$ )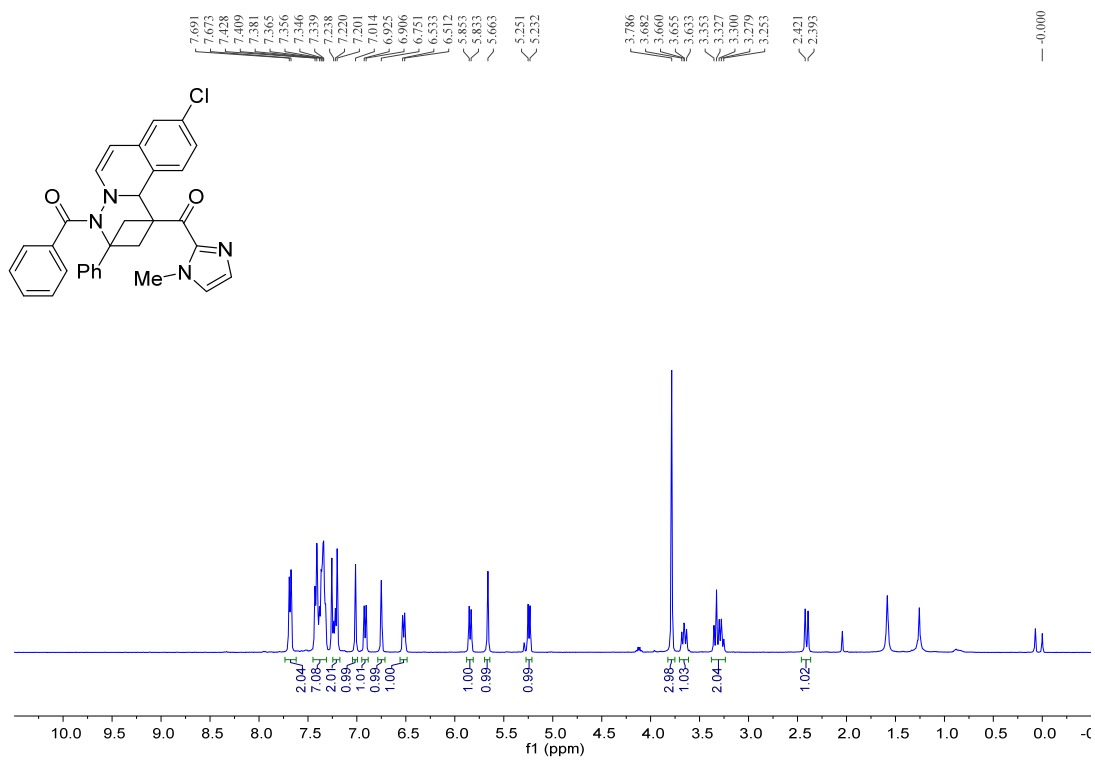

$^{13}\text{C}$  NMR (100 MHz,  $\text{CDCl}_3$ )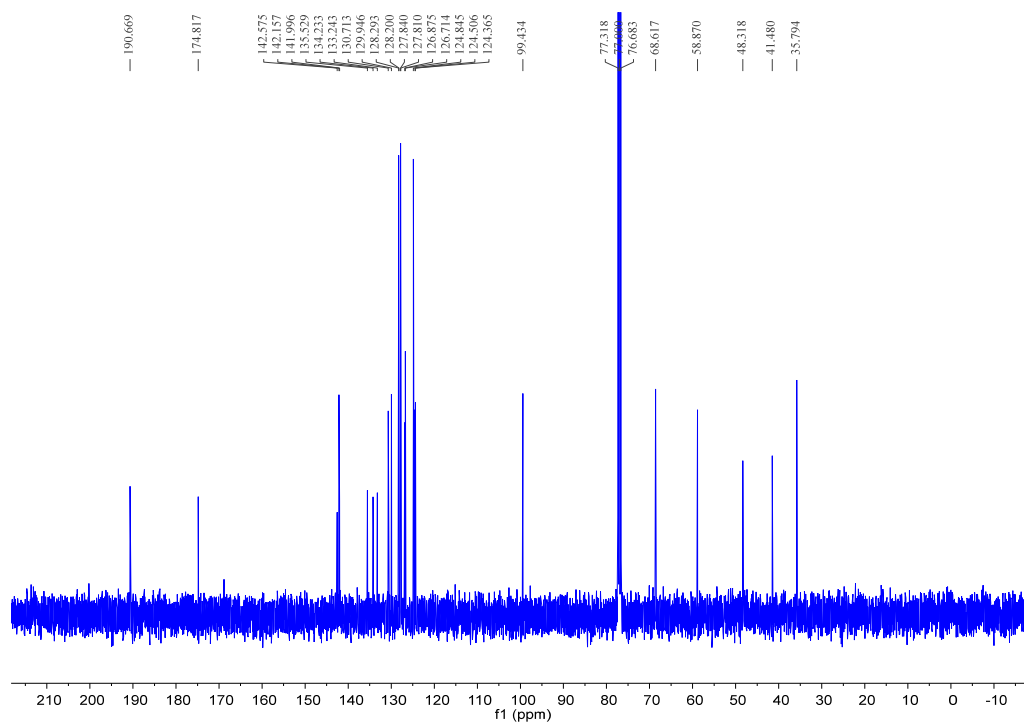 $^1\text{H}$  and  $^{13}\text{C}$  NMR Spectra for Compound 3qo: $^1\text{H}$  NMR (400 MHz,  $\text{CDCl}_3$ )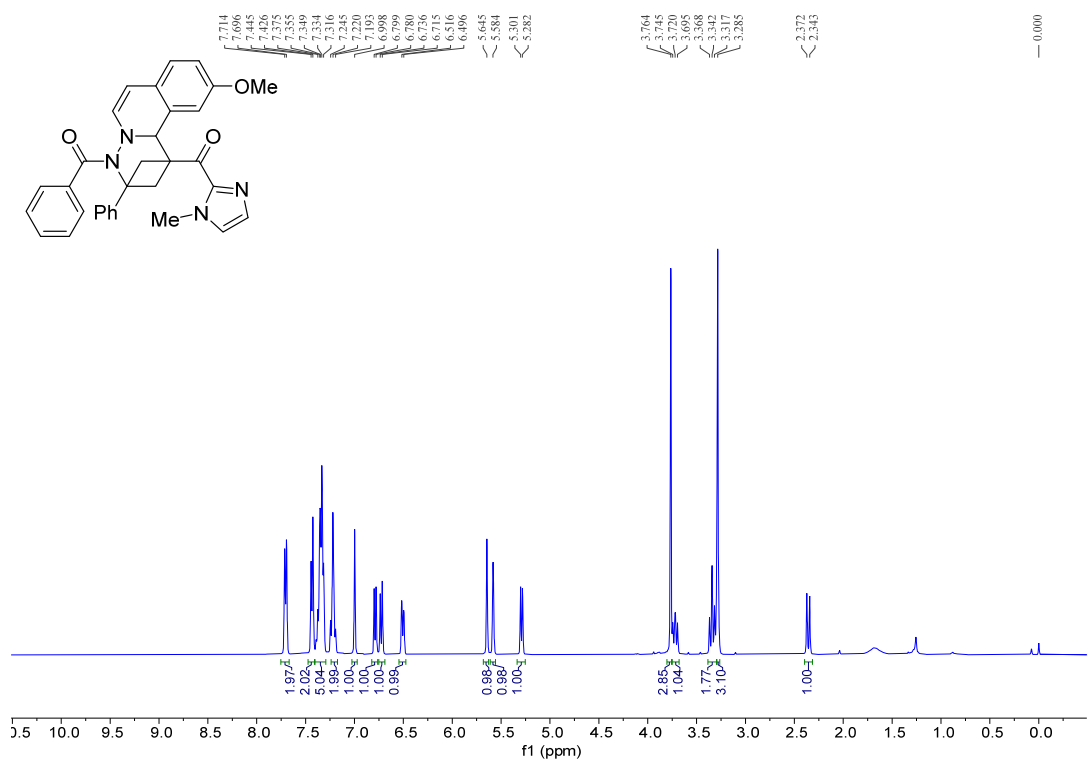 $^{13}\text{C}$  NMR (100 MHz,  $\text{CDCl}_3$ )

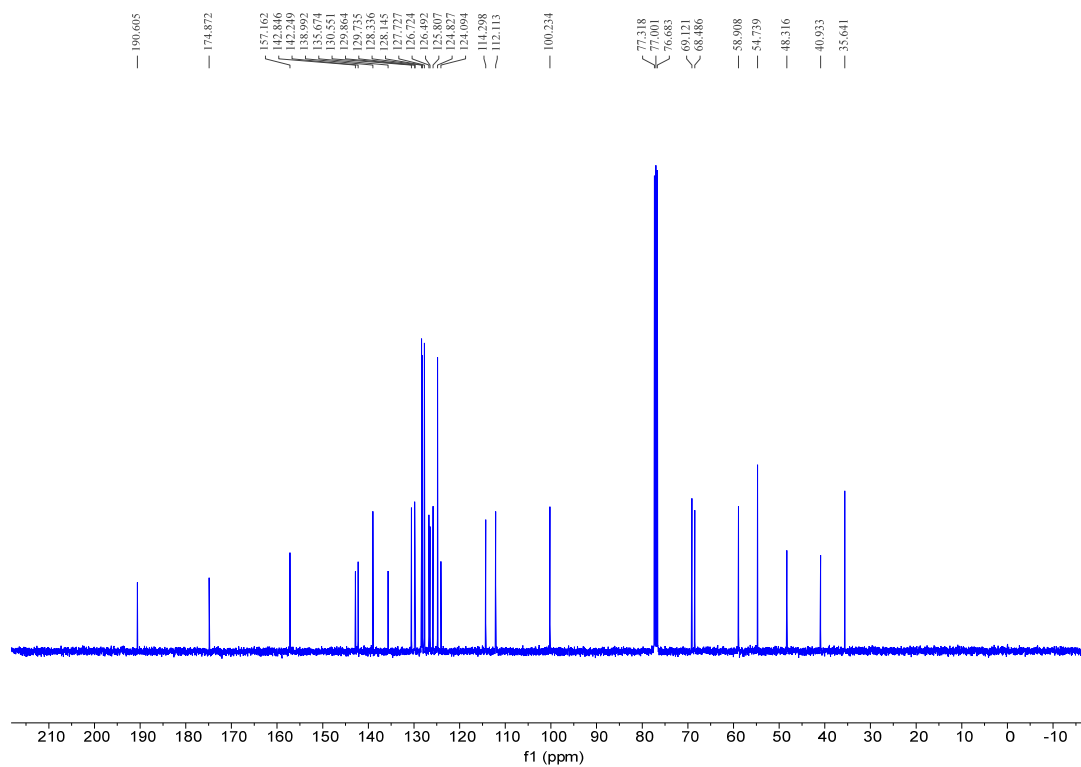

### <sup>1</sup>H and <sup>13</sup>C NMR Spectra for Compound 3qp:

#### <sup>1</sup>H NMR (400 MHz, CDCl<sub>3</sub>)

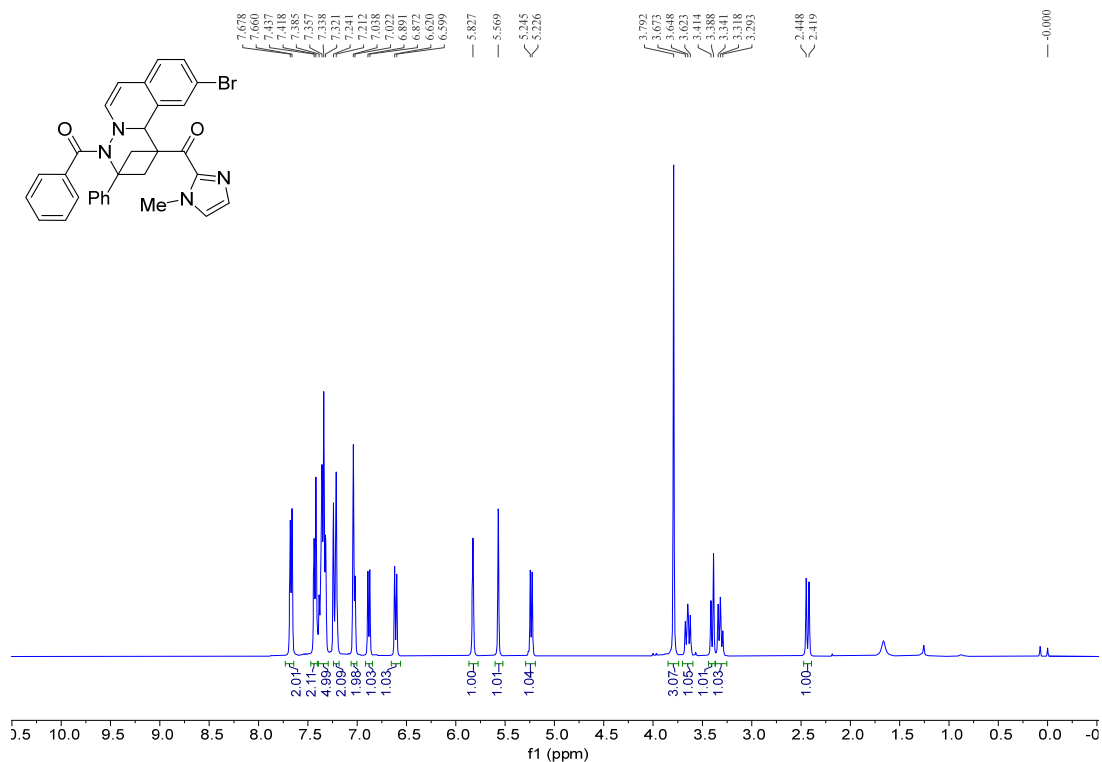

$^{13}\text{C}$  NMR (100 MHz,  $\text{CDCl}_3$ )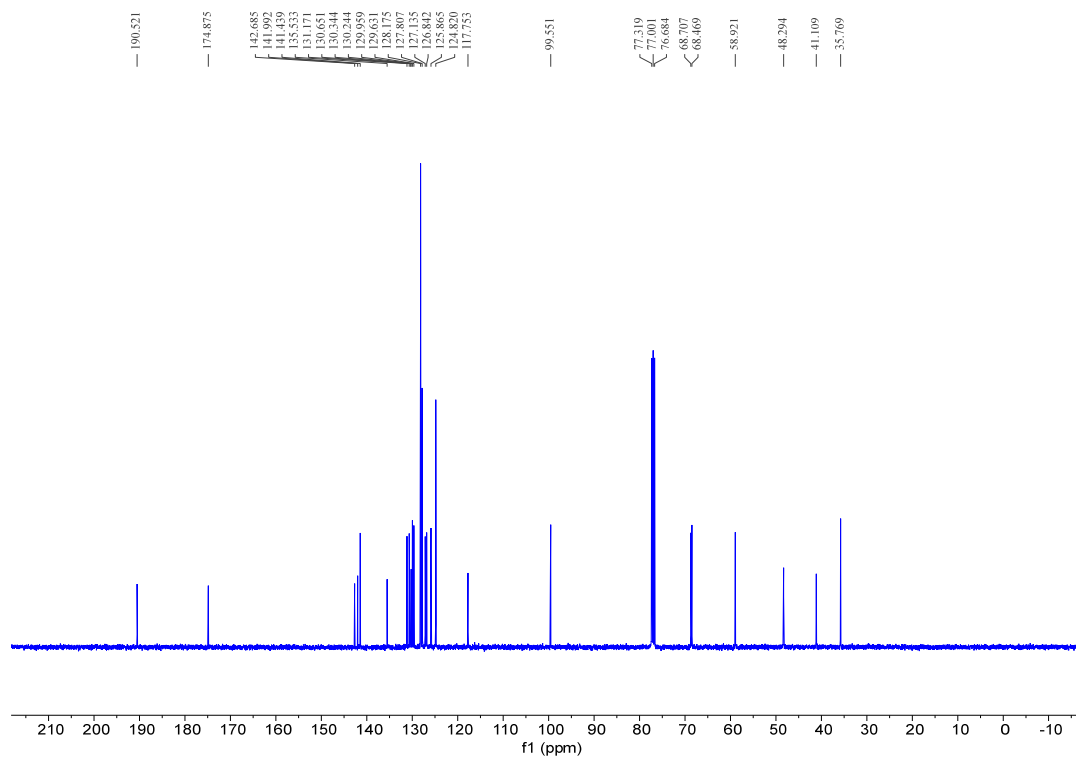 $^1\text{H}$  and  $^{13}\text{C}$  NMR Spectra for Compound 3qq: $^1\text{H}$  NMR (400 MHz,  $\text{CDCl}_3$ )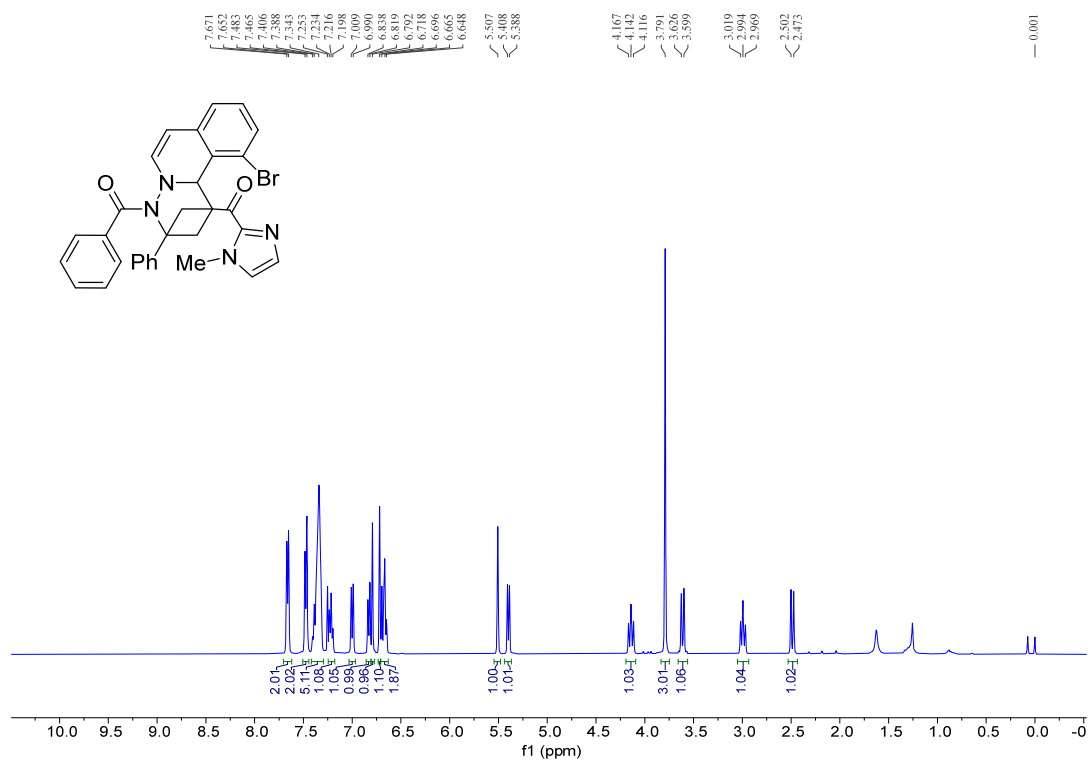

$^{13}\text{C}$  NMR (100 MHz,  $\text{CDCl}_3$ )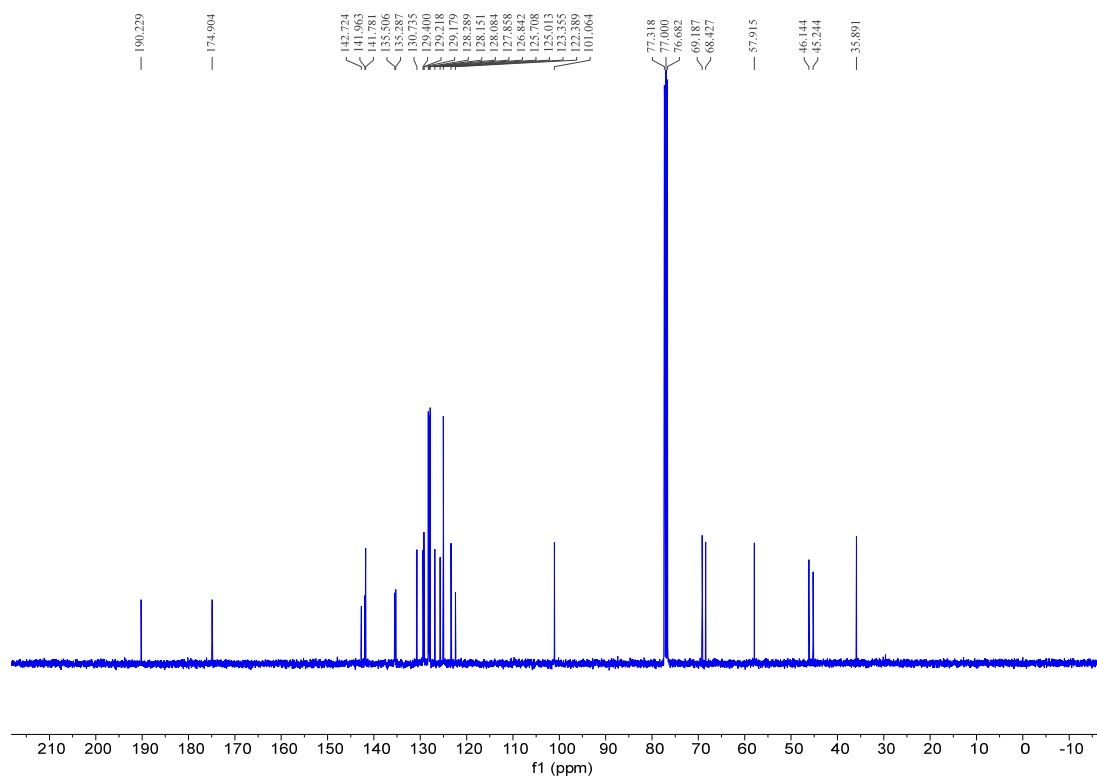 $^1\text{H}$  and  $^{13}\text{C}$  NMR Spectra for Compound 4qb: $^1\text{H}$  NMR (400 MHz,  $\text{CDCl}_3$ )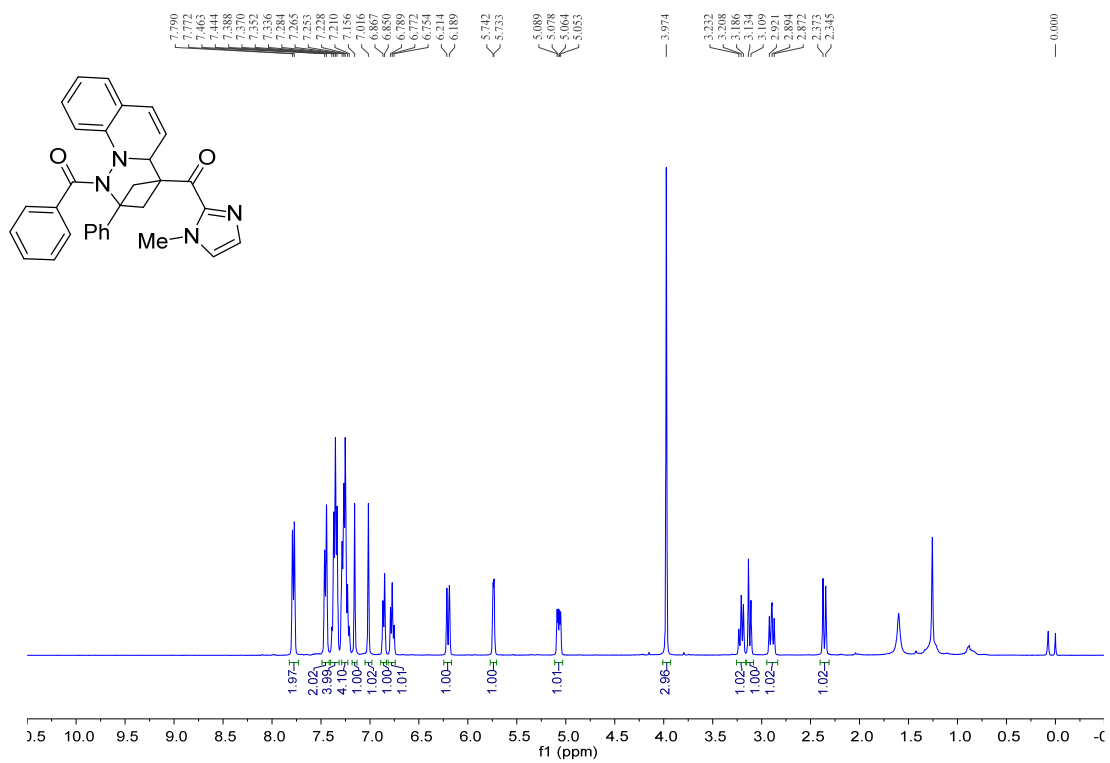

$^{13}\text{C}$  NMR (100 MHz,  $\text{CDCl}_3$ )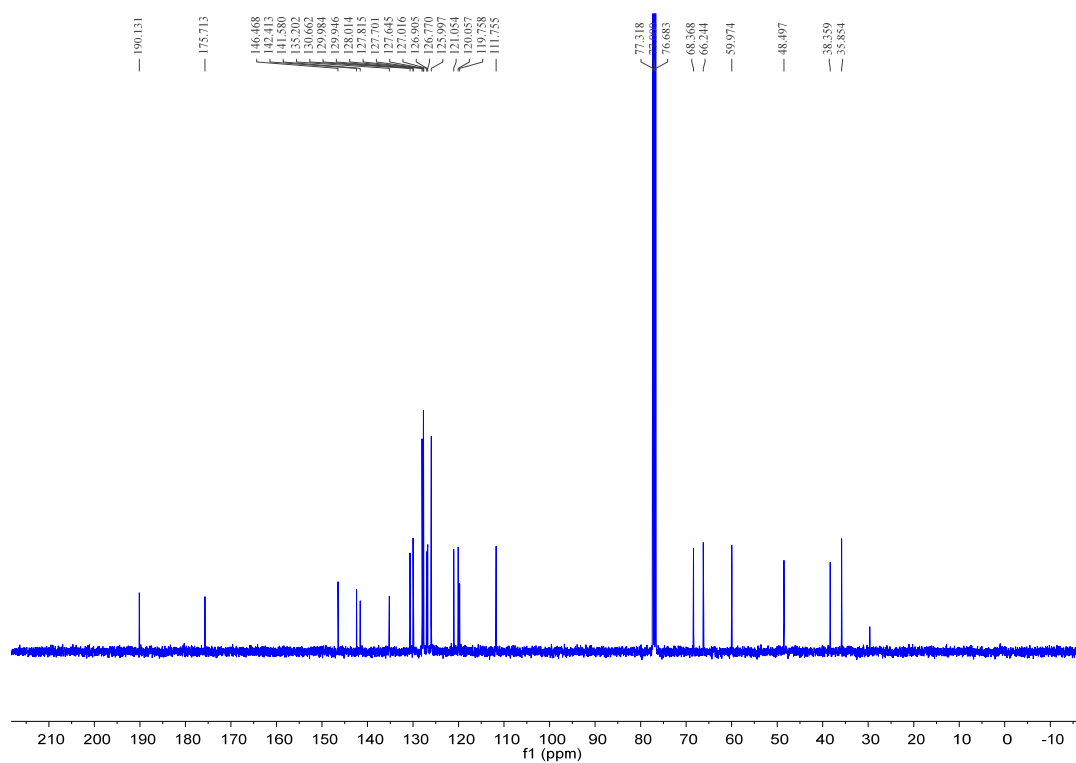 $^1\text{H}$ ,  $^{13}\text{C}$  and  $^{19}\text{F}$  NMR Spectra for Compound (*R*)-3sd: $^1\text{H}$  NMR (400 MHz,  $\text{CDCl}_3$ )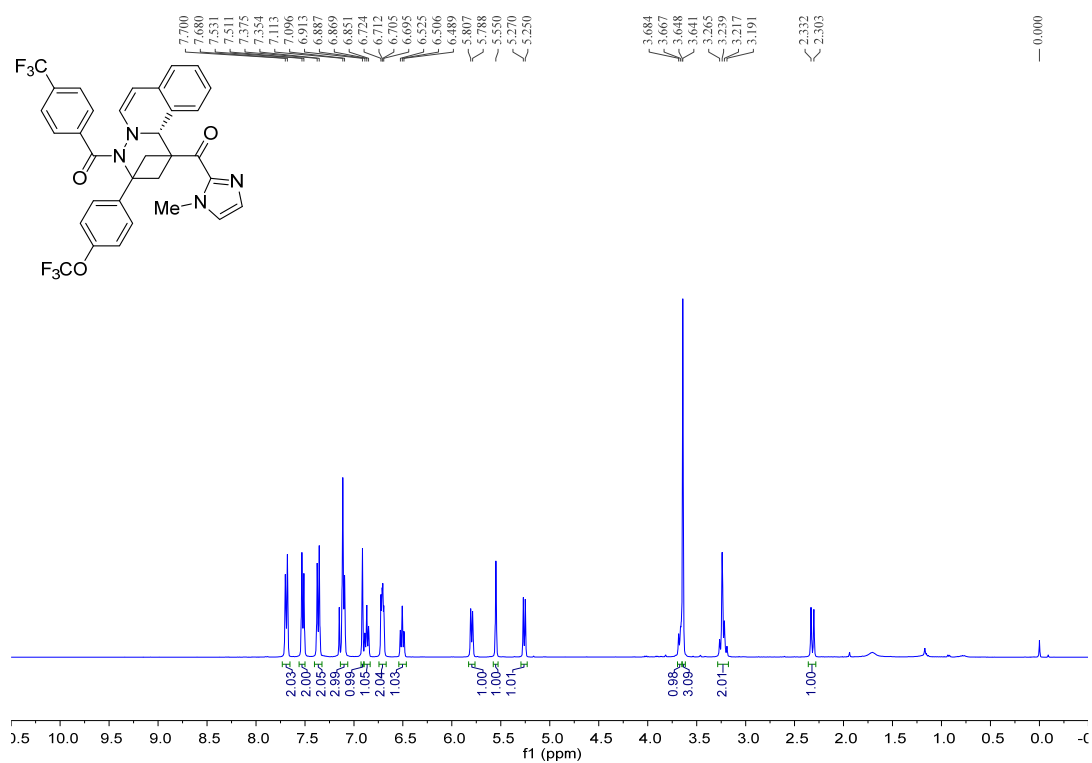

$^{13}\text{C}$  NMR (100 MHz,  $\text{CDCl}_3$ )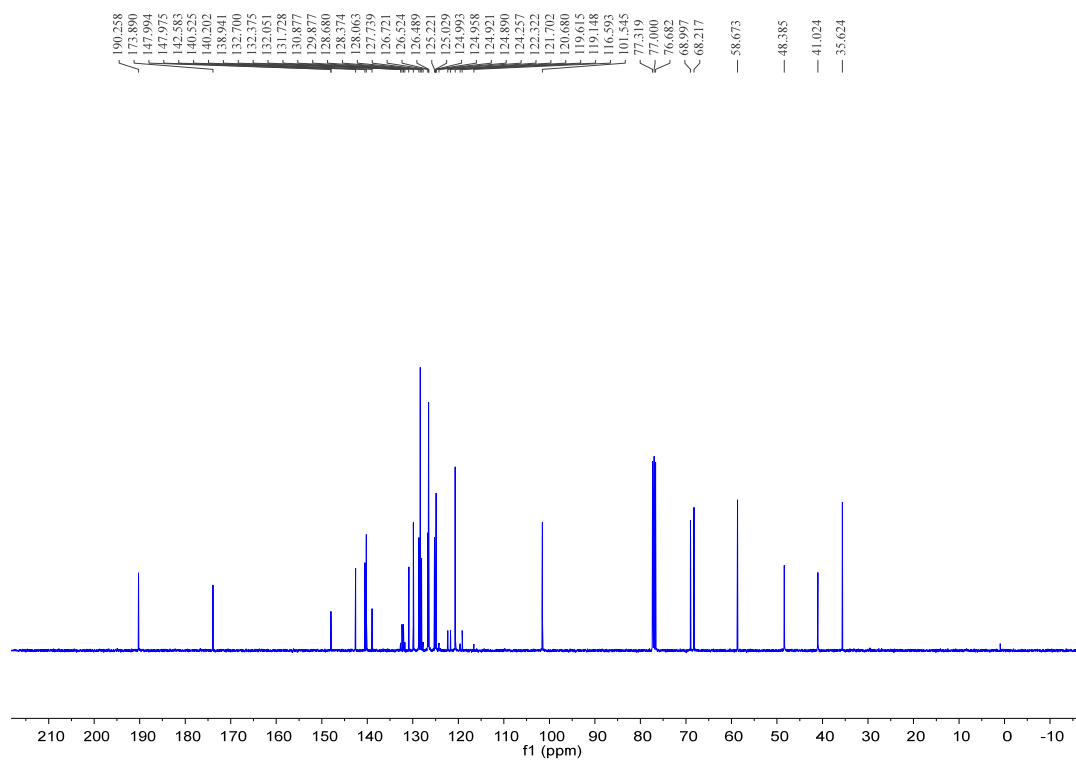 $^{19}\text{F}$  NMR (376 MHz,  $\text{CDCl}_3$ )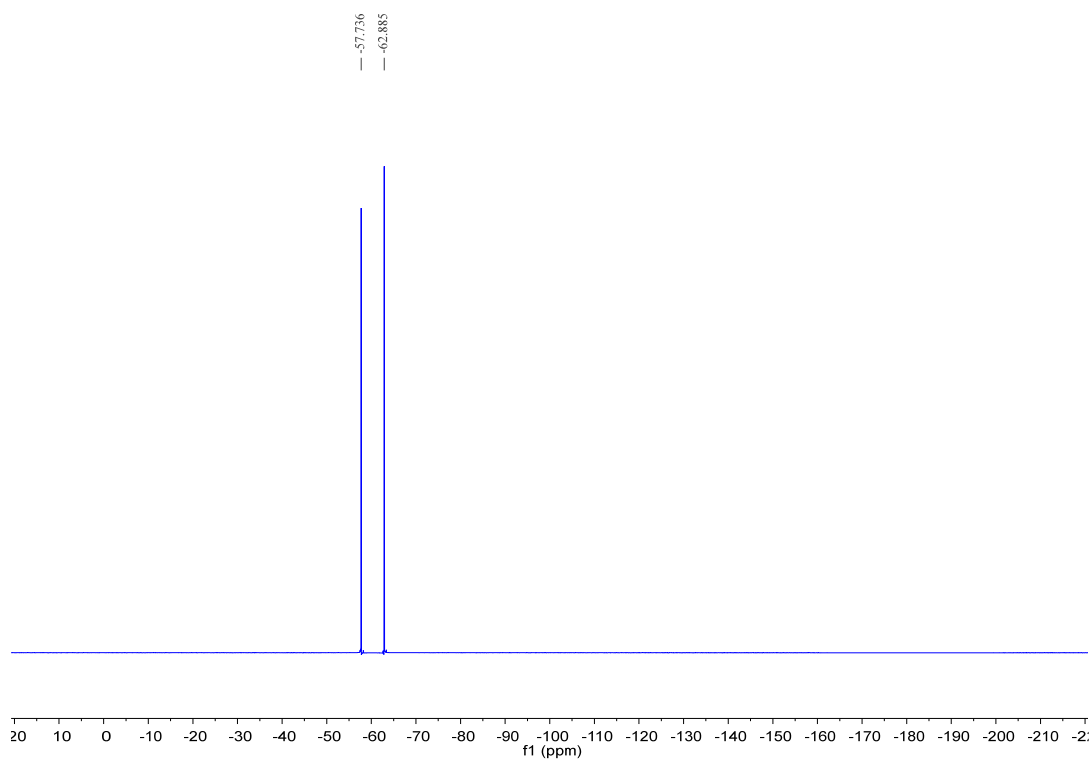

**$^1\text{H}$ ,  $^{13}\text{C}$  and  $^{19}\text{F}$  NMR Spectra for Compound (*R*)-3vd:** **$^1\text{H}$  NMR (400 MHz,  $\text{CDCl}_3$ )**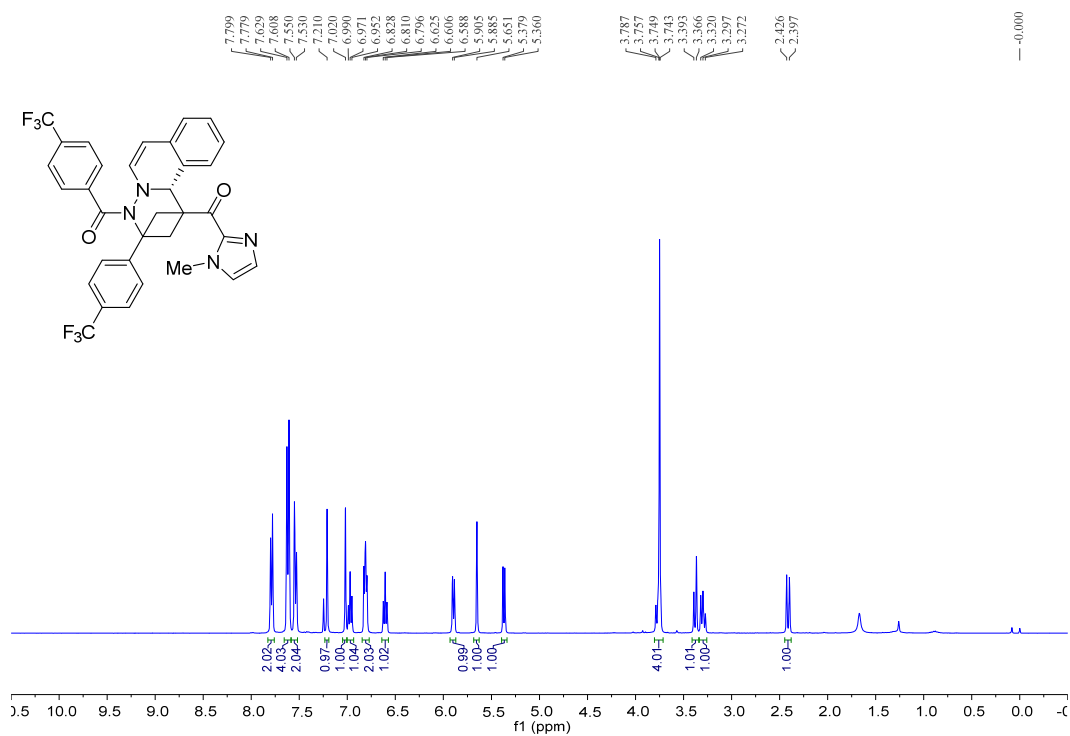 **$^{13}\text{C}$  NMR (100 MHz,  $\text{CDCl}_3$ )**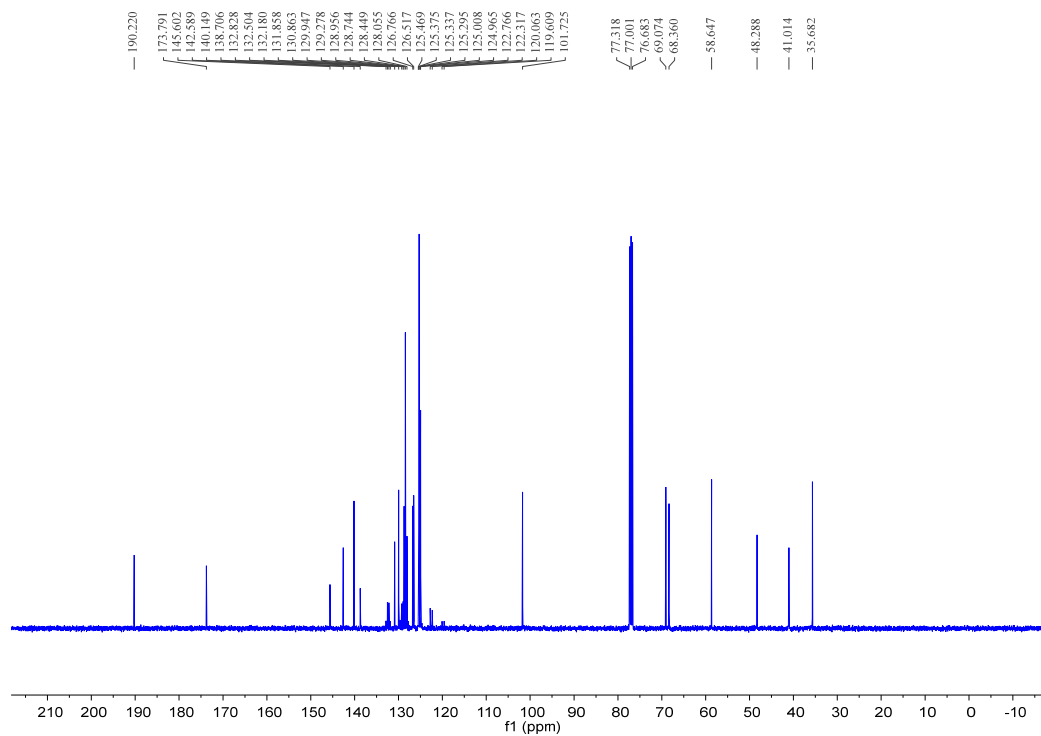



$^{19}\text{F}$  NMR (376 MHz,  $\text{CDCl}_3$ )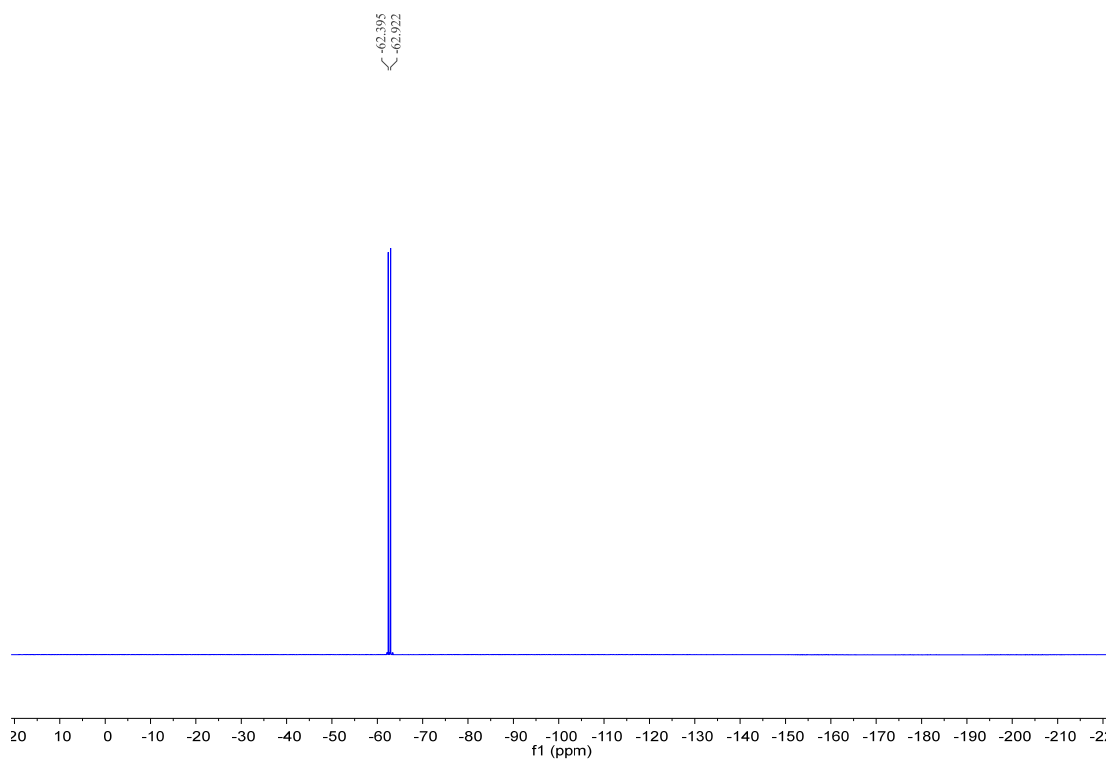 $^1\text{H}$ ,  $^{13}\text{C}$  and  $^{19}\text{F}$  NMR Spectra for Compound (*R*)-3ud: $^1\text{H}$  NMR (400 MHz,  $\text{CDCl}_3$ )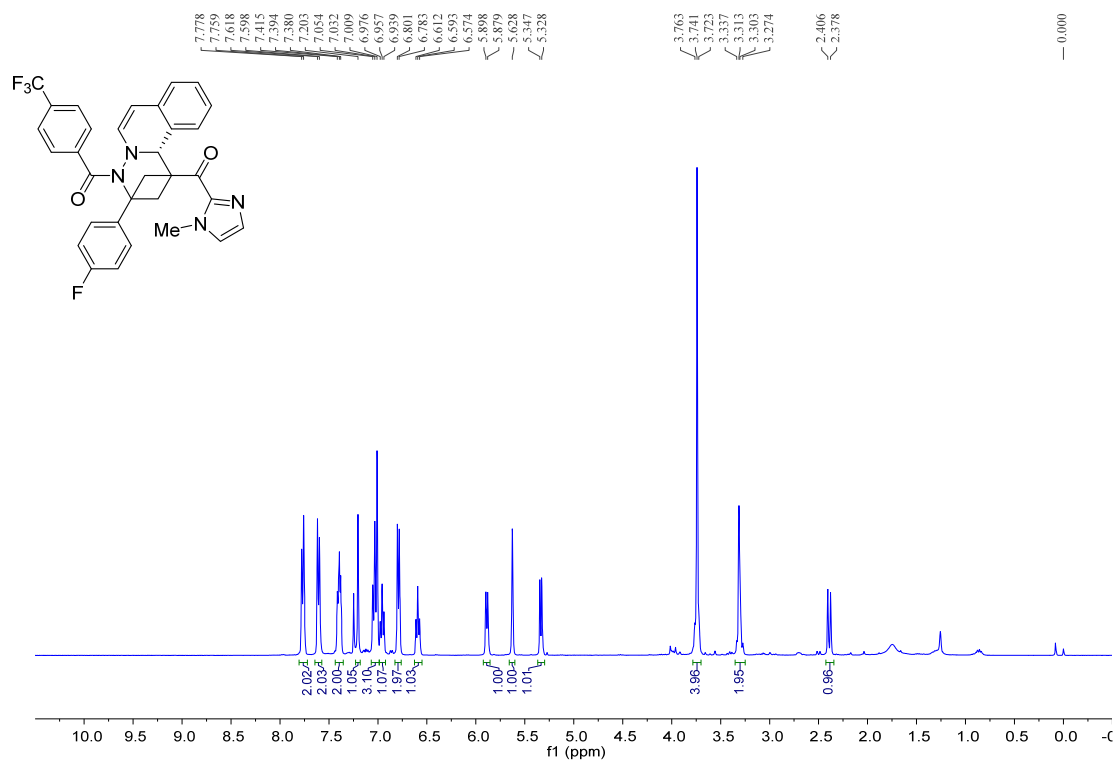

$^{13}\text{C}$  NMR (100 MHz,  $\text{CDCl}_3$ )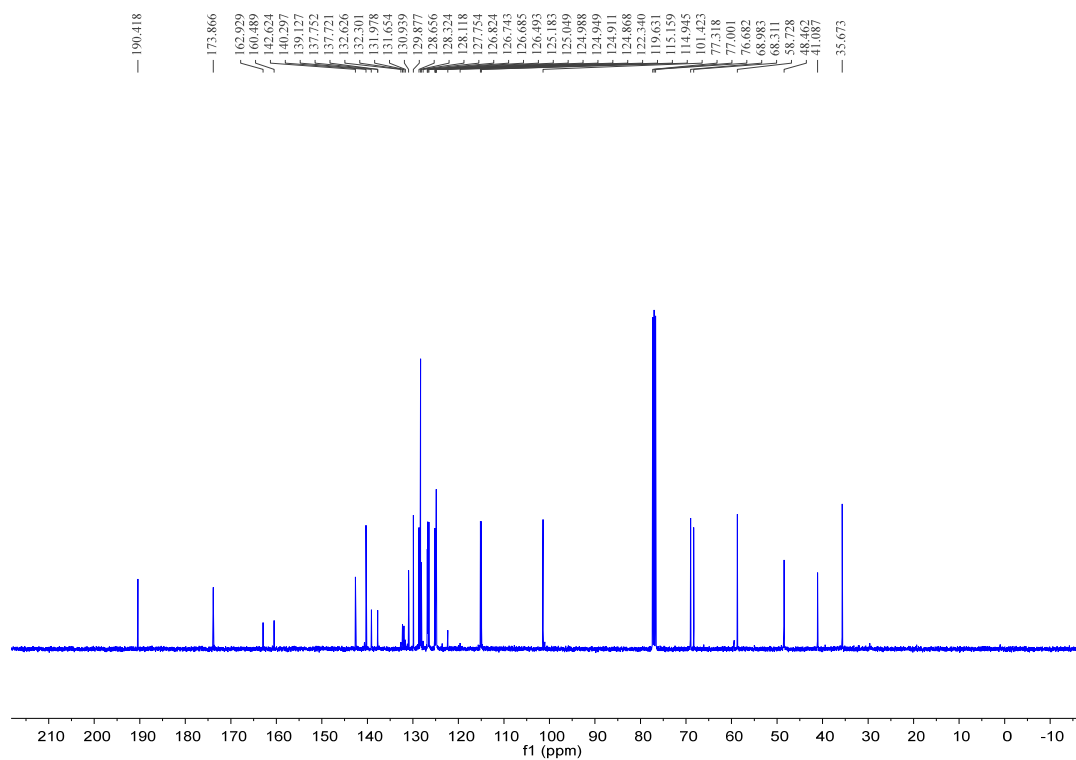 $^{19}\text{F}$  NMR (376 MHz,  $\text{CDCl}_3$ )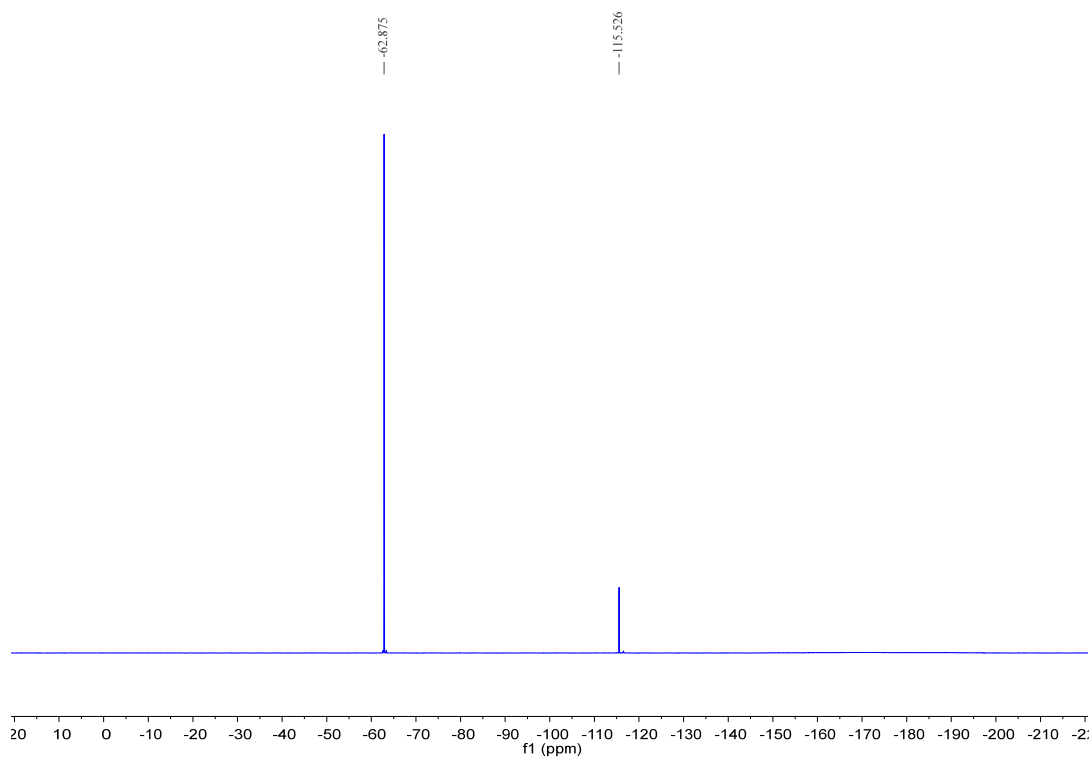

**$^1\text{H}$ ,  $^{13}\text{C}$  and  $^{19}\text{F}$  NMR Spectra for Compound (*R*)-3yd:** **$^1\text{H}$  NMR (400 MHz,  $\text{CDCl}_3$ )**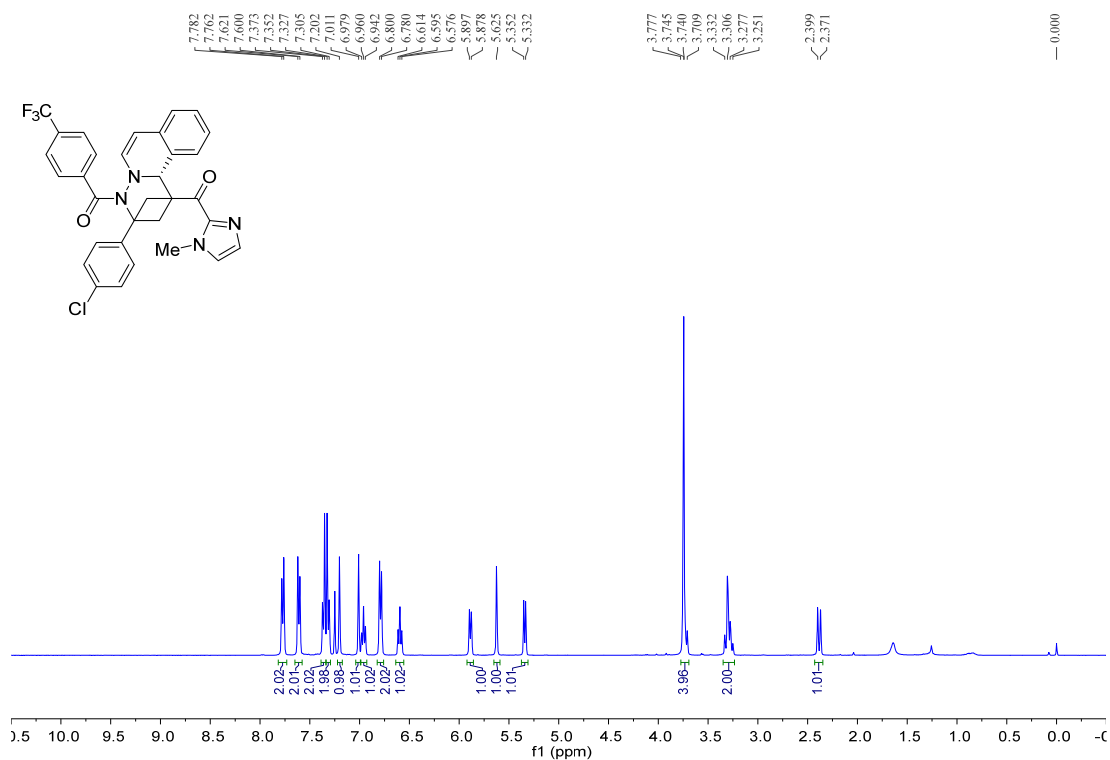 **$^{13}\text{C}$  NMR (100 MHz,  $\text{CDCl}_3$ )**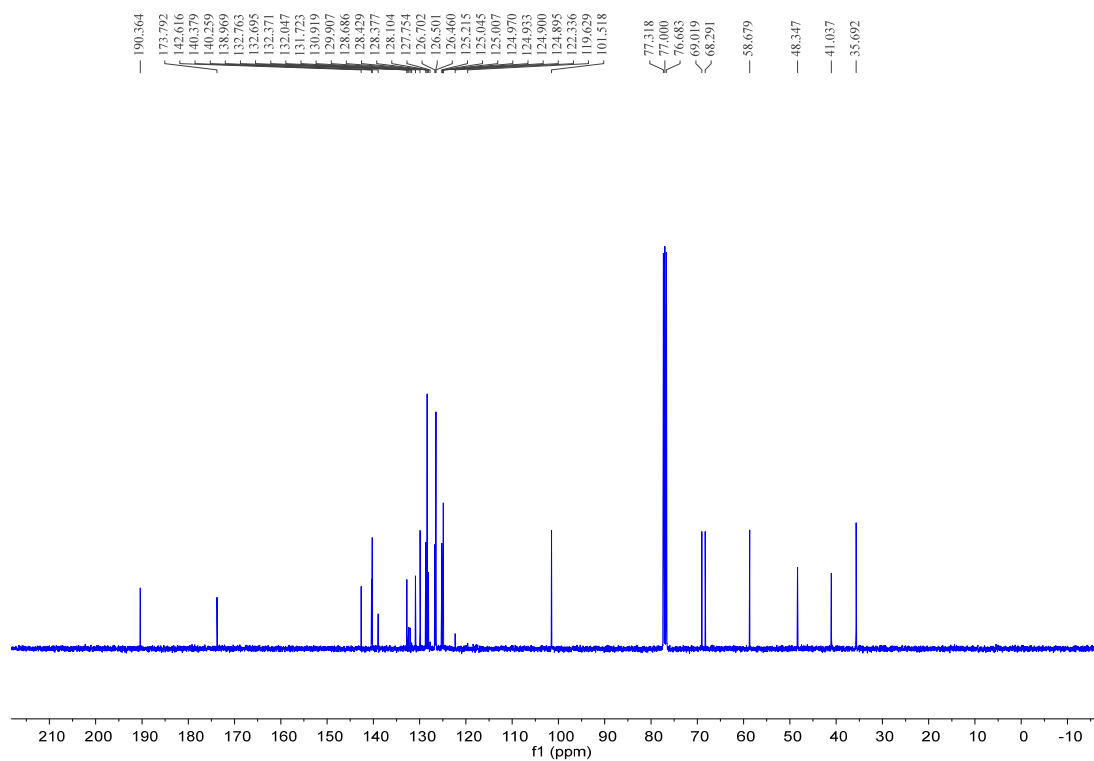

$^{19}\text{F}$  NMR (376 MHz,  $\text{CDCl}_3$ )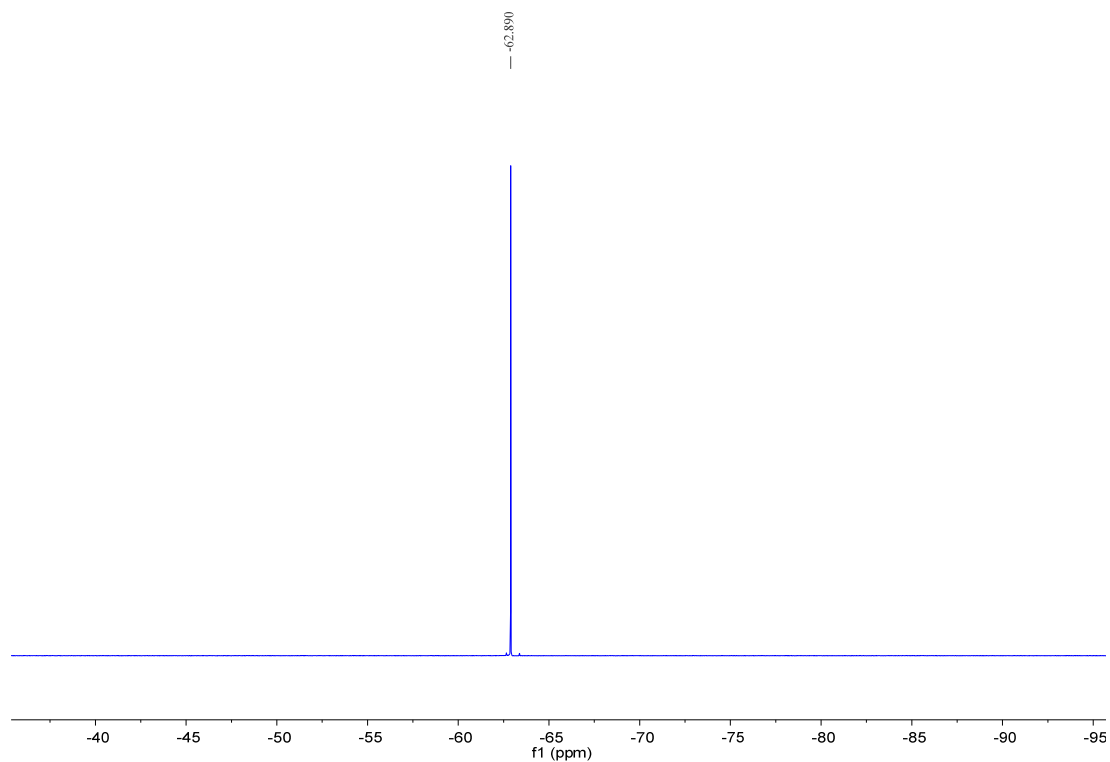 $^1\text{H}$ ,  $^{13}\text{C}$  and  $^{19}\text{F}$  NMR Spectra for Compound (*R*)-3zd: $^1\text{H}$  NMR (400 MHz,  $\text{CDCl}_3$ )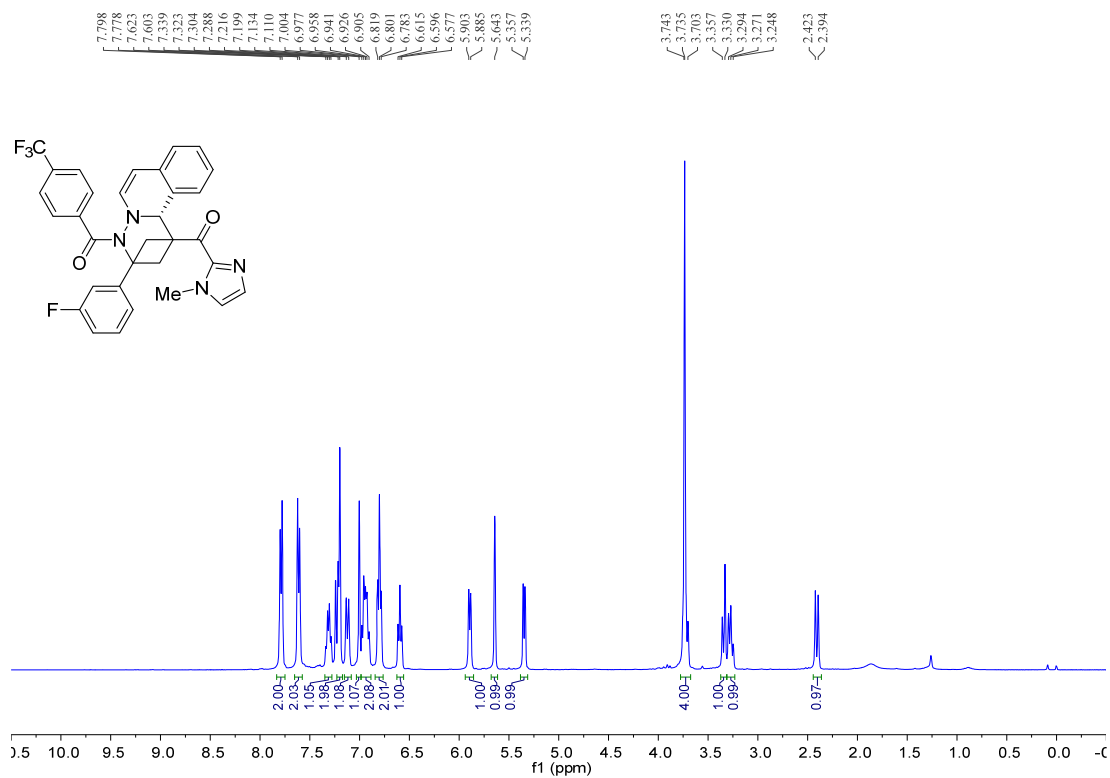

$^{13}\text{C}$  NMR (100 MHz,  $\text{CDCl}_3$ )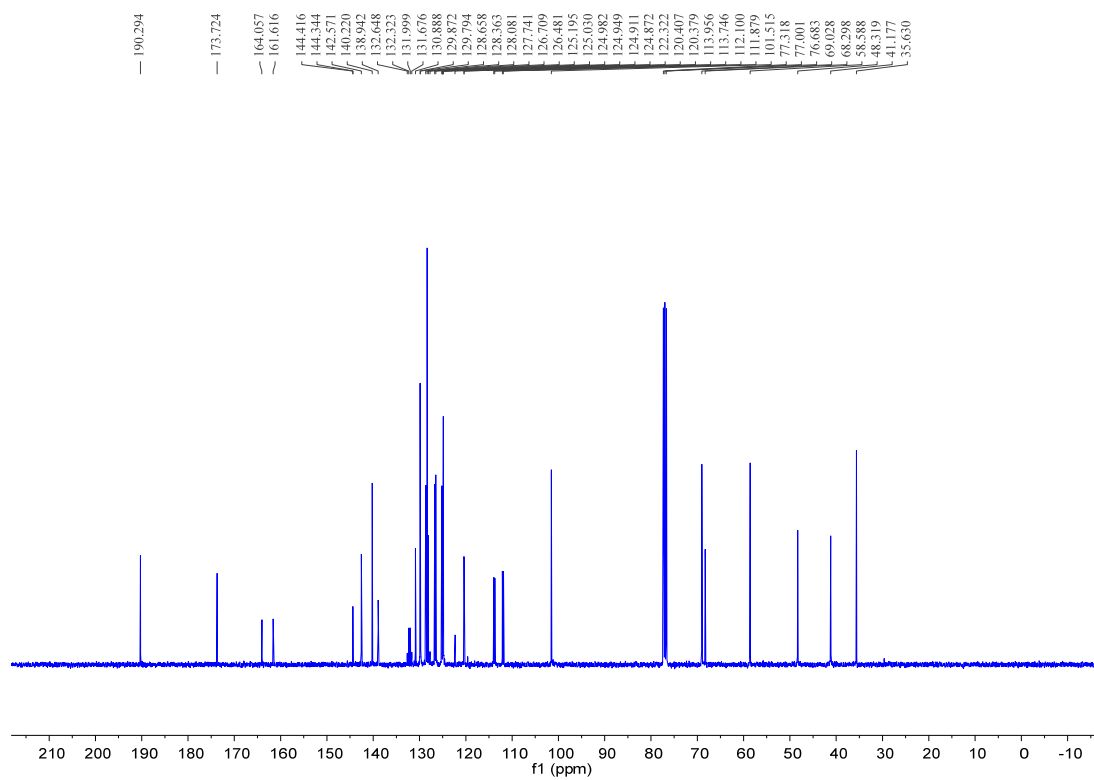 $^{19}\text{F}$  NMR (376 MHz,  $\text{CDCl}_3$ )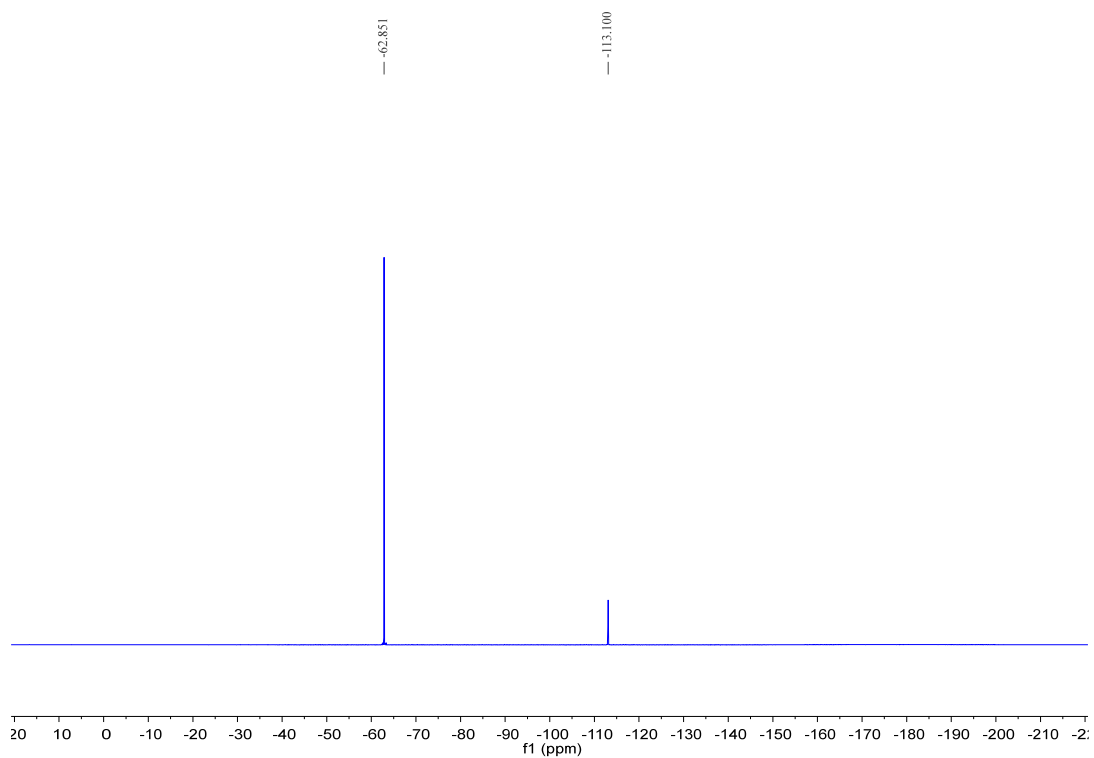

**$^1\text{H}$ ,  $^{13}\text{C}$  and  $^{19}\text{F}$  NMR Spectra for Compound (*R*)-3qr:** **$^1\text{H}$  NMR (400 MHz,  $\text{CDCl}_3$ )**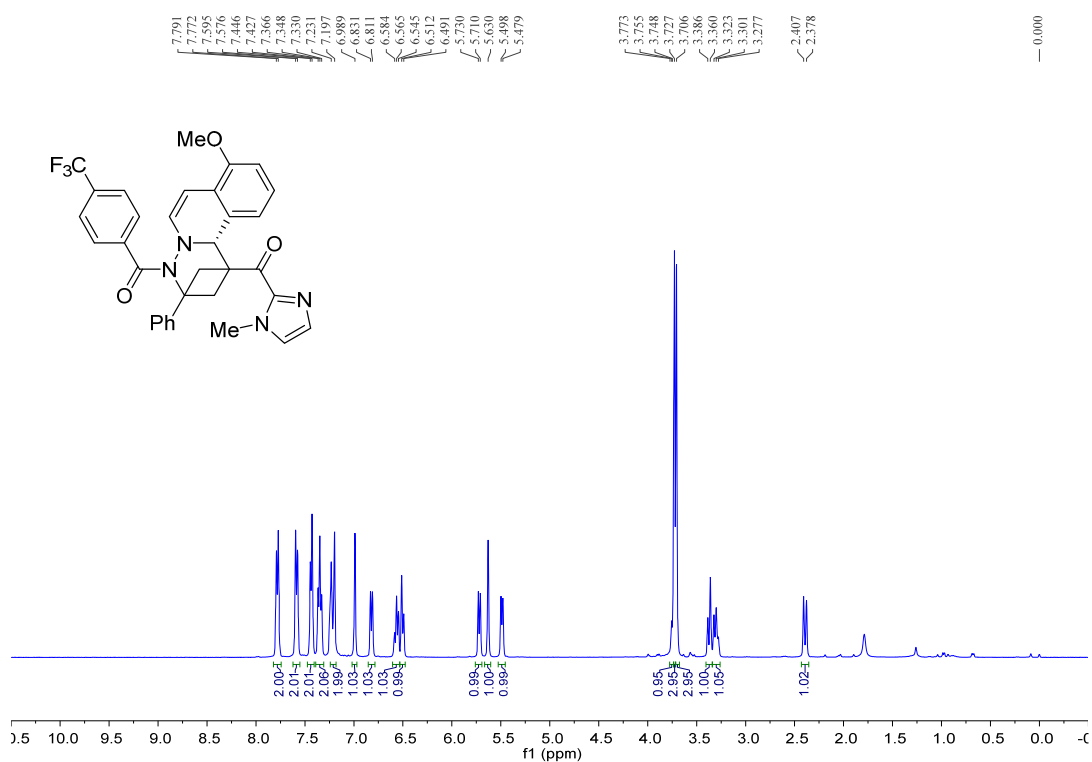 **$^{13}\text{C}$  NMR (100 MHz,  $\text{CDCl}_3$ )**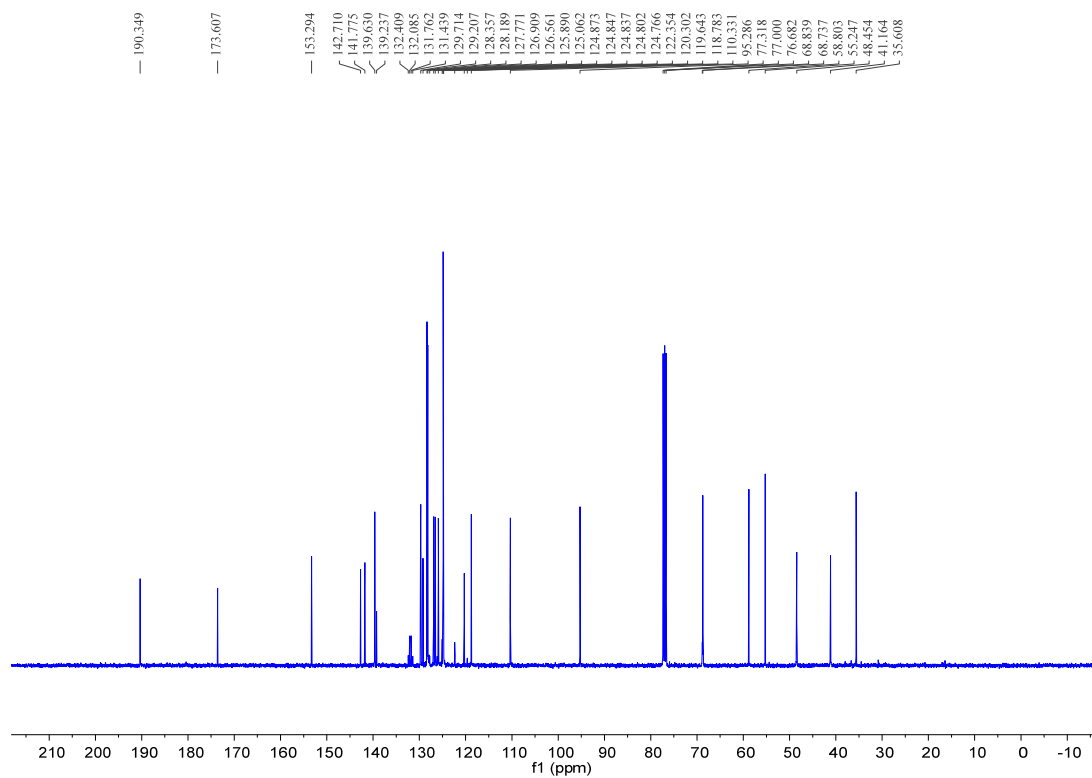

$^{19}\text{F}$  NMR (376 MHz,  $\text{CDCl}_3$ )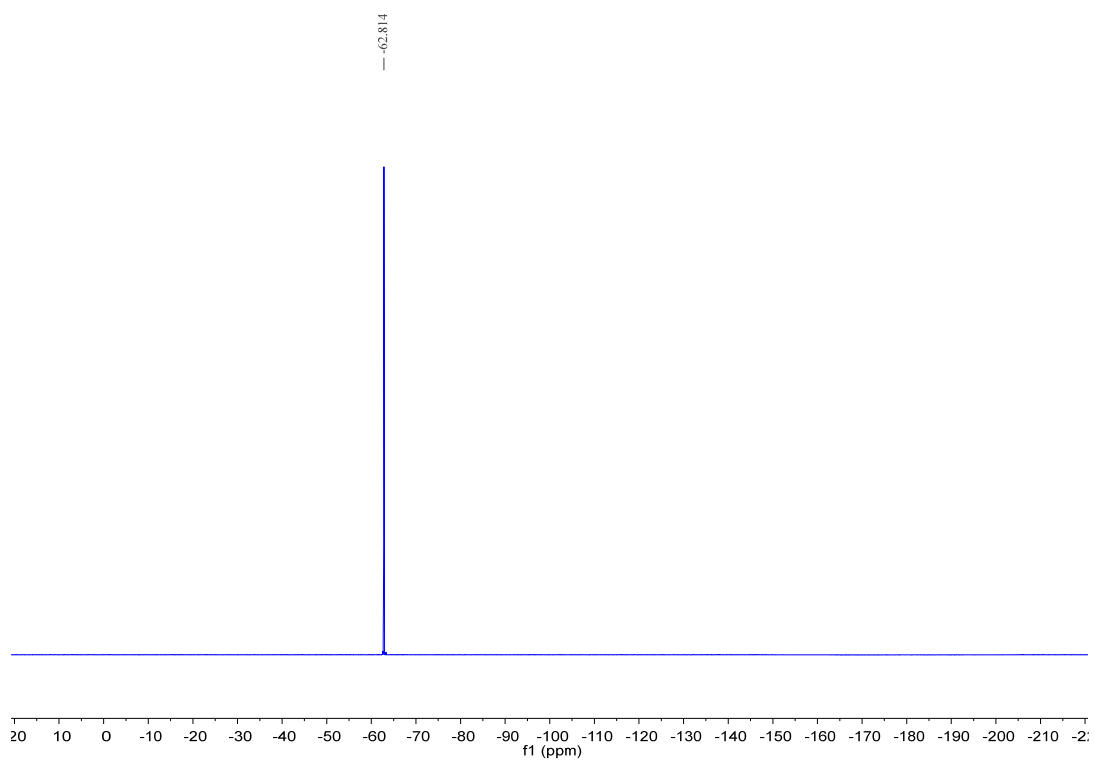 $^1\text{H}$ ,  $^{13}\text{C}$  and  $^{19}\text{F}$  NMR Spectra for Compound (*R*)-3qs: $^1\text{H}$  NMR (400 MHz,  $\text{CDCl}_3$ )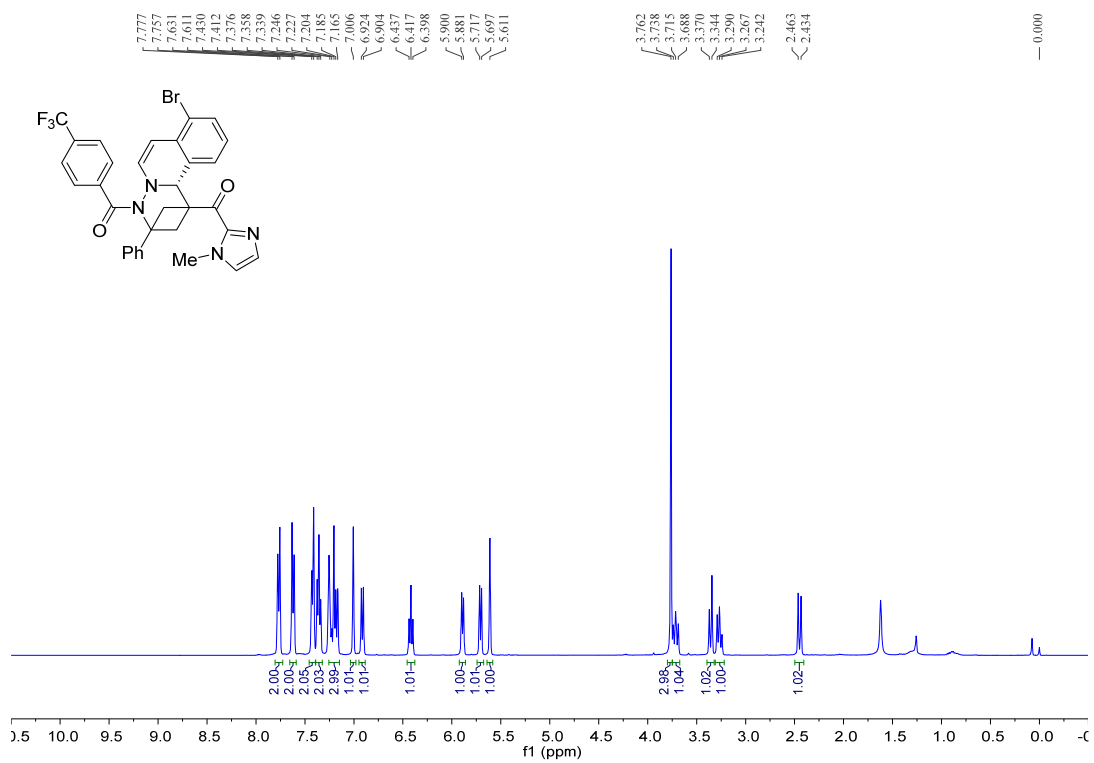

$^{13}\text{C}$  NMR (100 MHz,  $\text{CDCl}_3$ )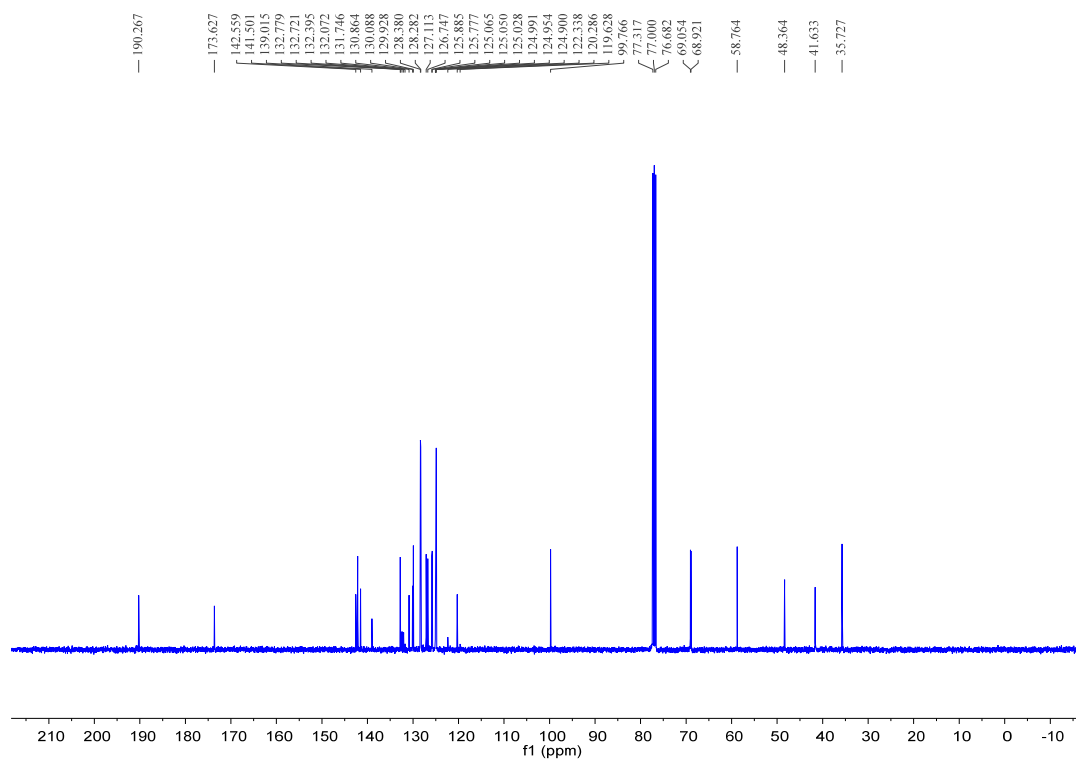 $^{19}\text{F}$  NMR (376 MHz,  $\text{CDCl}_3$ )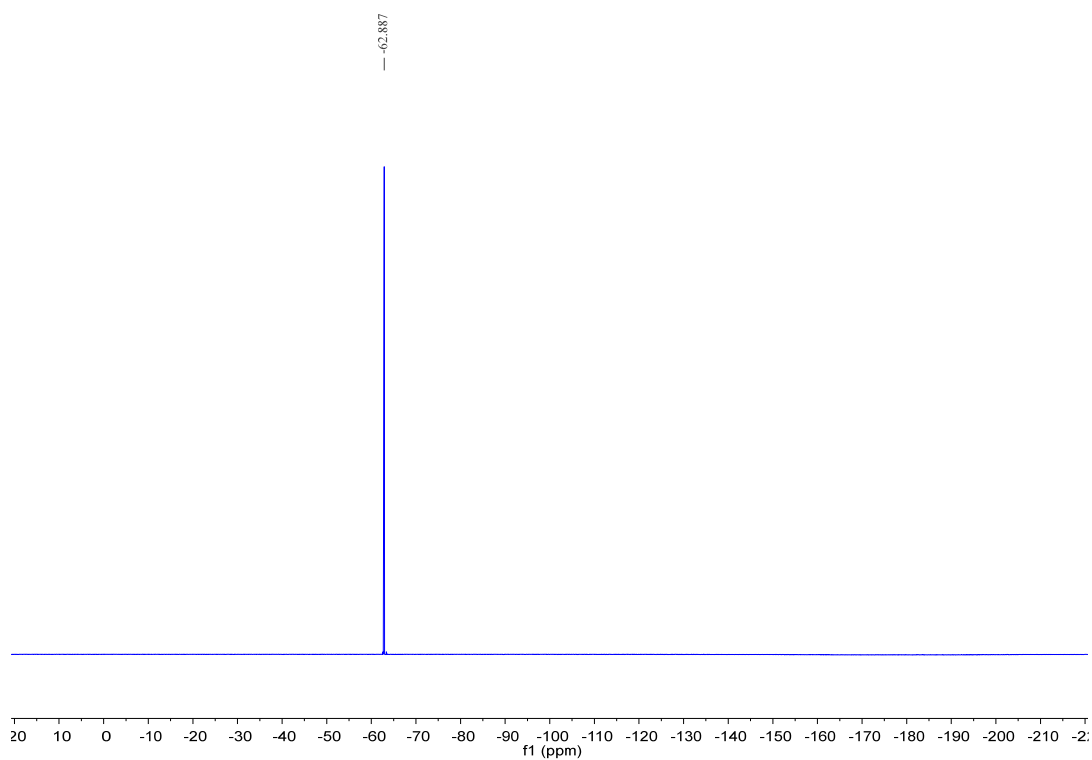



**$^1\text{H}$ ,  $^{13}\text{C}$  and  $^{19}\text{F}$  NMR Spectra for Compound (*R*)-3qt:** $^1\text{H}$  NMR (400 MHz,  $\text{CDCl}_3$ )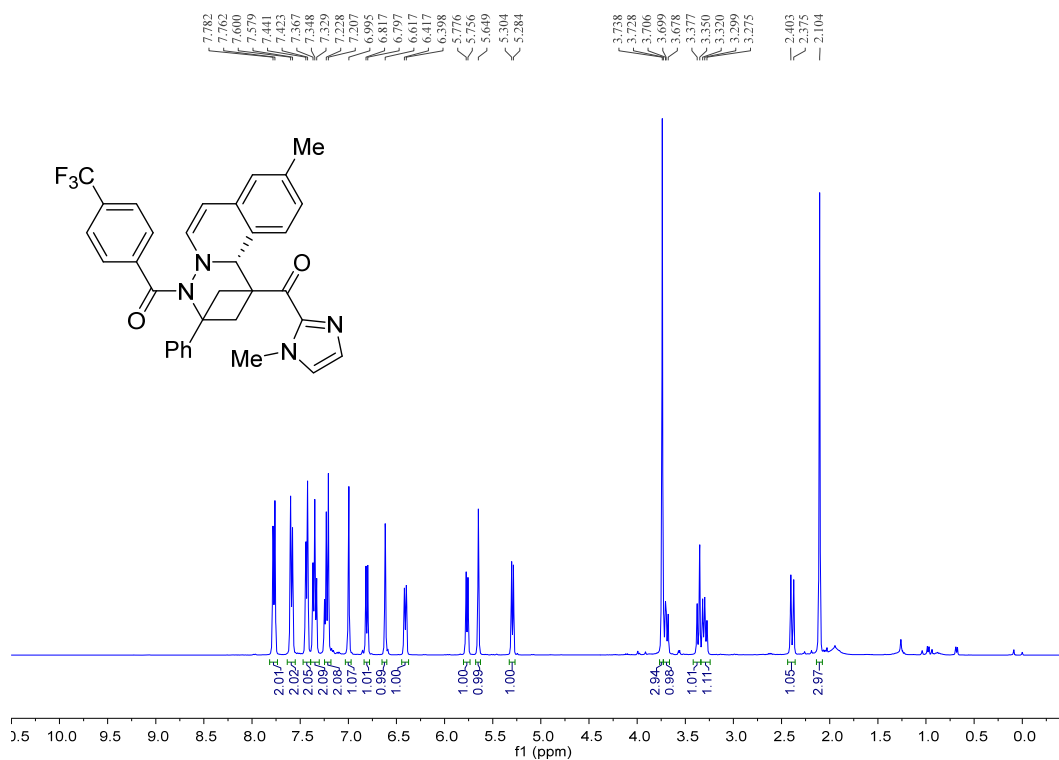 $^{13}\text{C}$  NMR (100 MHz,  $\text{CDCl}_3$ )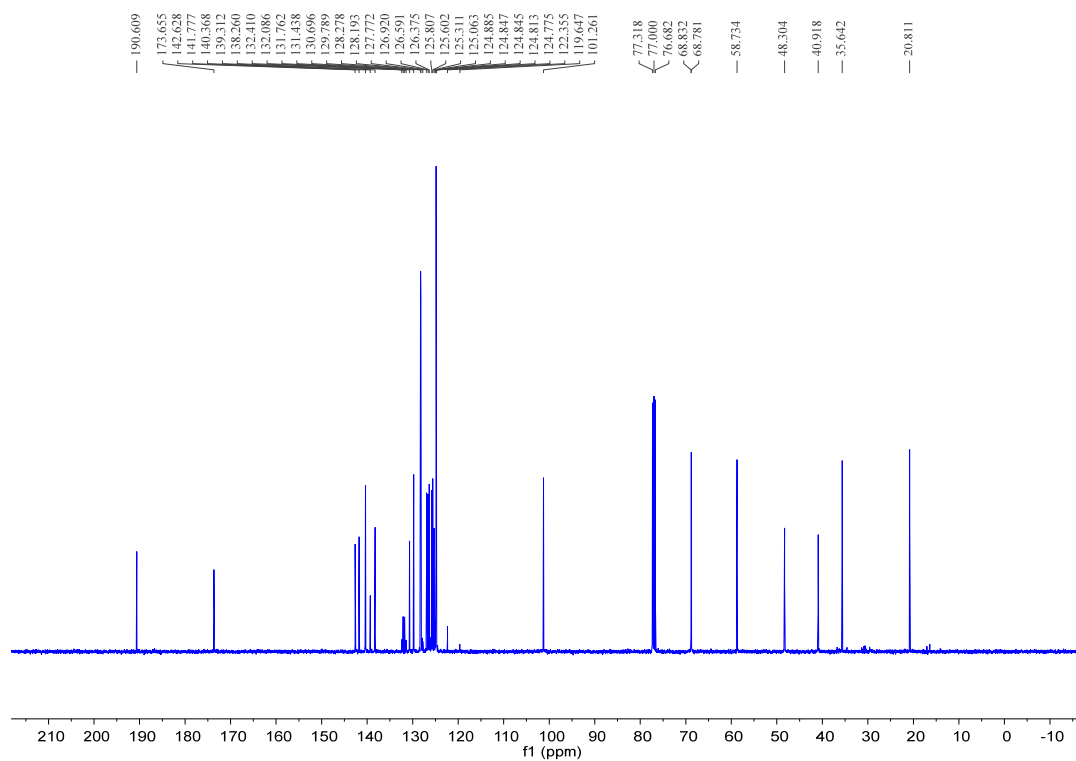



$^{13}\text{C}$  NMR (100 MHz,  $\text{CDCl}_3$ )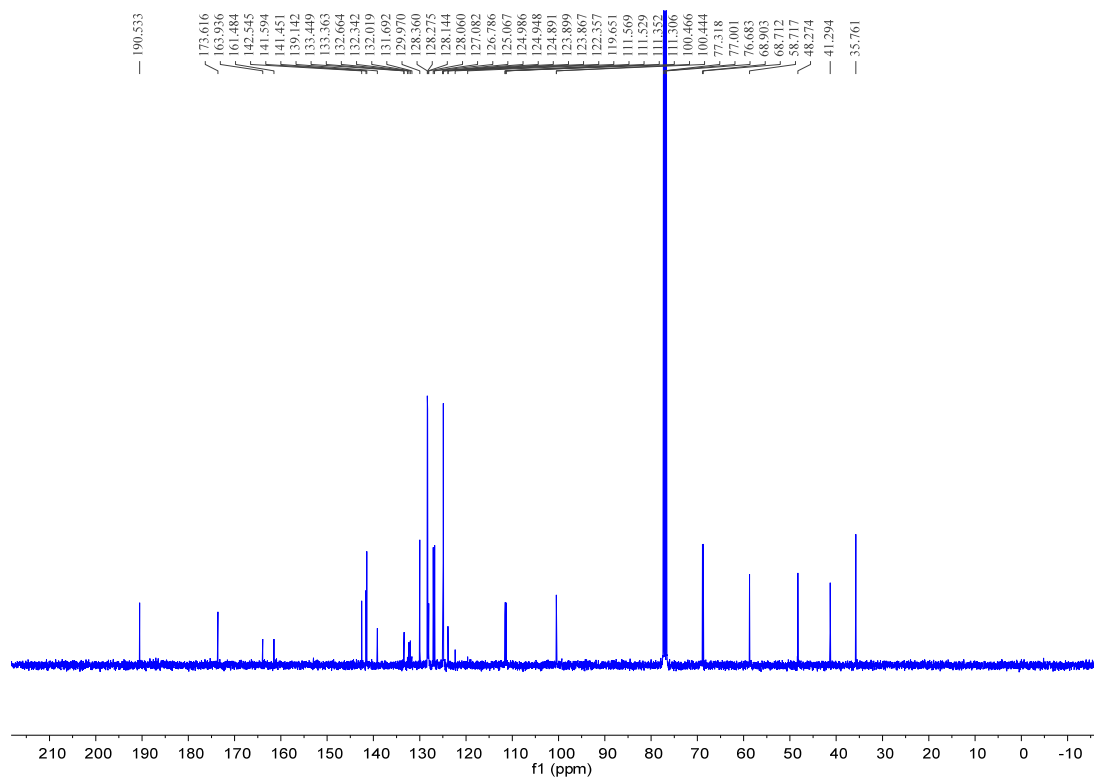 $^{19}\text{F}$  NMR (376 MHz,  $\text{CDCl}_3$ )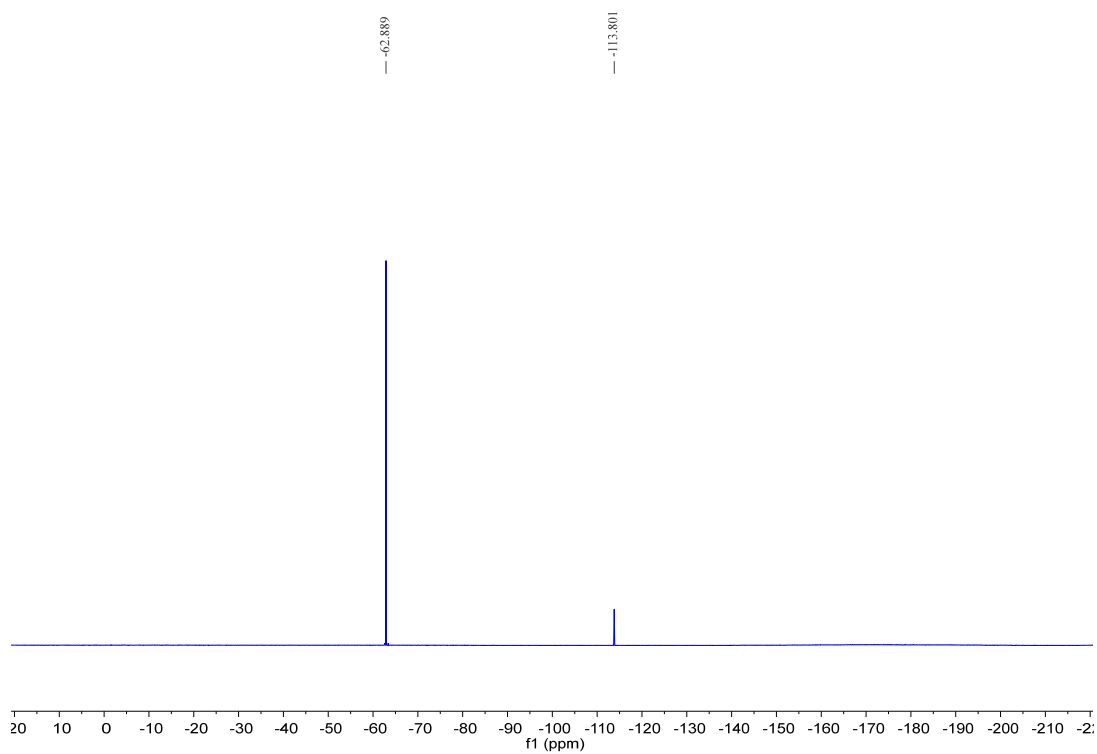

**$^1\text{H}$ ,  $^{13}\text{C}$  and  $^{19}\text{F}$  NMR Spectra for Compound (*R*)-3qv:** $^1\text{H}$  NMR (400 MHz,  $\text{CDCl}_3$ )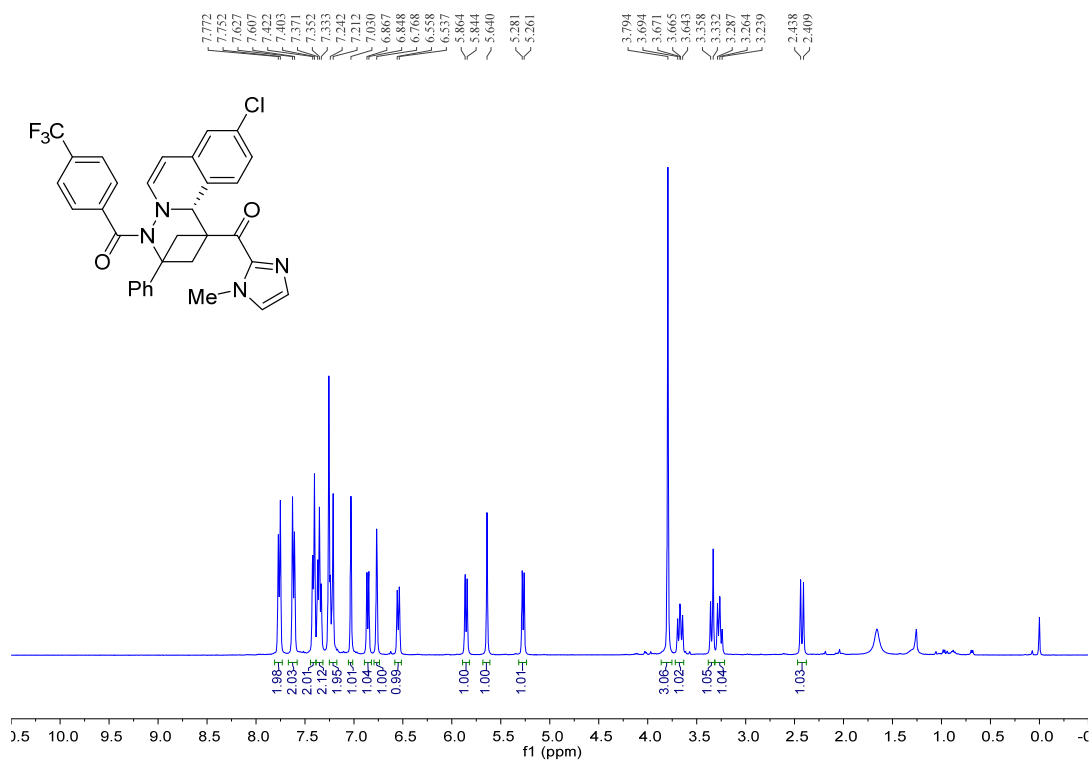 $^{13}\text{C}$  NMR (100 MHz,  $\text{CDCl}_3$ )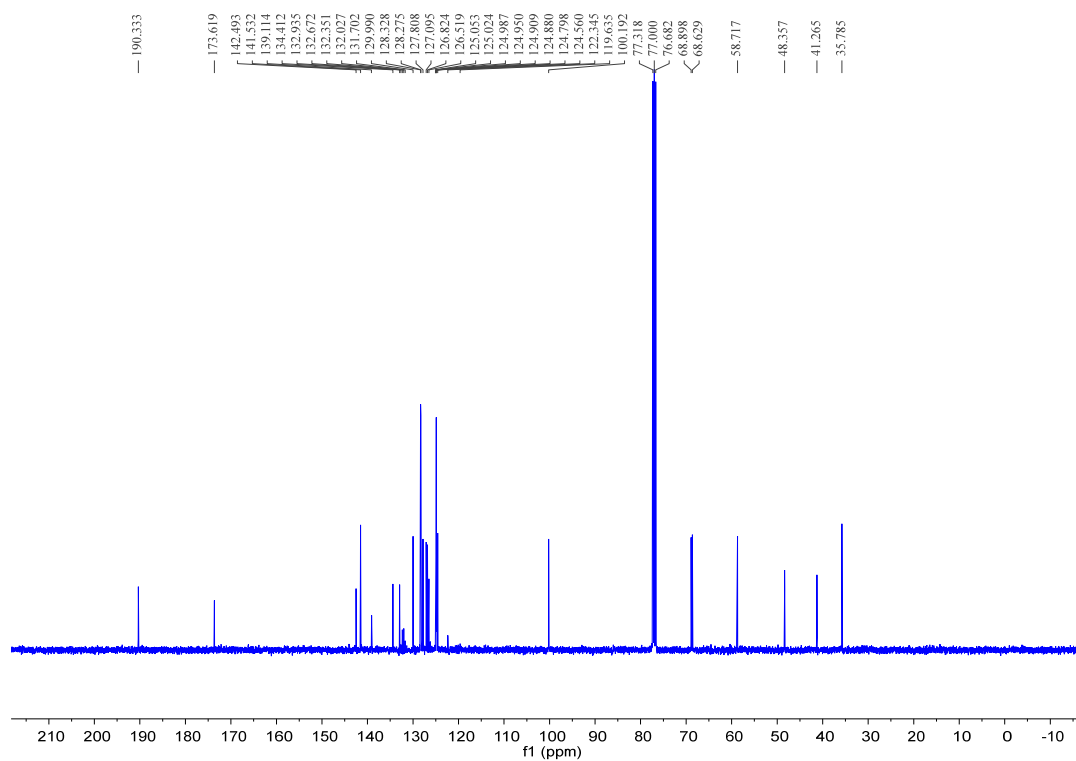

$^{19}\text{F}$  NMR (376 MHz,  $\text{CDCl}_3$ )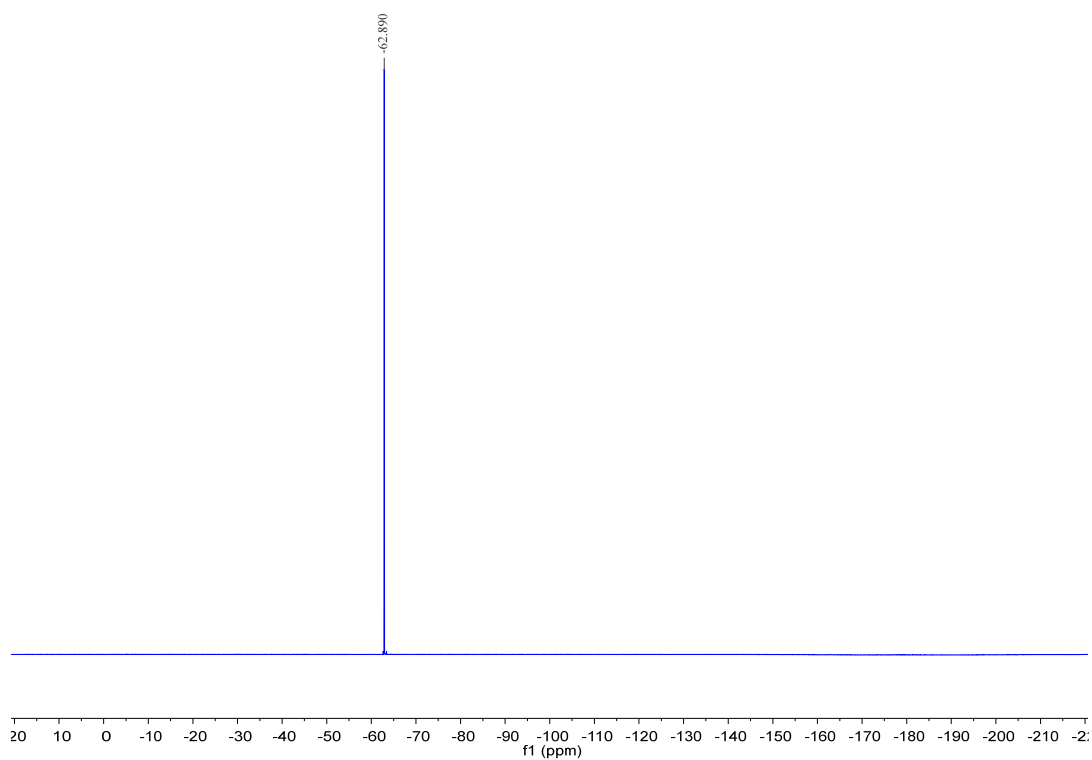 $^1\text{H}$ ,  $^{13}\text{C}$  and  $^{19}\text{F}$  NMR Spectra for Compound (*R*)-3qw: $^1\text{H}$  NMR (400 MHz,  $\text{CDCl}_3$ )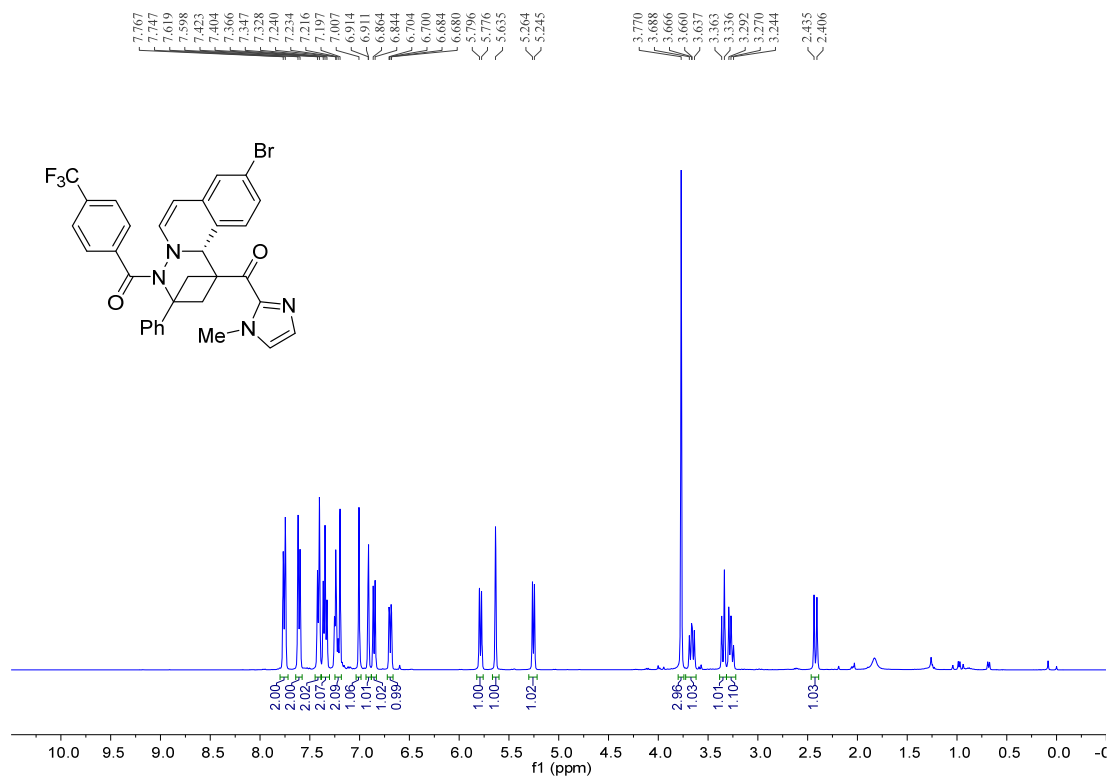

$^{13}\text{C}$  NMR (100 MHz,  $\text{CDCl}_3$ )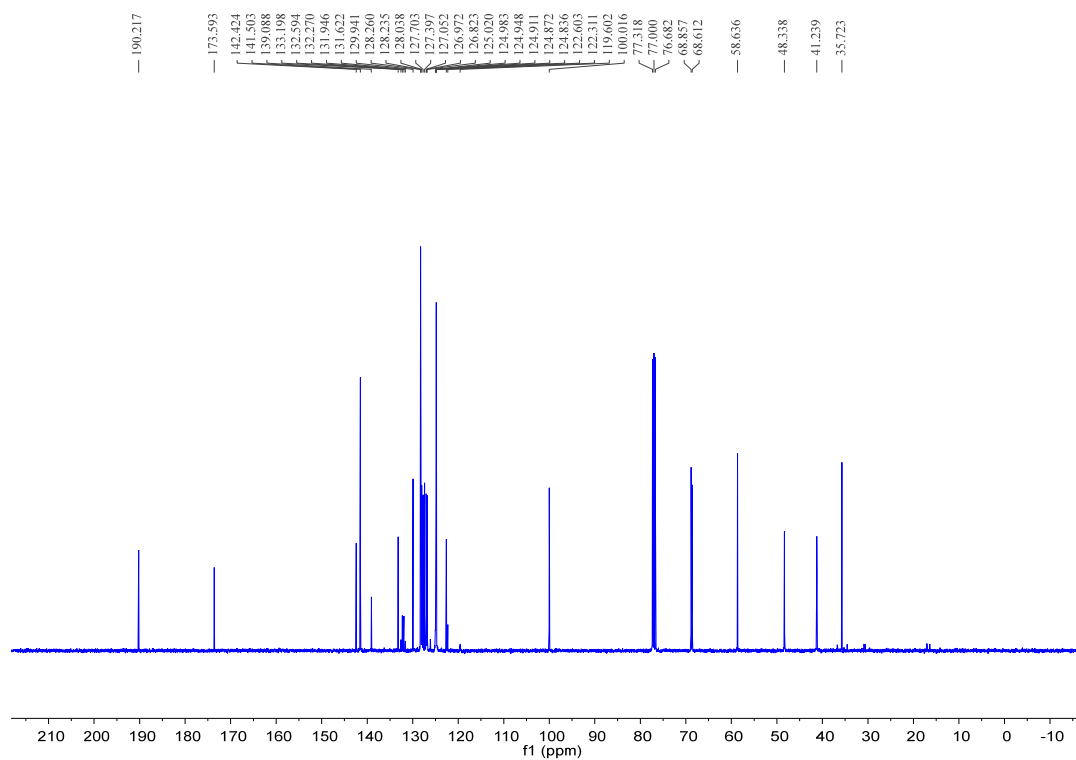 $^{19}\text{F}$  NMR (376 MHz,  $\text{CDCl}_3$ )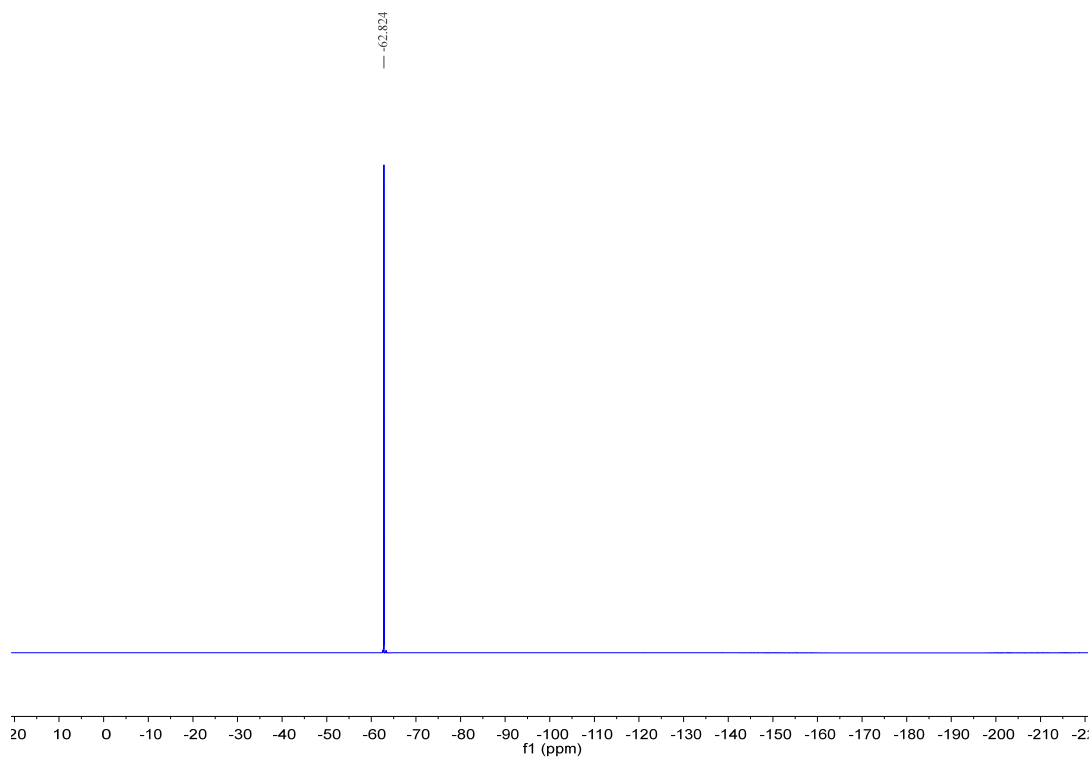

**$^1\text{H}$ ,  $^{13}\text{C}$  and  $^{19}\text{F}$  NMR Spectra for Compound (*R*)-3qx:** $^1\text{H}$  NMR (400 MHz,  $\text{CDCl}_3$ )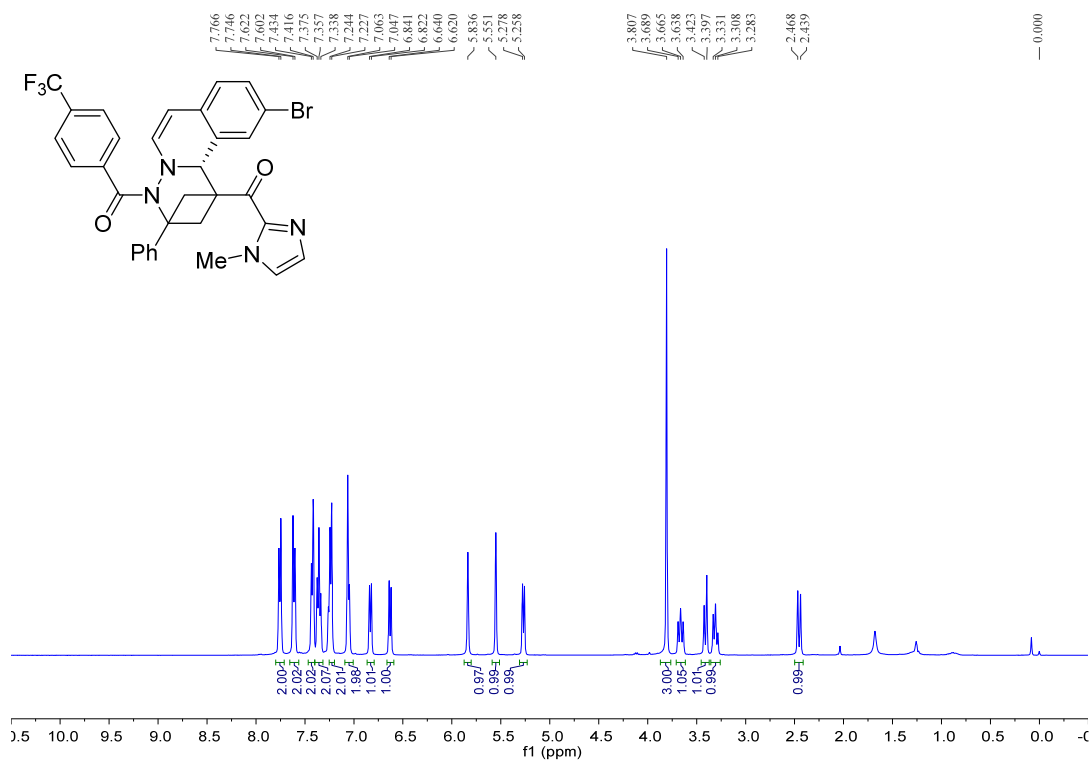 $^{13}\text{C}$  NMR (100 MHz,  $\text{CDCl}_3$ )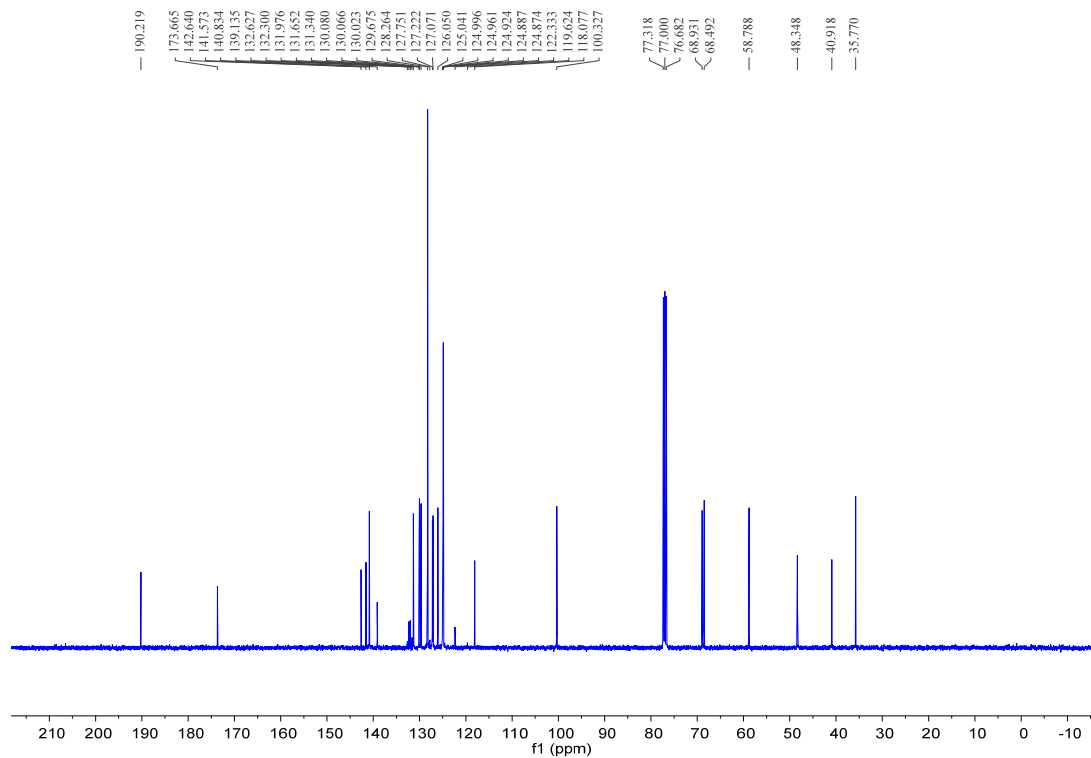

$^{19}\text{F}$  NMR (376 MHz,  $\text{CDCl}_3$ )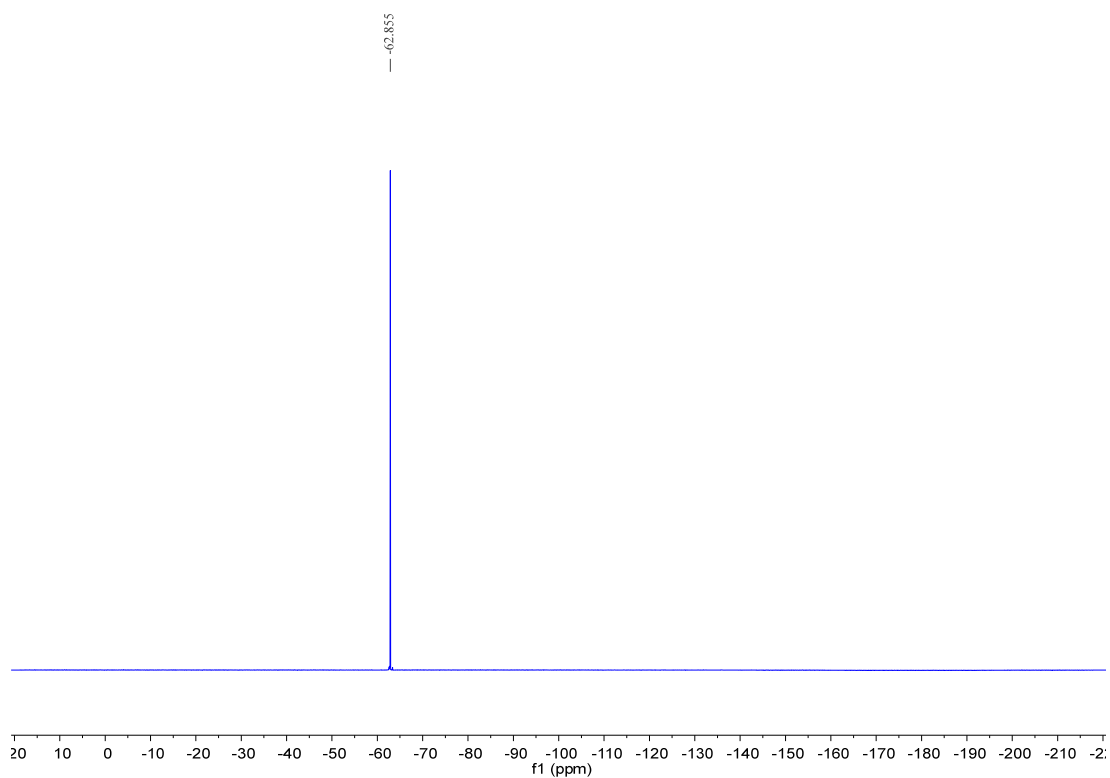 $^1\text{H}$ ,  $^{13}\text{C}$  and  $^{19}\text{F}$  NMR Spectra for Compound (S)-3qy: $^1\text{H}$  NMR (400 MHz,  $\text{CDCl}_3$ )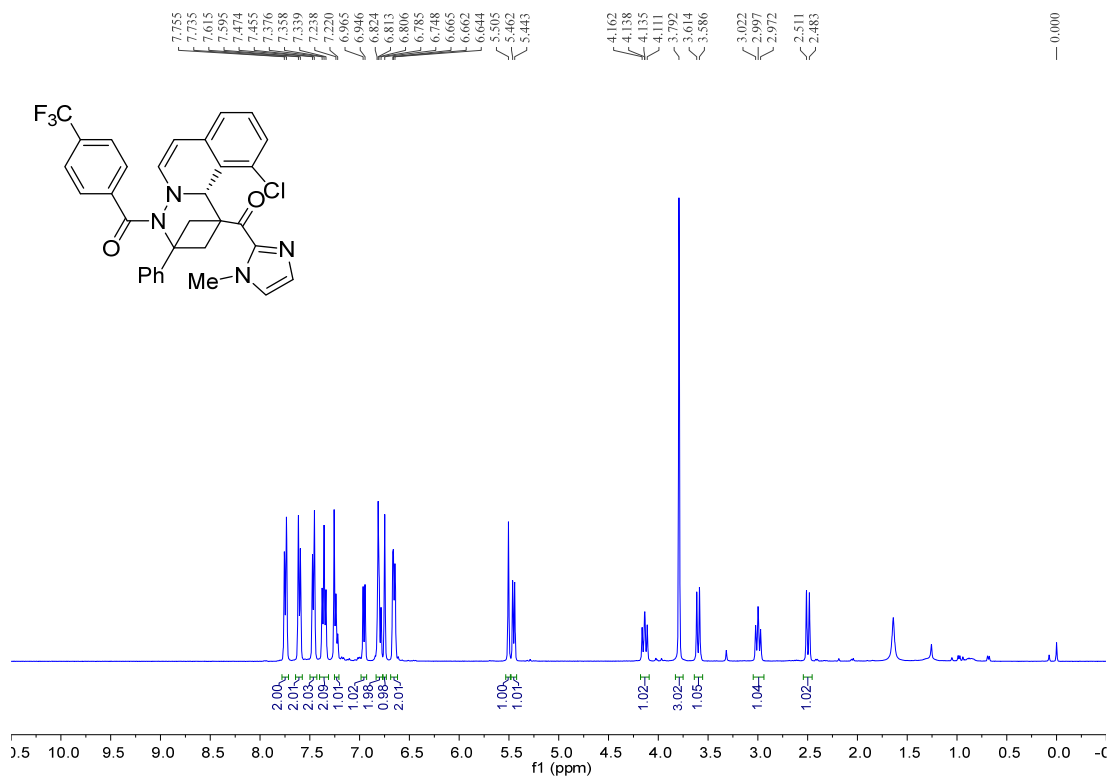



$^{13}\text{C}$  NMR (100 MHz,  $\text{CDCl}_3$ )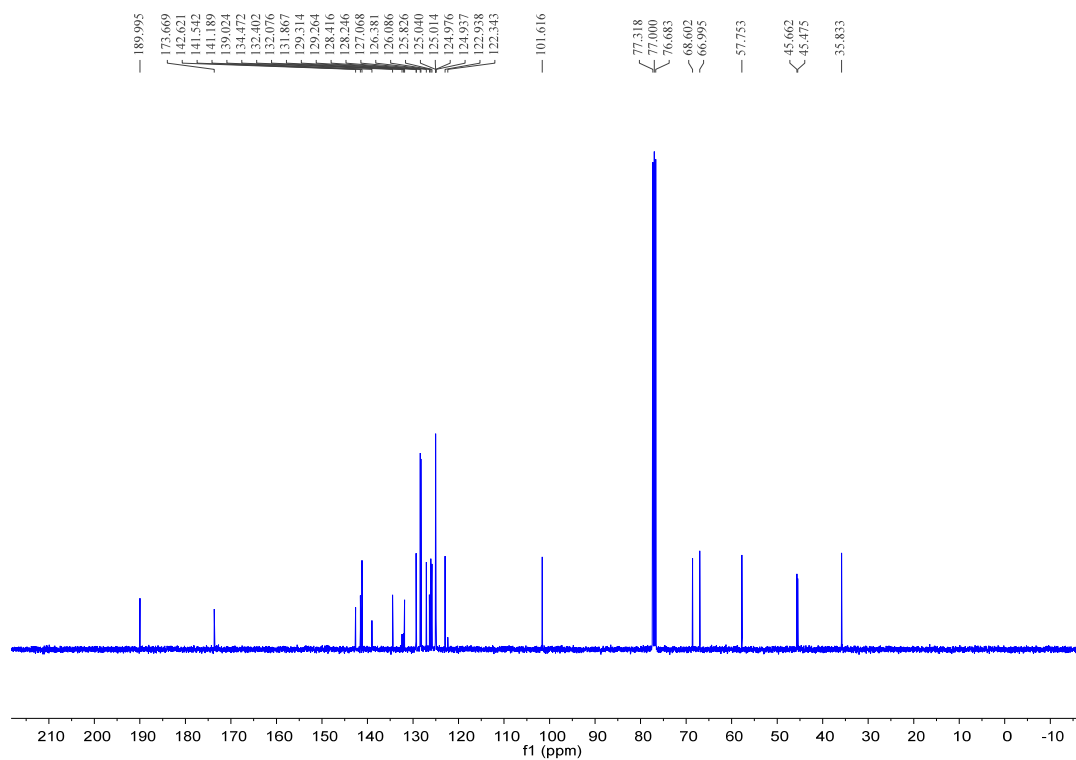 $^{19}\text{F}$  NMR (376 MHz,  $\text{CDCl}_3$ )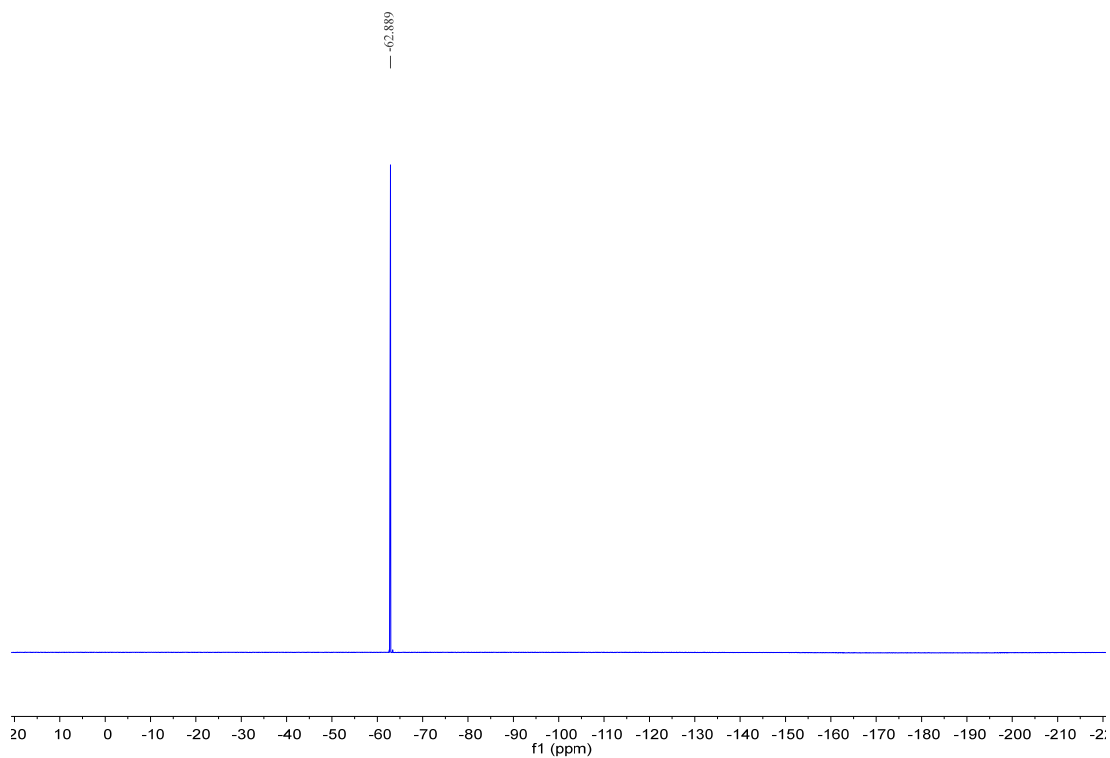

**$^1\text{H}$ ,  $^{13}\text{C}$  and  $^{19}\text{F}$  NMR Spectra for Compound (S)-3qz:** **$^1\text{H}$  NMR (400 MHz,  $\text{CDCl}_3$ )**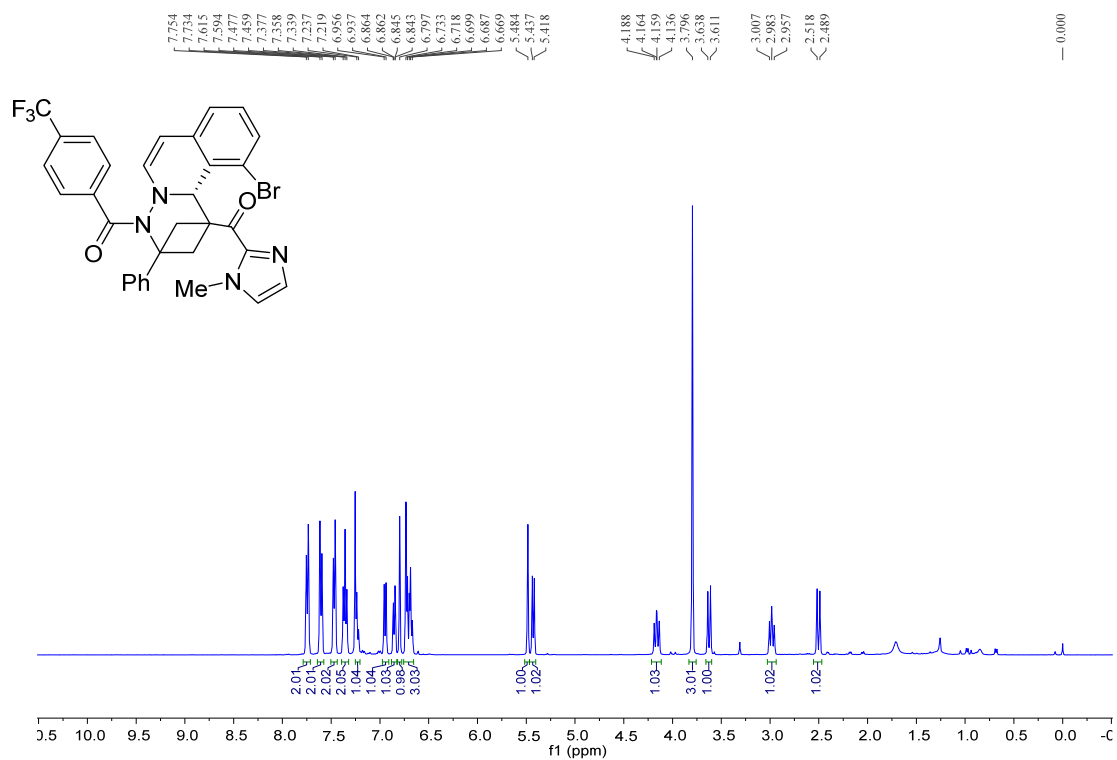 **$^{13}\text{C}$  NMR (100 MHz,  $\text{CDCl}_3$ )**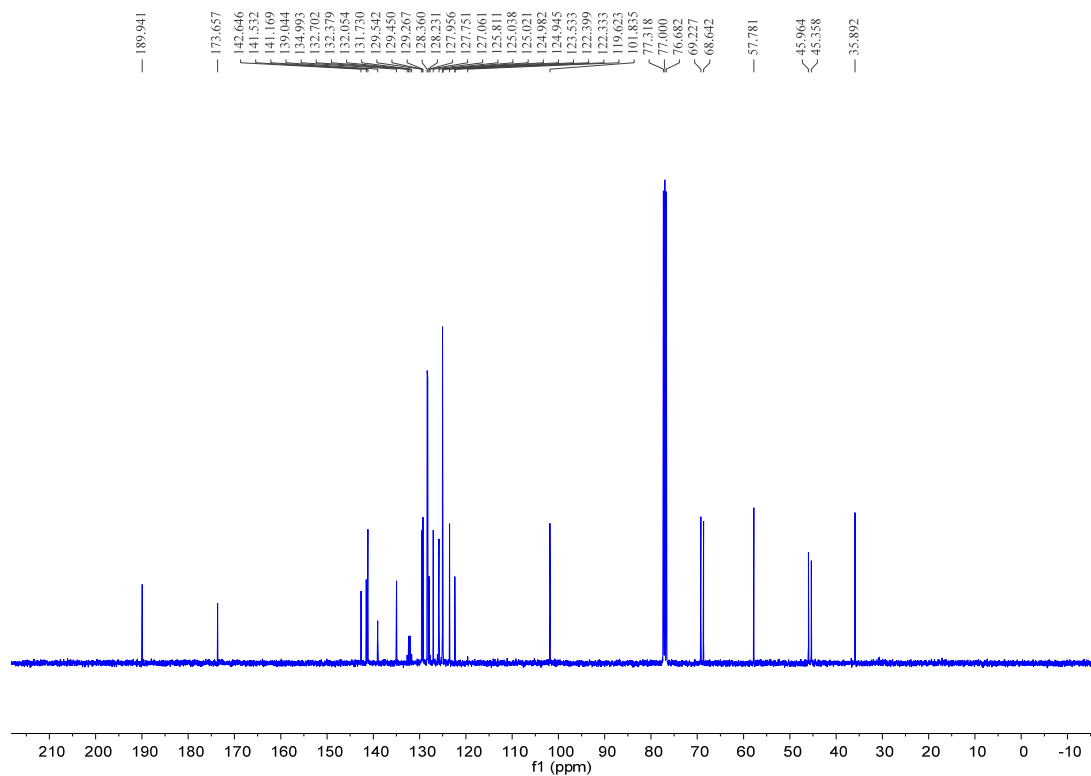

$^{19}\text{F}$  NMR (376 MHz,  $\text{CDCl}_3$ )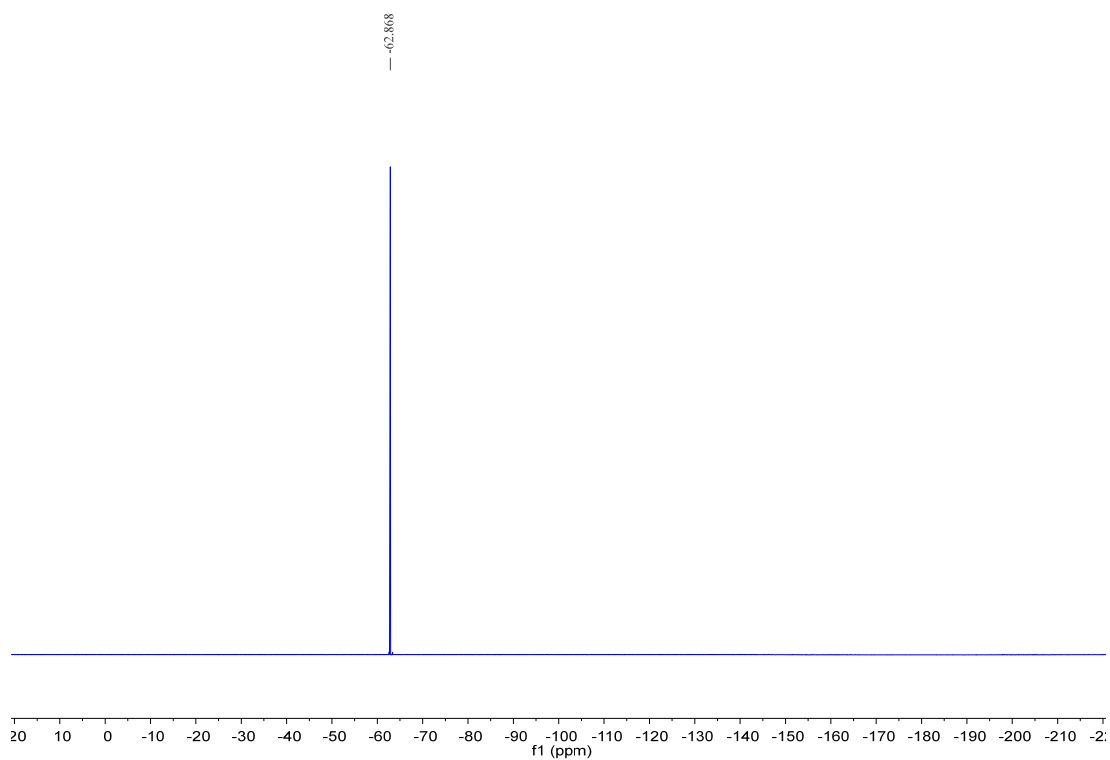 $^1\text{H}$  and  $^{13}\text{C}$  NMR Spectra for Compound 6: $^1\text{H}$  NMR (400 MHz,  $\text{CDCl}_3$ )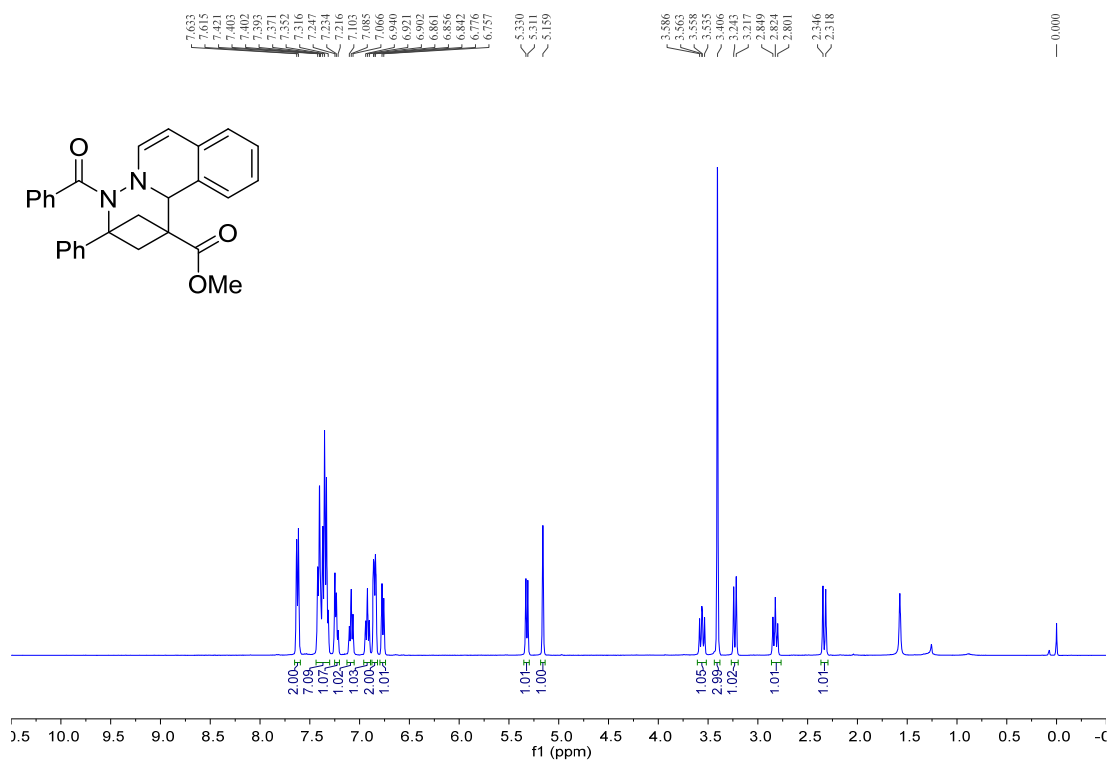

$^{13}\text{C}$  NMR (100 MHz,  $\text{CDCl}_3$ )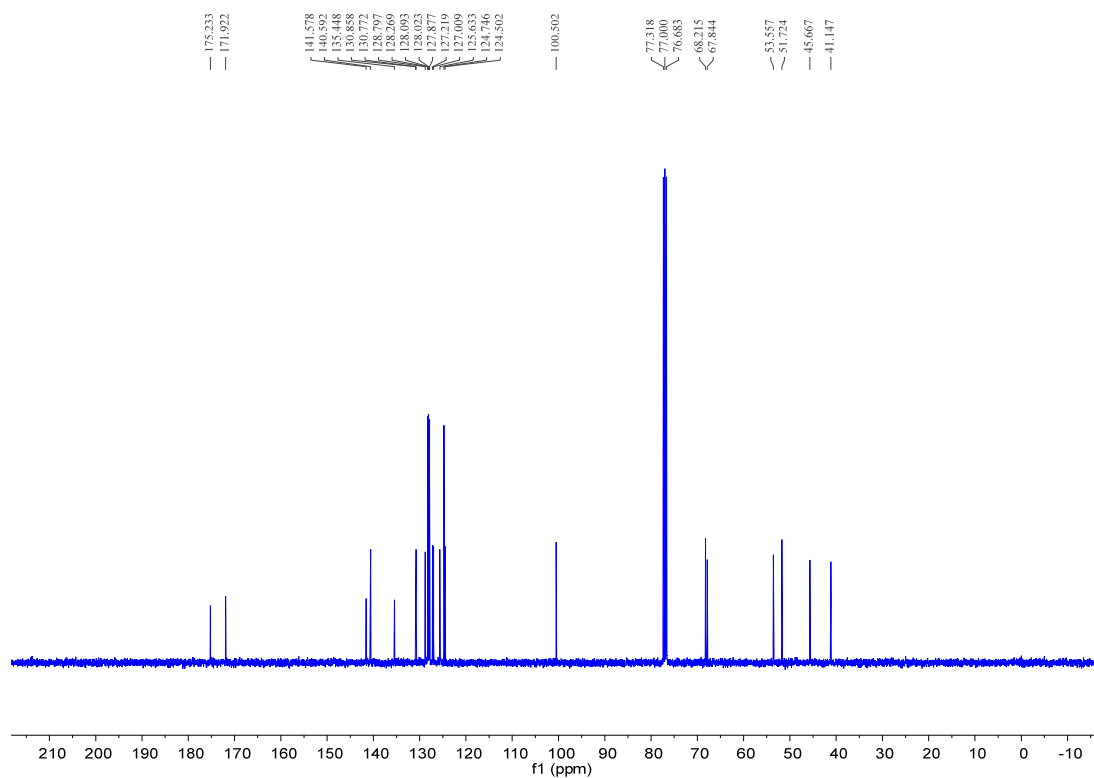 $^1\text{H}$  and  $^{13}\text{C}$  NMR Spectra for Compound 7: $^1\text{H}$  NMR (400 MHz,  $\text{CDCl}_3$ )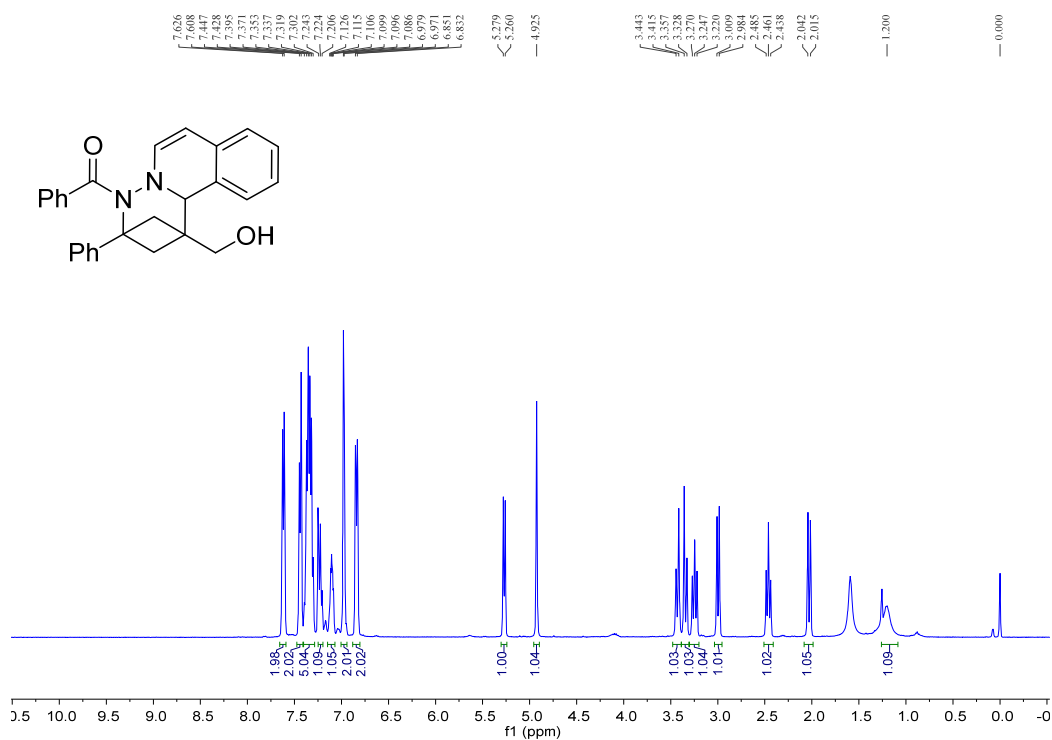

$^{13}\text{C}$  NMR (100 MHz,  $\text{CDCl}_3$ )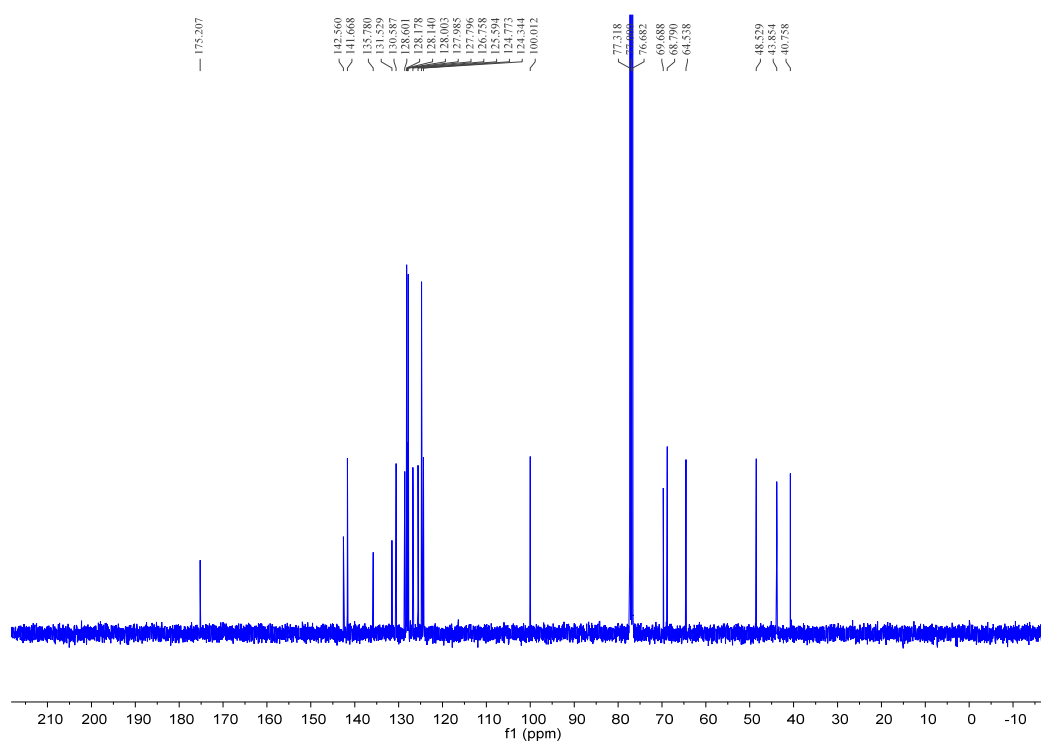 $^1\text{H}$  and  $^{13}\text{C}$  NMR Spectra for Compound 8: $^1\text{H}$  NMR (400 MHz,  $\text{CDCl}_3$ )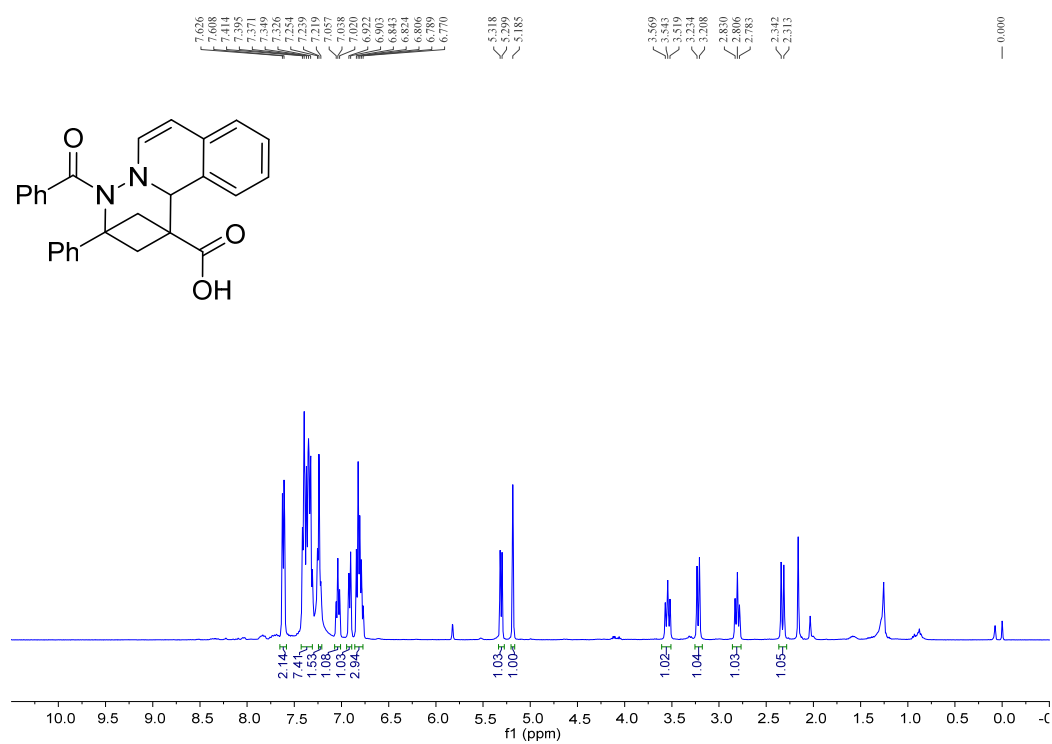

$^{13}\text{C}$  NMR (100 MHz,  $\text{CDCl}_3$ )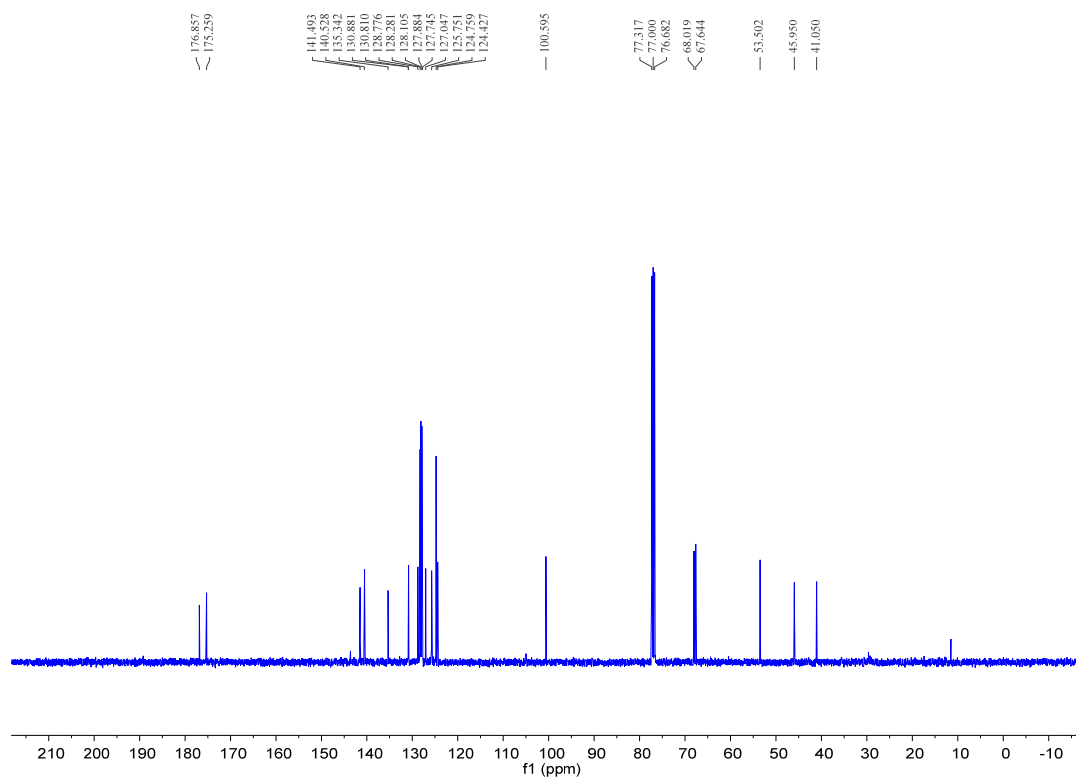 $^1\text{H}$  and  $^{13}\text{C}$  NMR Spectra for Compound 9: $^1\text{H}$  NMR (400 MHz,  $\text{CDCl}_3$ )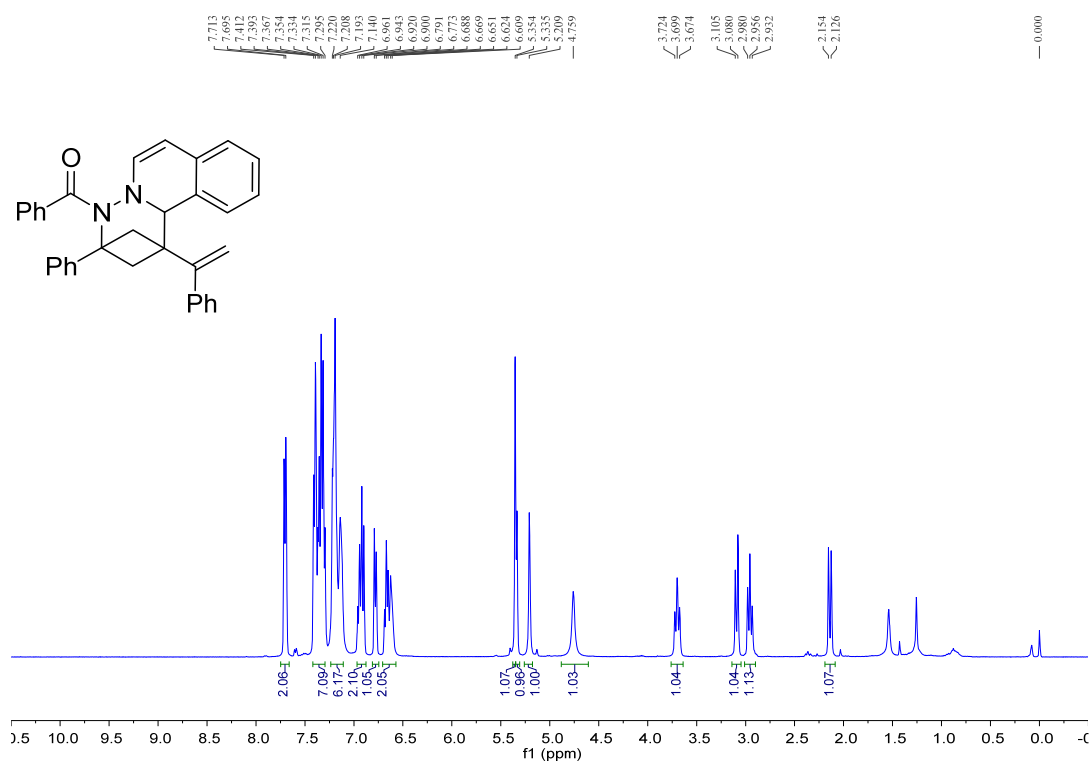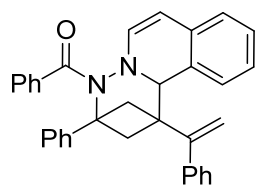

$^{13}\text{C}$  NMR (100 MHz,  $\text{CDCl}_3$ )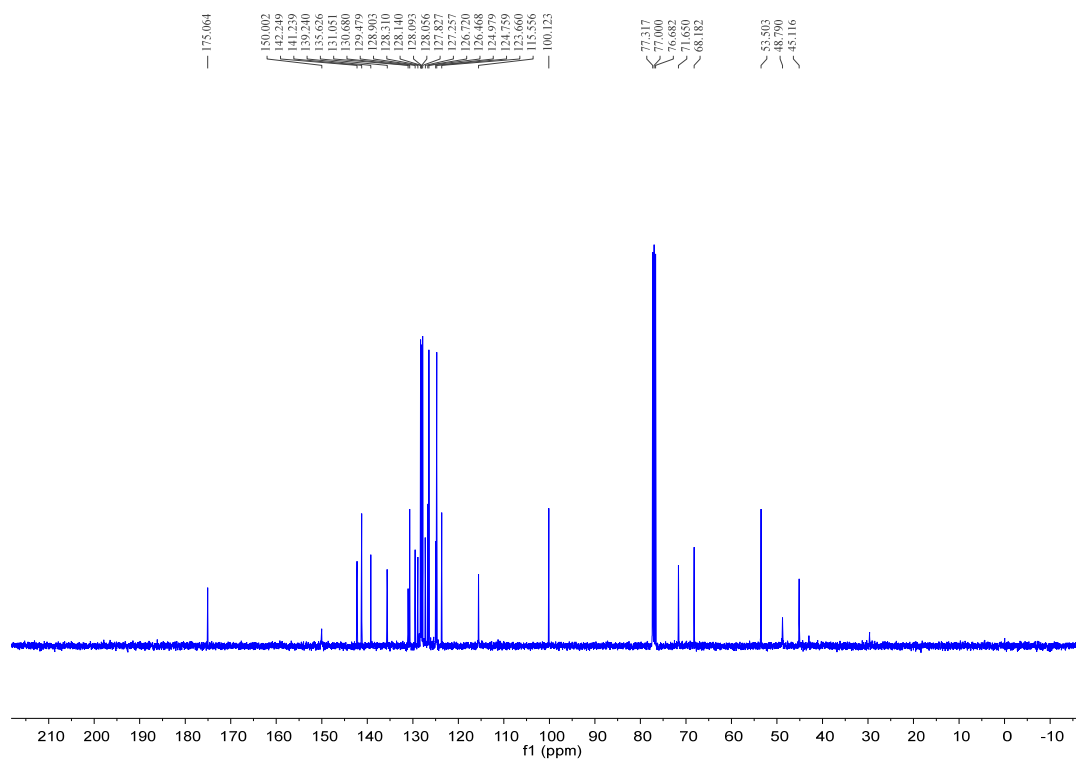 $^1\text{H}$  and  $^{13}\text{C}$  NMR Spectra for Compound 10 (the major isomer): $^1\text{H}$  NMR (400 MHz,  $\text{CDCl}_3$ )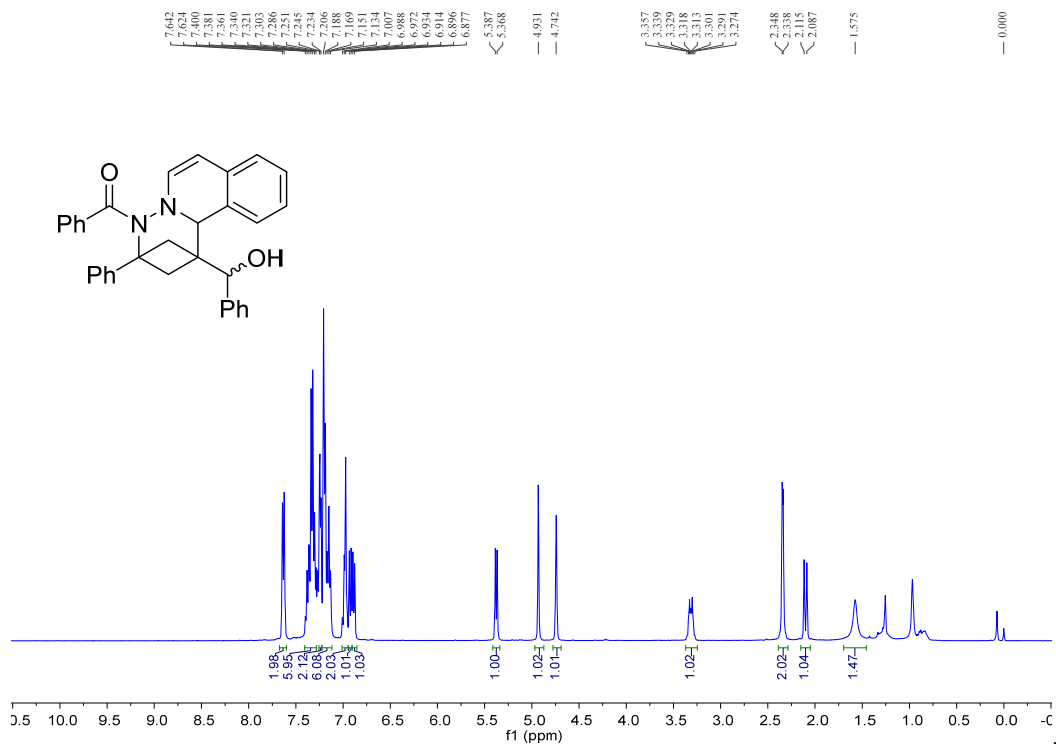

$^{13}\text{C}$  NMR (100 MHz,  $\text{CDCl}_3$ )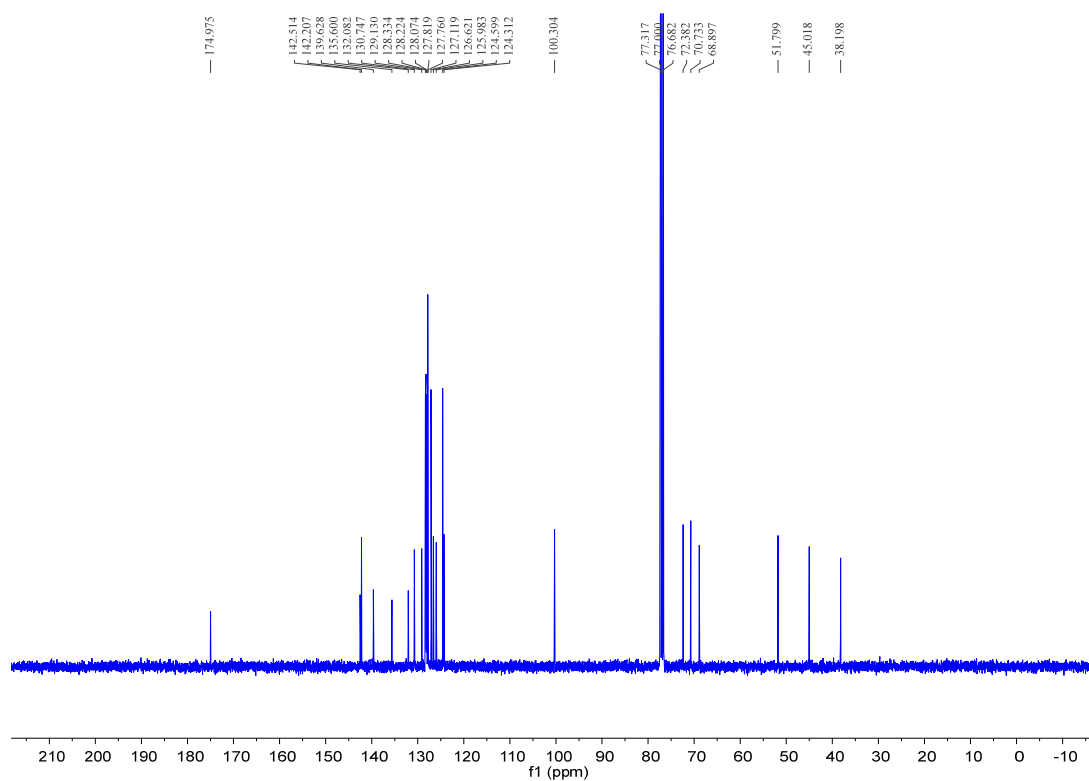 $^1\text{H}$ ,  $^{13}\text{C}$  and  $^{19}\text{F}$  NMR Spectra for Compound 11: $^1\text{H}$  NMR (400 MHz,  $\text{CDCl}_3$ )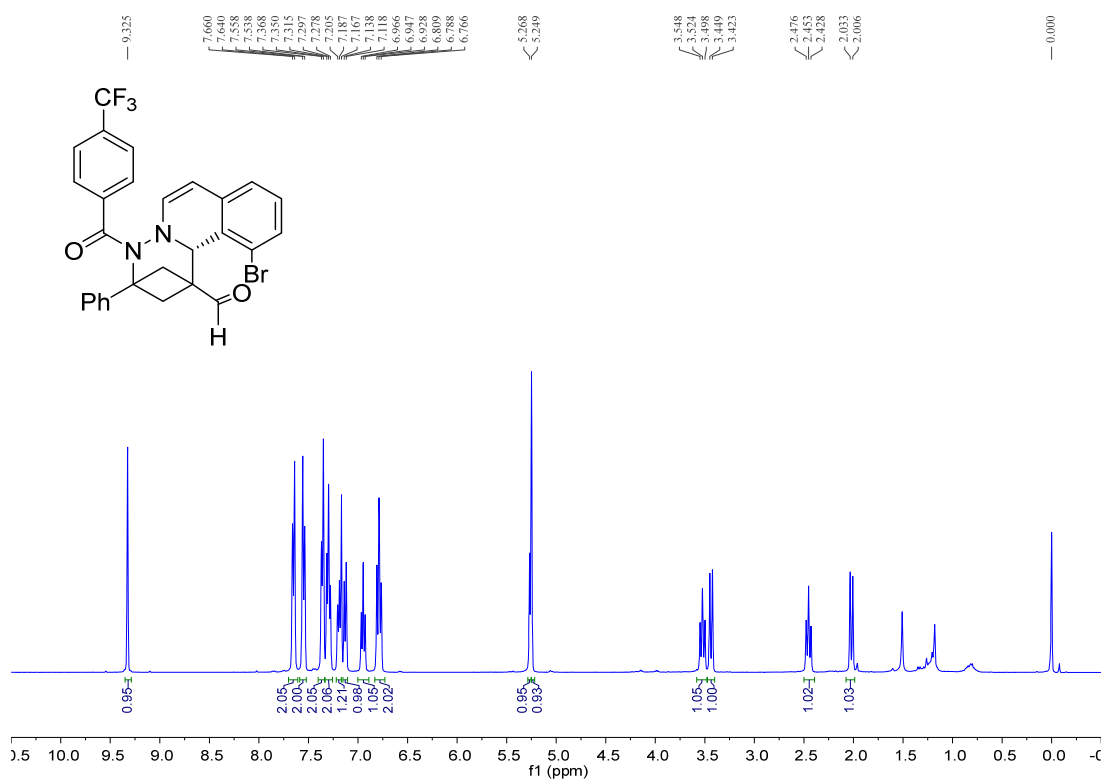



$^1\text{H}$  NMR (400 MHz,  $\text{CDCl}_3$ )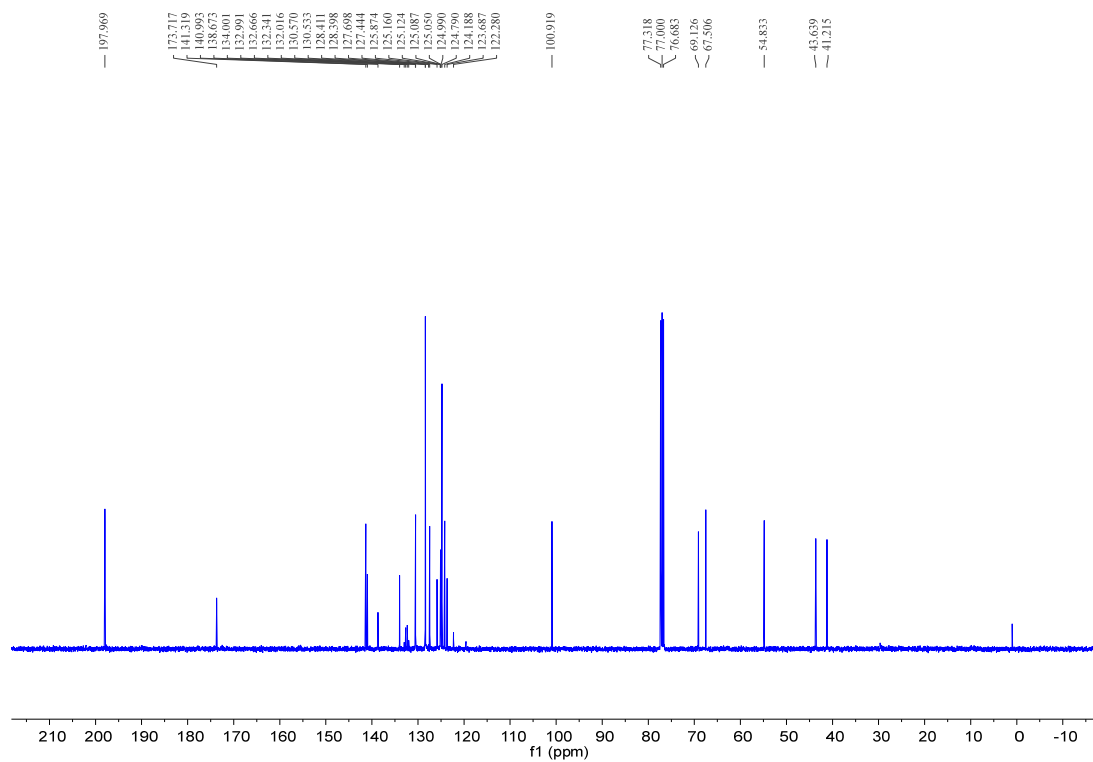 $^{19}\text{F}$  NMR (376 MHz,  $\text{CDCl}_3$ )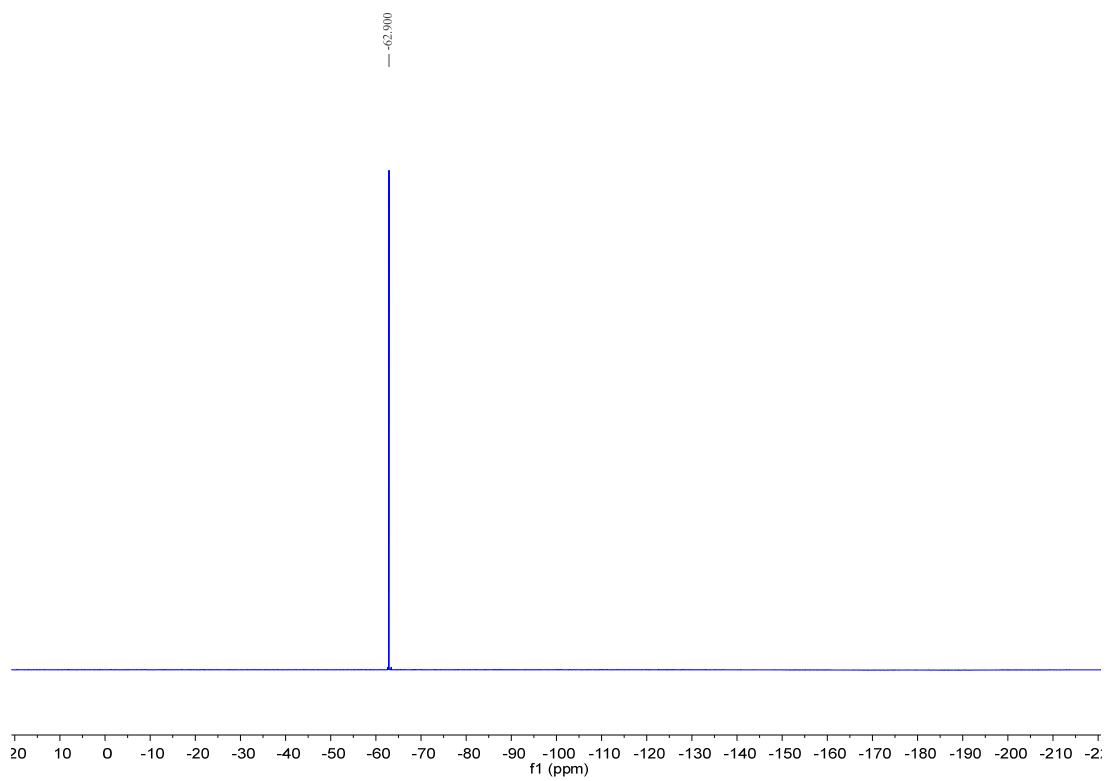

**$^1\text{H}$ ,  $^{13}\text{C}$  and  $^{19}\text{F}$  NMR Spectra for Compound (*R*)-3aad:** **$^1\text{H}$  NMR (400 MHz,  $\text{CDCl}_3$ )**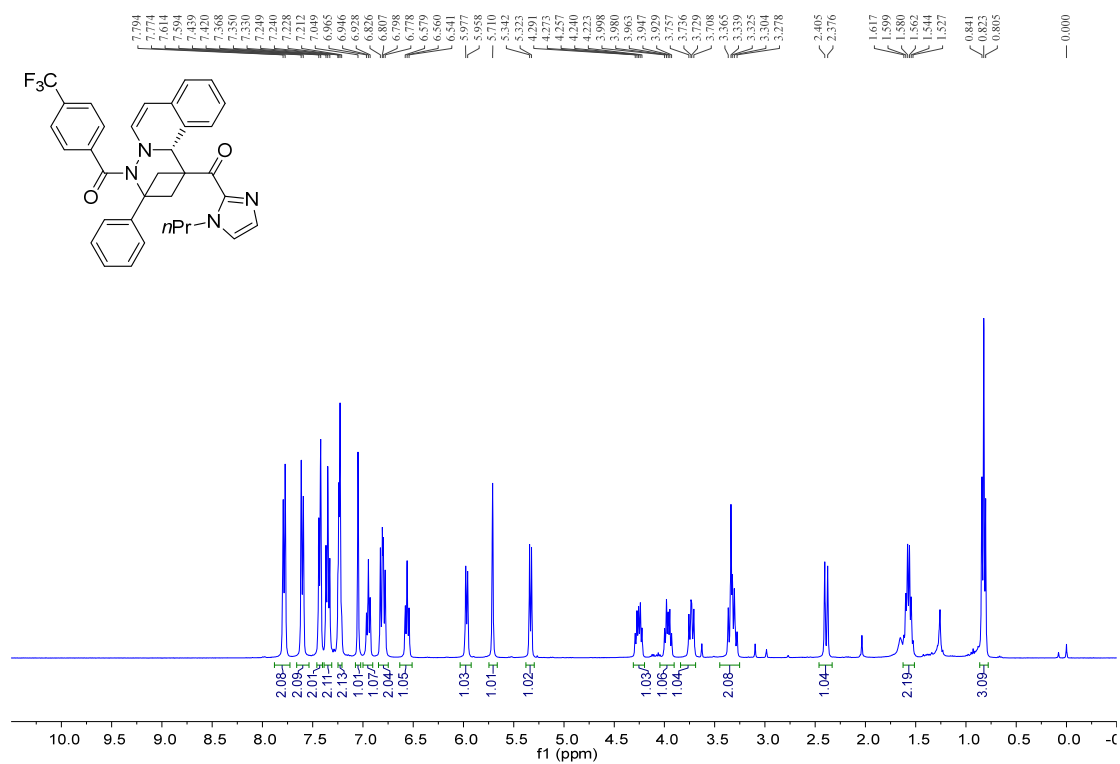 **$^{13}\text{C}$  NMR (100 MHz,  $\text{CDCl}_3$ )**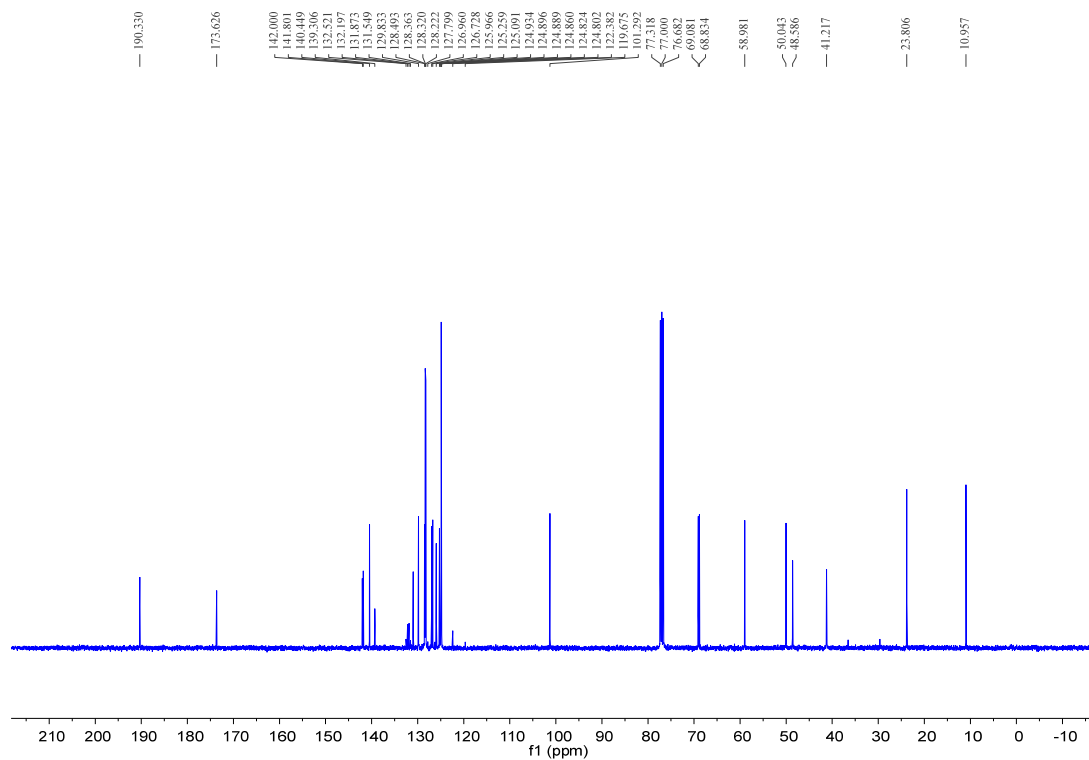

$^{19}\text{F}$  NMR (376 MHz,  $\text{CDCl}_3$ )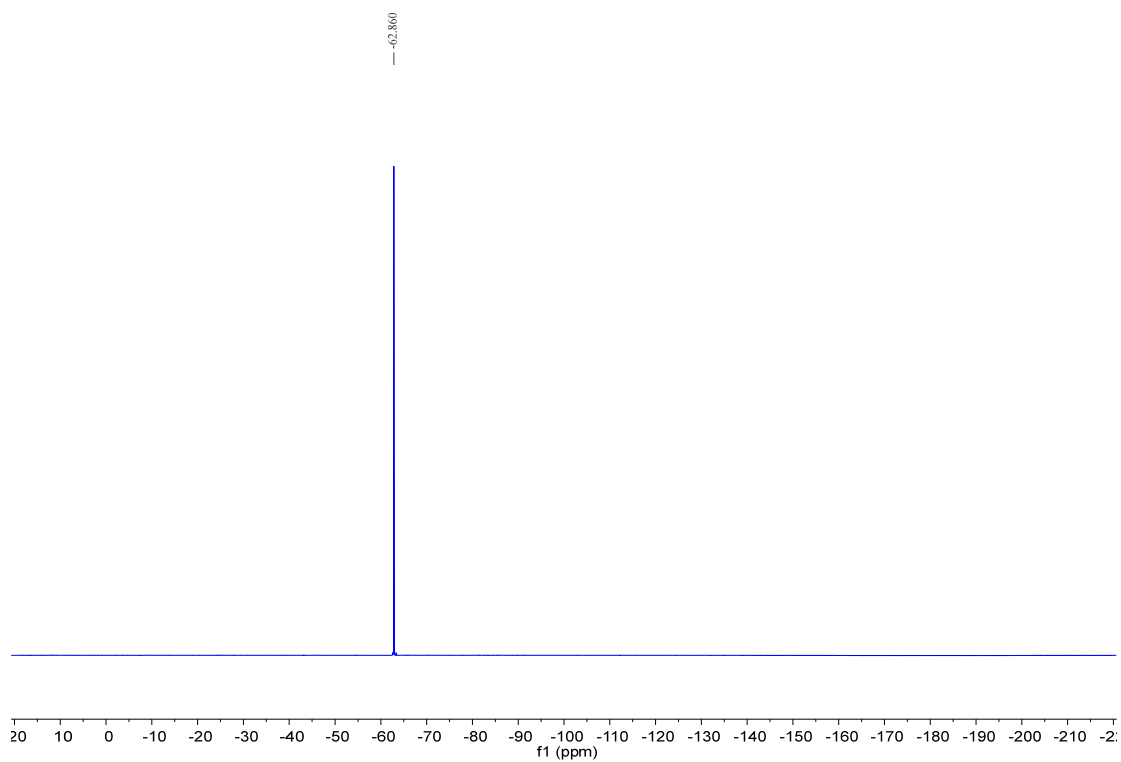 $^1\text{H}$ ,  $^{13}\text{C}$  and  $^{19}\text{F}$  NMR Spectra for Compound (*R*)-3ccd: $^1\text{H}$  NMR (400 MHz,  $\text{CDCl}_3$ )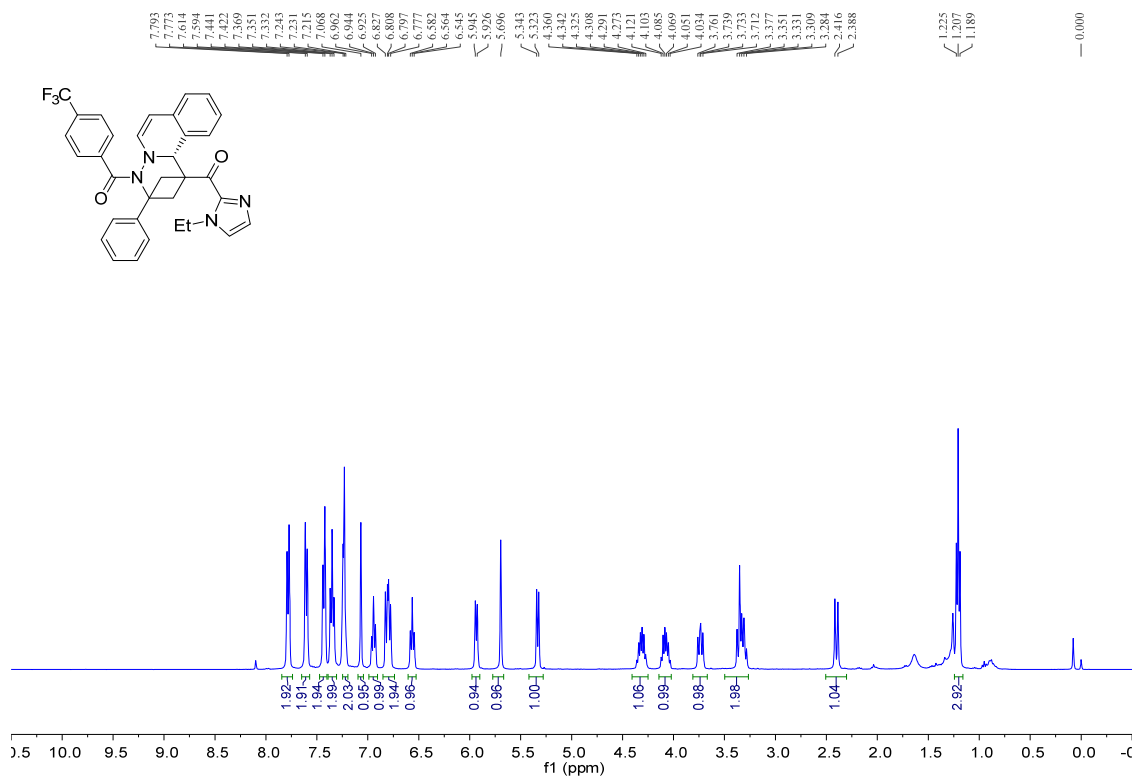

$^{13}\text{C}$  NMR (100 MHz,  $\text{CDCl}_3$ )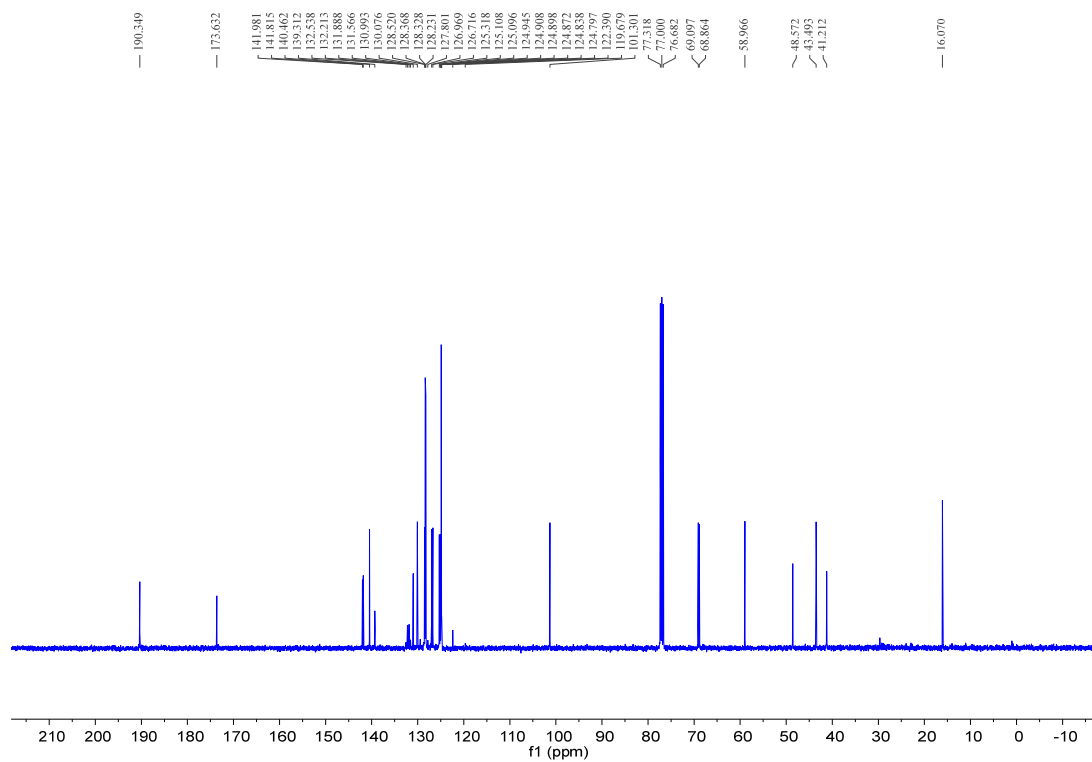 $^{19}\text{F}$  NMR (376 MHz,  $\text{CDCl}_3$ )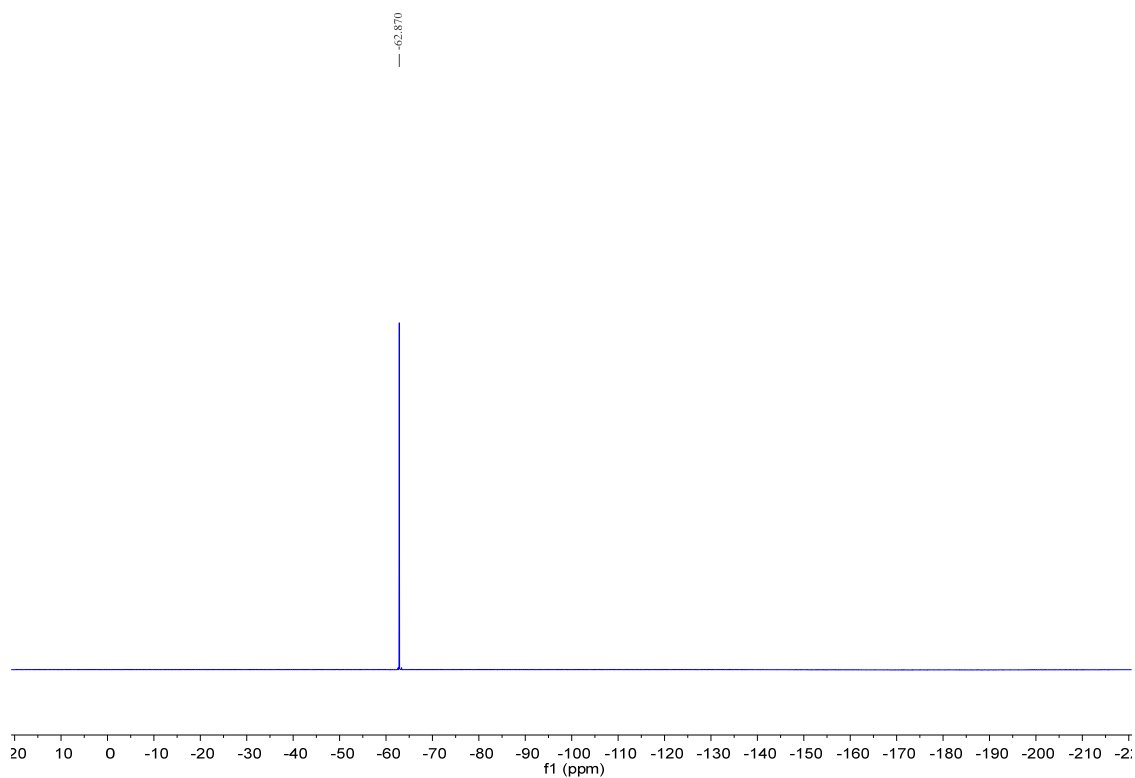

**$^1\text{H}$ ,  $^{13}\text{C}$  and  $^{19}\text{F}$  NMR Spectra for Compound (*R*)-3ddd:** **$^1\text{H}$  NMR (400 MHz,  $\text{CDCl}_3$ )**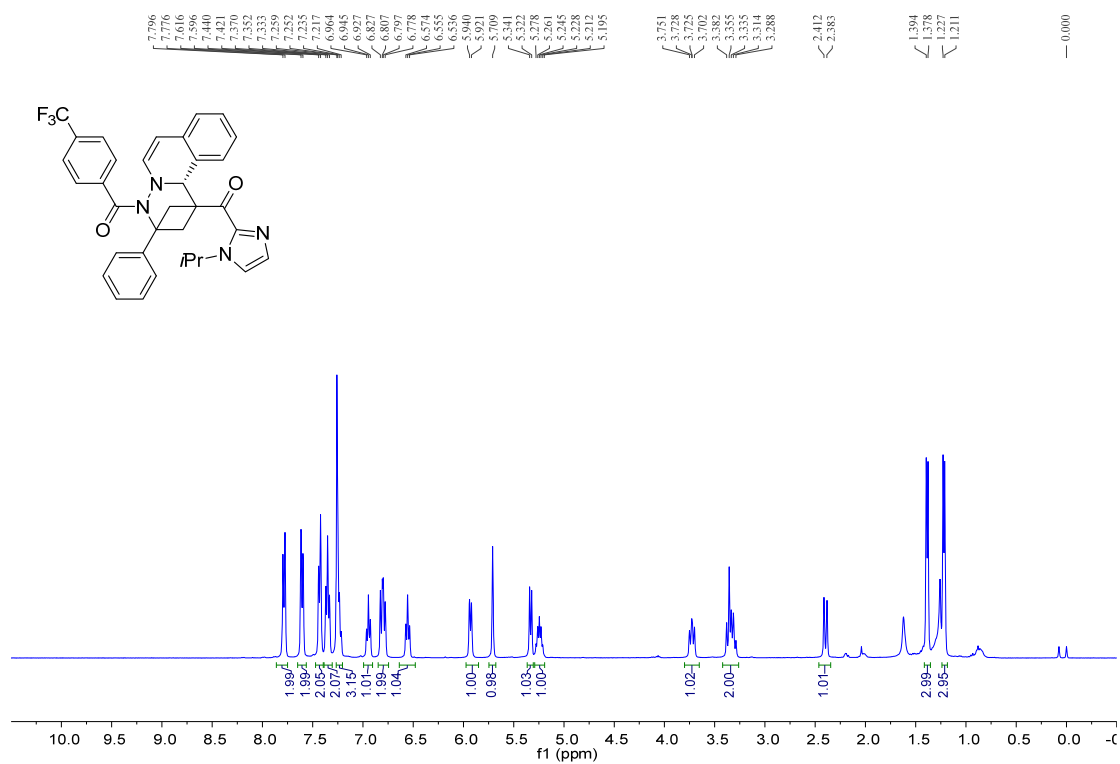 **$^{13}\text{C}$  NMR (100 MHz,  $\text{CDCl}_3$ )**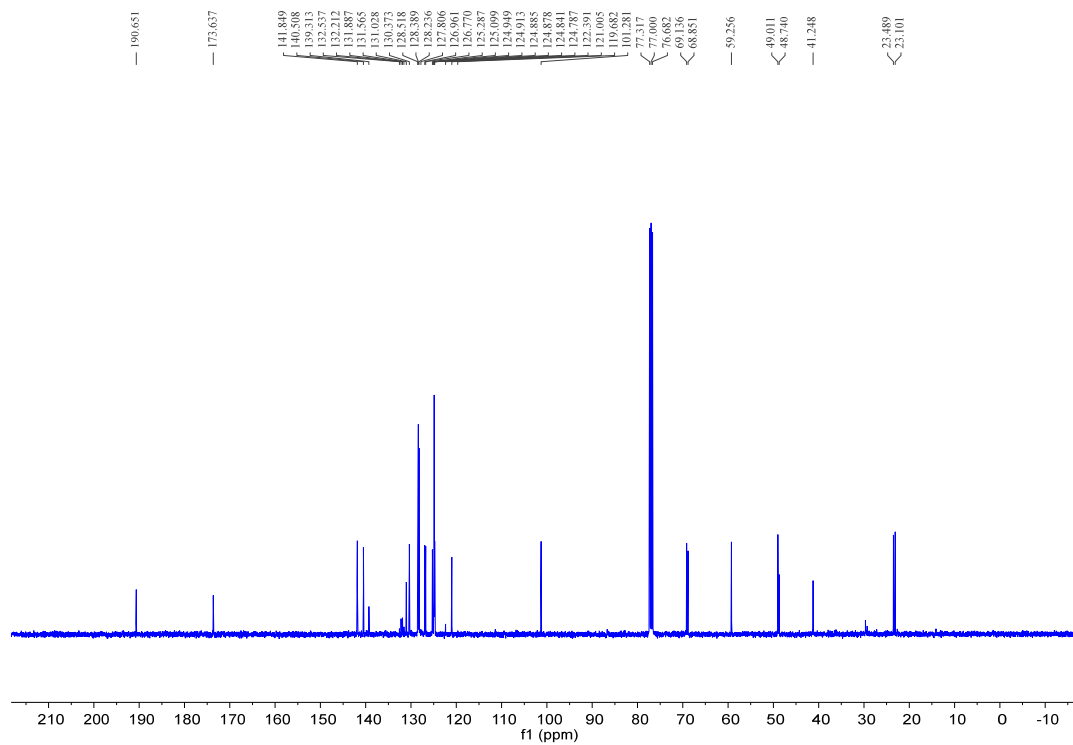

$^{19}\text{F}$  NMR (376 MHz,  $\text{CDCl}_3$ )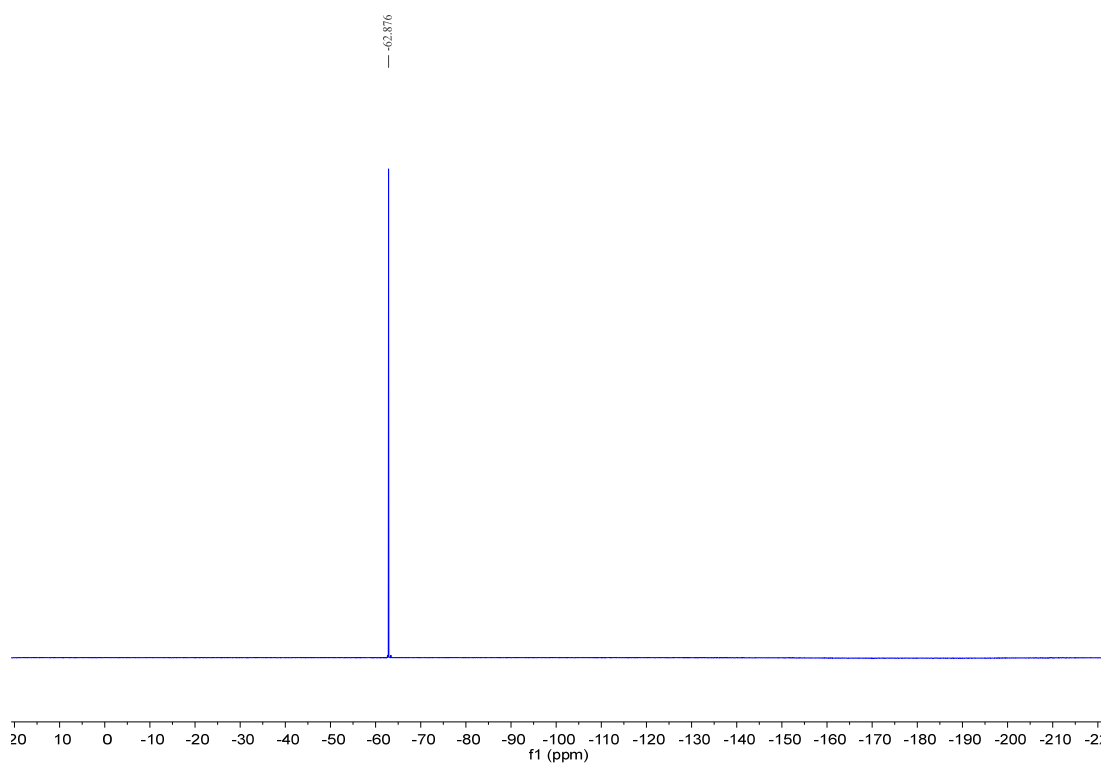 $^1\text{H}$ ,  $^{13}\text{C}$  and  $^{19}\text{F}$  NMR Spectra for Compound 3gd: $^1\text{H}$  NMR (400 MHz,  $\text{CDCl}_3$ )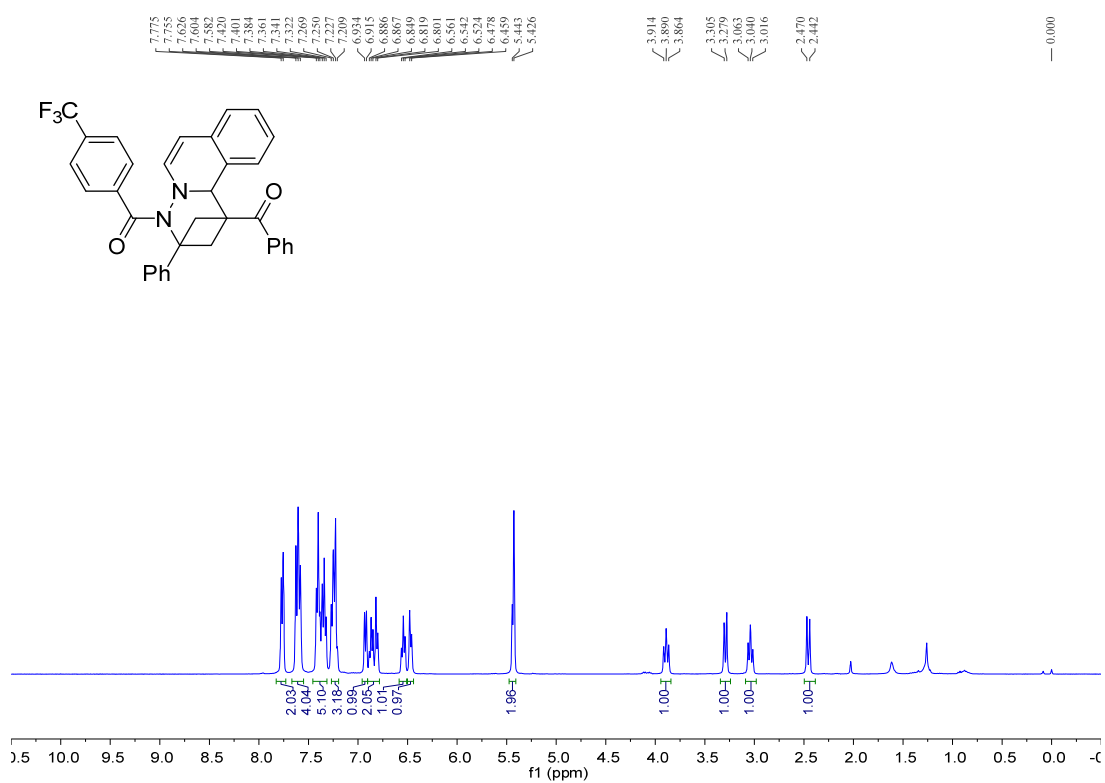

$^{13}\text{C}$  NMR (100 MHz,  $\text{CDCl}_3$ )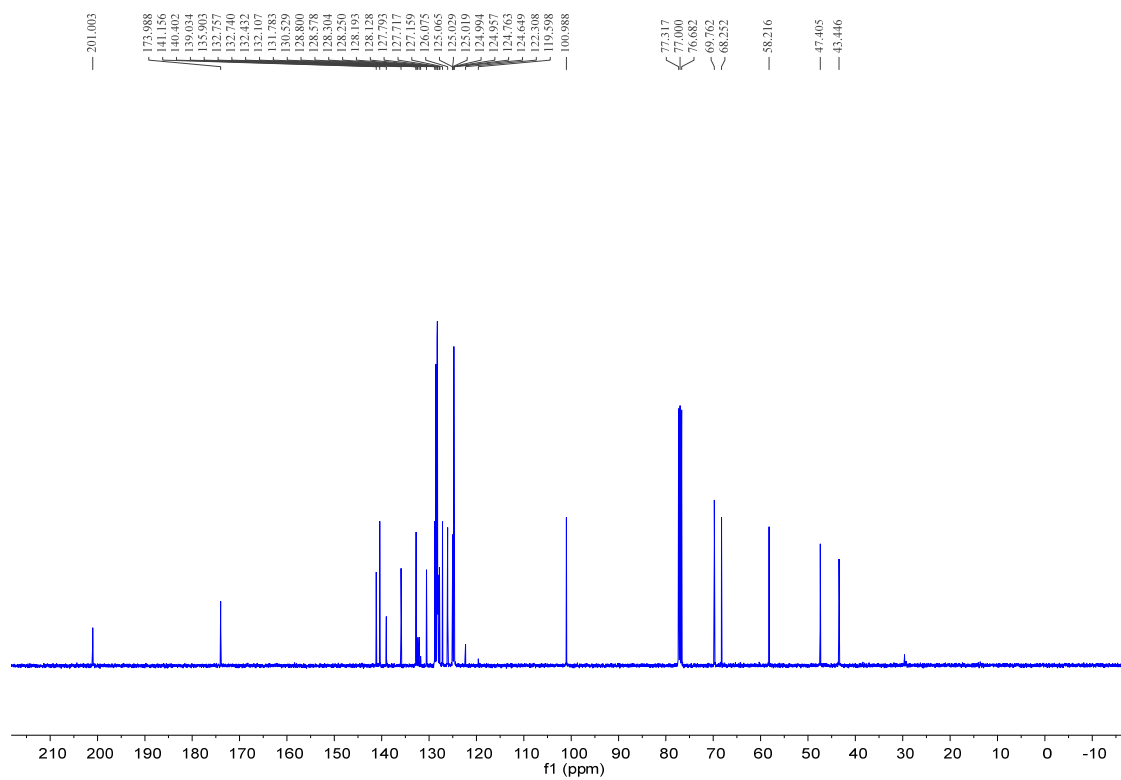 $^{19}\text{F}$  NMR (376 MHz,  $\text{CDCl}_3$ )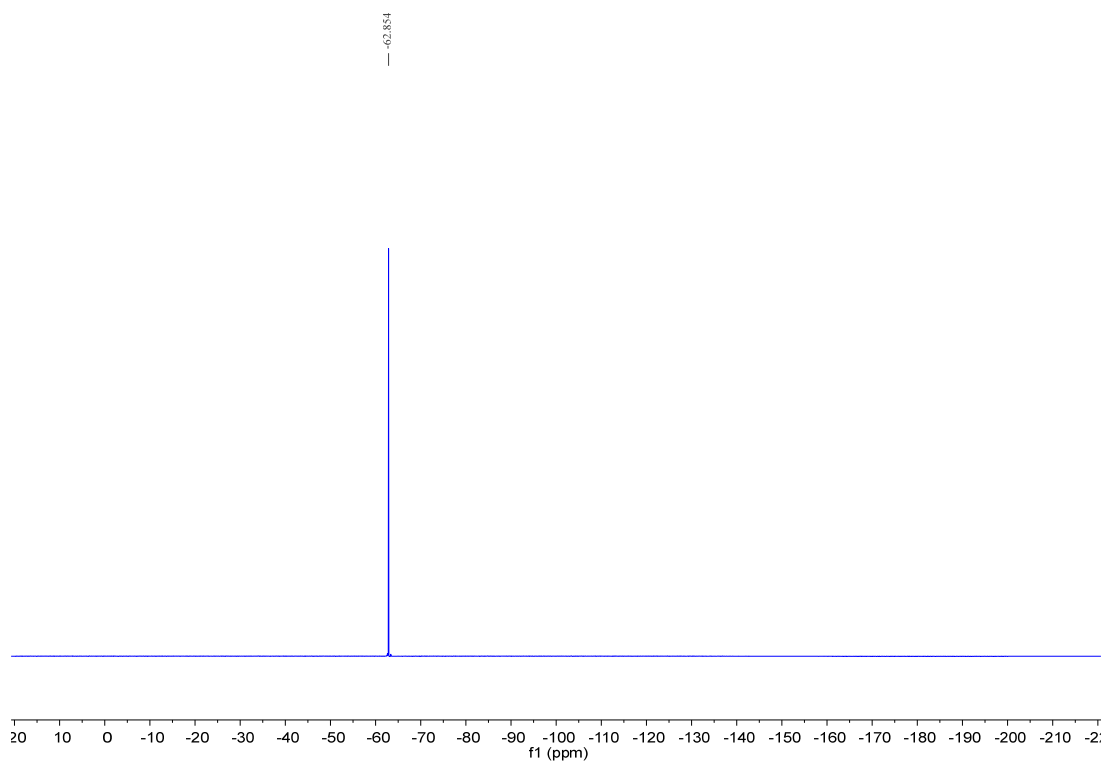

**$^1\text{H}$ ,  $^{13}\text{C}$  and  $^{19}\text{F}$  NMR Spectra for Compound (*R*)-3ad:** $^1\text{H}$  NMR (400 MHz,  $\text{CDCl}_3$ )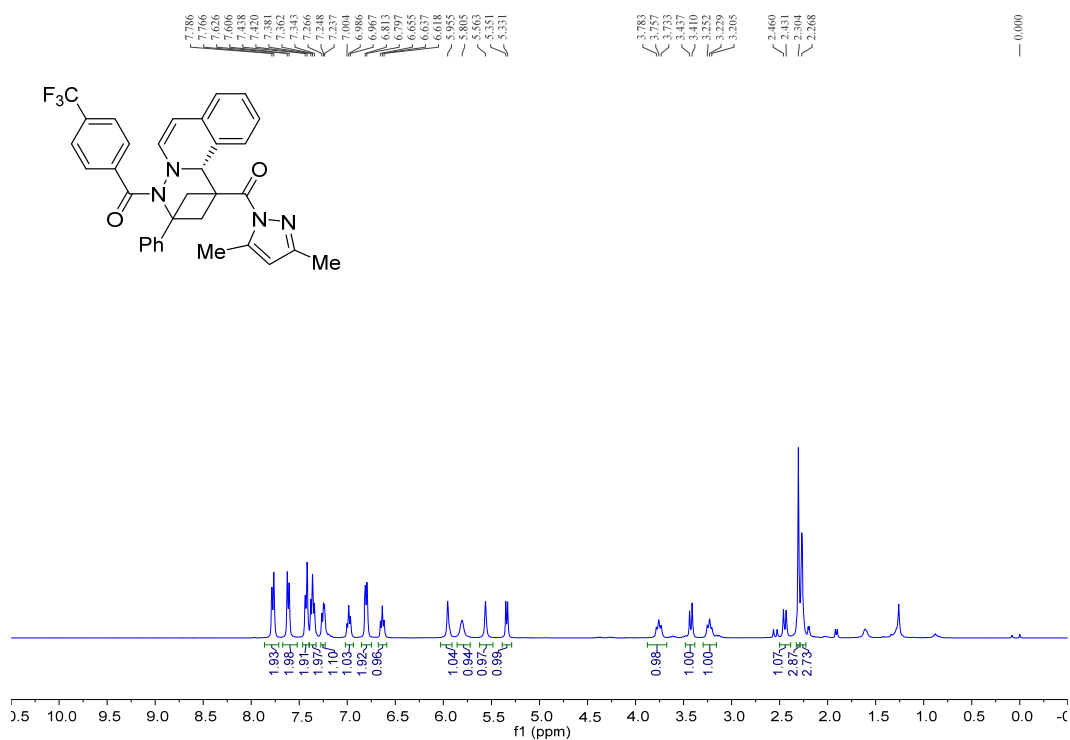 $^{13}\text{C}$  NMR (100 MHz,  $\text{CDCl}_3$ )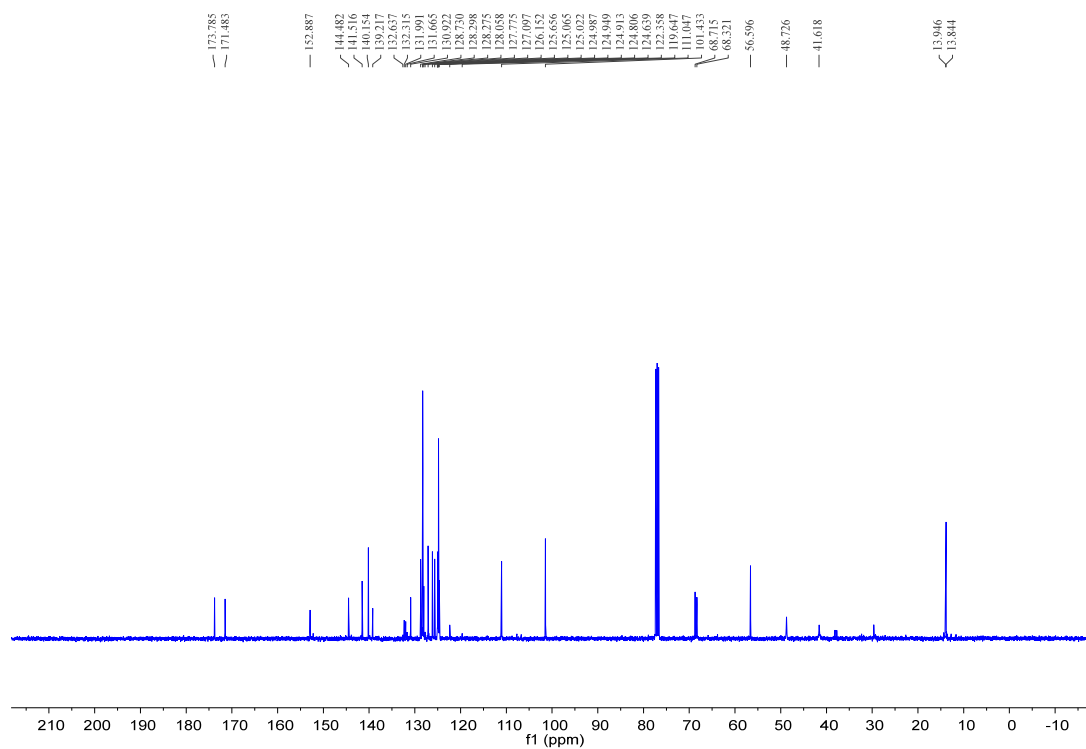



$^{19}\text{F}$  NMR (376 MHz,  $\text{CDCl}_3$ )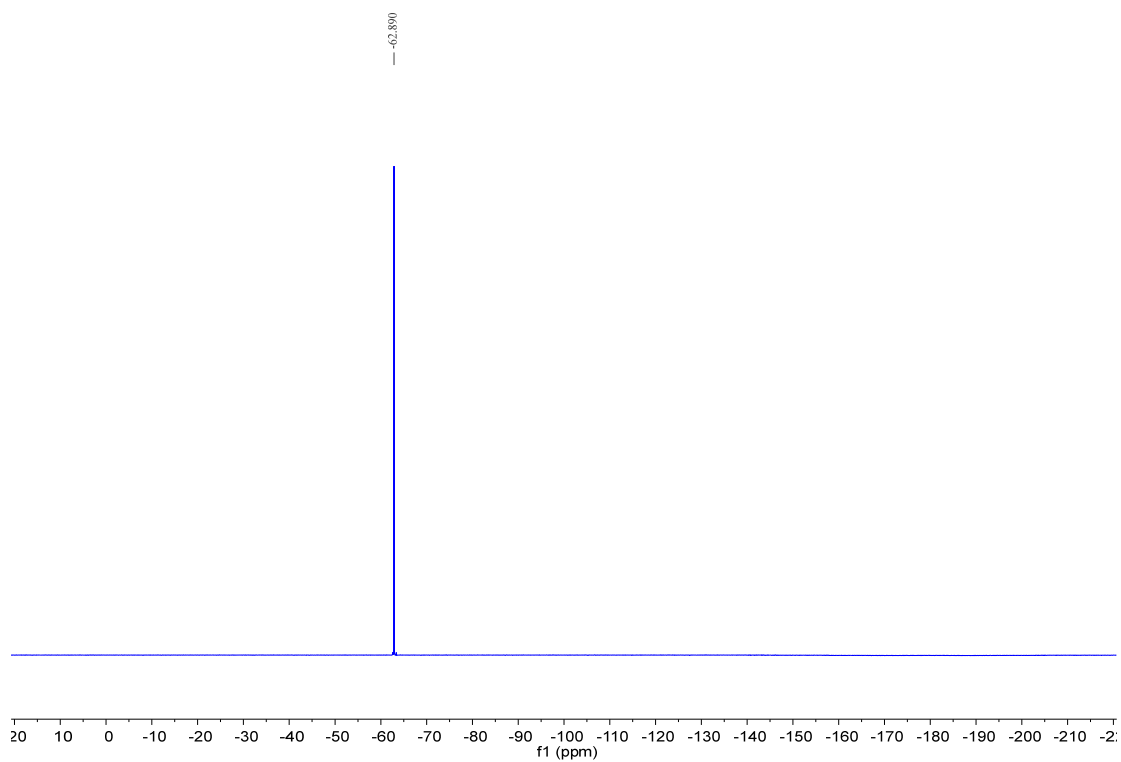 $^1\text{H}$ ,  $^{13}\text{C}$  and  $^{19}\text{F}$  NMR Spectra for Compound 3od: $^1\text{H}$  NMR (400 MHz,  $\text{CDCl}_3$ )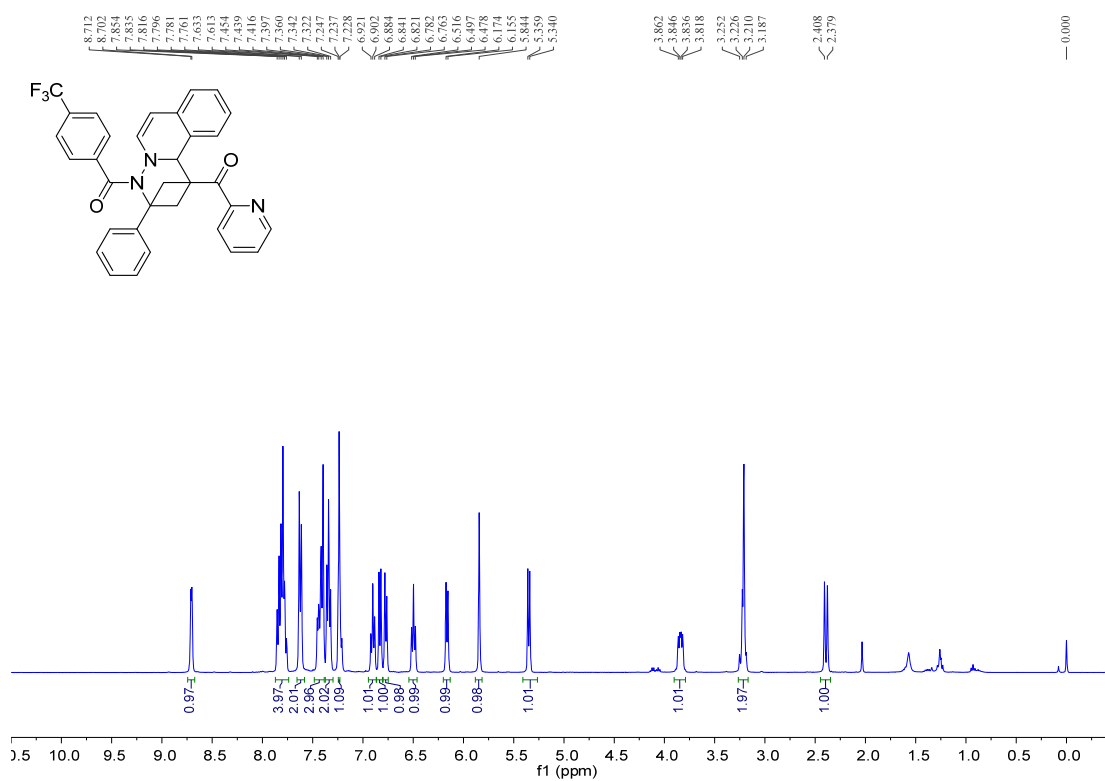

$^{13}\text{C}$  NMR (100 MHz,  $\text{CDCl}_3$ )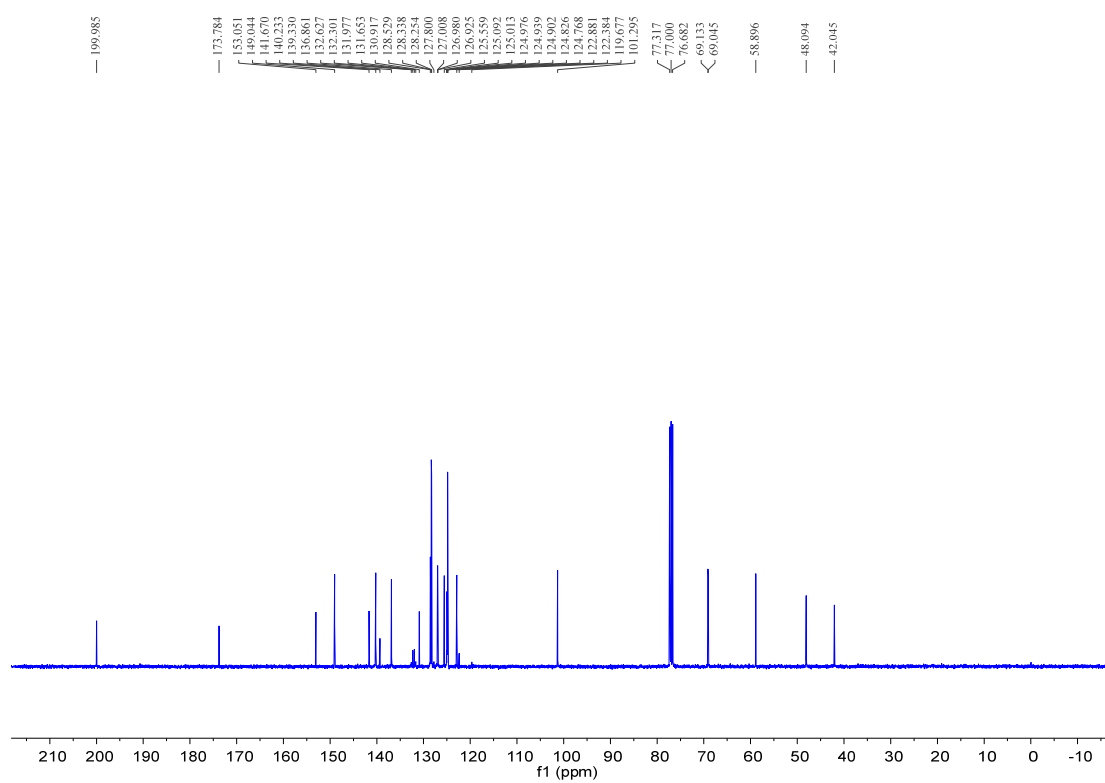 $^{19}\text{F}$  NMR (376 MHz,  $\text{CDCl}_3$ )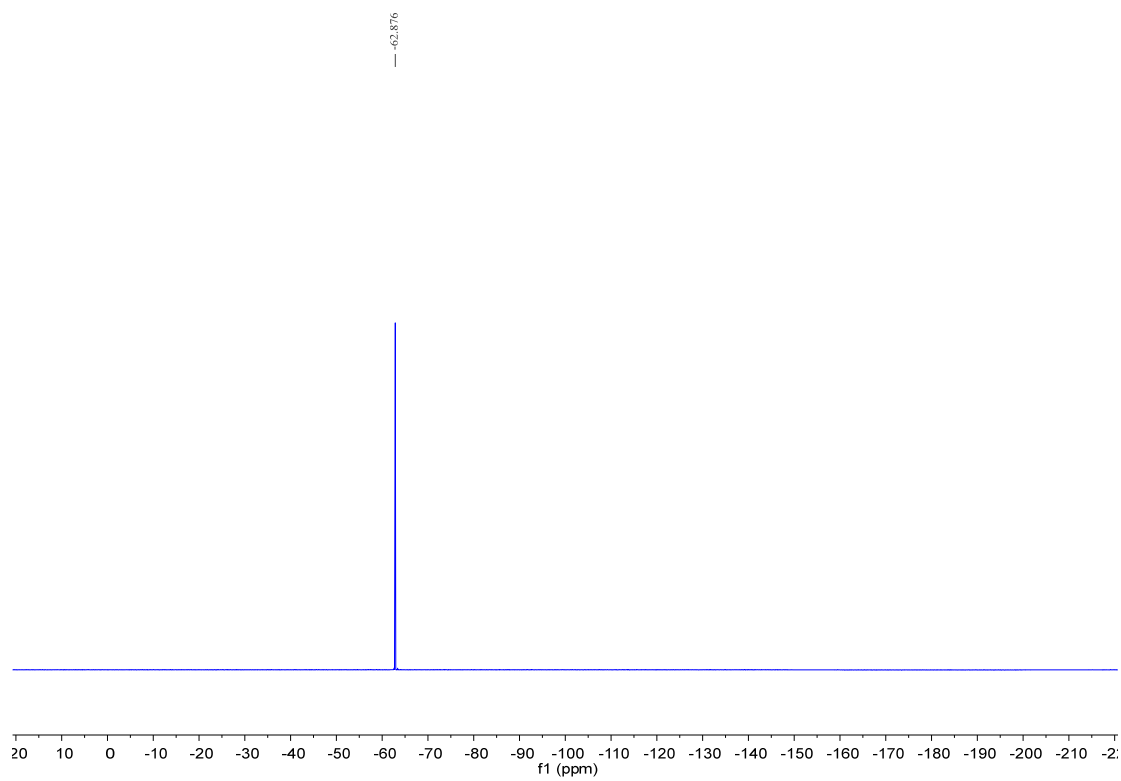

**$^1\text{H}$ ,  $^{13}\text{C}$  and  $^{19}\text{F}$  NMR Spectra for Compound (*R*)-3bbd:** **$^1\text{H}$  NMR (400 MHz,  $\text{CDCl}_3$ )**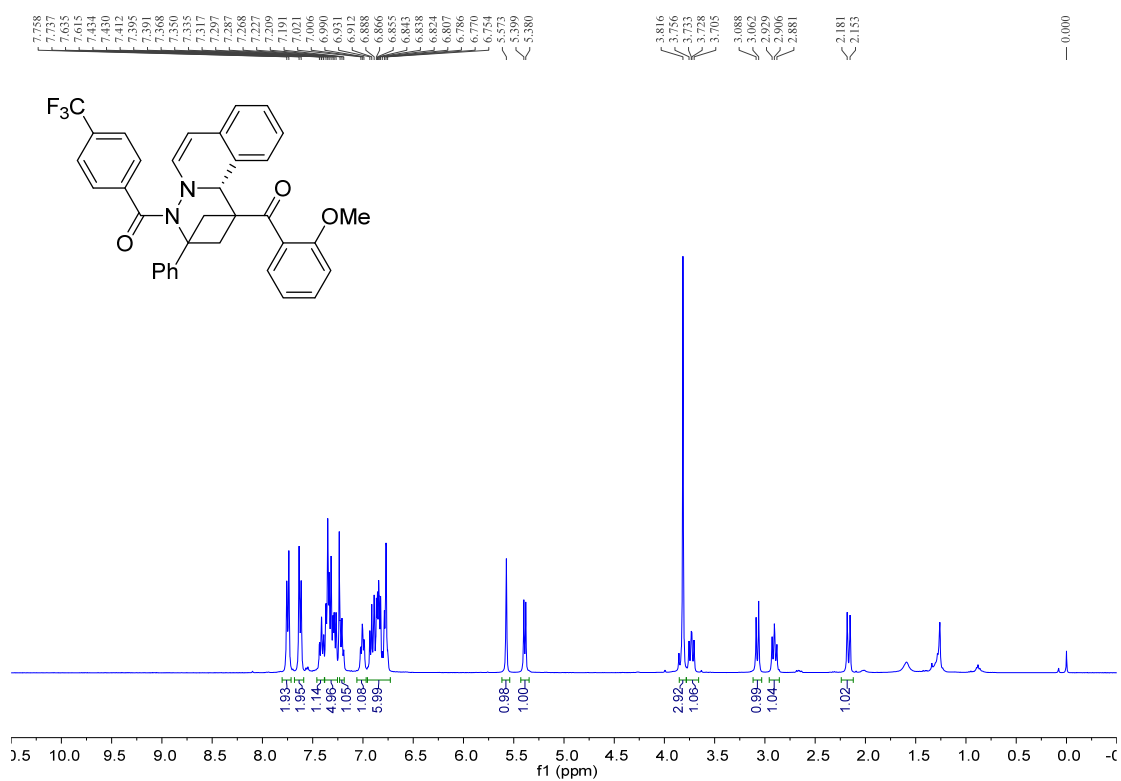 **$^{13}\text{C}$  NMR (100 MHz,  $\text{CDCl}_3$ )**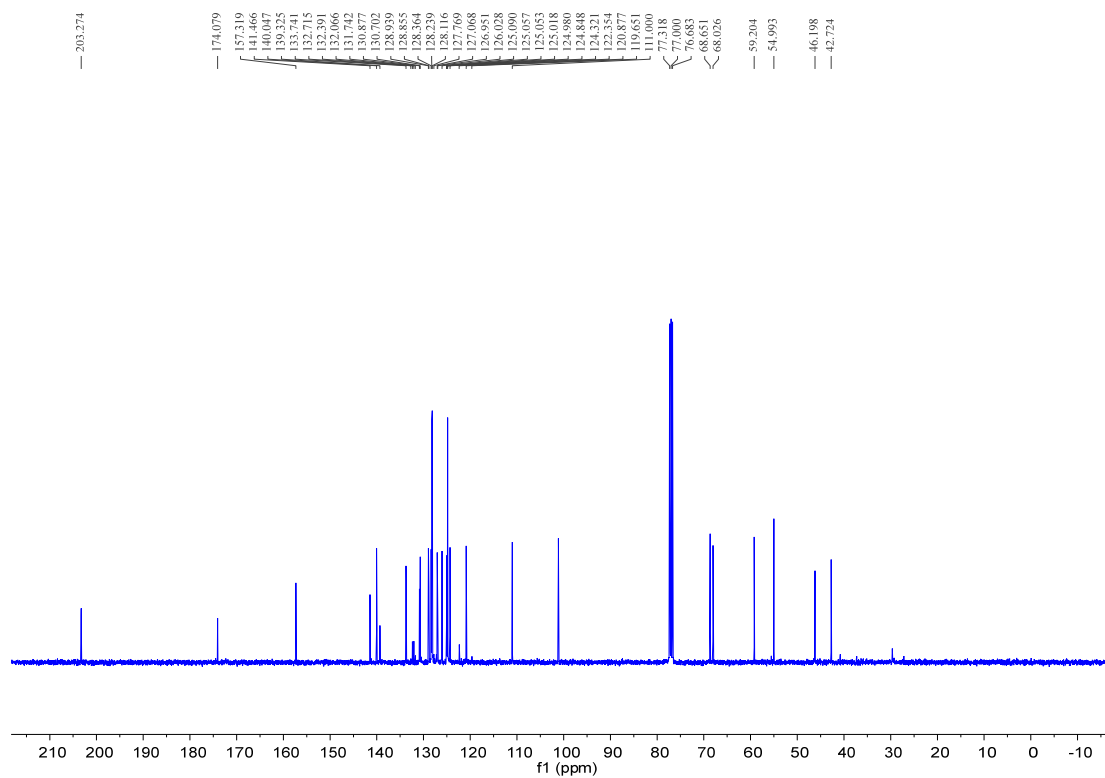

$^{19}\text{F}$  NMR (376 MHz,  $\text{CDCl}_3$ )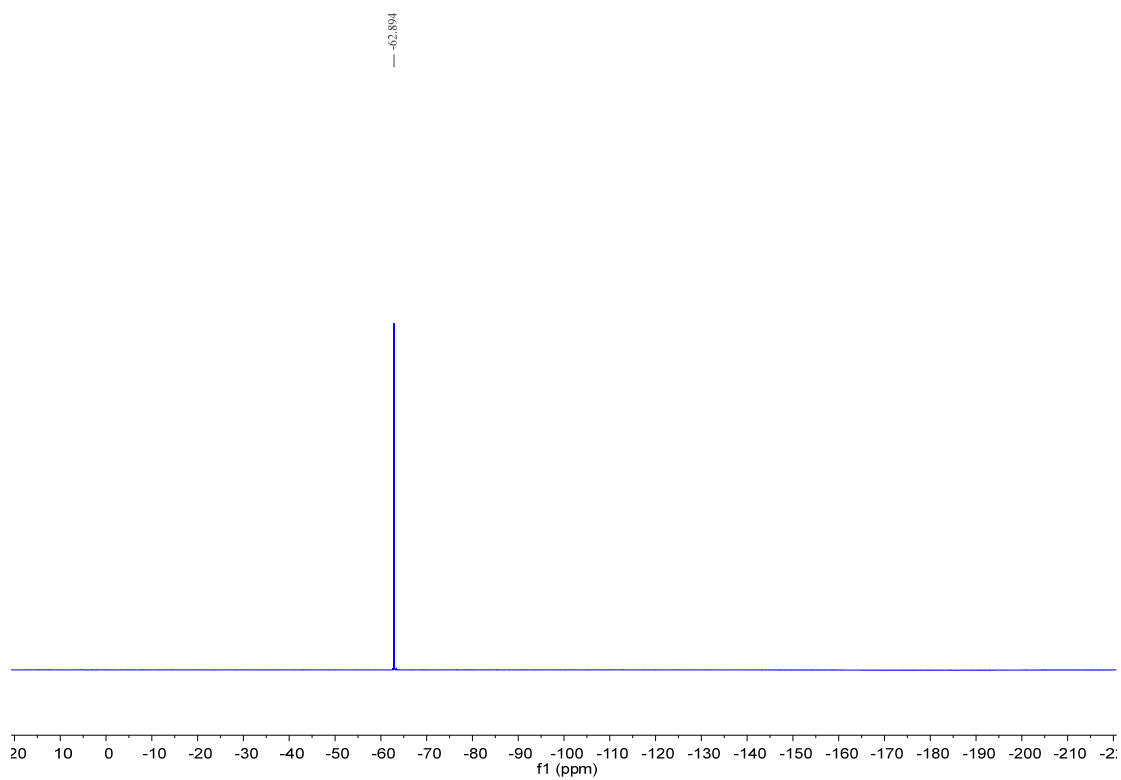 $^1\text{H}$ ,  $^{13}\text{C}$  and  $^{19}\text{F}$  NMR Spectra for Compound (*R*)-4qaa: $^1\text{H}$  NMR (400 MHz,  $\text{CDCl}_3$ )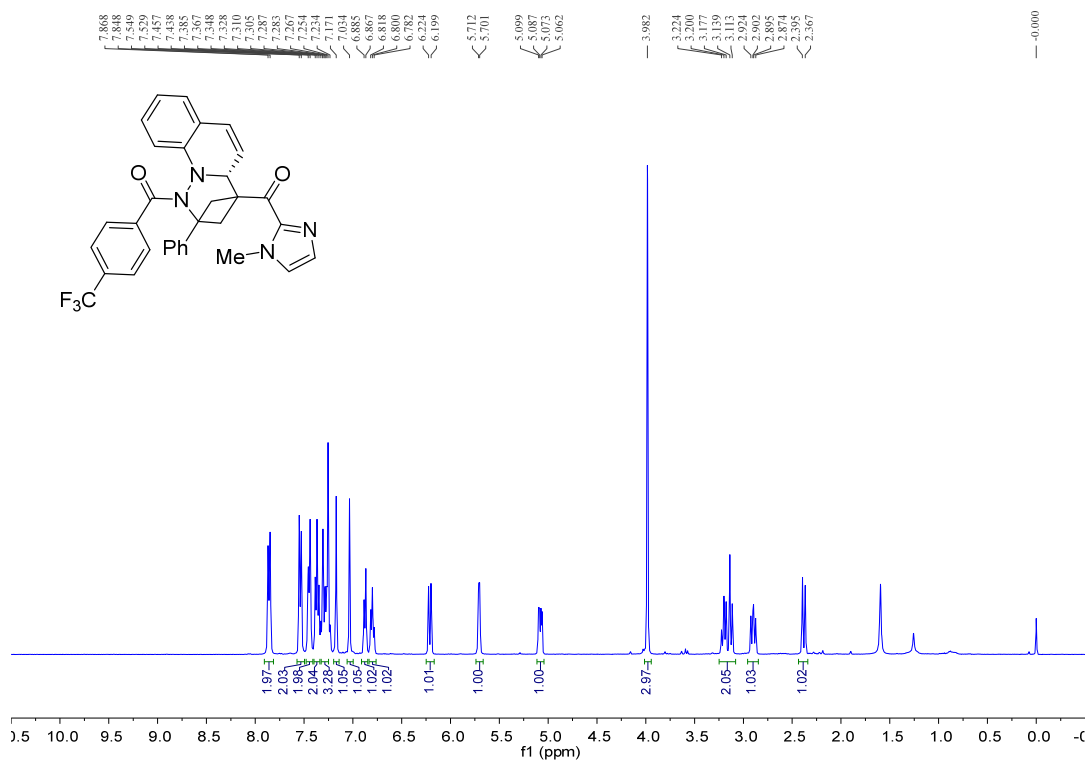

$^{13}\text{C}$  NMR (100 MHz,  $\text{CDCl}_3$ )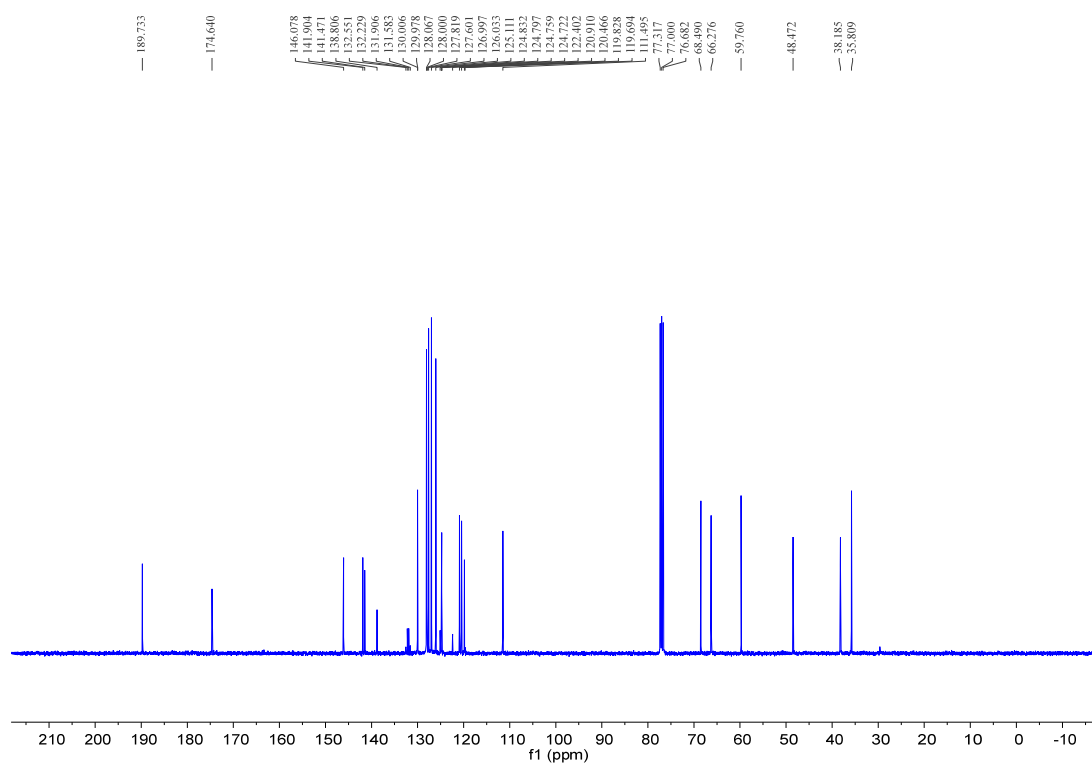 $^{19}\text{F}$  NMR (376 MHz,  $\text{CDCl}_3$ )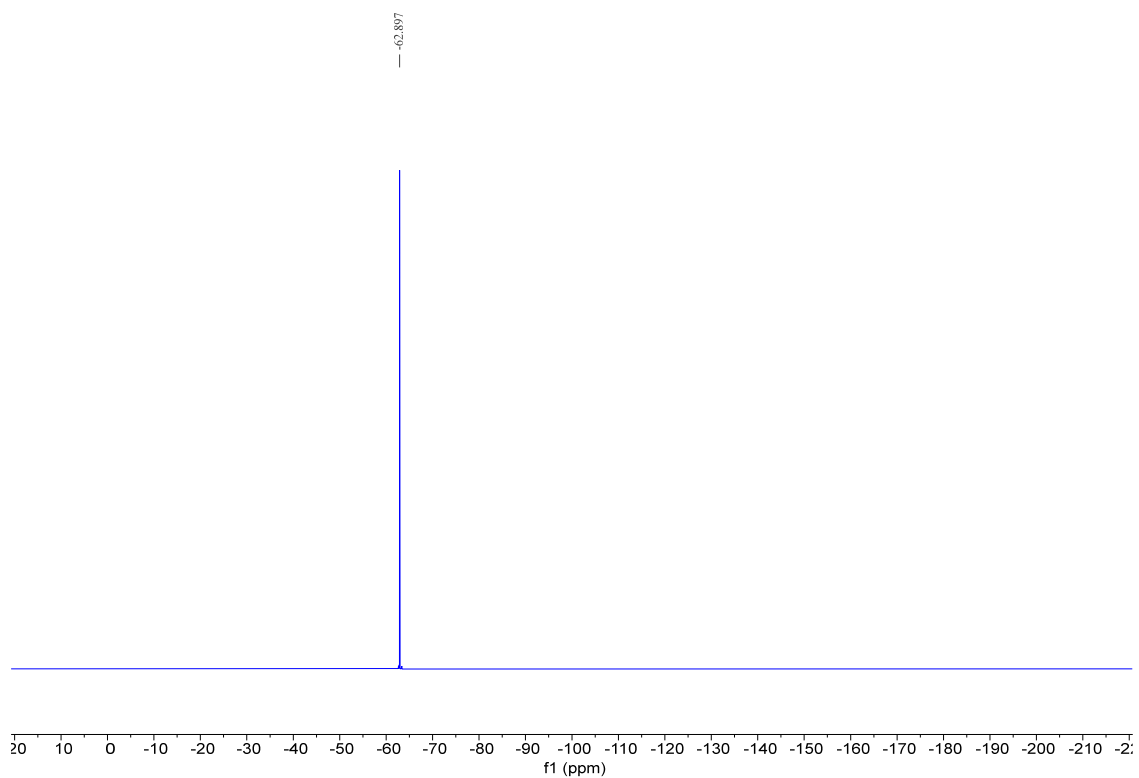

### 13 Crystal Structure of 3qq and (R)-3qw

The crystals are grown by slow solvent (CH<sub>2</sub>Cl<sub>2</sub>/Et<sub>2</sub>O/*n*-Hexane) evaporation at room temperature. CCDC number of *rac*-**3qq** is 2375376. The thermal ellipsoids are 50% probability level.

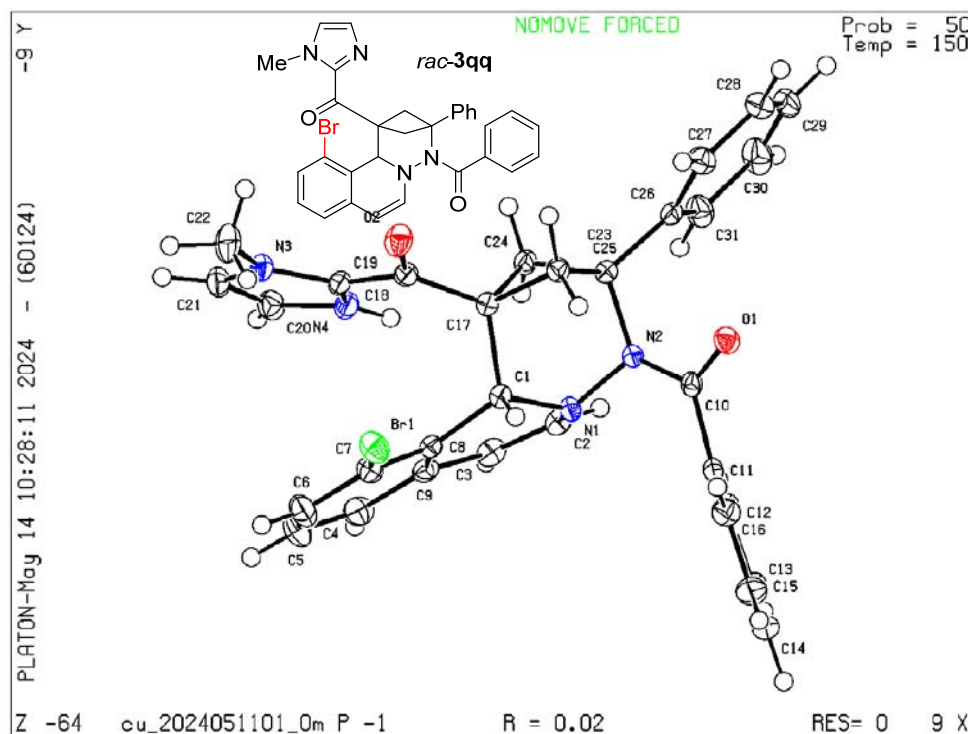

#### Datablock: cu\_2024051101\_0m

|                        |                                            |                                    |                                    |
|------------------------|--------------------------------------------|------------------------------------|------------------------------------|
| Bond precision:        | C-C = 0.0025 Å                             | Wavelength=1.54178                 |                                    |
| Cell:                  | a=9.8157 (2)<br>alpha=102.996 (1)          | b=11.2682 (3)<br>beta=101.657 (1)  | c=14.0489 (4)<br>gamma=114.452 (1) |
| Temperature:           | 150 K                                      |                                    |                                    |
| Volume                 | Calculated<br>1299.74 (6)                  | Reported<br>1299.74 (6)            |                                    |
| Space group            | P -1                                       | P -1                               |                                    |
| Hall group             | -P 1                                       | -P 1                               |                                    |
| Moiety formula         | C31 H26 Br N4 O2                           | C31 H26 Br N4 O2                   |                                    |
| Sum formula            | C31 H26 Br N4 O2                           | C31 H25 Br N4 O2                   |                                    |
| Mr                     | 566.46                                     | 565.46                             |                                    |
| Dx, g cm <sup>-3</sup> | 1.447                                      | 1.445                              |                                    |
| Z                      | 2                                          | 2                                  |                                    |
| Mu (mm <sup>-1</sup> ) | 2.447                                      | 2.447                              |                                    |
| F000                   | 582.0                                      | 580.0                              |                                    |
| F000'                  | 582.11                                     |                                    |                                    |
| h,k,lmax               | 11,13,16                                   | 11,13,16                           |                                    |
| Nref                   | 4762                                       | 4746                               |                                    |
| Tmin,Tmax              | 0.756,0.891                                | 0.073,0.894                        |                                    |
| Tmin'                  | 0.686                                      |                                    |                                    |
| Correction method=     | # Reported T Limits: Tmin=0.073 Tmax=0.894 |                                    |                                    |
| AbsCorr =              | MULTI-SCAN                                 |                                    |                                    |
| Data completeness=     | 0.997                                      | Theta(max)= 68.224                 |                                    |
| R(reflections)=        | 0.0242( 4670)                              | wR2(reflections)=<br>0.0626( 4746) |                                    |
| S =                    | 1.053                                      | Npar= 344                          |                                    |

**Note:** After one recrystallization (CH<sub>2</sub>Cl<sub>2</sub>/*n*-Hexane), the ee value of (*R*)-**3qw** increased to 96%. CCDC number of (*R*)-**3qw** (96% ee) is 2375377.

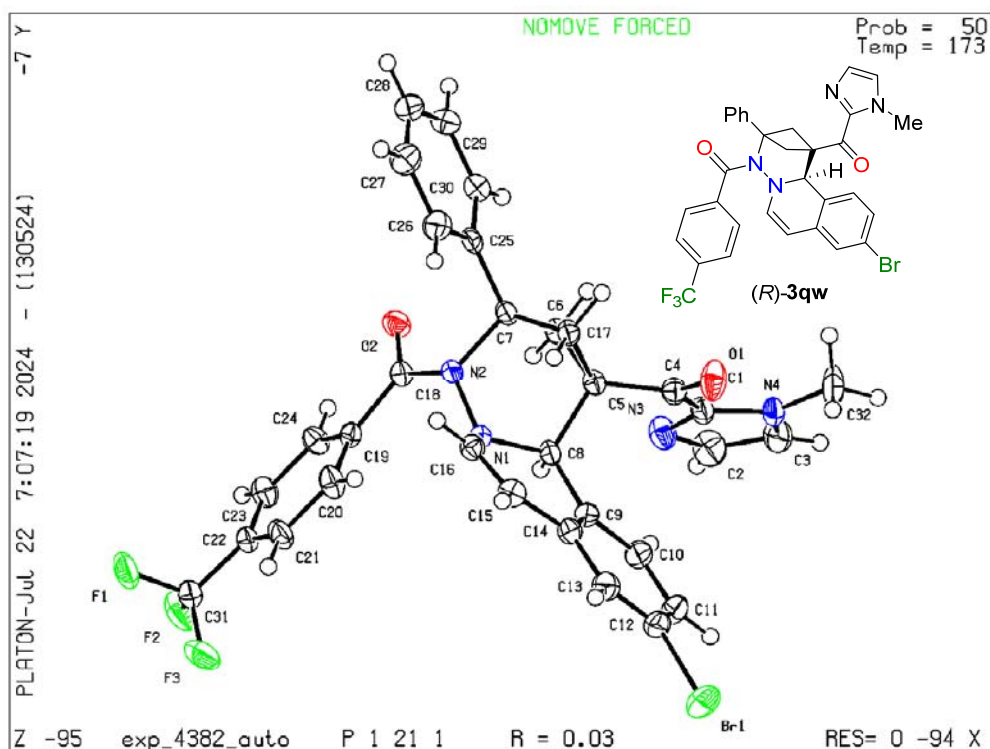

### Datablock: exp\_4382\_auto

Bond precision: C-C = 0.0049 Å Wavelength=1.54184

Cell: a=10.8729(2) b=12.8772(1) c=10.9786(2)  
alpha=90 beta=112.161(2) gamma=90

Temperature: 173 K

|                        | Calculated          | Reported            |
|------------------------|---------------------|---------------------|
| Volume                 | 1423.59(4)          | 1423.59(4)          |
| Space group            | P 21                | P 1 21 1            |
| Hall group             | P 2yb               | P 2yb               |
| Moiety formula         | C32 H24 Br F3 N4 O2 | C32 H24 Br F3 N4 O2 |
| Sum formula            | C32 H24 Br F3 N4 O2 | C32 H24 Br F3 N4 O2 |
| Mr                     | 633.45              | 633.46              |
| Dx, g cm <sup>-3</sup> | 1.478               | 1.478               |
| Z                      | 2                   | 2                   |
| Mu (mm <sup>-1</sup> ) | 2.457               | 2.457               |
| F000                   | 644.0               | 644.0               |
| F000'                  | 644.58              |                     |
| h, k, lmax             | 12, 15, 13          | 12, 15, 13          |
| Nref                   | 5077 [ 2662]        | 5058                |
| Tmin, Tmax             | 0.488, 0.582        | 0.539, 1.000        |
| Tmin'                  | 0.434               |                     |

Correction method= # Reported T Limits: Tmin=0.539 Tmax=1.000  
AbsCorr = MULTI-SCAN

Data completeness= 1.90/1.00 Theta(max)= 67.069

R(reflections)= 0.0322( 4895) wR2(reflections)=  
0.0842( 5058)

S = 1.088 Npar= 380

The detailed crystal data and structure refinement for (*R*)-3qw are presented below (the Flack parameter is -0.032(8))

|                                             |                                                                                |
|---------------------------------------------|--------------------------------------------------------------------------------|
| Identification code                         | exp_4382_auto                                                                  |
| Empirical formula                           | C <sub>32</sub> H <sub>24</sub> BrF <sub>3</sub> N <sub>4</sub> O <sub>2</sub> |
| Formula weight                              | 633.46                                                                         |
| Temperature/K                               | 172.99(10)                                                                     |
| Crystal system                              | monoclinic                                                                     |
| Space group                                 | P2 <sub>1</sub>                                                                |
| a/Å                                         | 10.8729(2)                                                                     |
| b/Å                                         | 12.87720(10)                                                                   |
| c/Å                                         | 10.9786(2)                                                                     |
| α/°                                         | 90                                                                             |
| β/°                                         | 112.161(2)                                                                     |
| γ/°                                         | 90                                                                             |
| Volume/Å <sup>3</sup>                       | 1423.59(4)                                                                     |
| Z                                           | 2                                                                              |
| ρ <sub>calc</sub> /cm <sup>3</sup>          | 1.478                                                                          |
| μ/mm <sup>-1</sup>                          | 2.457                                                                          |
| F(000)                                      | 644.0                                                                          |
| Crystal size/mm <sup>3</sup>                | 0.32 × 0.26 × 0.22                                                             |
| Radiation                                   | Cu Kα (λ = 1.54184)                                                            |
| 2θ range for data collection/°              | 8.696 to 134.138                                                               |
| Index ranges                                | -12 ≤ h ≤ 12, -15 ≤ k ≤ 15, -13 ≤ l ≤ 13                                       |
| Reflections collected                       | 32191                                                                          |
| Independent reflections                     | 5058 [R <sub>int</sub> = 0.0775, R <sub>sigma</sub> = 0.0378]                  |
| Data/restraints/parameters                  | 5058/1/380                                                                     |
| Goodness-of-fit on F <sup>2</sup>           | 1.088                                                                          |
| Final R indexes [I >= 2σ (I)]               | R <sub>1</sub> = 0.0322, wR <sub>2</sub> = 0.0822                              |
| Final R indexes [all data]                  | R <sub>1</sub> = 0.0334, wR <sub>2</sub> = 0.0842                              |
| Largest diff. peak/hole / e Å <sup>-3</sup> | 0.21/-0.54                                                                     |
| Flack parameter                             | -0.032(8)                                                                      |



## 14 References

- [1] (a) Dhake, K.; Woelk, K. J.; Becica, J.; Un, A.; Jenny, S. E.; Leitch, D. C. Beyond Bioisosteres: Divergent Synthesis of Azabicyclohexanes and Cyclobutenyl Amines from Bicyclobutanes. *Angew. Chem. Int. Ed.* **2022**, *61*, e202204719. (b) Livingstone, K.; Siebold, K.; Meyer, S.; Martín-Heras, V.; Daniliuc, C. G.; Gilmour, R. Skeletal Ring Contractions via I(I)/I(III) Catalysis: Stereoselective Synthesis of *cis*- $\alpha,\alpha$ -Difluorocyclopropanes. *ACS Catal.* **2022**, *12*, 14507–14516. (c) Guo, R.; Chang, Y.-C.; Herter, L.; Salome, C.; Braley, S. E.; Fessard, T. C.; Brown, M. K. Strain-Release  $[2\pi+2\sigma]$  Cycloadditions for the Synthesis of Bicyclo[2.1.1]hexanes Initiated by Energy Transfer. *J. Am. Chem. Soc.* **2022**, *144*, 7988–7994. (d) Sharland, J. C.; Davies, H. M. L. One-Pot Synthesis of Difluorobicyclo[1.1.1]pentanes from  $\alpha$ -Allyldiazoacetates. *Org. Lett.* **2023**, *25*, 5214–5219. (e) Liang, Y.; Paulus, F.; Daniliuc, C. G.; Glorius, F. Catalytic Formal  $[2\pi+2\sigma]$  Cycloaddition of Aldehydes with Bicyclobutanes: Expedient Access to Polysubstituted 2-Oxabicyclo[2.1.1]hexanes. *Angew. Chem. Int. Ed.* **2023**, *62*, e202305043. (f) Xiao, Y.; Wu, F.; Tang, L.; Zhang, X.; Wei, M.; Wang, G.; Feng, J.-J. Divergent Synthesis of Sulfur-Containing Bridged Cyclobutanes by Lewis Acid Catalyzed Formal Cycloadditions of Pyridinium 1,4-Zwitterionic Thiolates and Bicyclobutanes. *Angew. Chem. Int. Ed.* **2024**, *63*, e202408578. (g) Wang, J.-J.; Tang, L.; Xiao, Y.; Wu, W.-B.; Wang, G.; Feng, J.-J., Switching between the  $[2\pi+2\sigma]$  and Hetero- $[4\pi+2\sigma]$  Cycloaddition Reactivity of Bicyclobutanes with Lewis Acid Catalysts Enables the Synthesis of Spirocycles and Bridged Heterocycles. *Angew. Chem. Int. Ed.* **2024**, *63*, e202405222.
- [2] (a) Zhou, Y.-Y.; Li, J.; Ling, L.; Liao, S.-H.; Sun, X.-L.; Li, Y.-X.; Wang, L.-J.; Tang, Y. Highly Enantioselective  $[3+3]$  Cycloaddition of Aromatic Azomethine Imines with Cyclopropanes Directed by  $\pi$ - $\pi$  Stacking Interactions. *Angew. Chem. Int. Ed.* **2013**, *52*, 1452-1456. (b) Li, W.; Zhang, M.; Yan, J.; Ni, L.; Cao, H.; Liu, X. Transition metal- and oxidant-free  $[3+2]$  cyclization of azomethine imines utilizing vinylene carbonate as dual synthons. *Org. Chem. Front.* **2022**, *9*, 2529-2533. (c) Perreault,

C.; Goudreau, S. R.; Zimmer, L. E.; Charette, A. B. Cycloadditions of Aromatic Azomethine Imines with 1,1-Cyclopropane Diesters. *Org. Lett.* **2008**, *10*, 689-692.

[3] Pitzer, L.; Schäfers, F.; Glorius, F. Rapid Assessment of the Reaction-Condition-Based Sensitivity of Chemical Transformations. *Angew. Chem. Int. Ed.* **2019**, *58*, 8572–8576.
